# Supplementary material
Source: JCI journal article supplement (doi:10.1172/jci197274)

**Fig1D**

**MMA-IP**

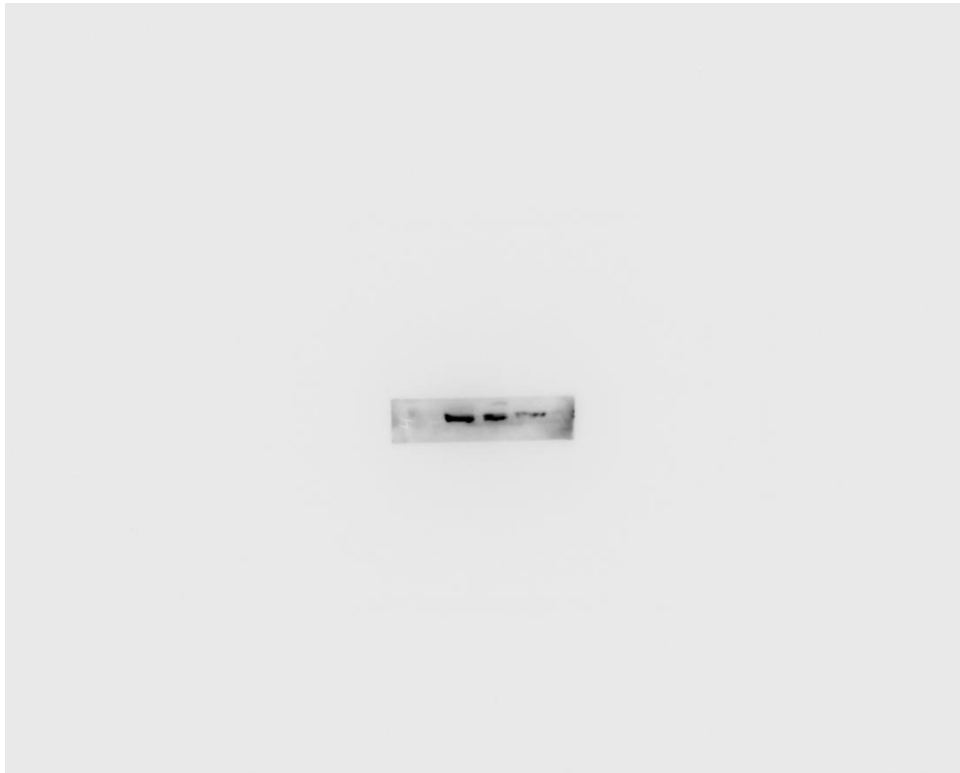

**GFP-IP**

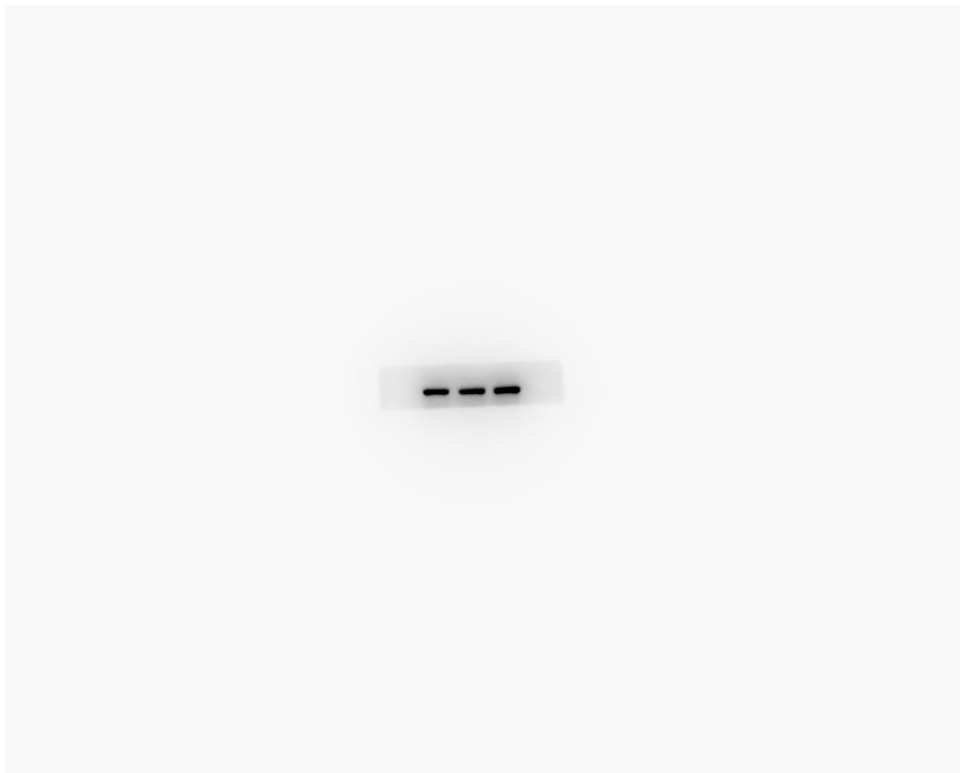

**GFP-Input**

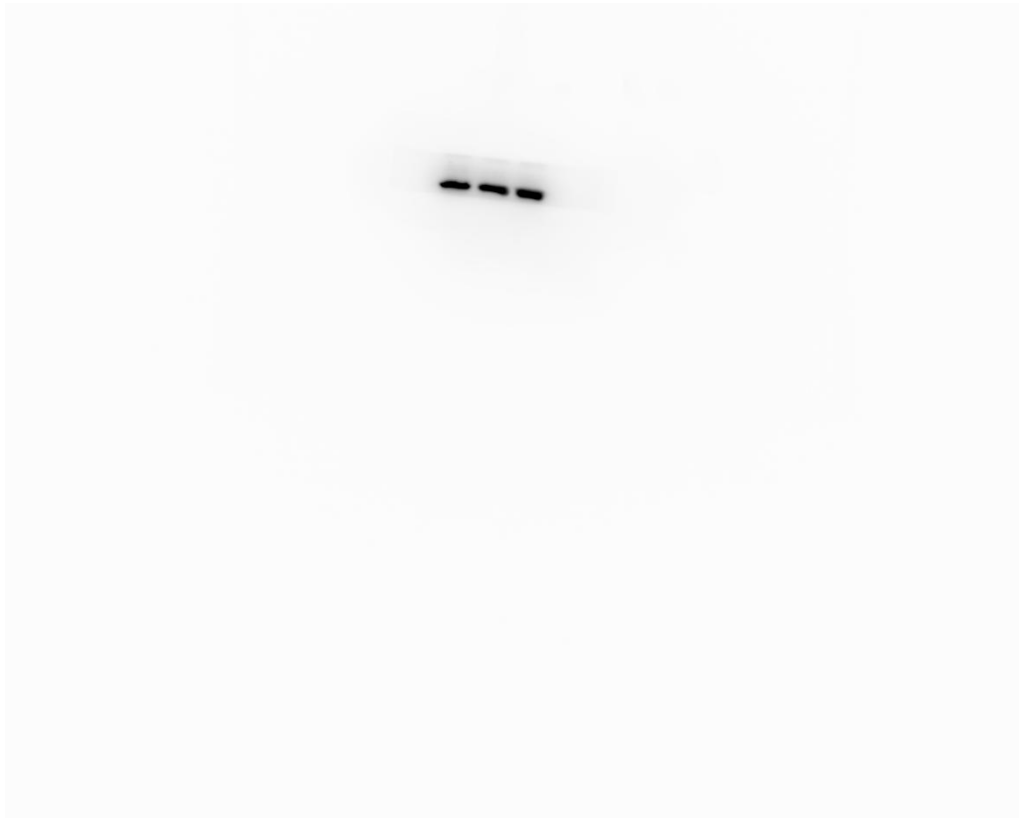

**ACTIN-Input**

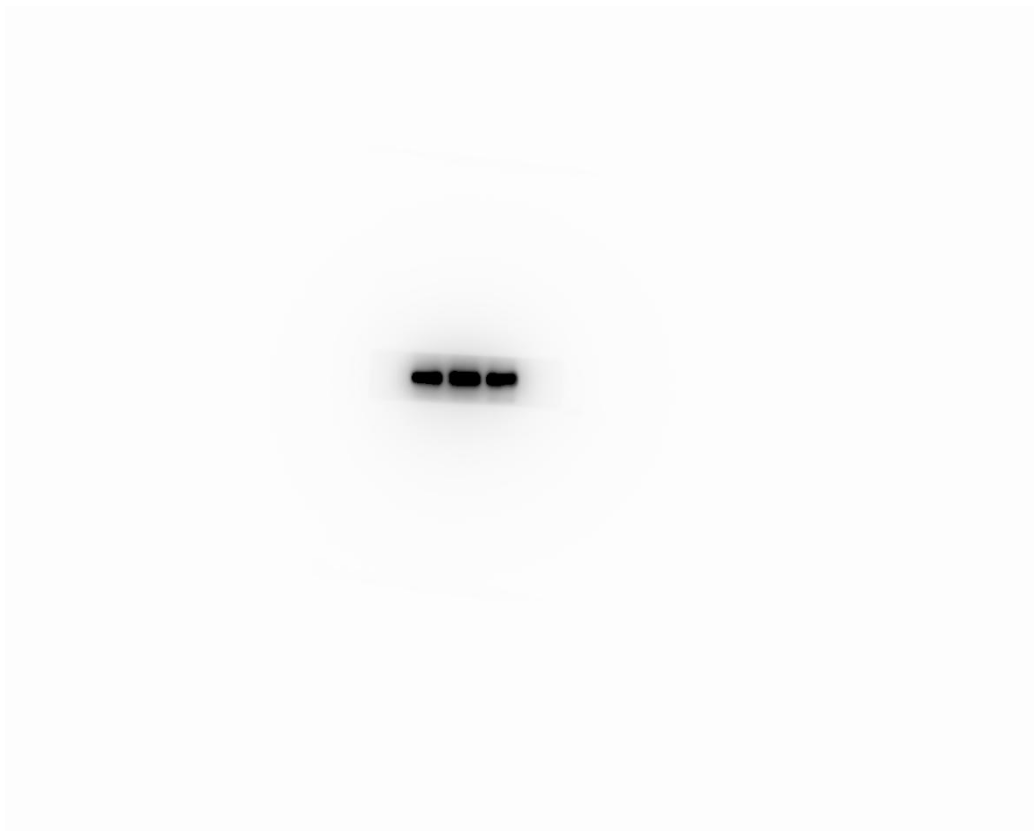

**Fig1E**

**MMA-IP**

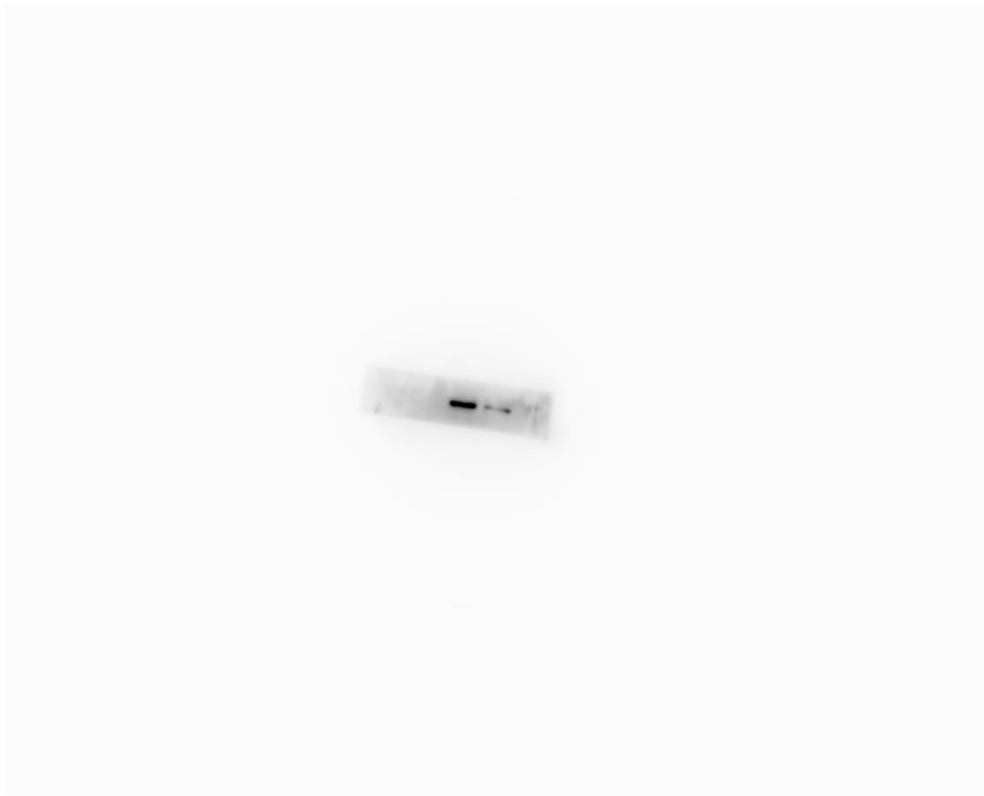

**FBXO7-IP**

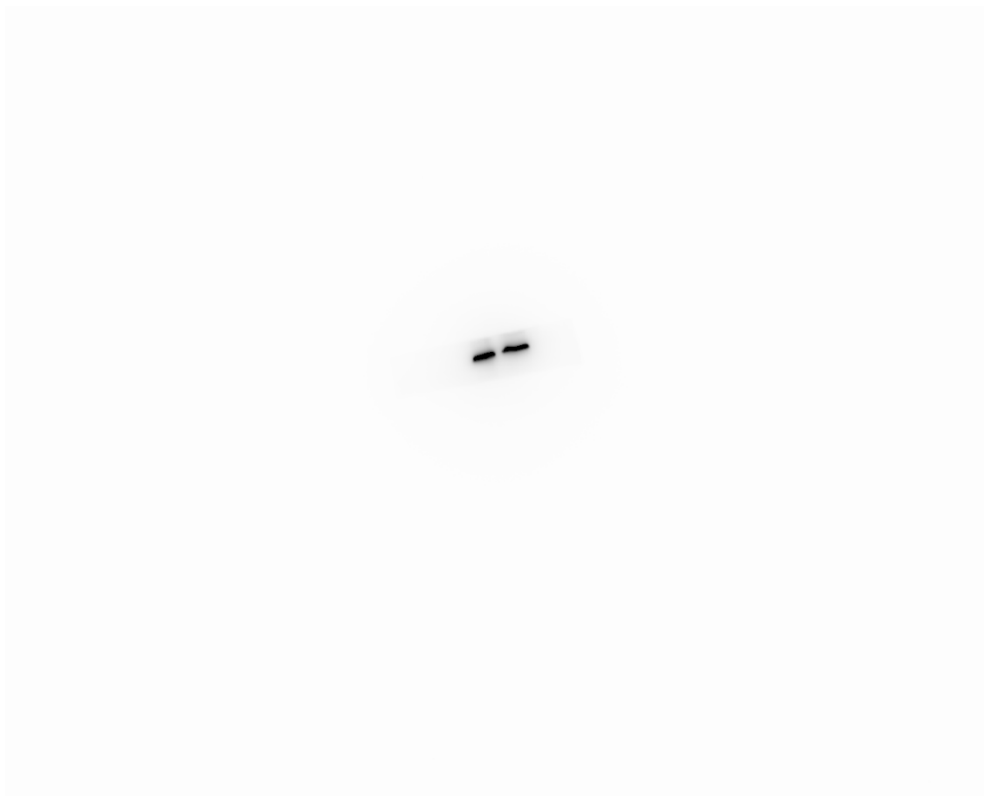

**FBXO7-Input**

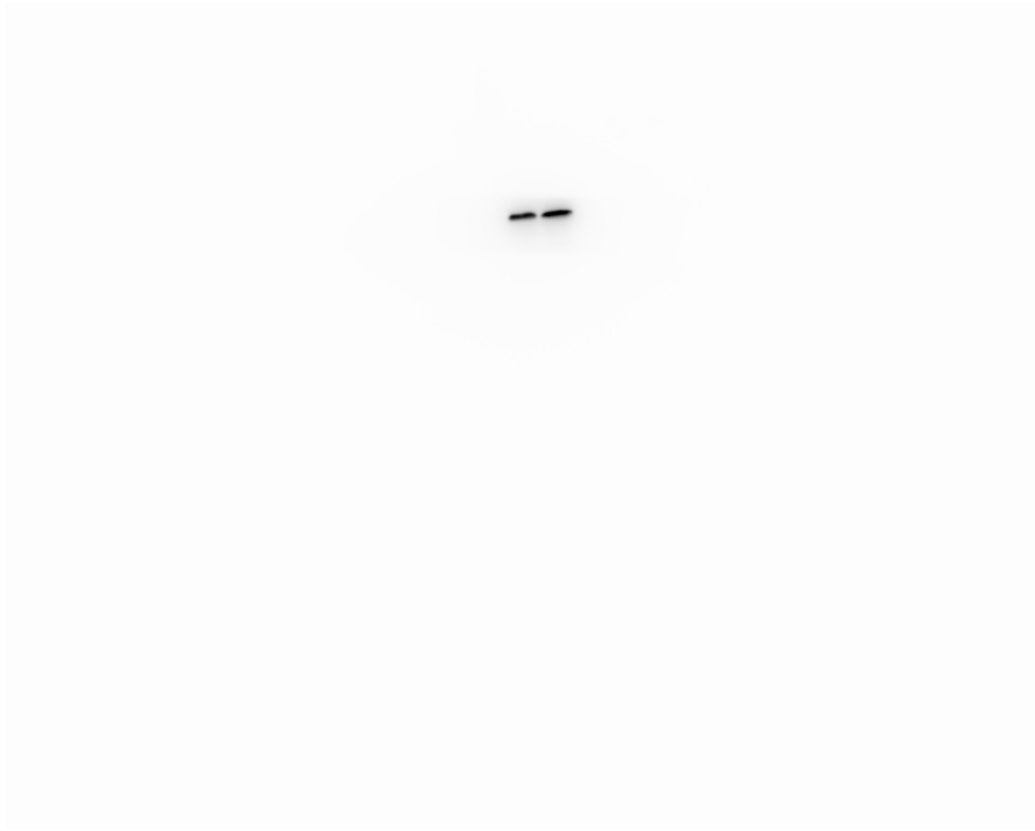

**ACTIN-Input**

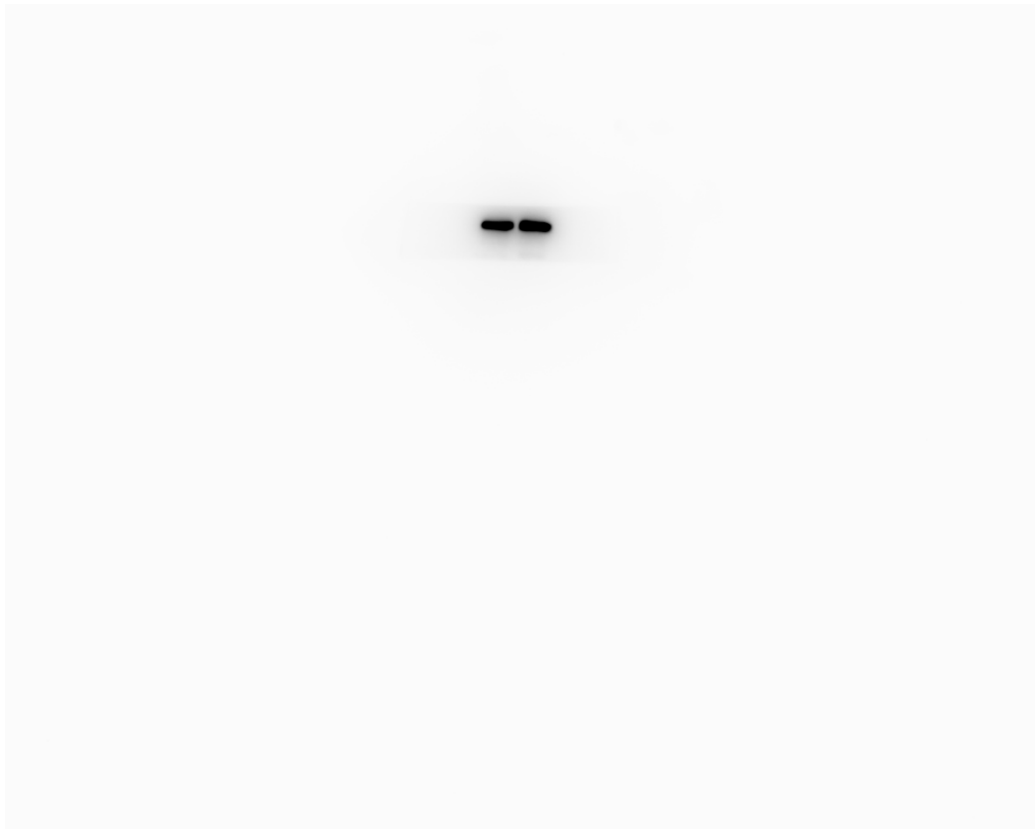

**Fig1F**

**FBXO7<sup>me</sup>-IP**

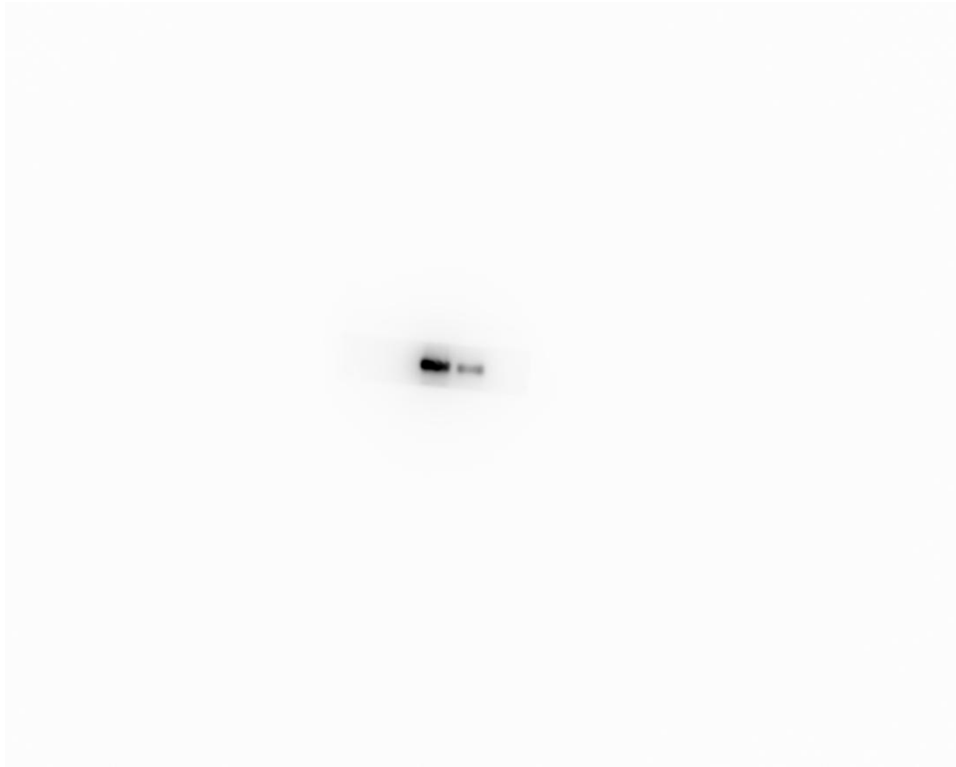

**FBXO7-IP**

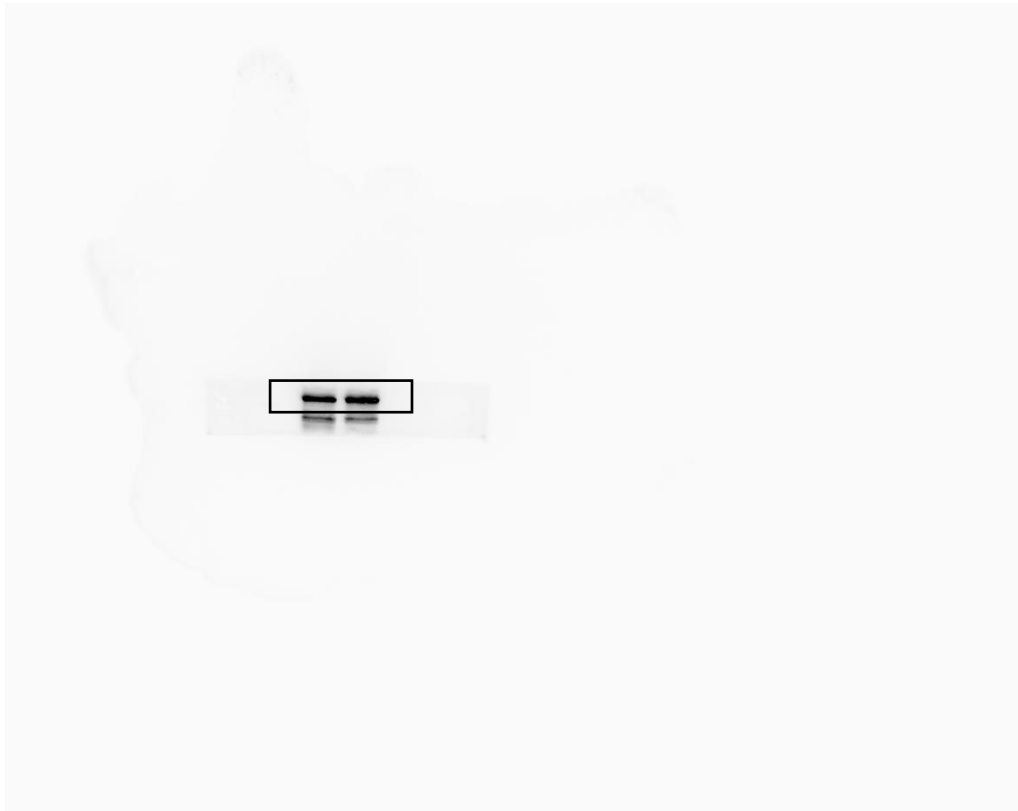

**FBXO7-Input**

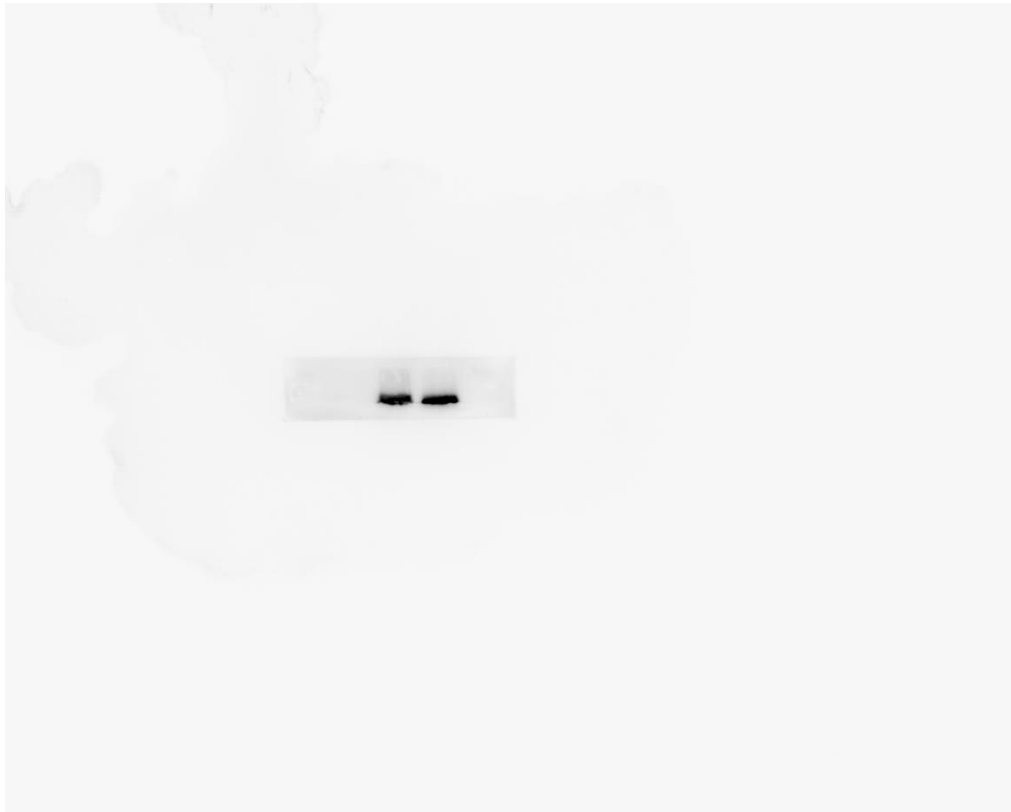

**ACTIN-Input**

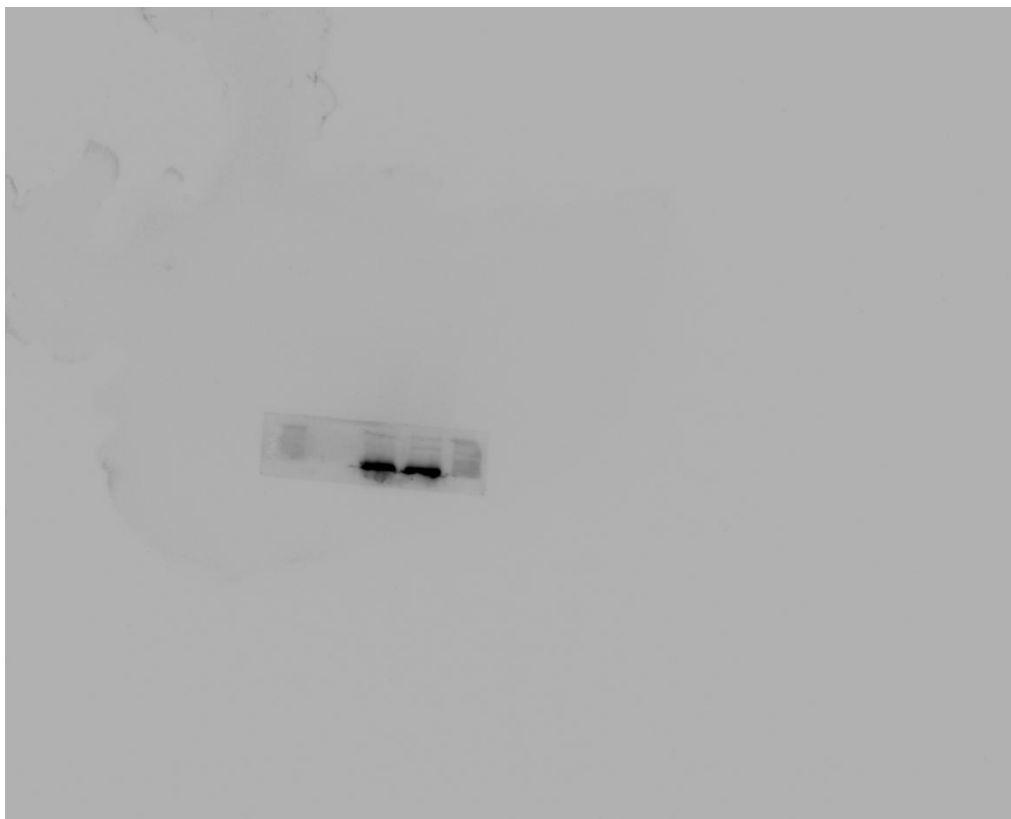

**Fig1G**

**FBXO7<sup>me</sup>-IP**

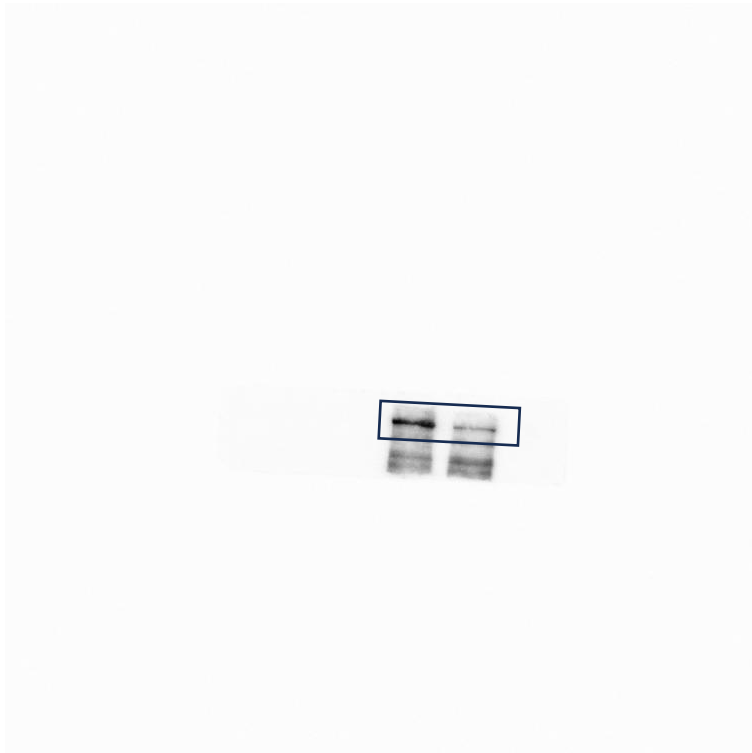

**FBXO7-IP**

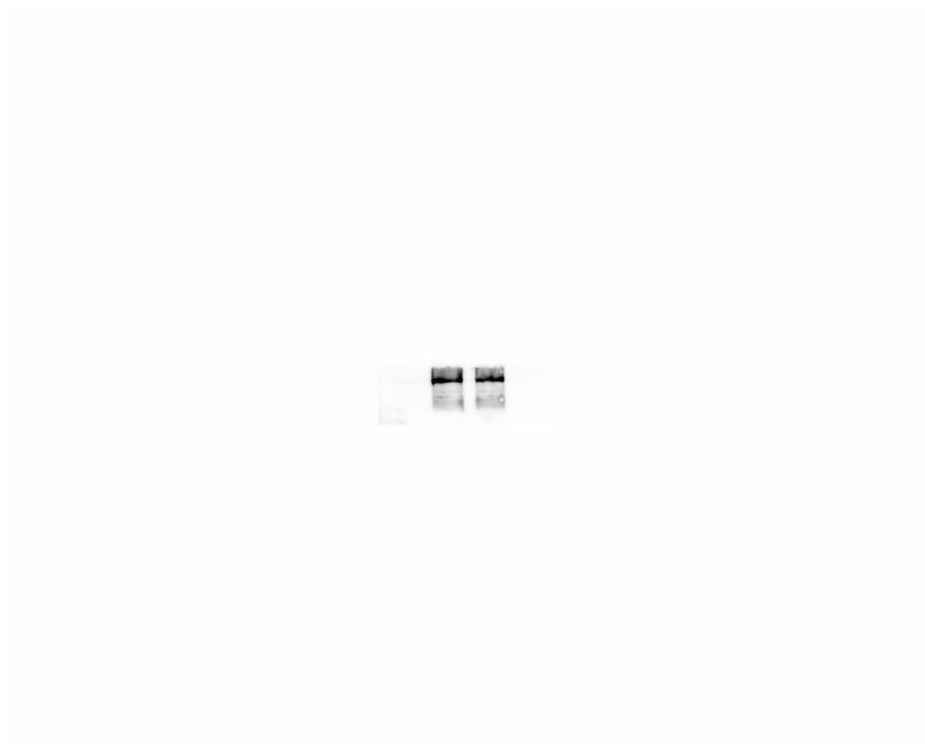

**FBXO7-Input**

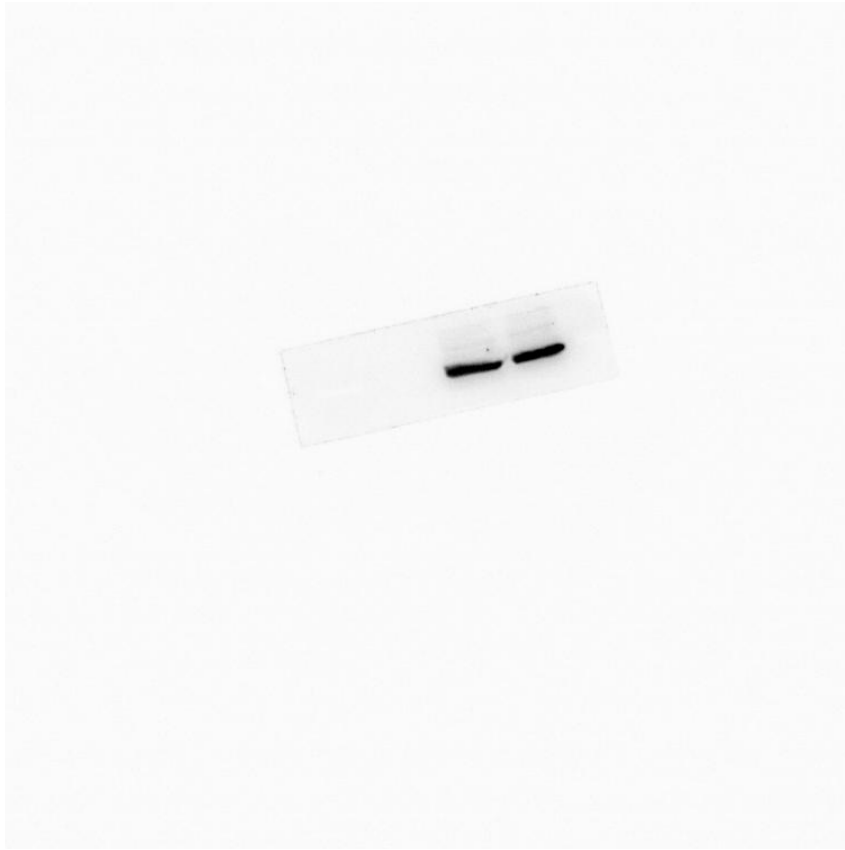

**ACTIN-Input**

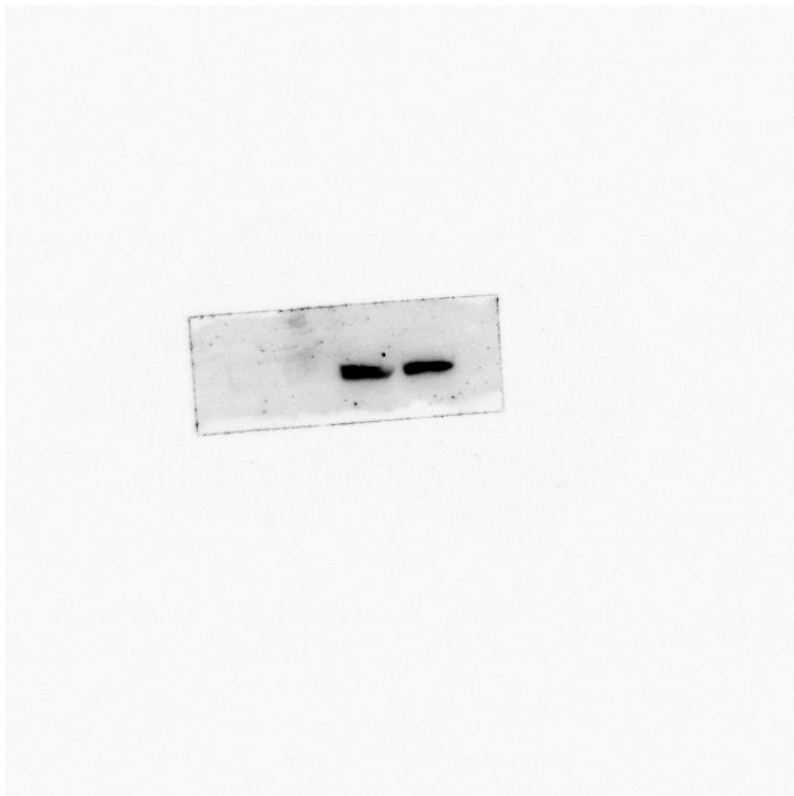

**Fig3A**

**HA-IP**

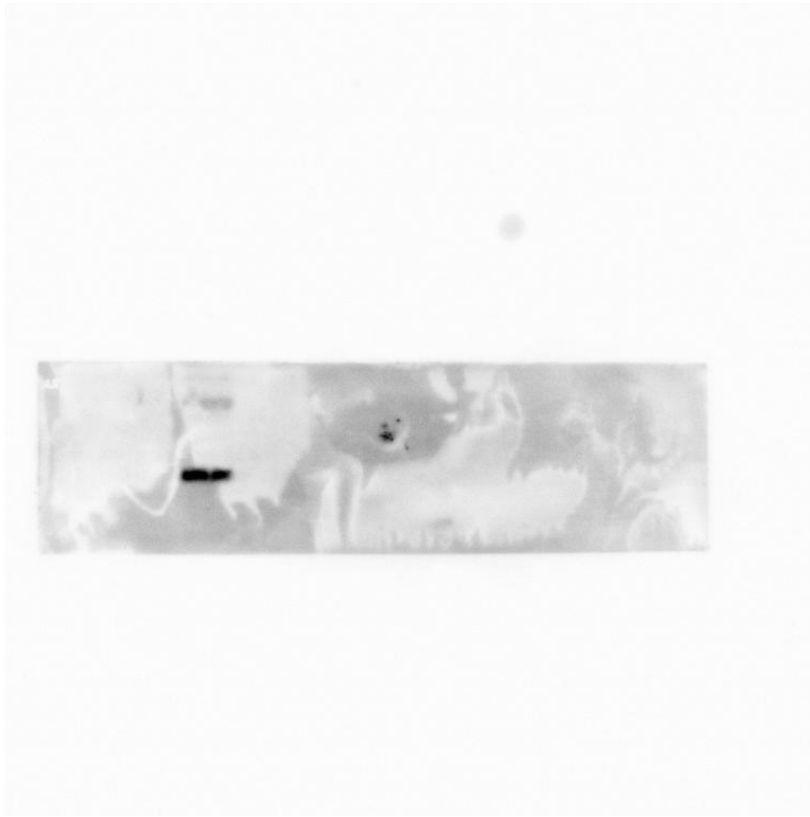

**GFP-IP**

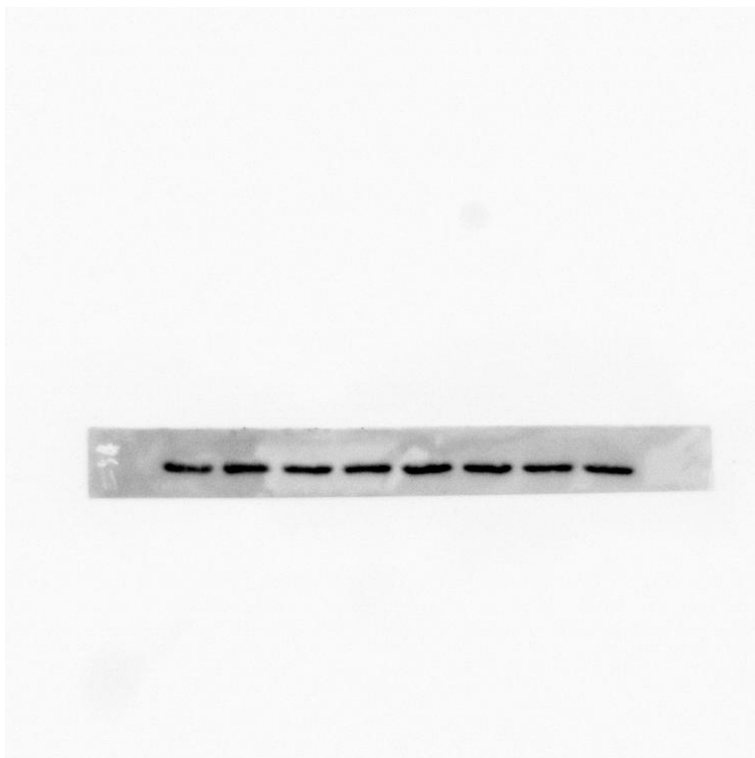

## HA-Input

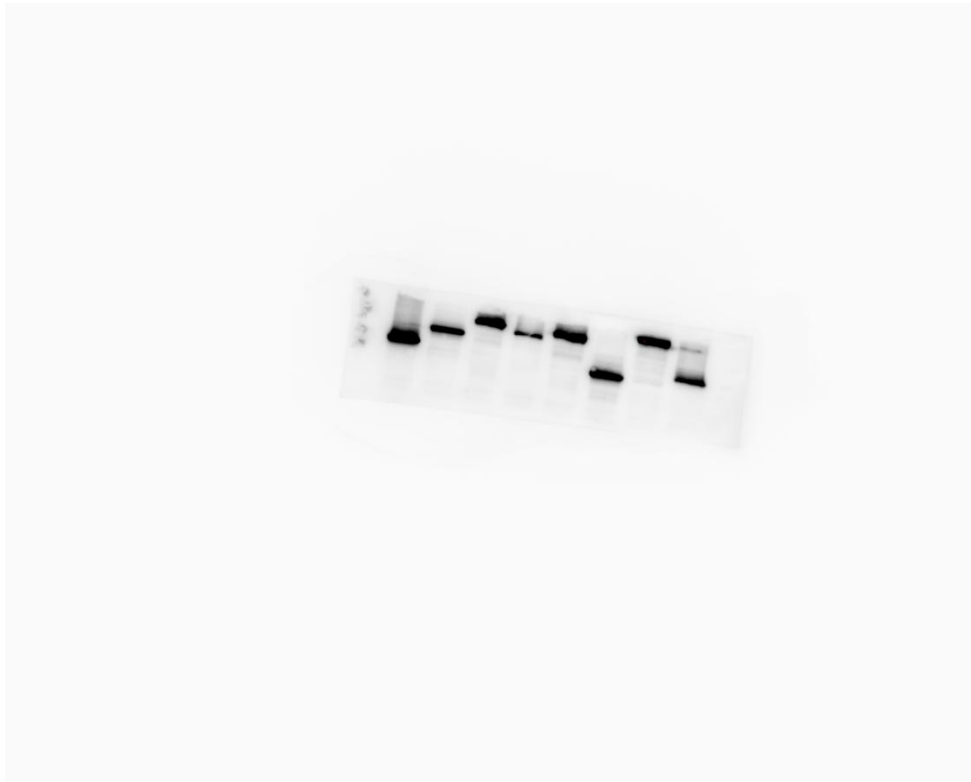

## GFP-Input

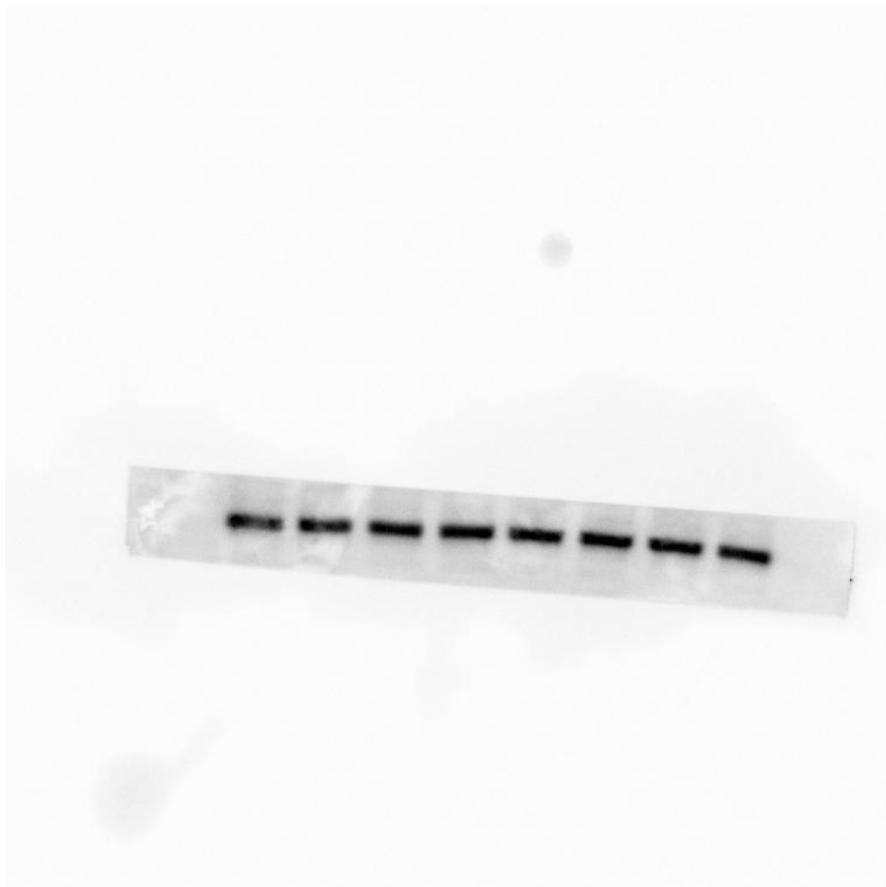

**Fig3B**

**HA-IP**

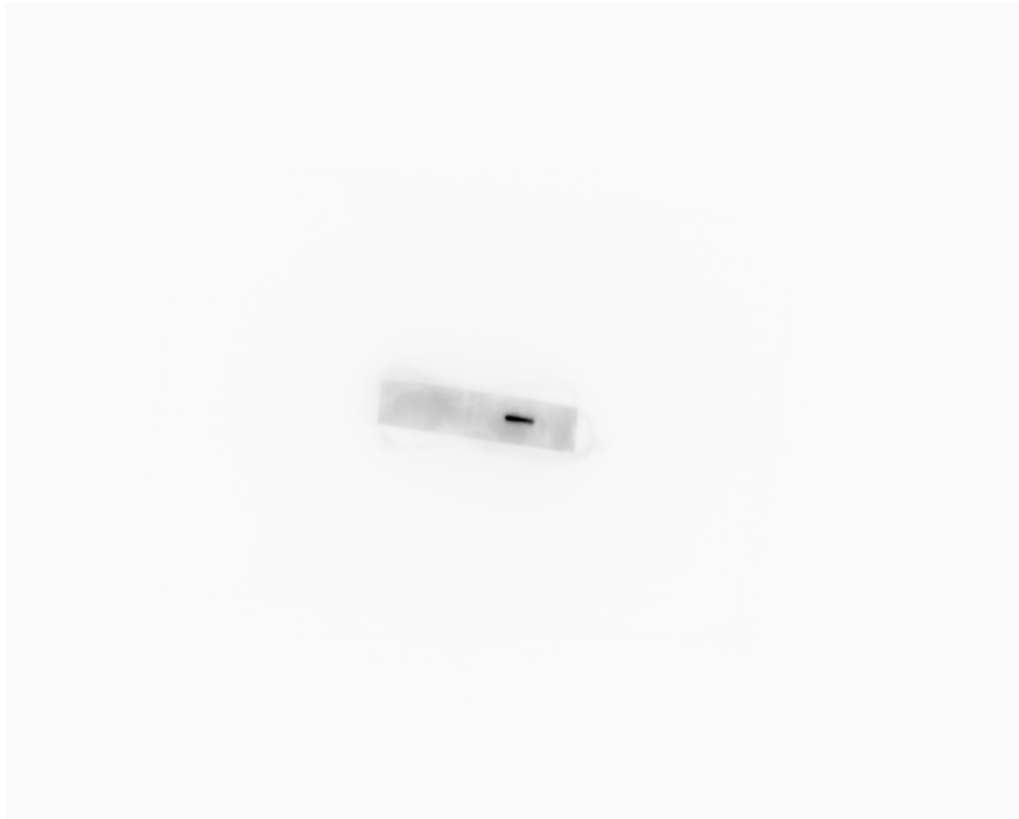

**GFP-IP**

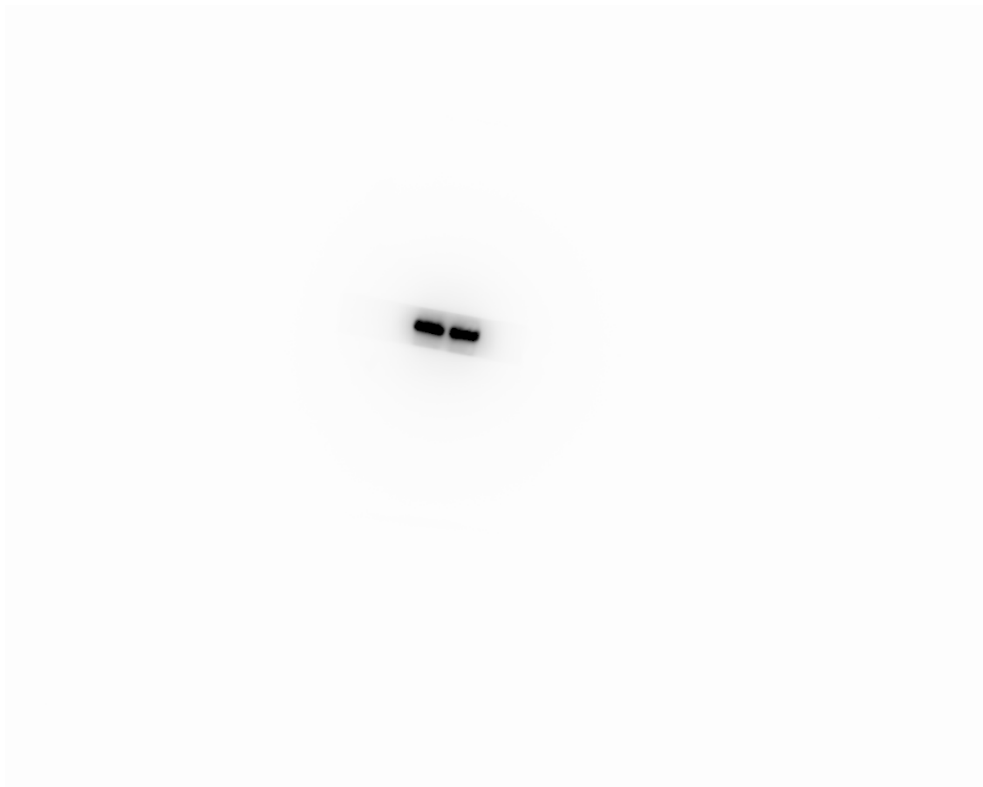

**HA-Input**

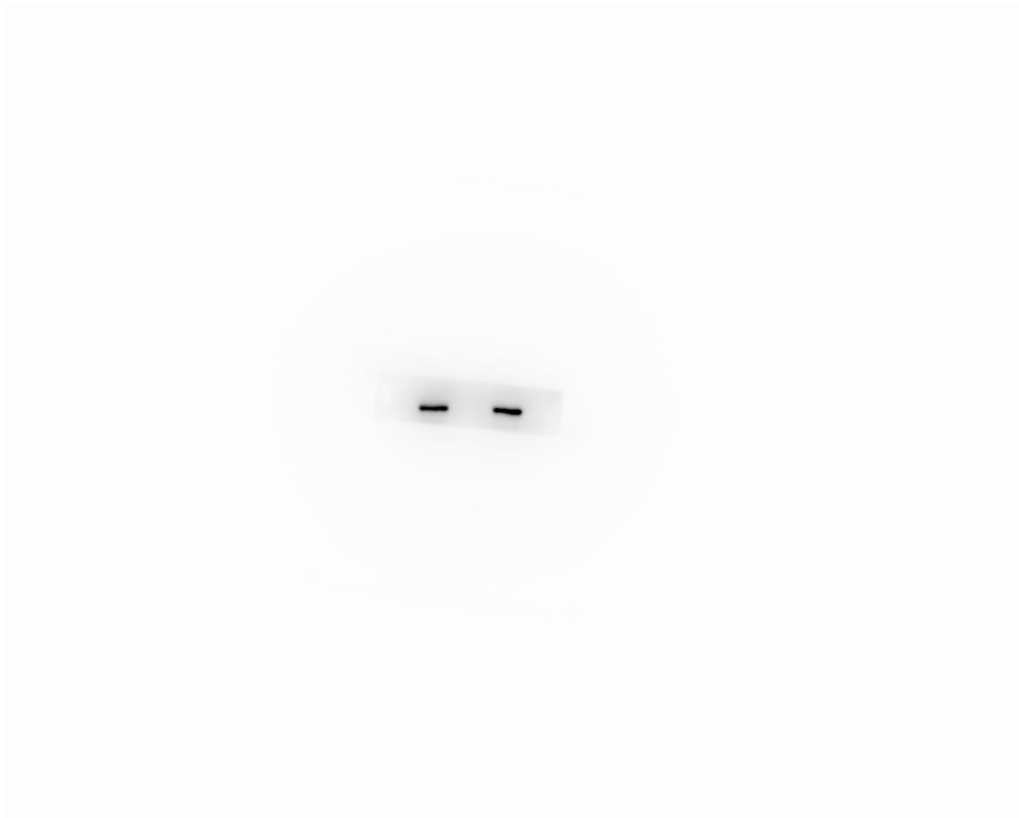

**GFP-Input**

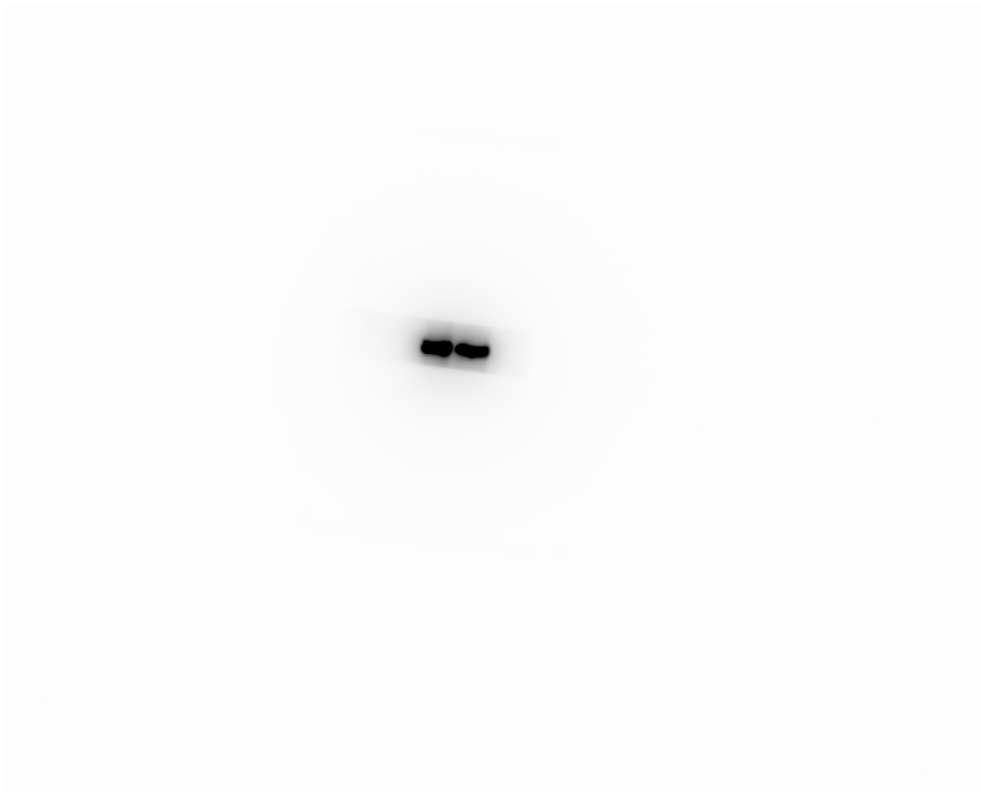

**GADPH-Input**

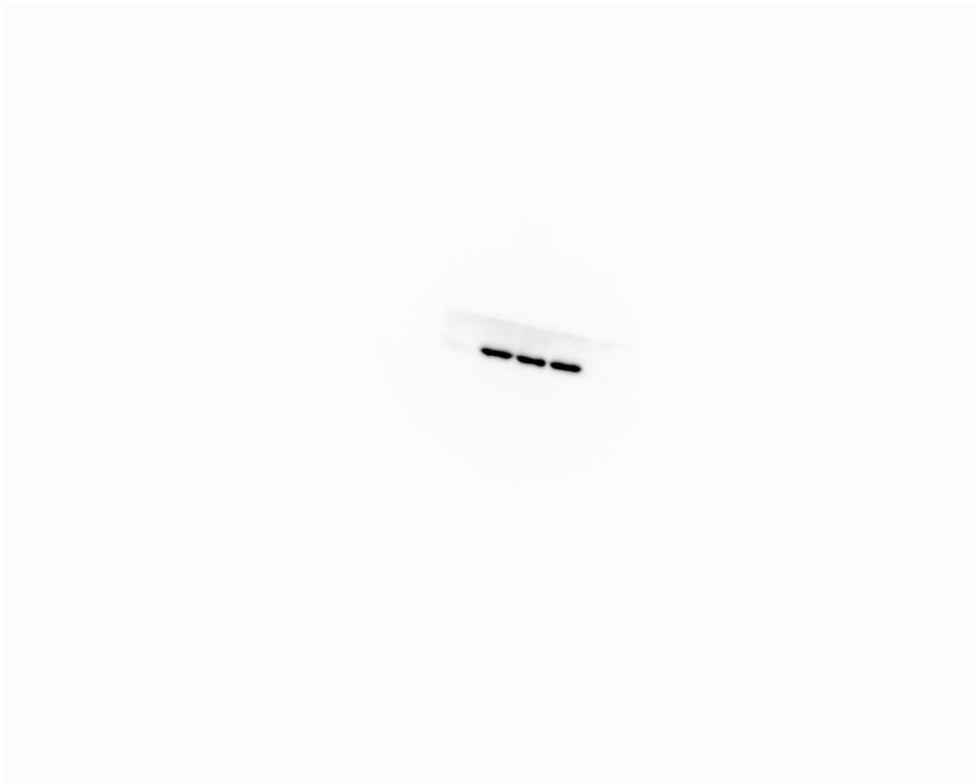

**Fig3C**

**PRMT2**

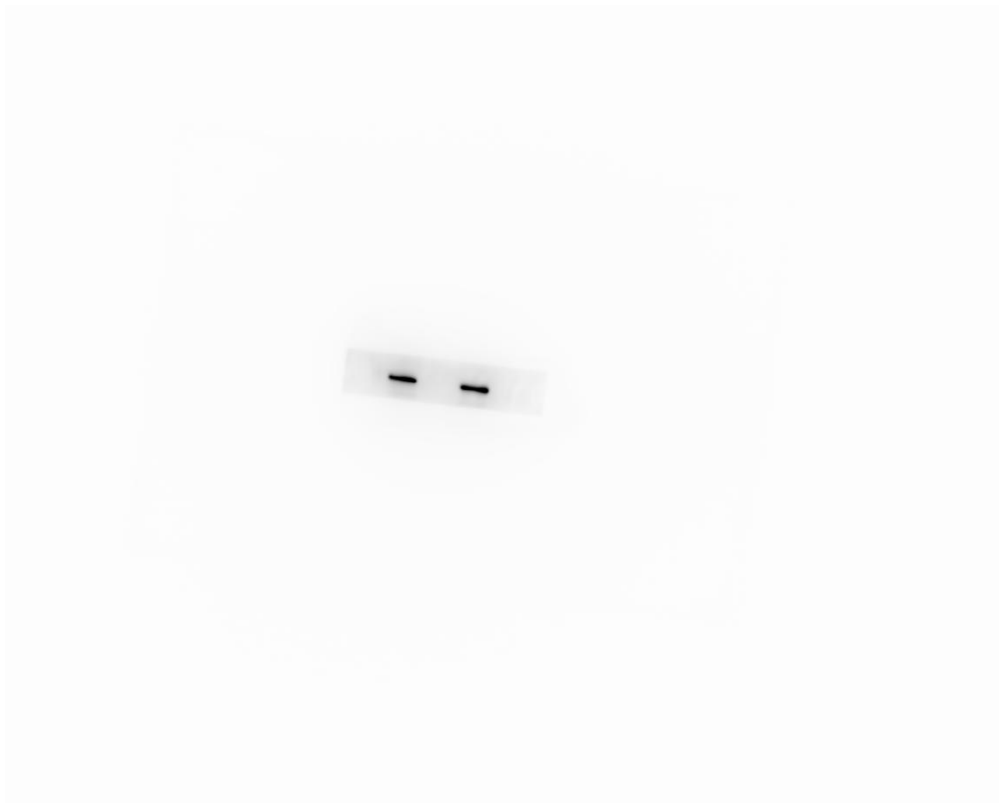

**FBXO7**

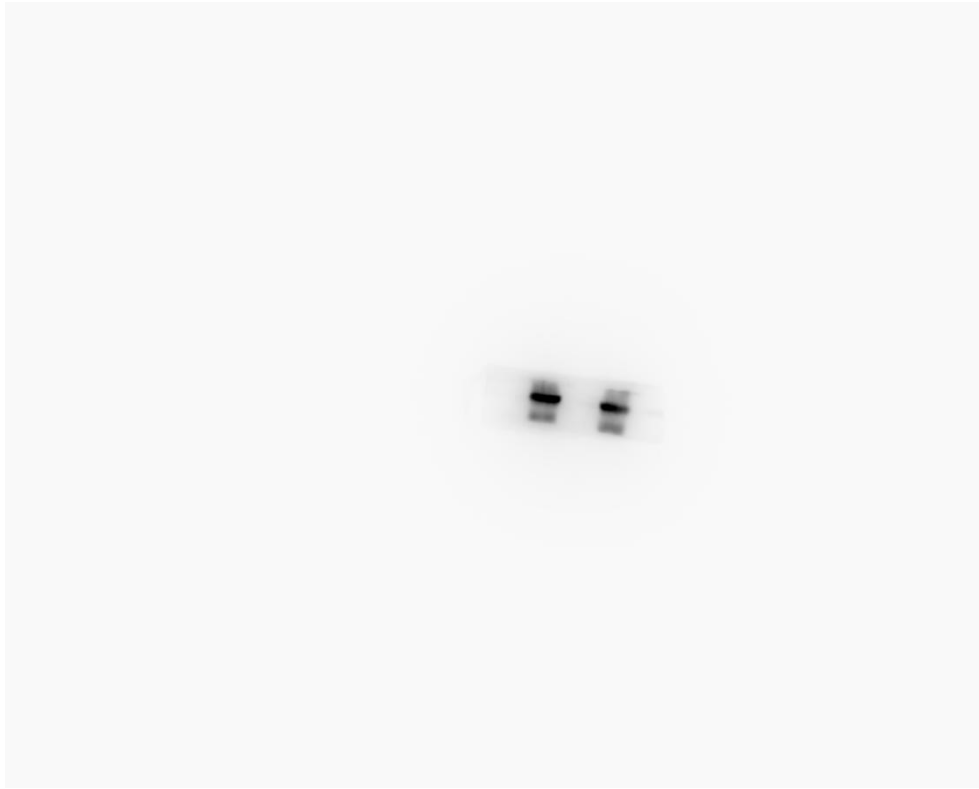

**PRMT2**

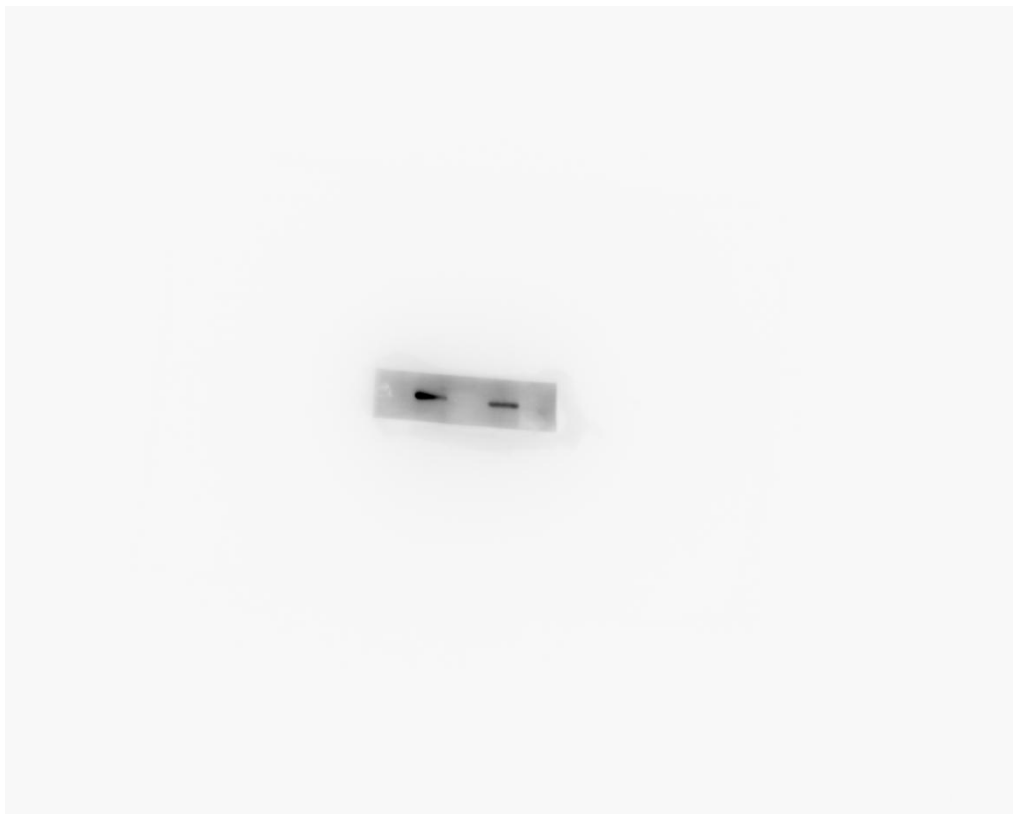

**FBXO7**

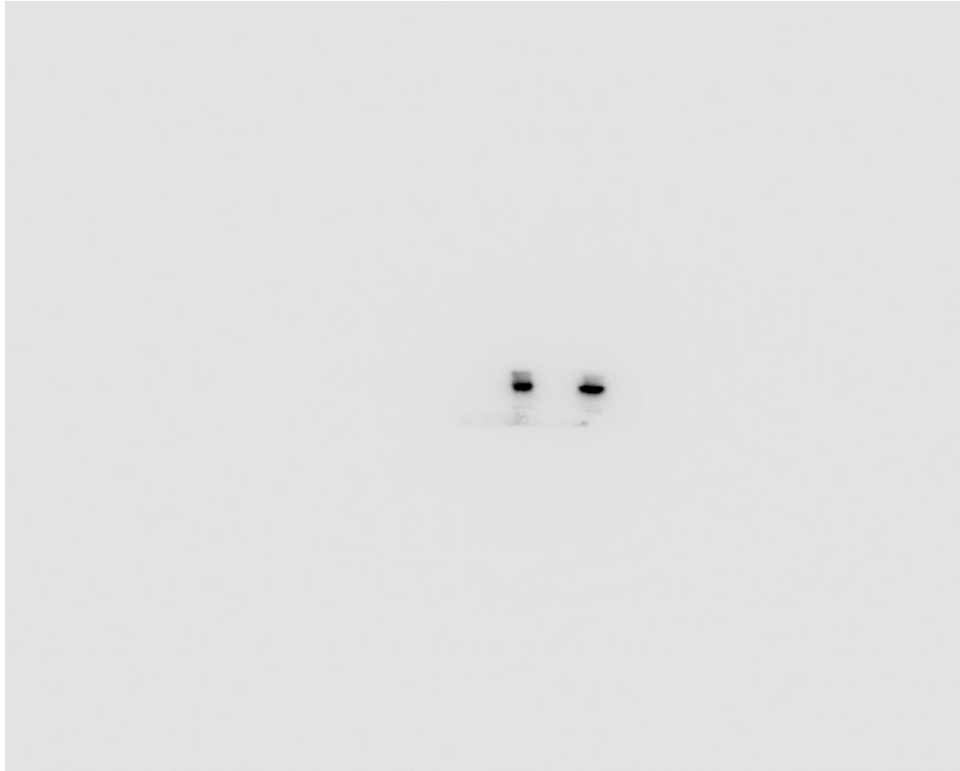

**Fig3D**

**GFP-IP**

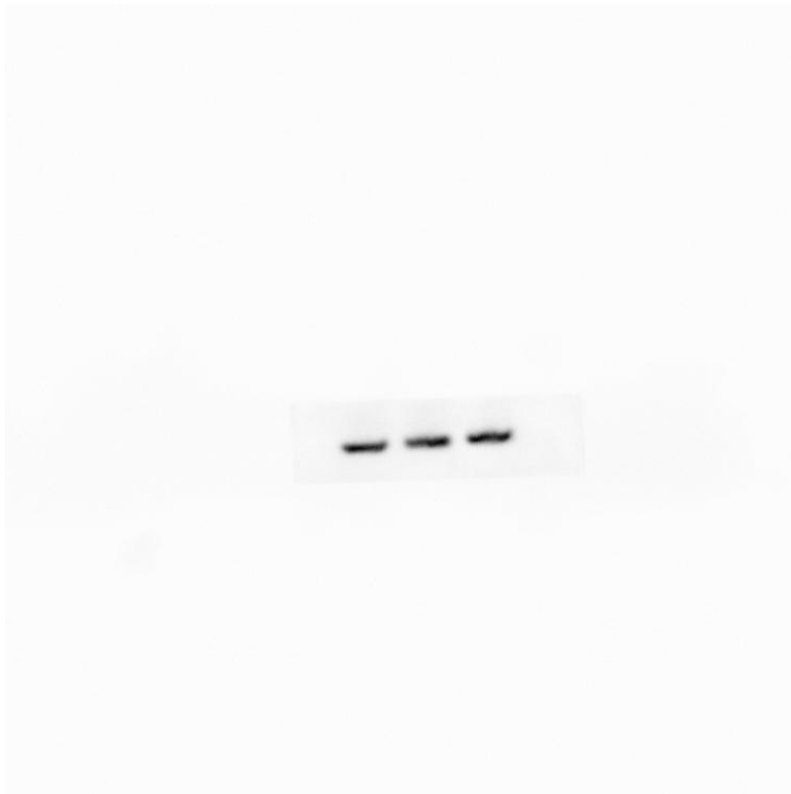

## HA-IP

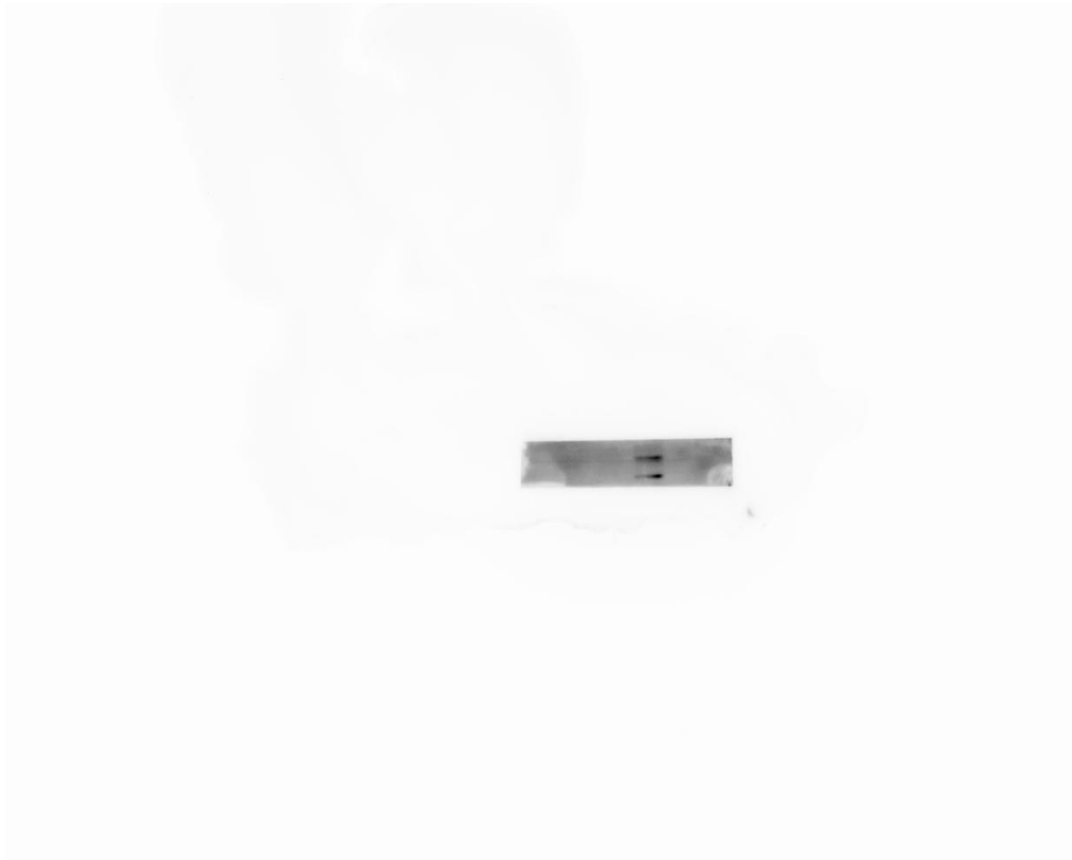

## GFP-Input

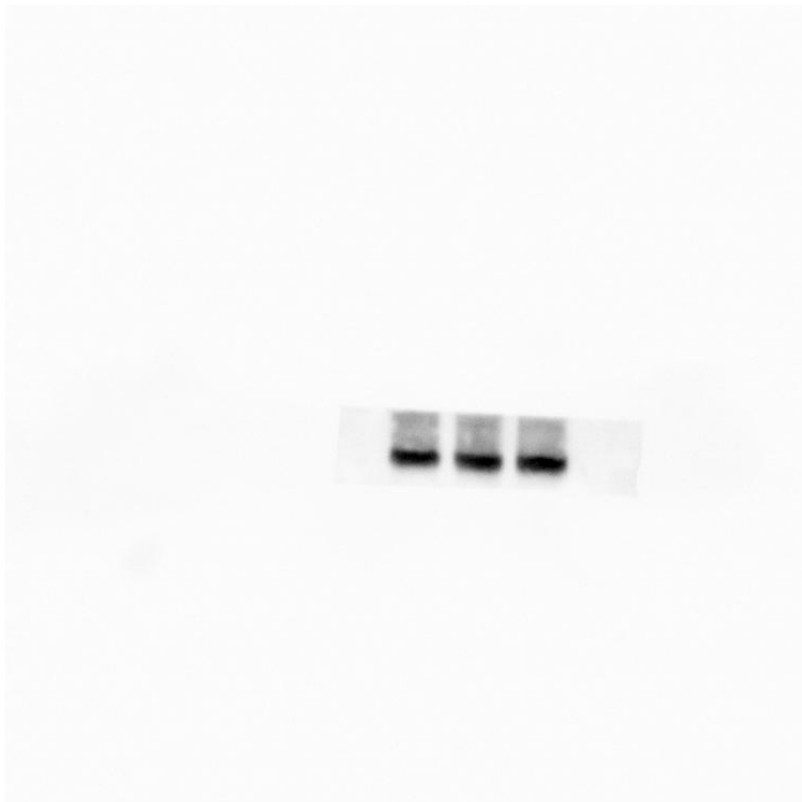

**HA-Input**

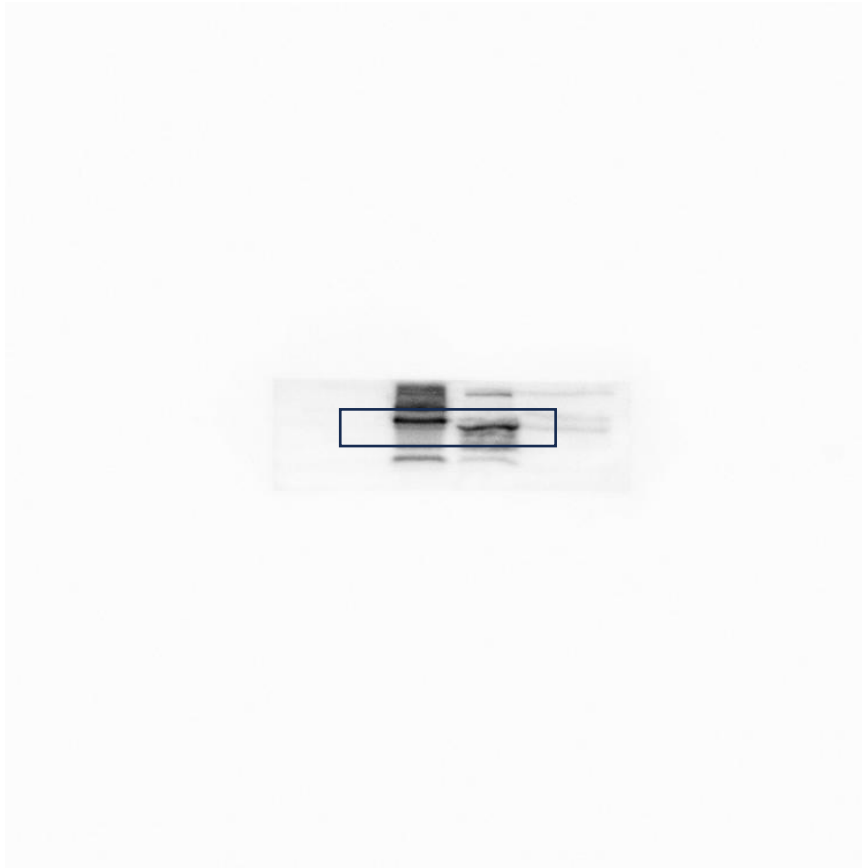

**GAPDH-Input**

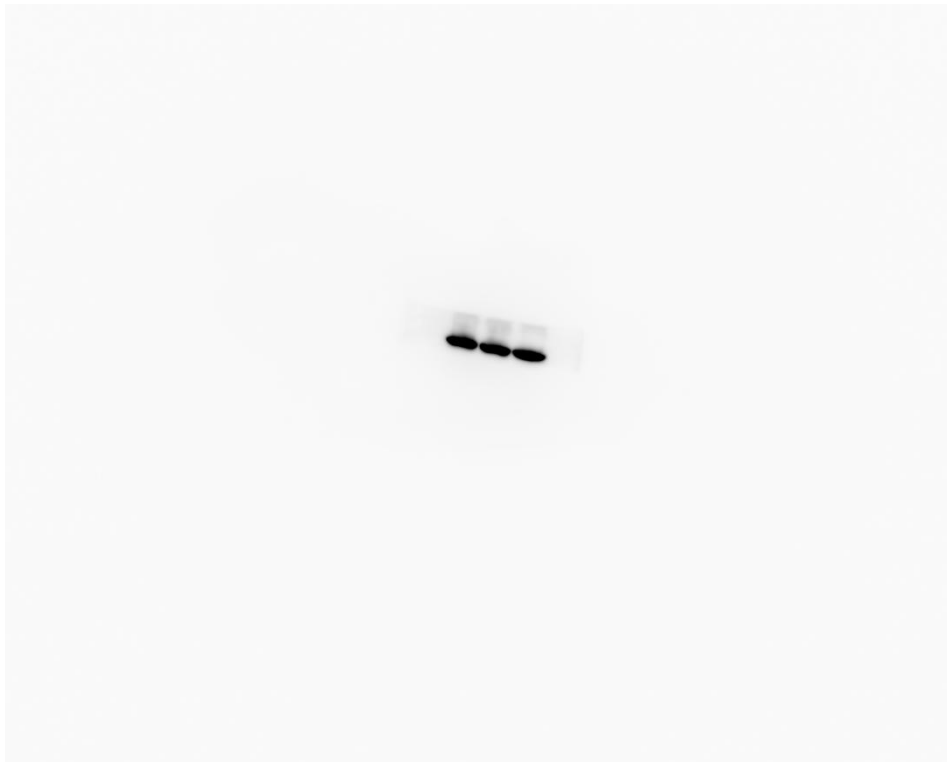

**Fig3E**

**MMA-IP**

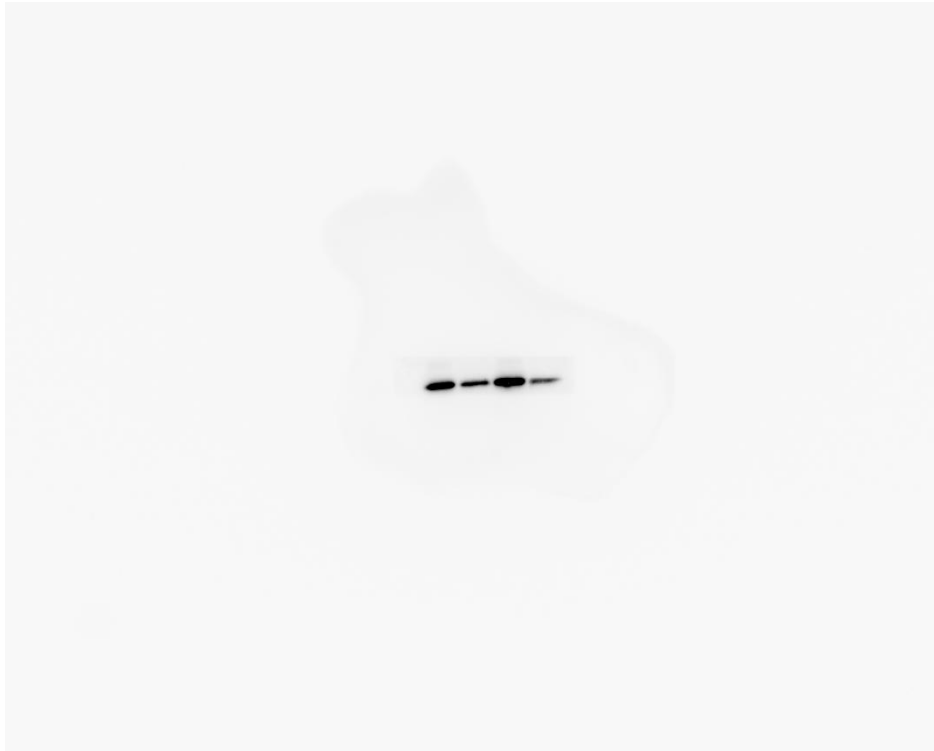

**GFP-IP**

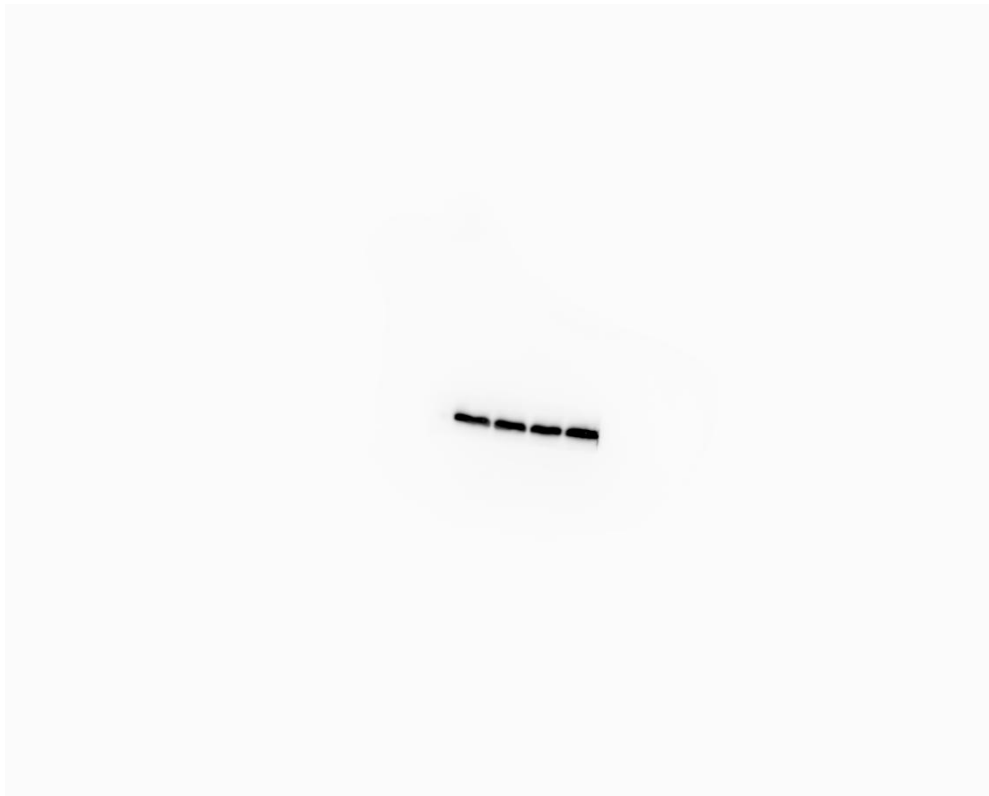

**GFP-Input**

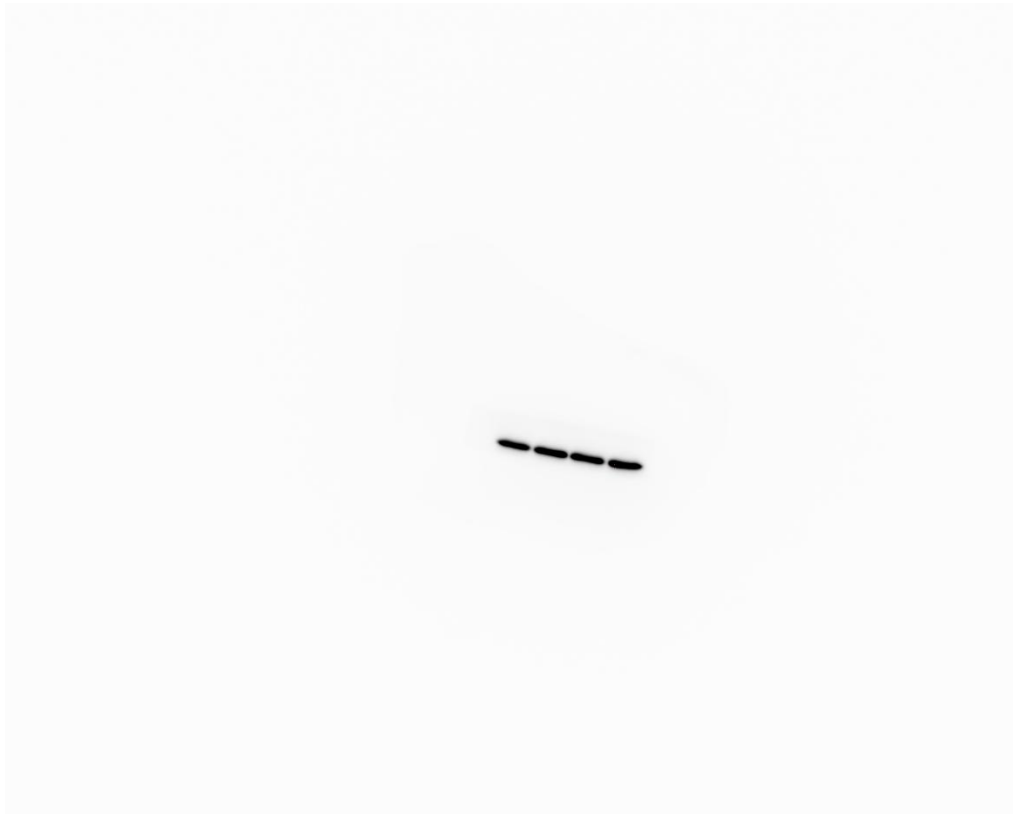

**ACTIN-Input**

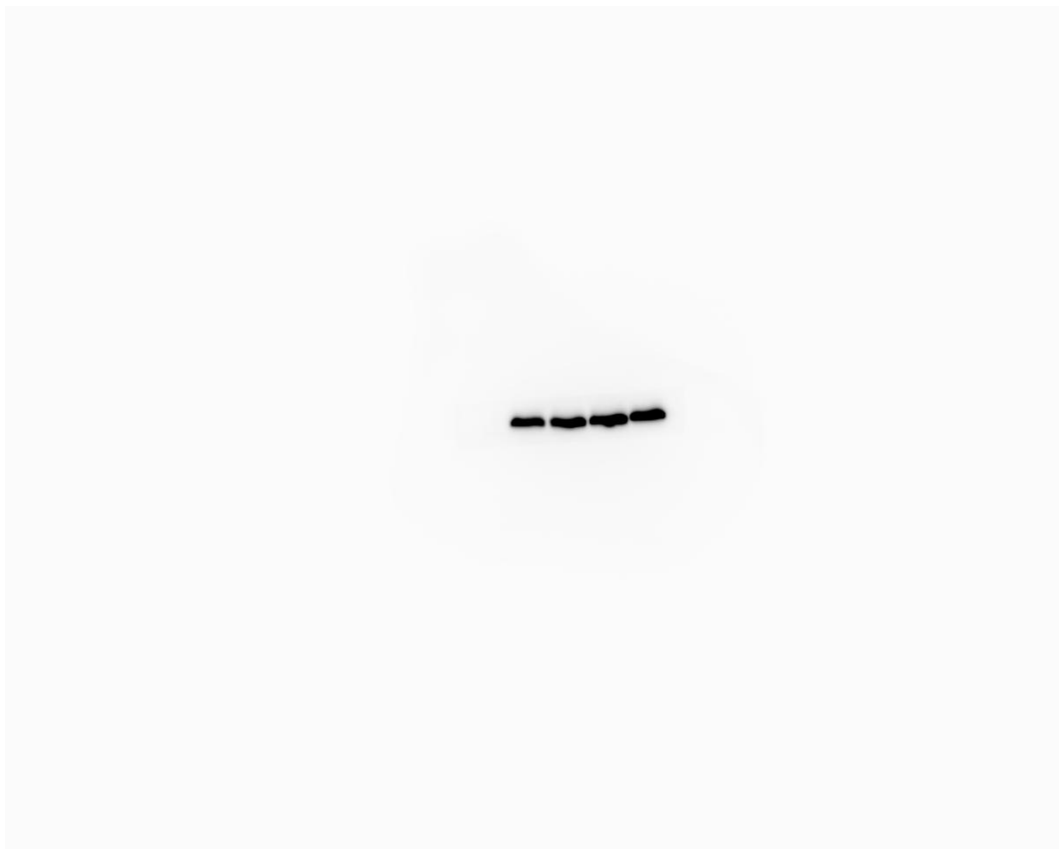

**Fig3F**

**MMA-IP**

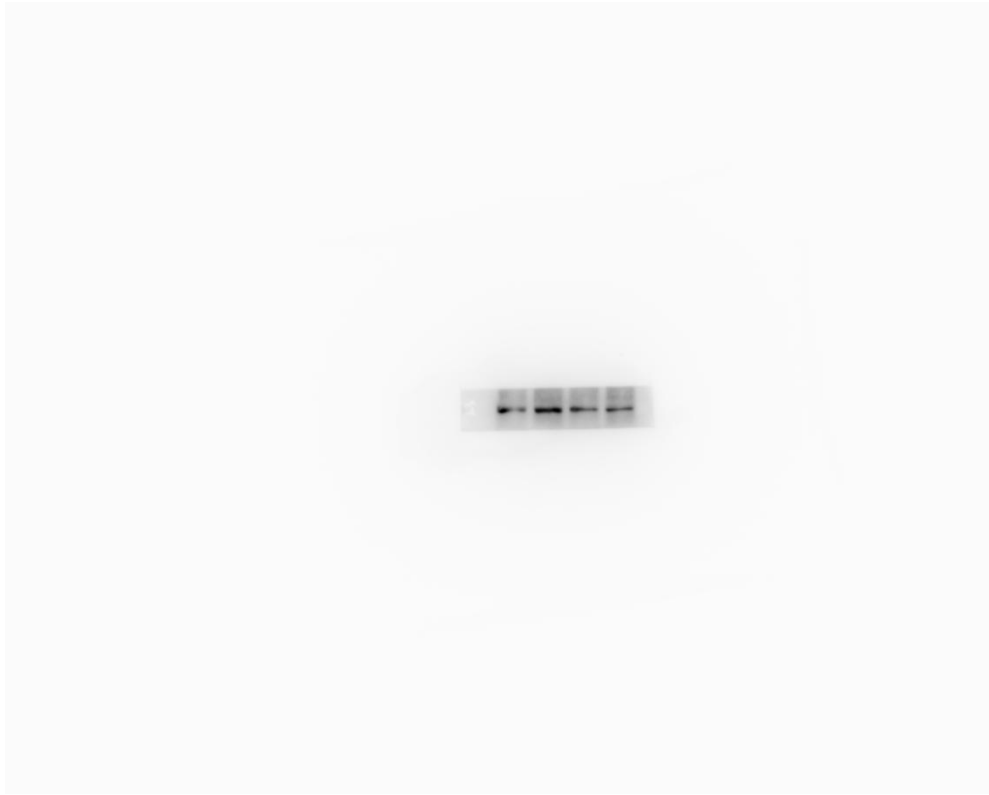

**GFP-IP**

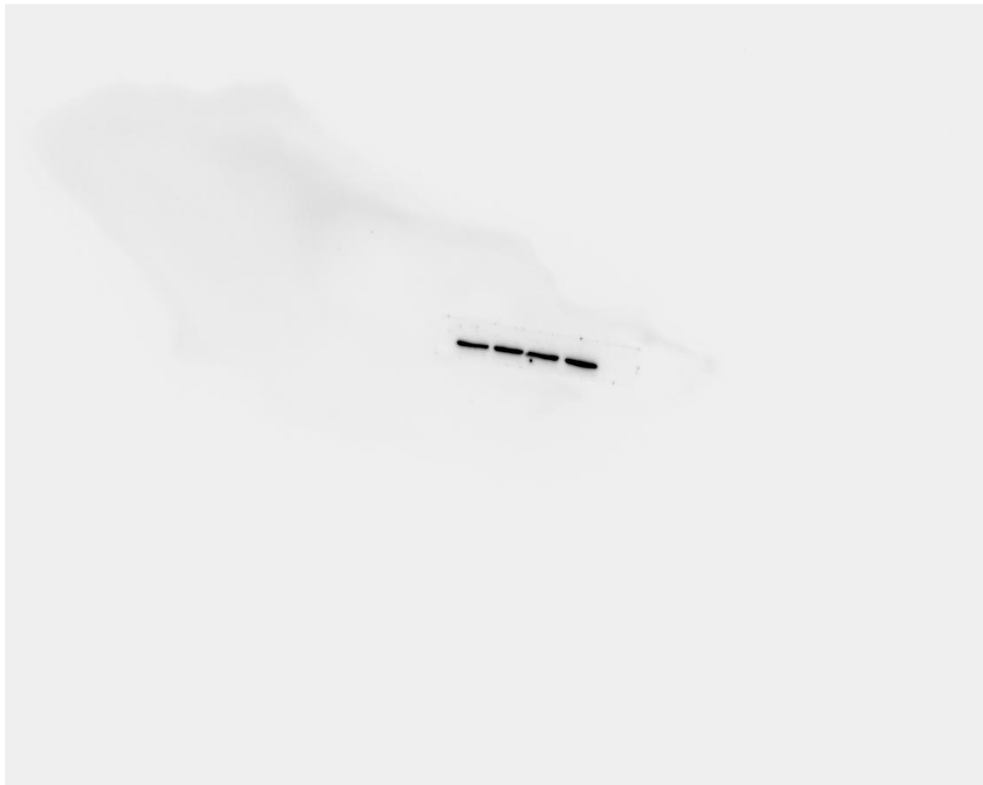

**HA-Input**

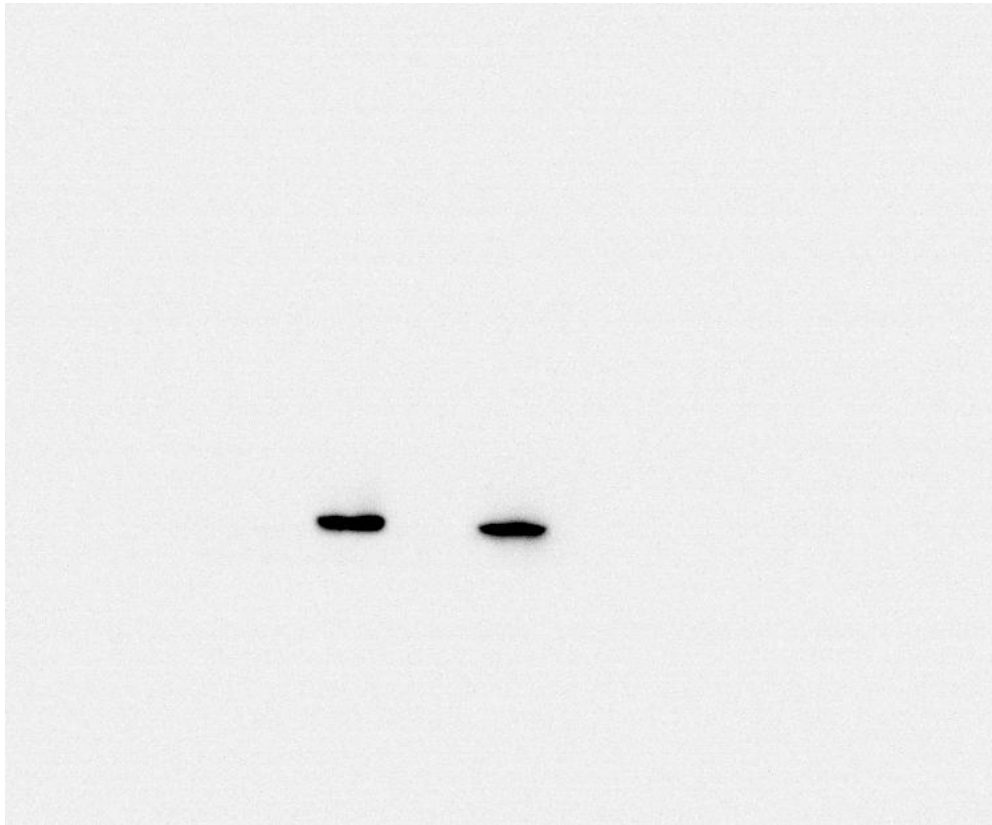

**GFP-Input**

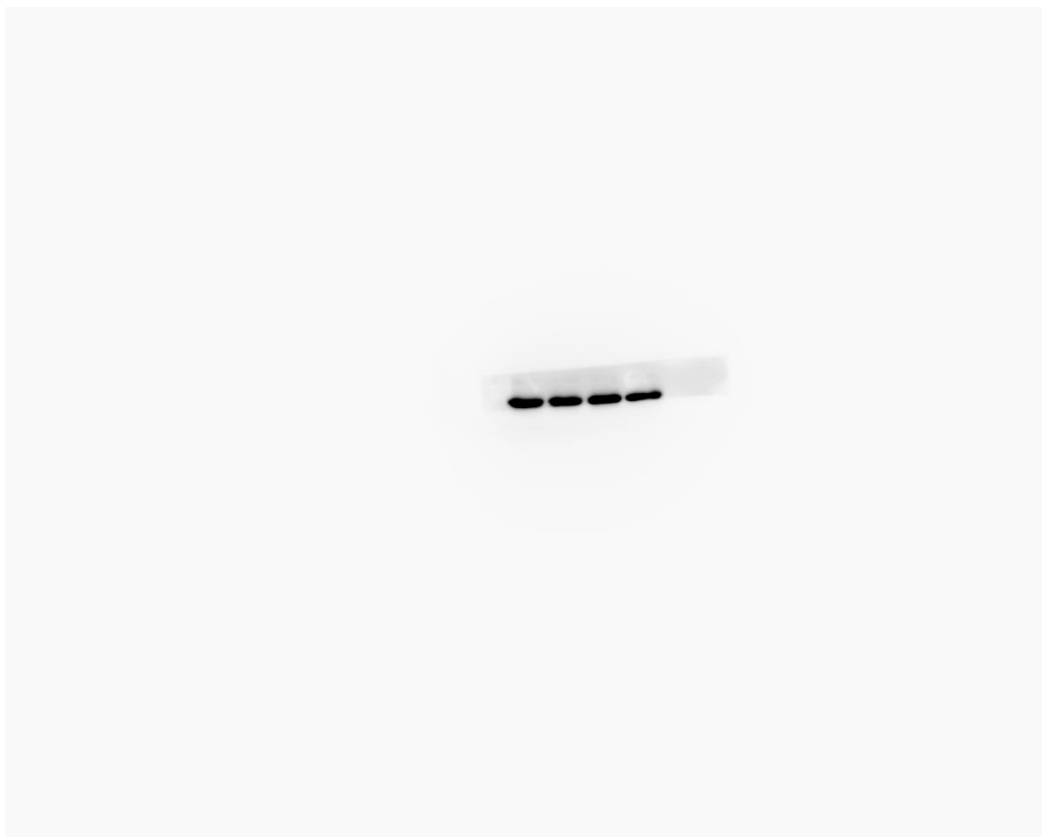

**ACTIN-Input**

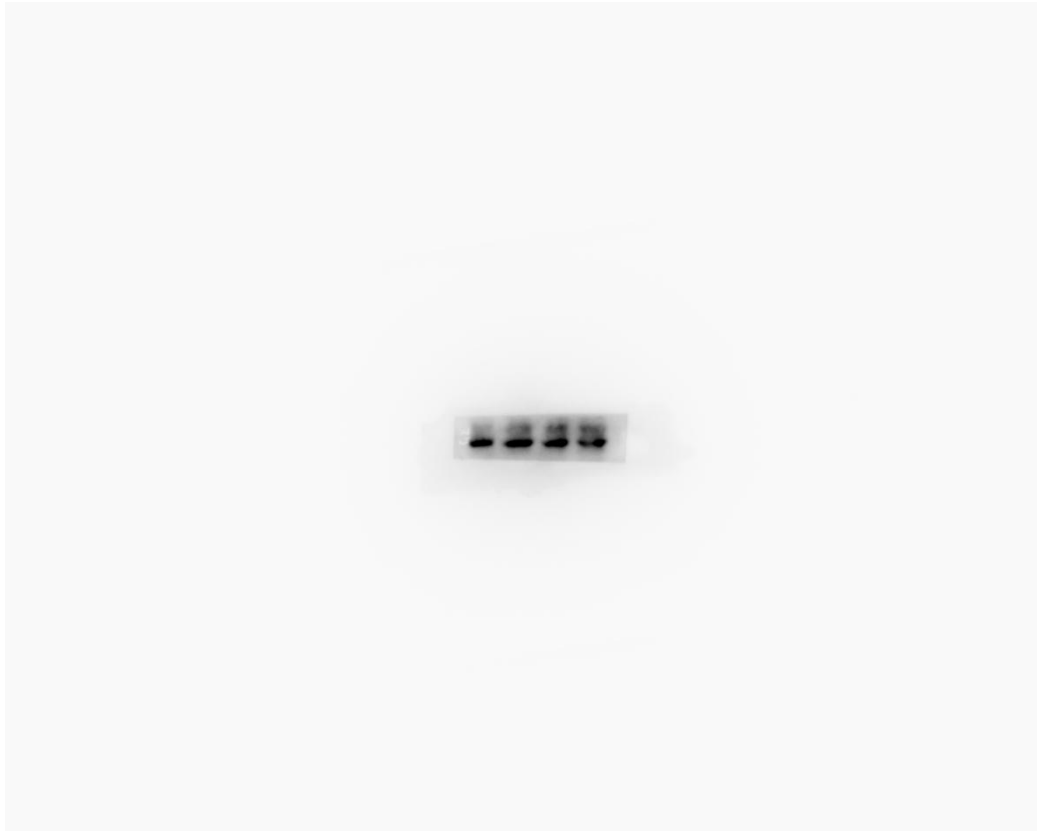

**Fig4B**

**MED12**

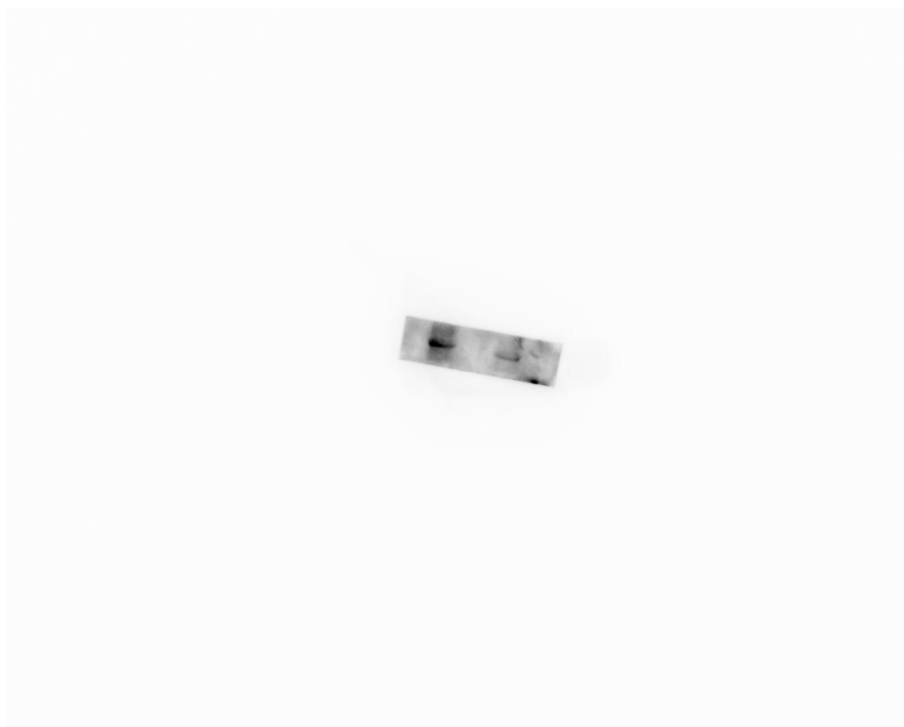

**FBXO7**

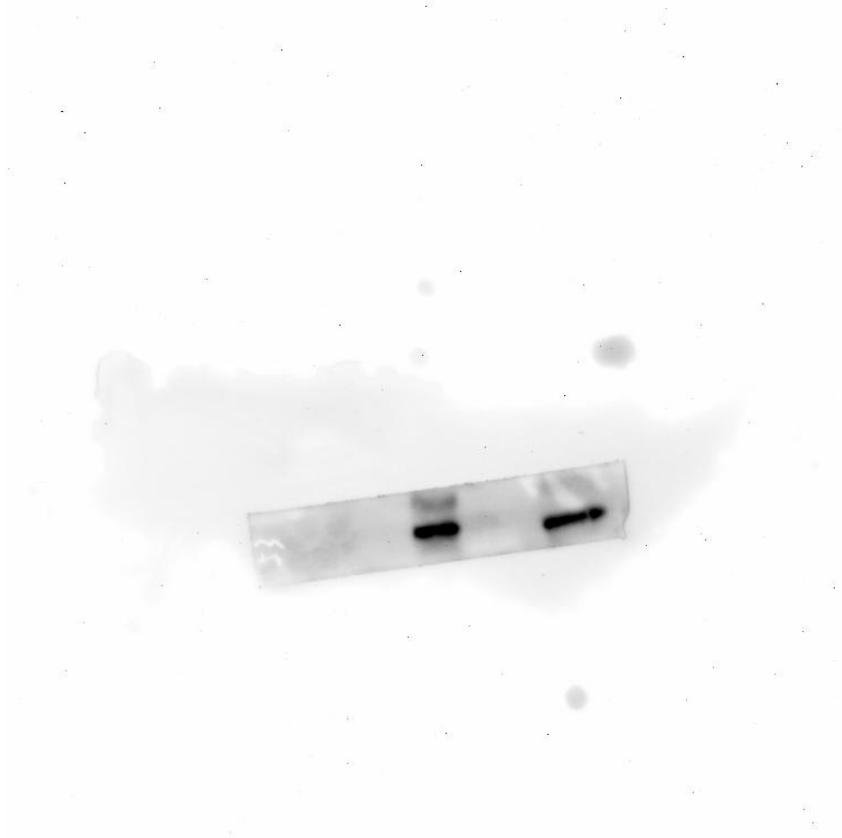

**MED12**

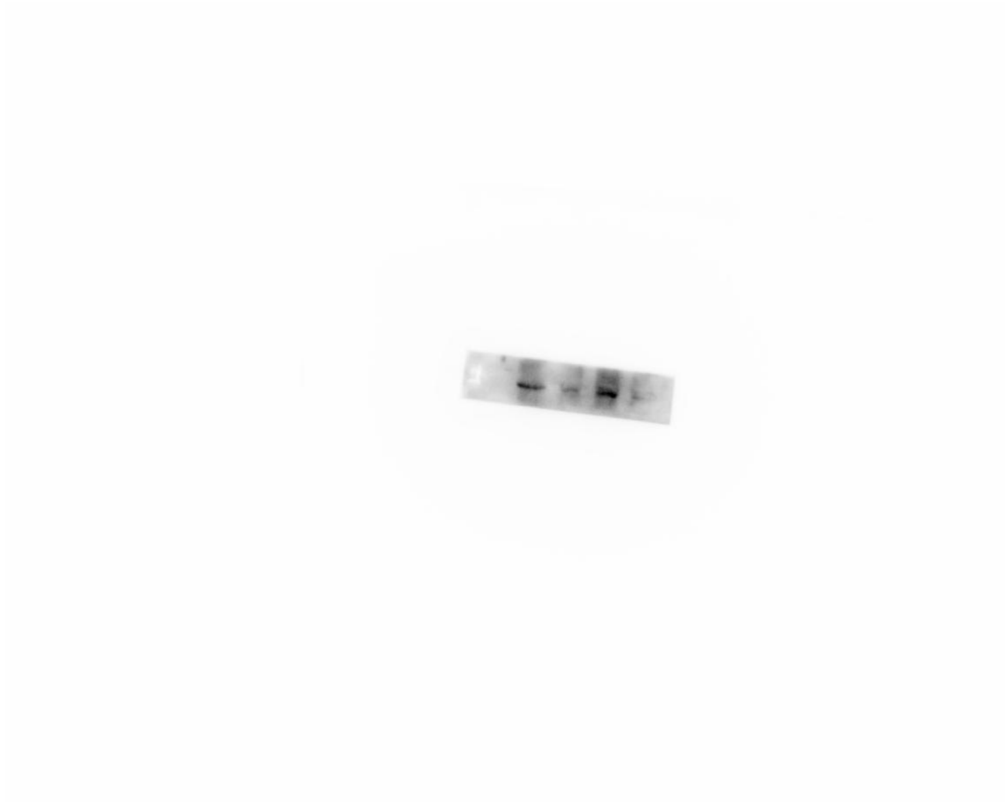

**FBXO7**

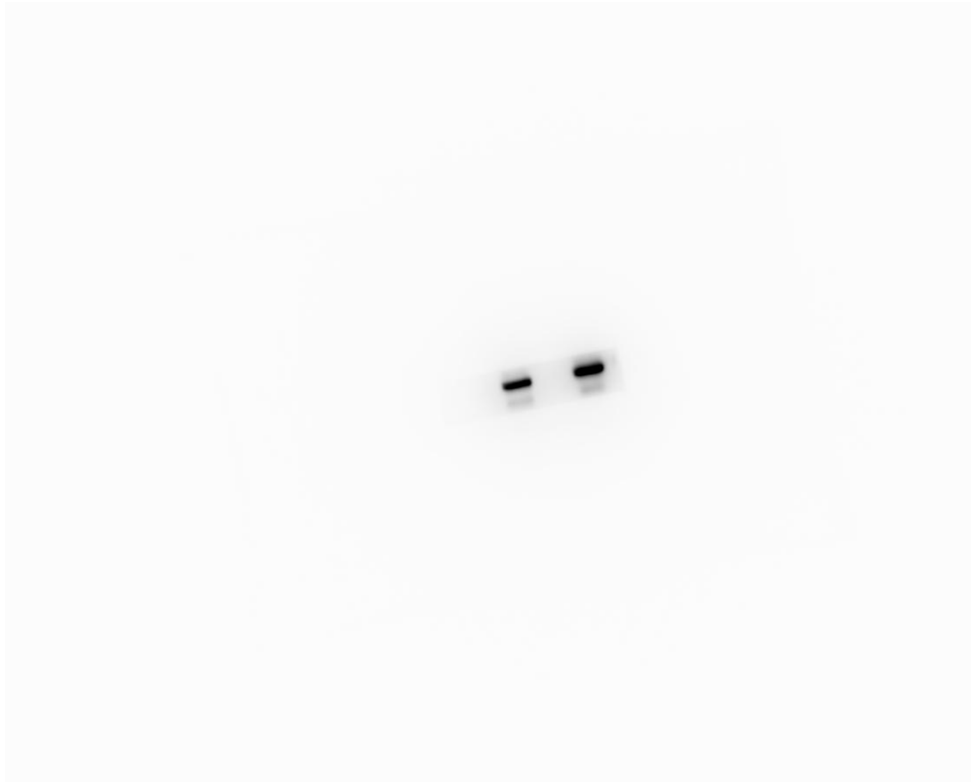

**Fig4C**

**Flag-IP**

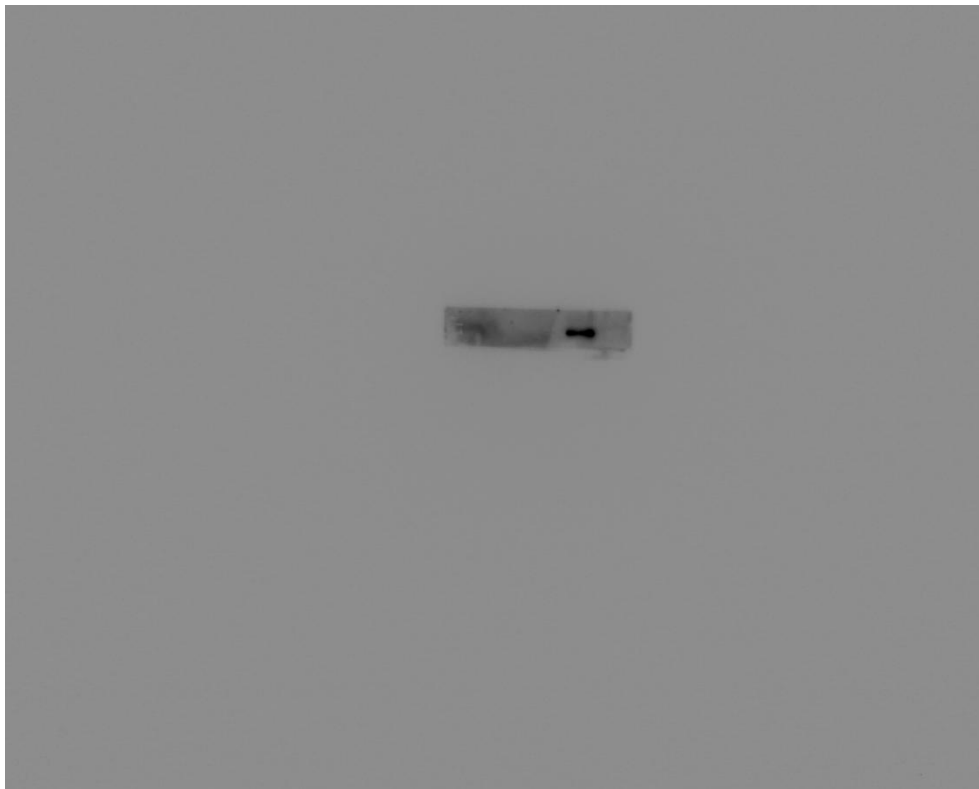

## GFP-IP

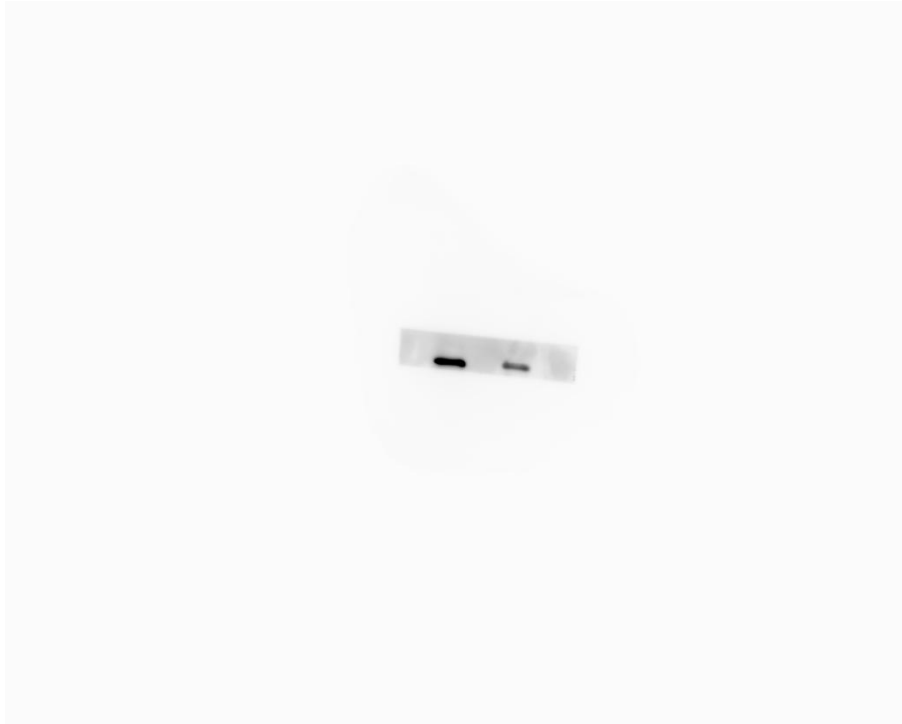

## Flag-Input

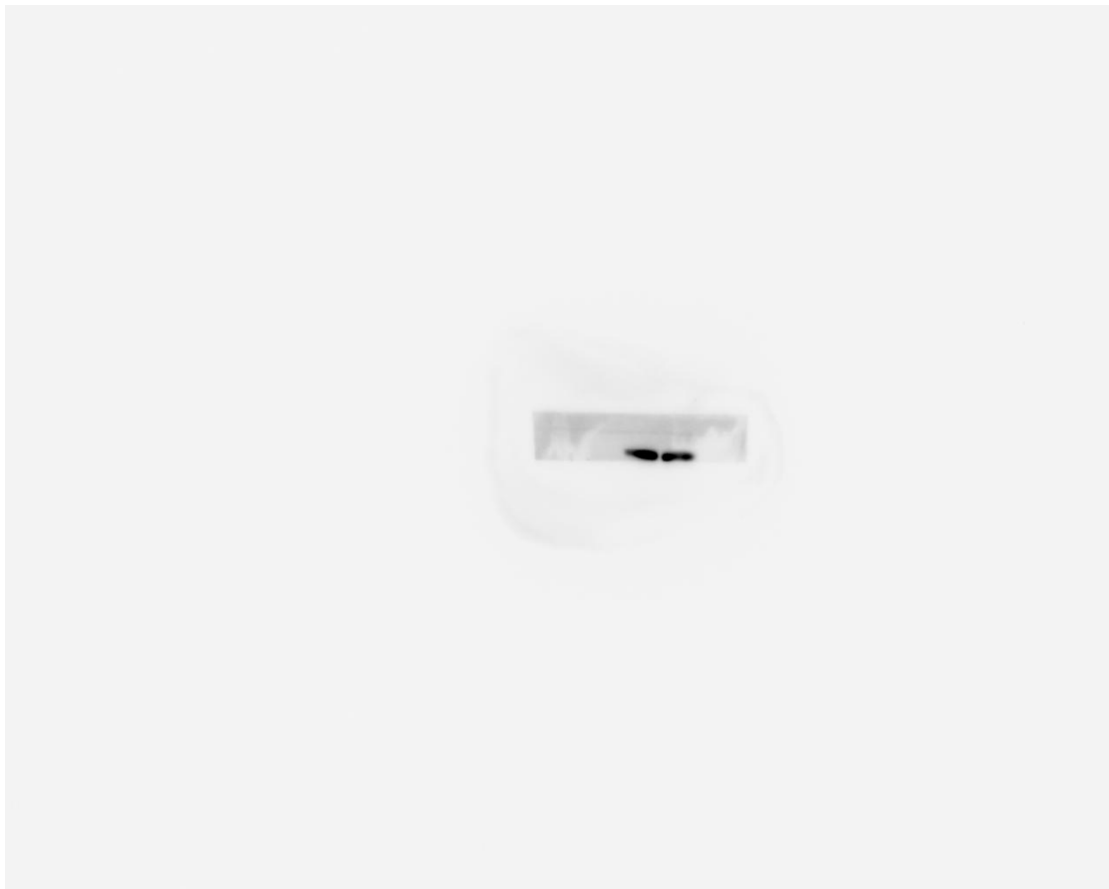

**GFP-Input**

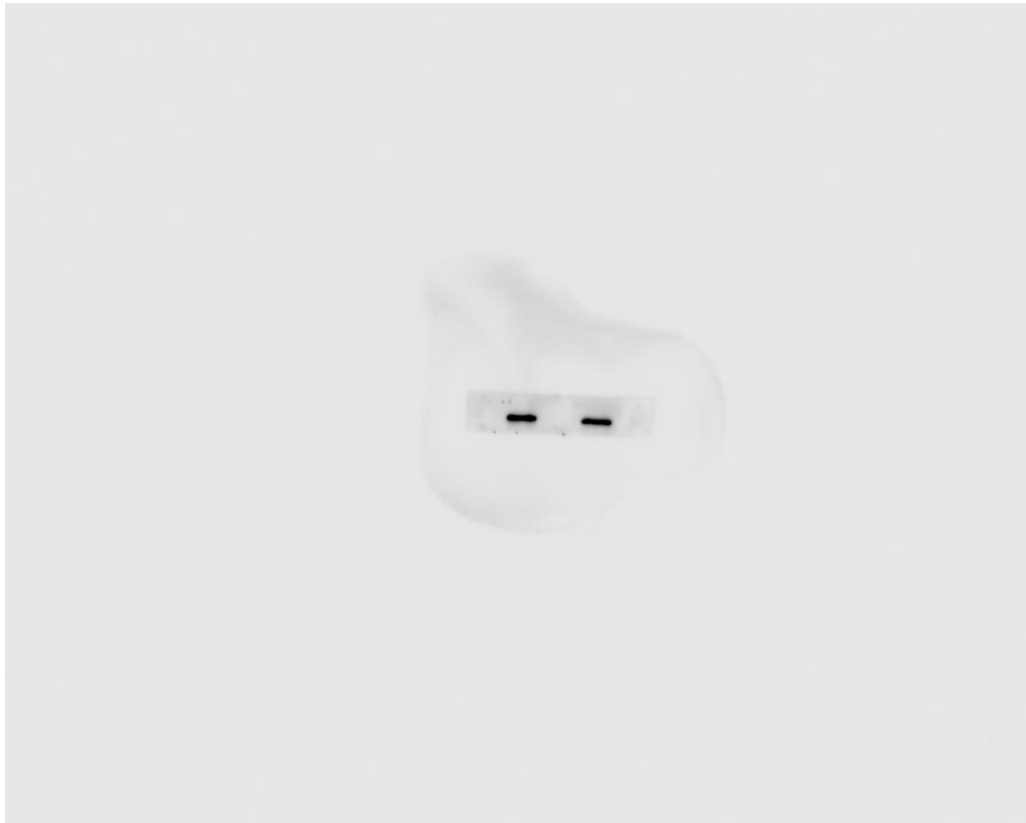

**GAPDH-Input**

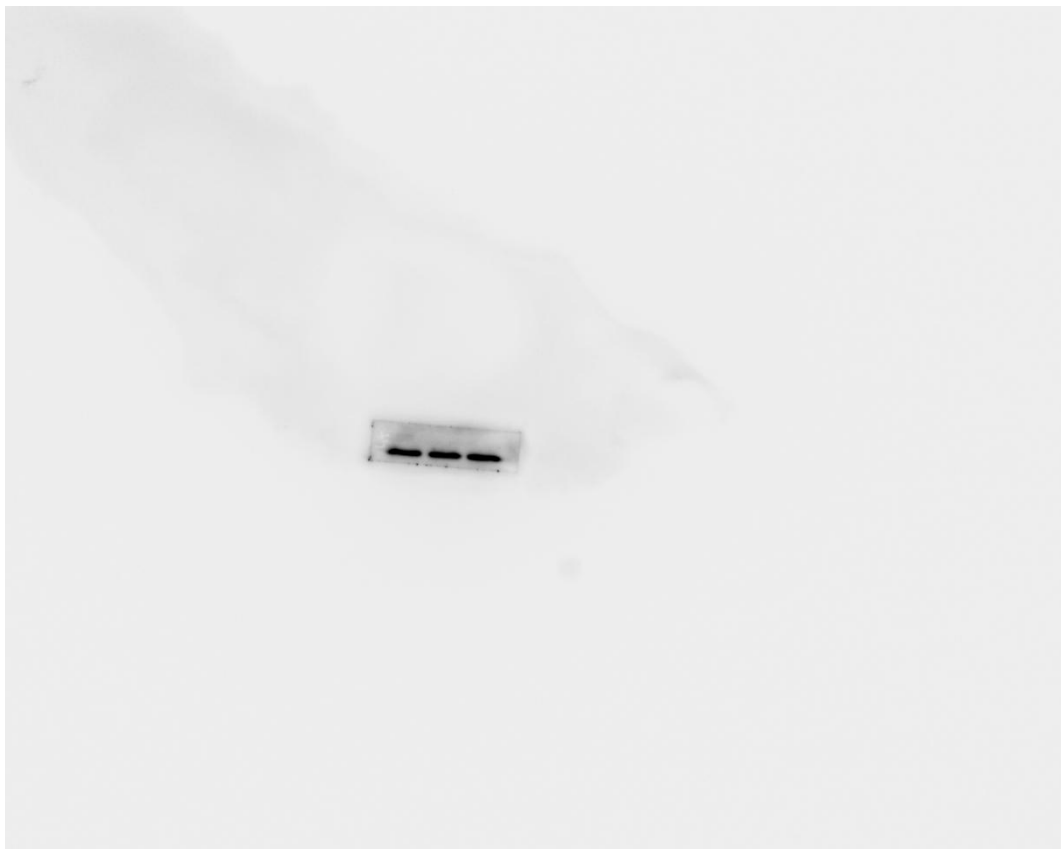

**Fig4D**

**Flag-IP**

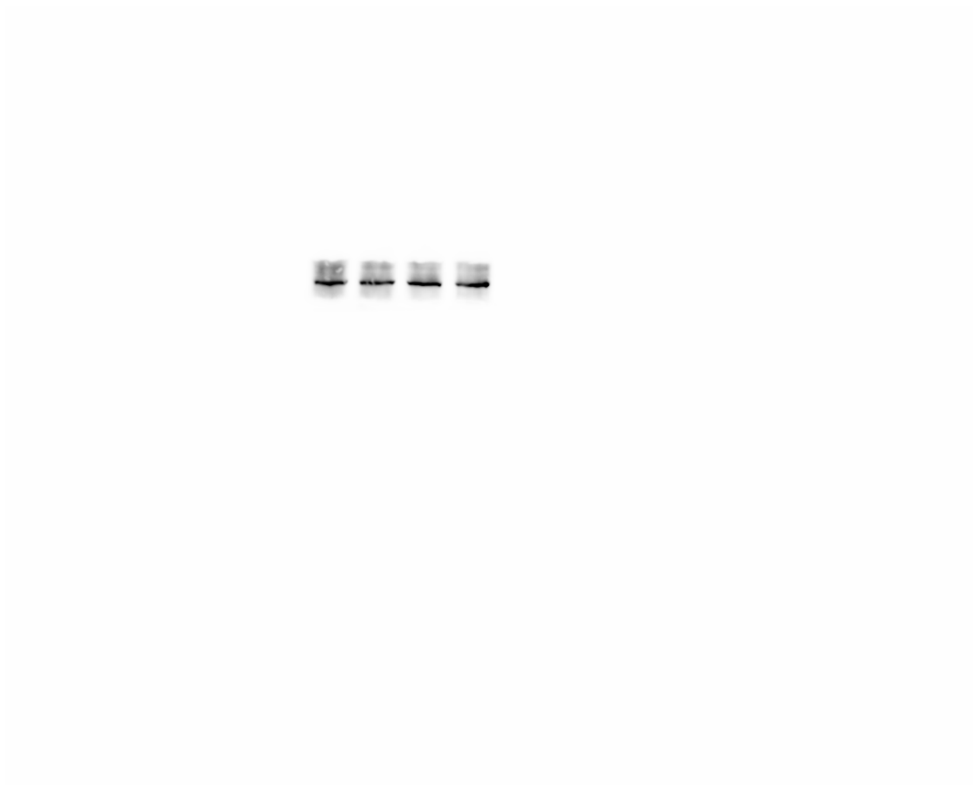

**GFP-IP**

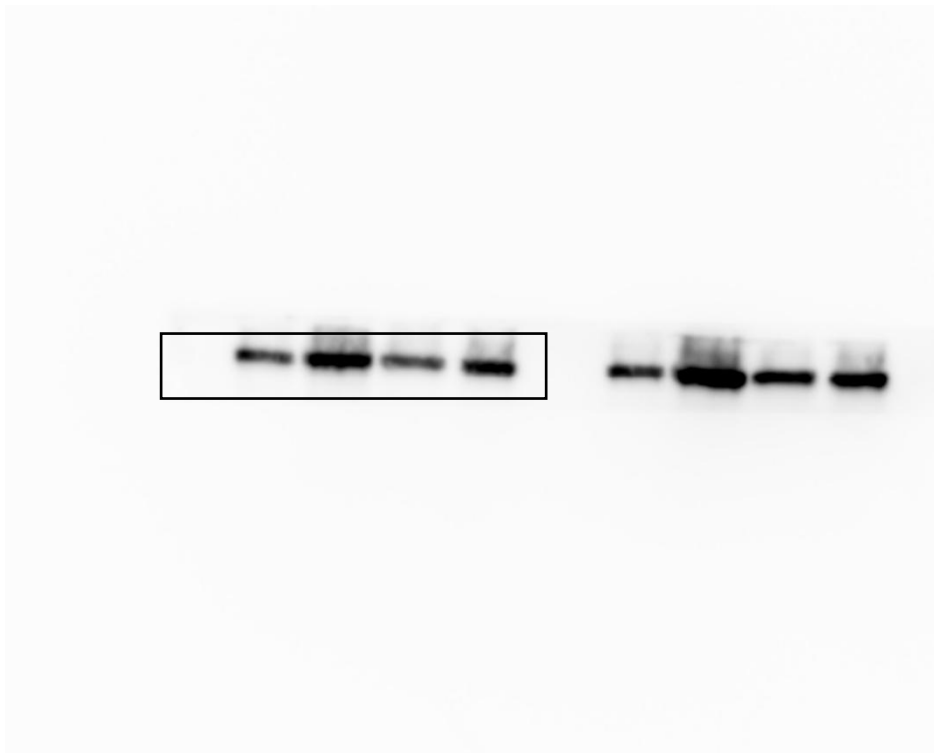

## Flag-Input

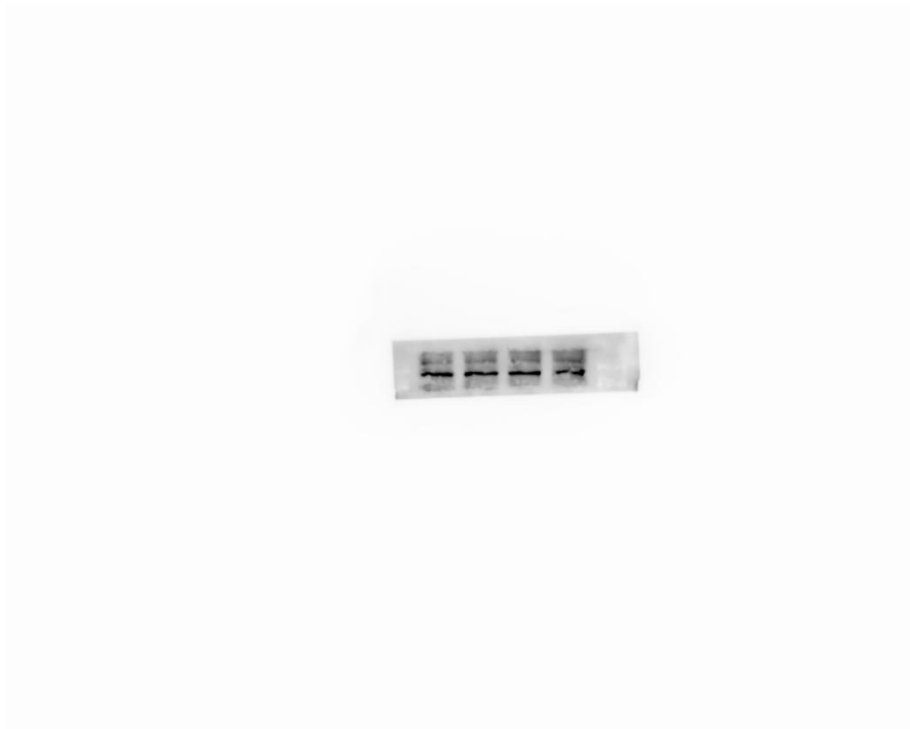

## GFP-Input

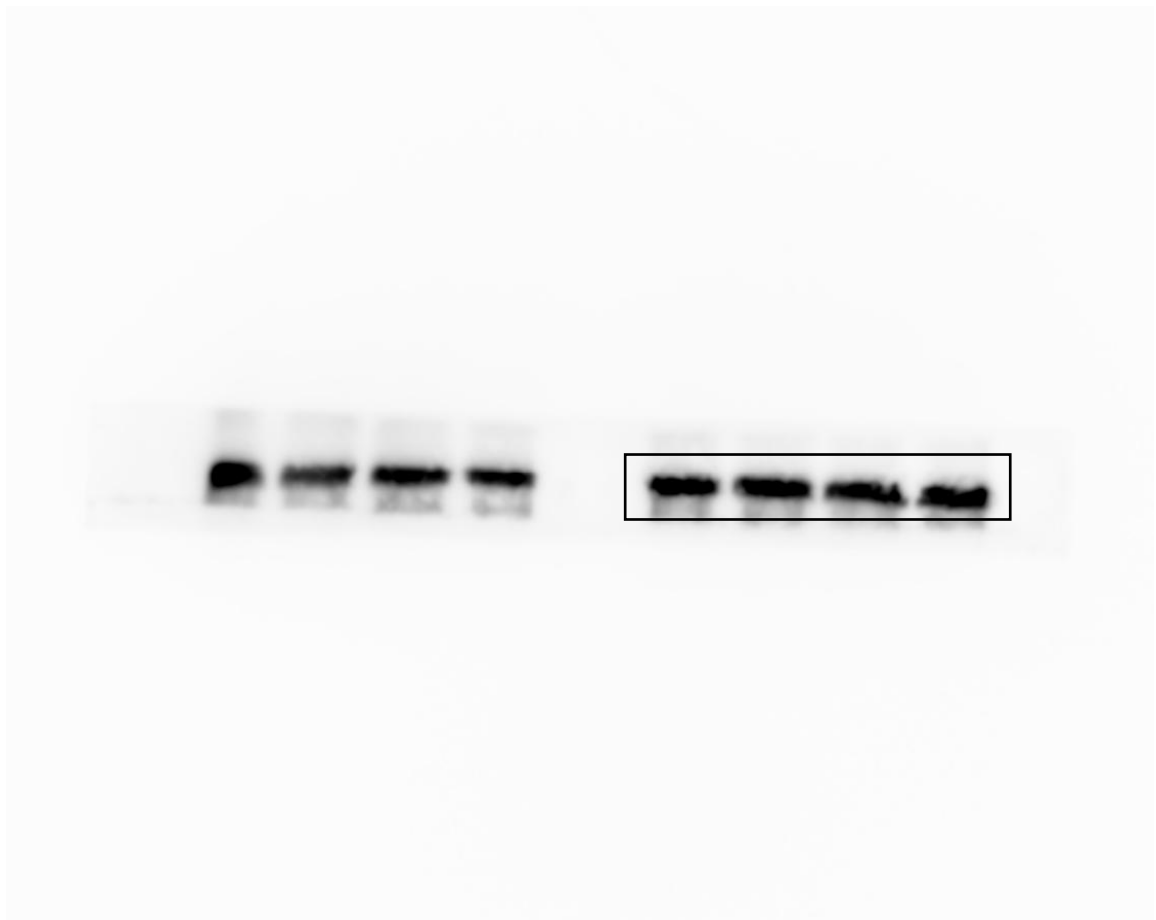

**ACTIN-Input**

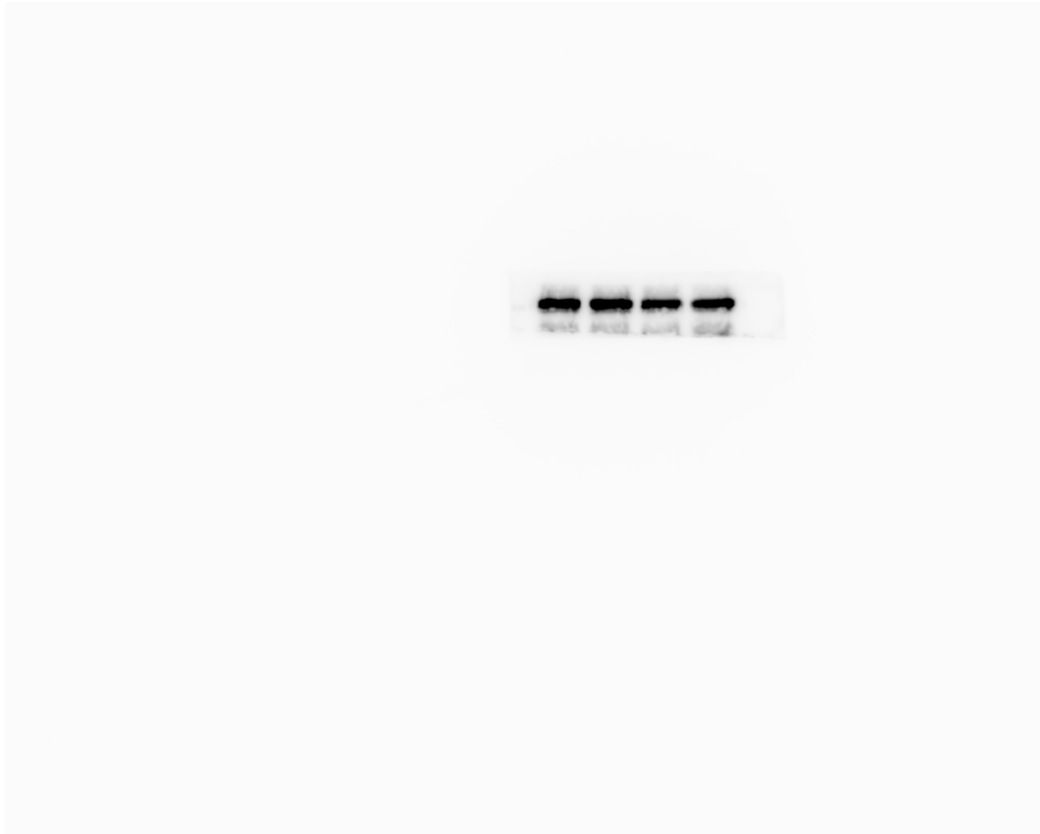

**Fig4E**

**GFP-IP**

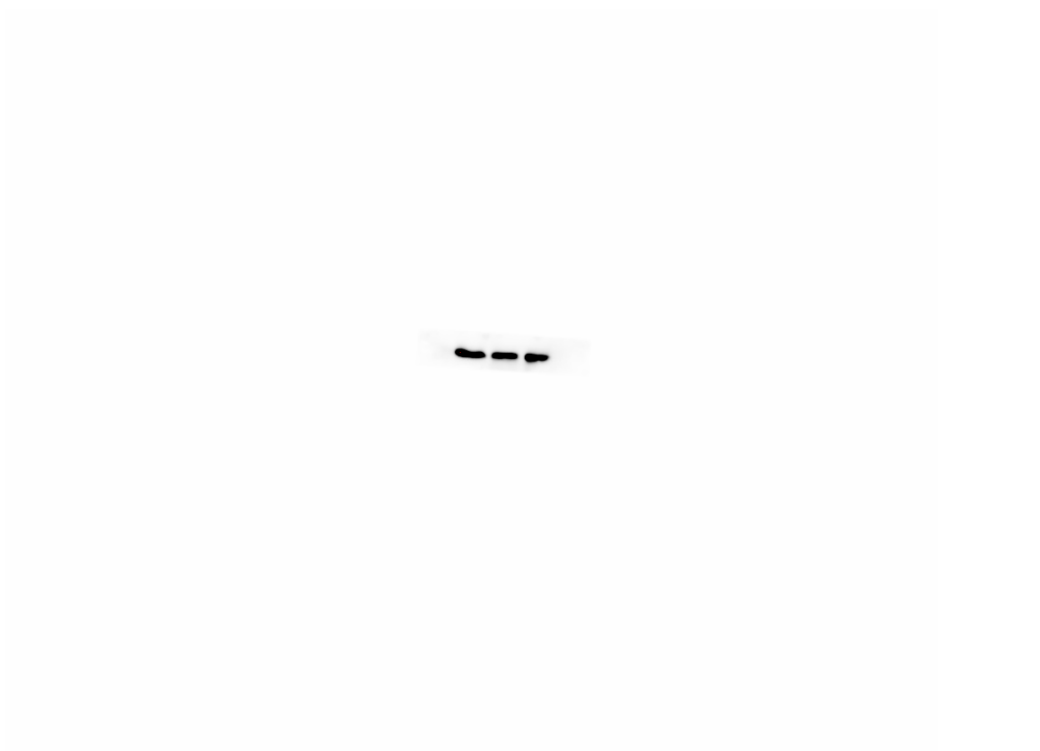

## Flag-IP

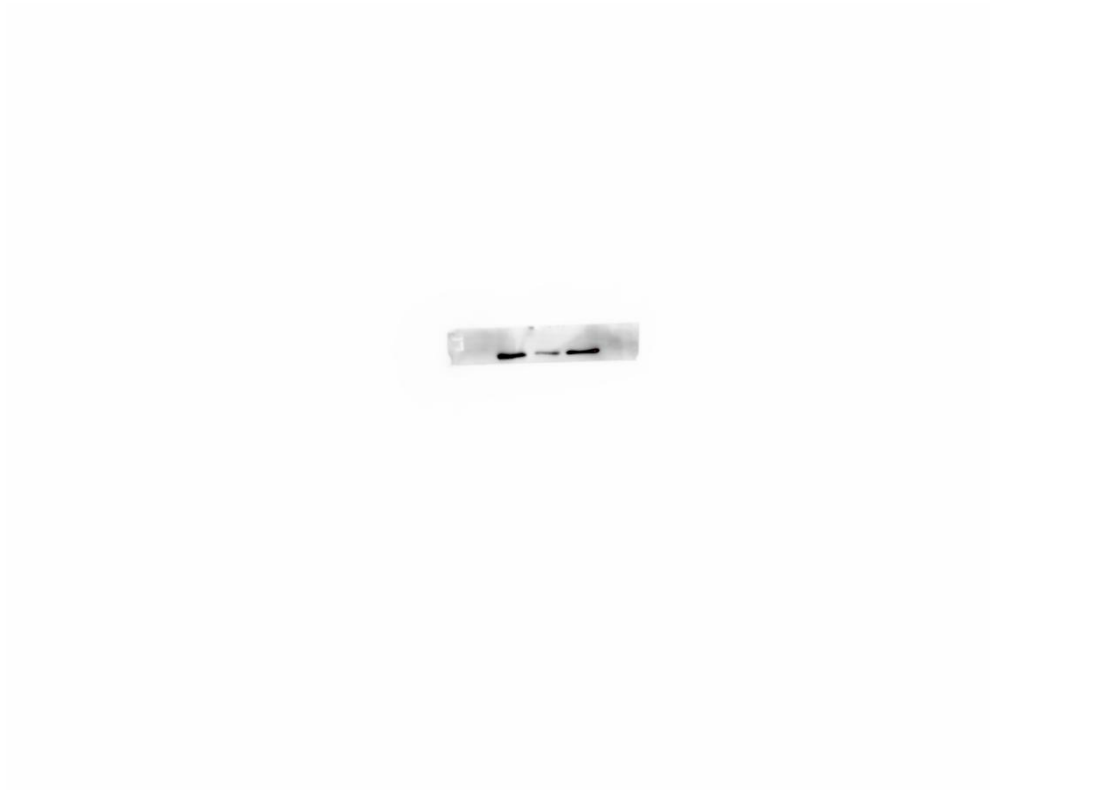

## Flag-Input

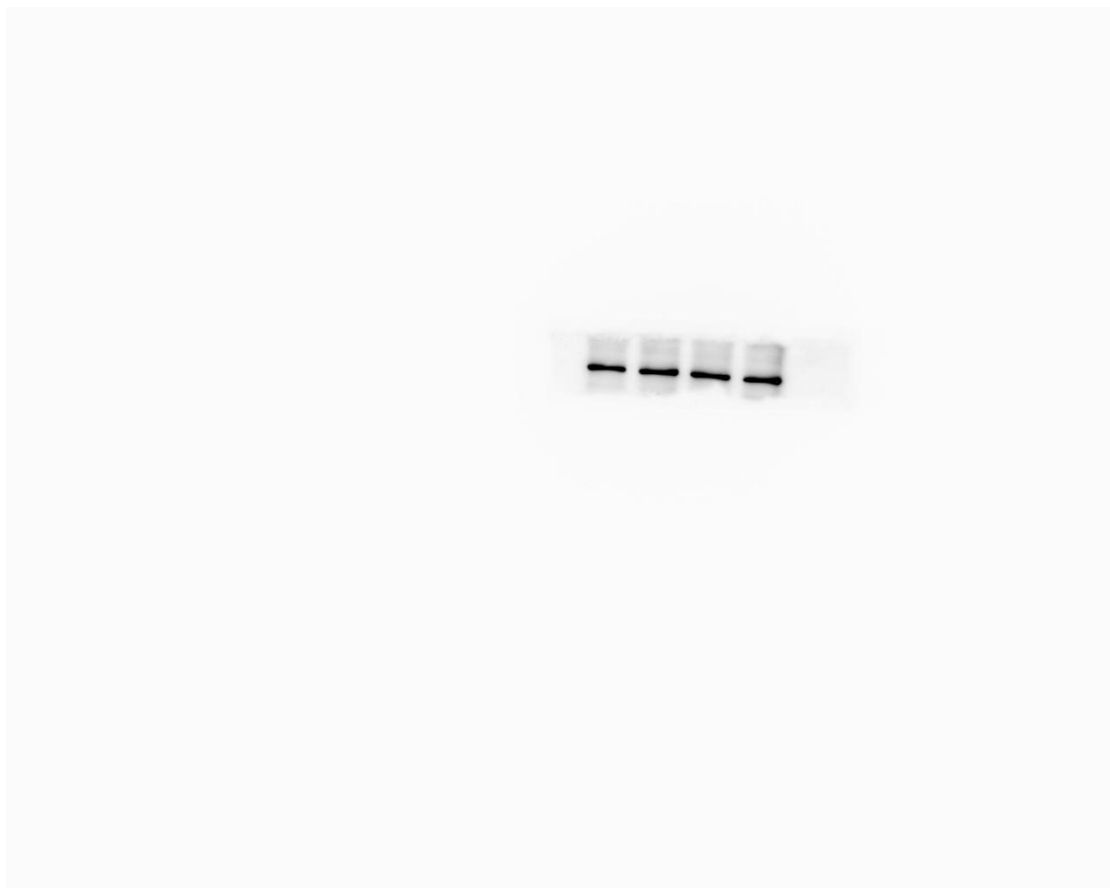

**GFP-Input**

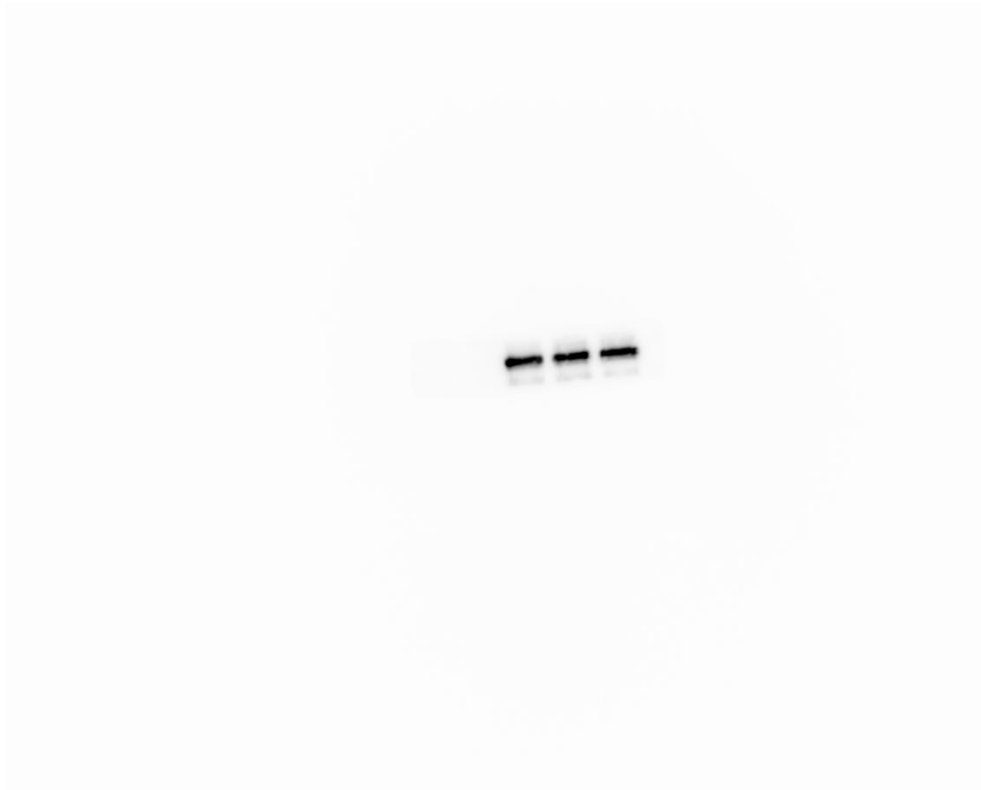

**ACTIN-Input**

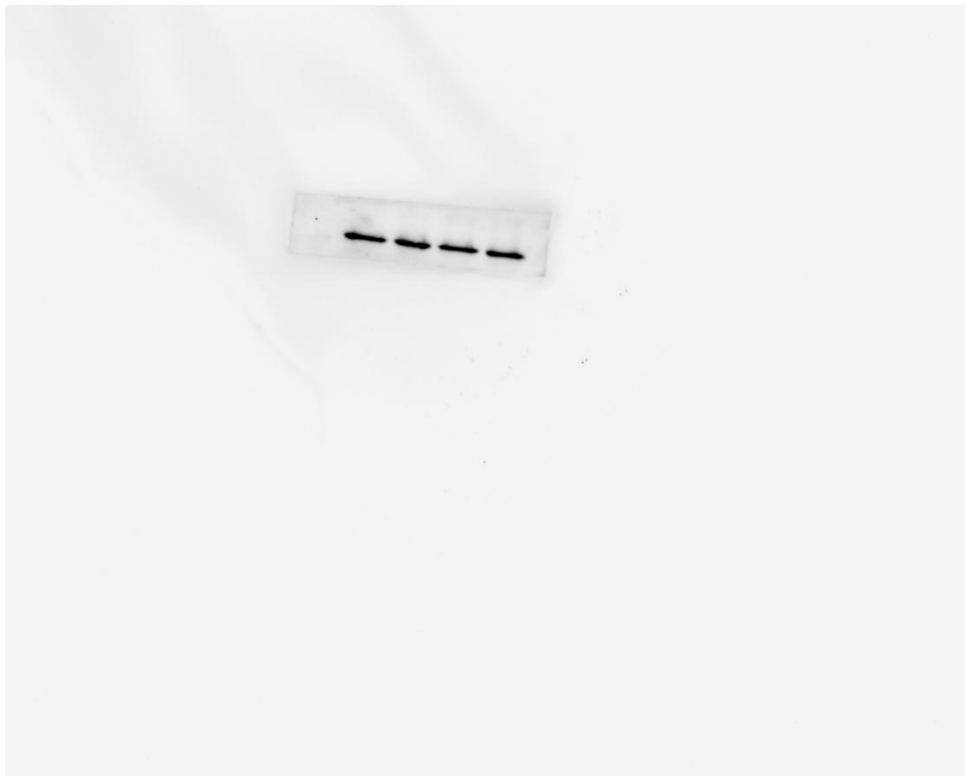

**Fig4F**

**MED12**

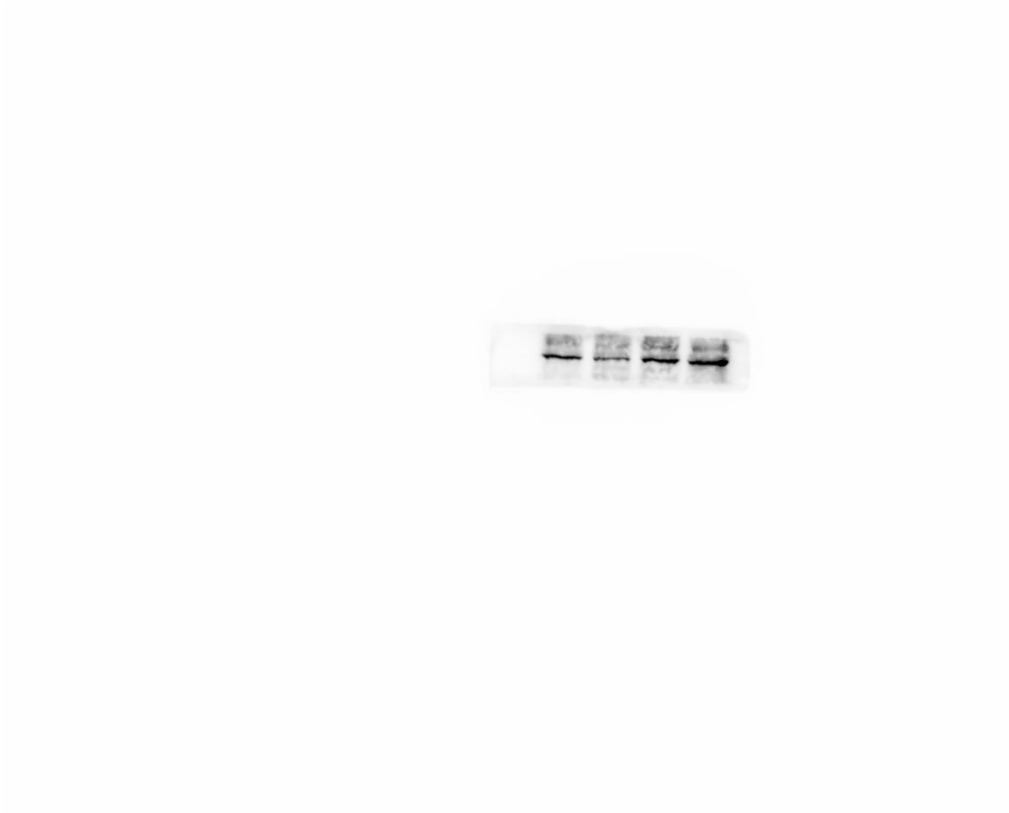

**GFP**

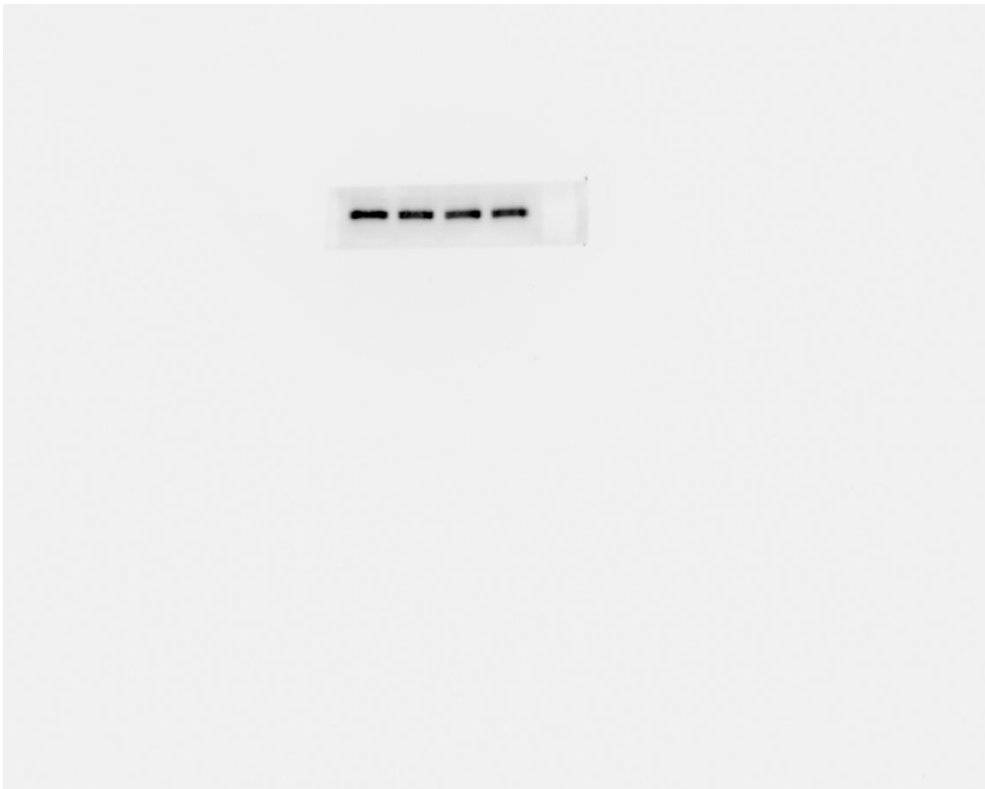

**ACTIN**

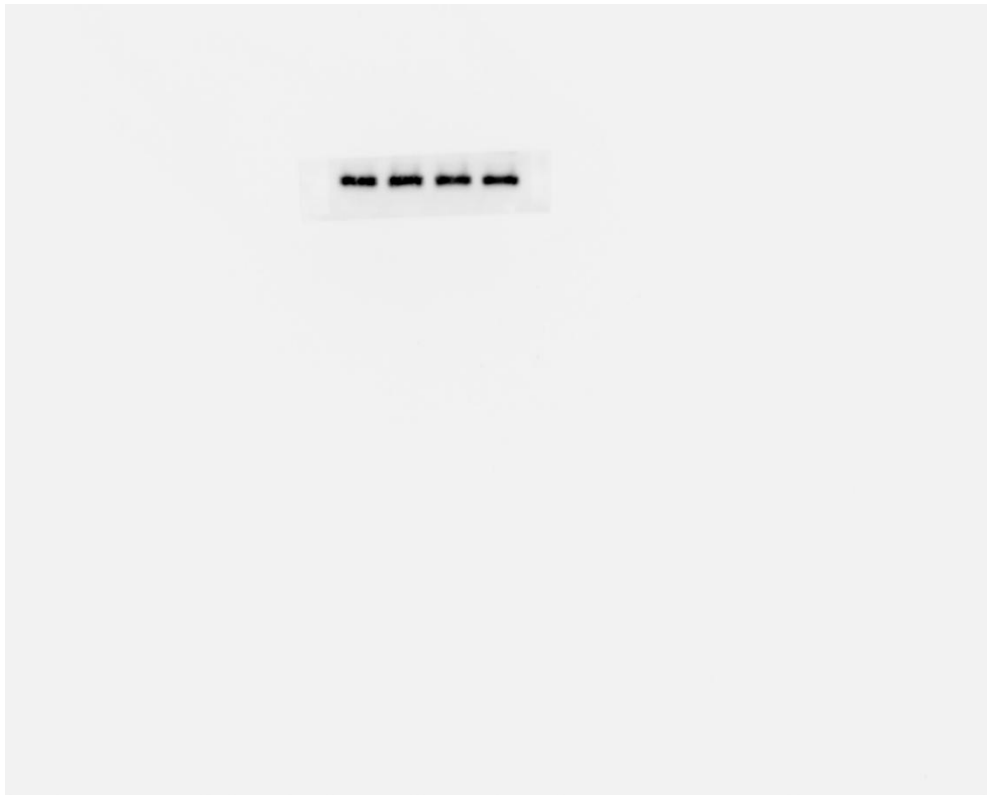

**Fig4G**

**MED12**

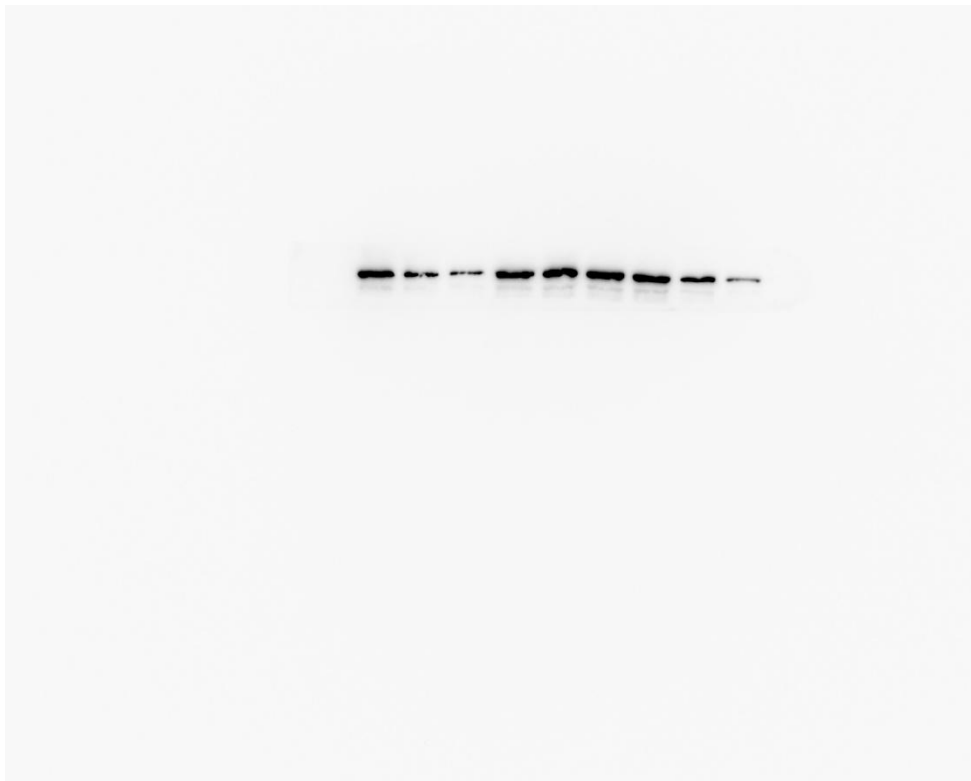

**GFP**

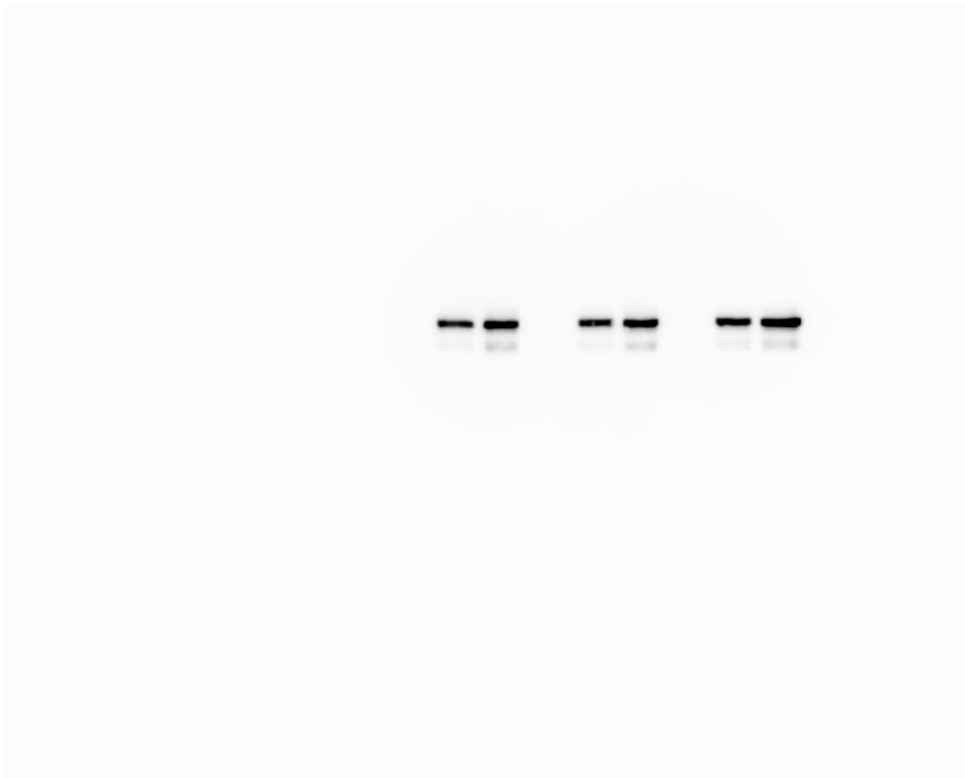

**GAPDH**

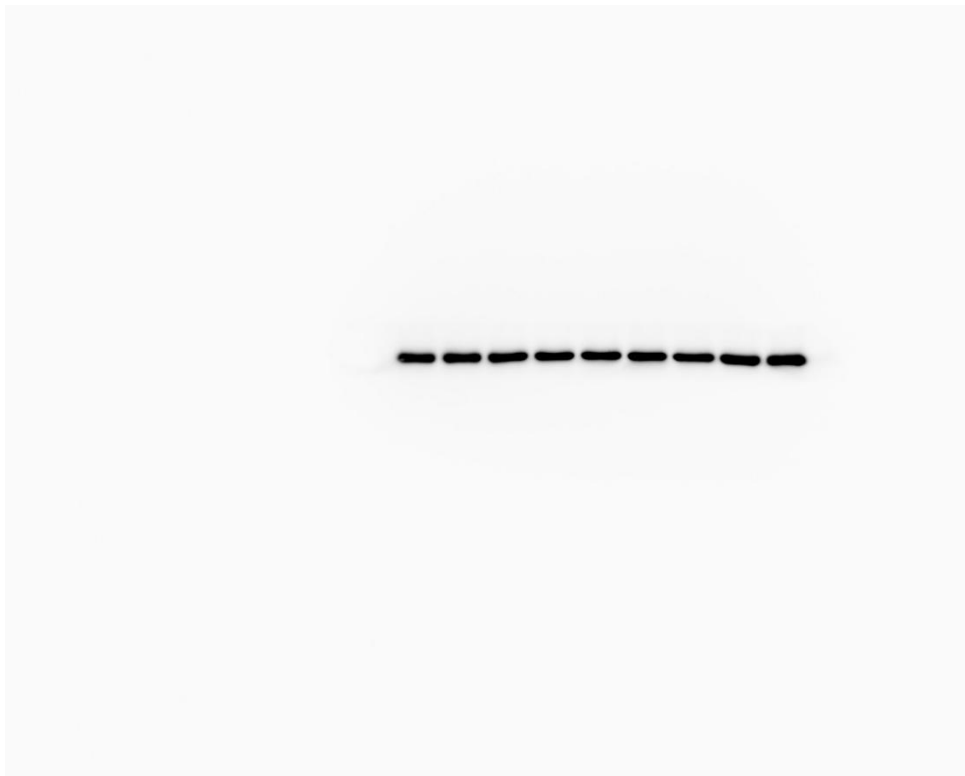

**Fig5B**

**MED12**

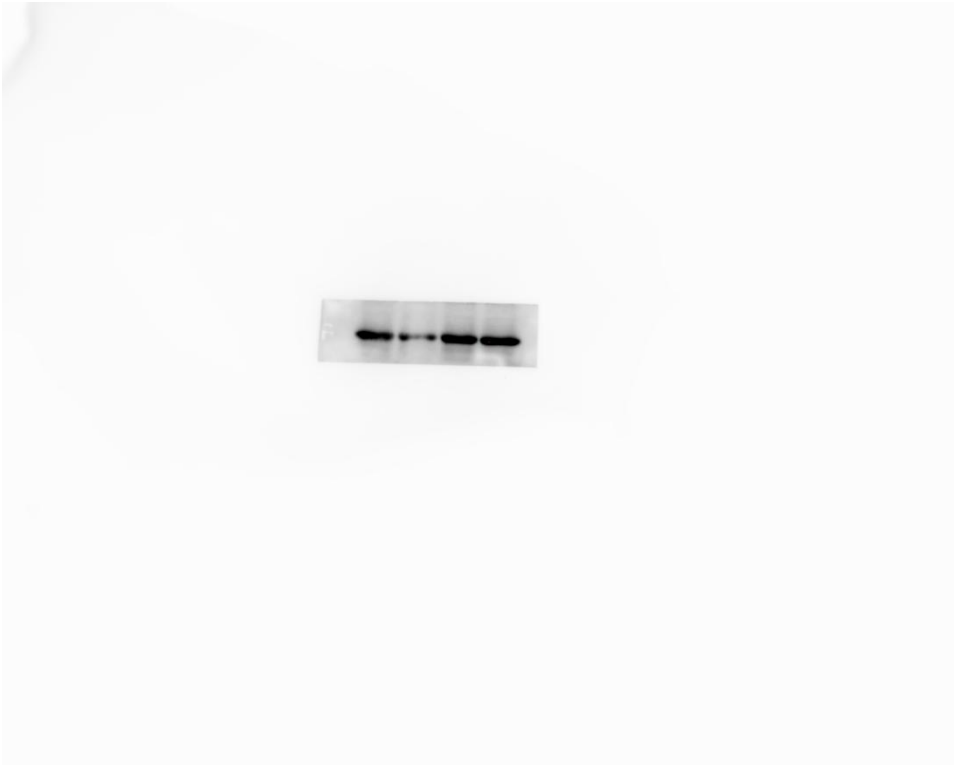

**GFP**

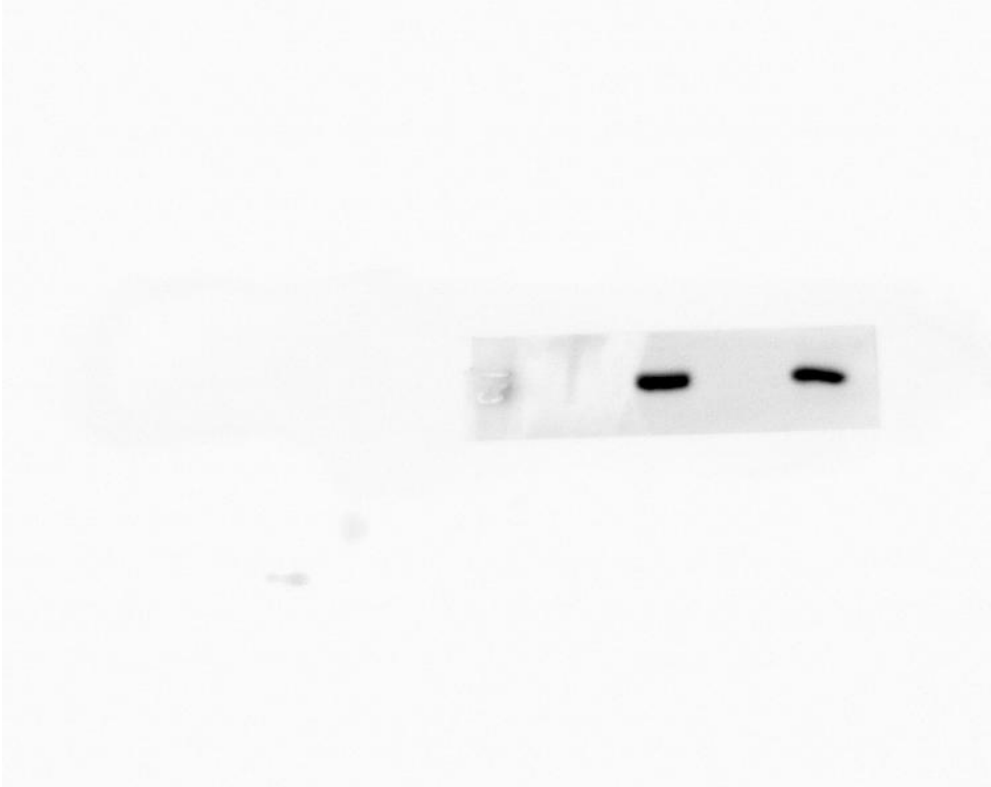

**GAPDH**

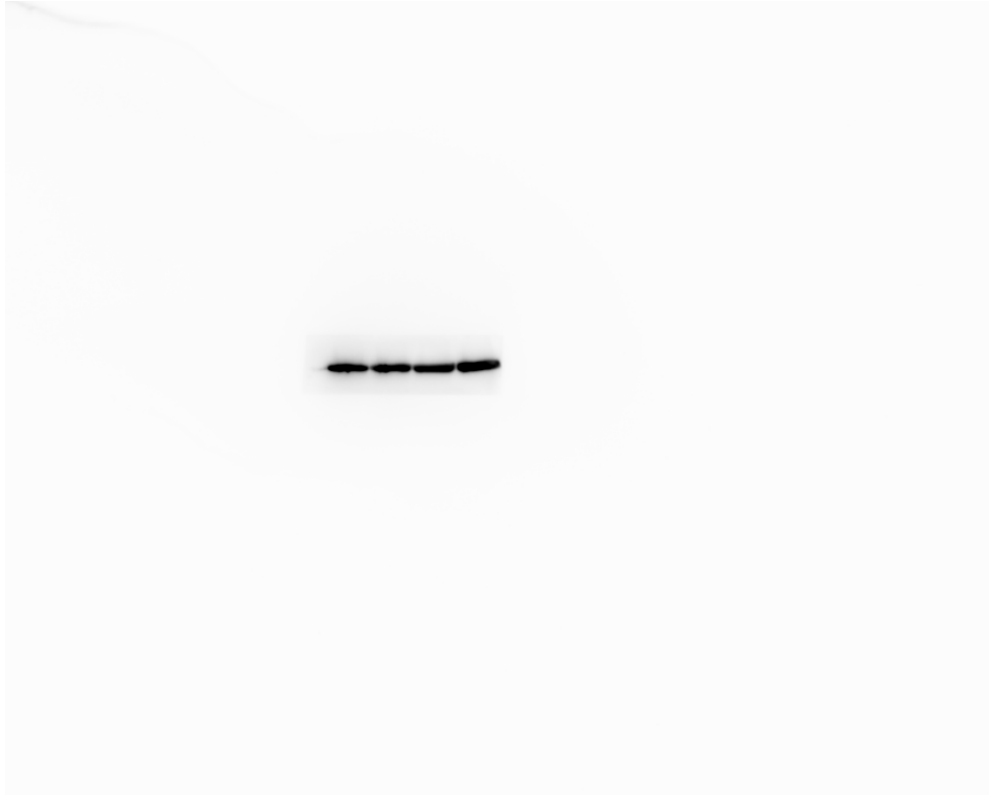

**Fig5C**

**MED12**

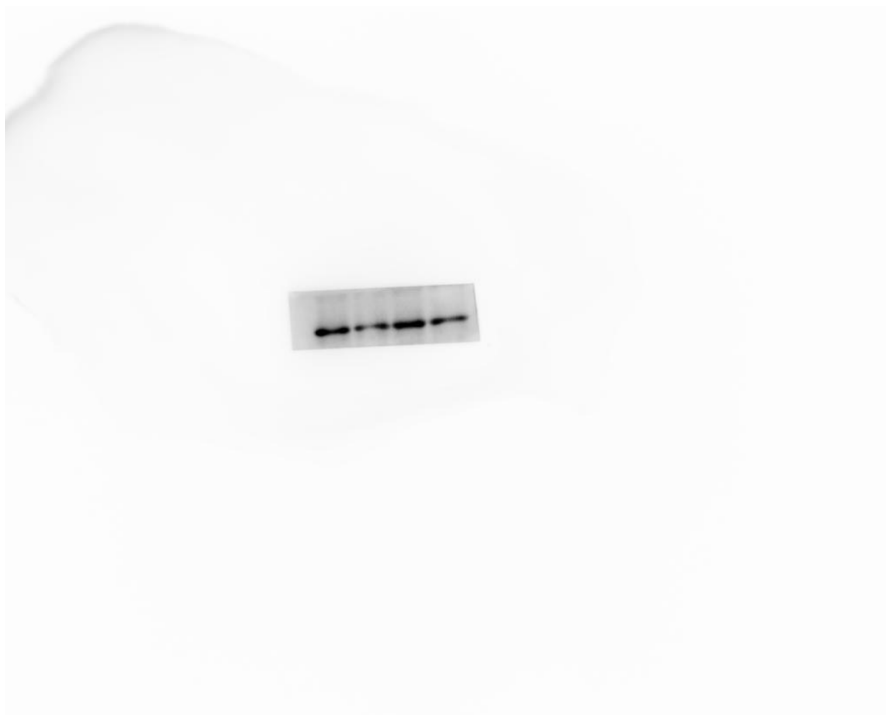

**GFP**

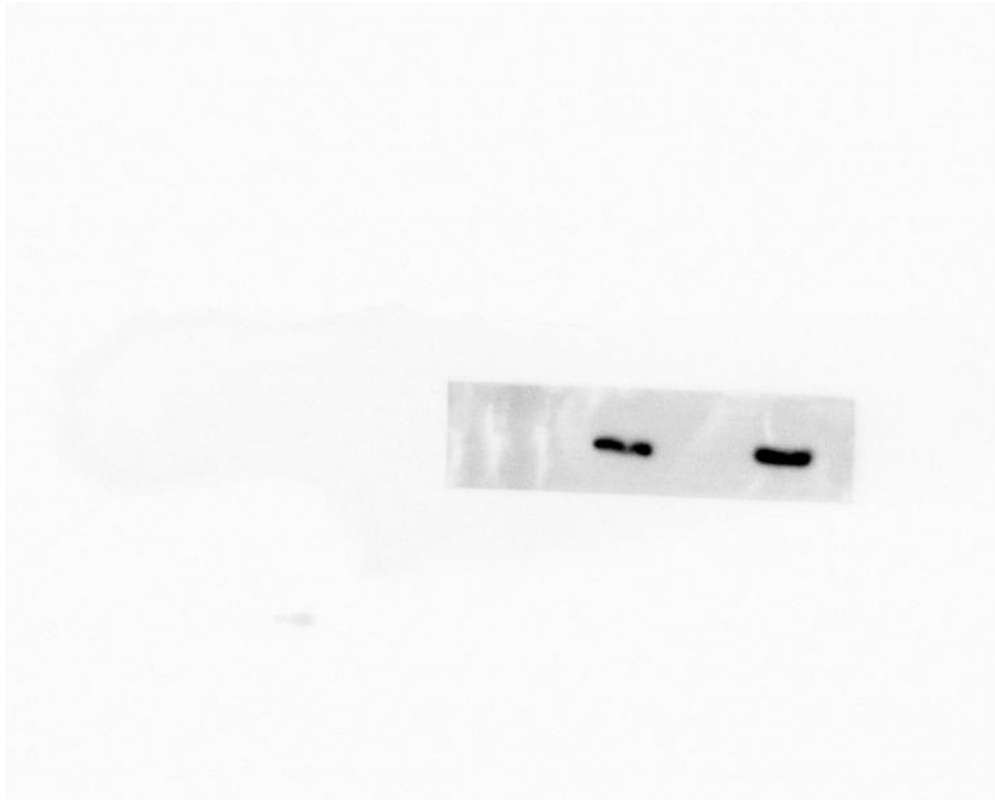

**GAPDH**

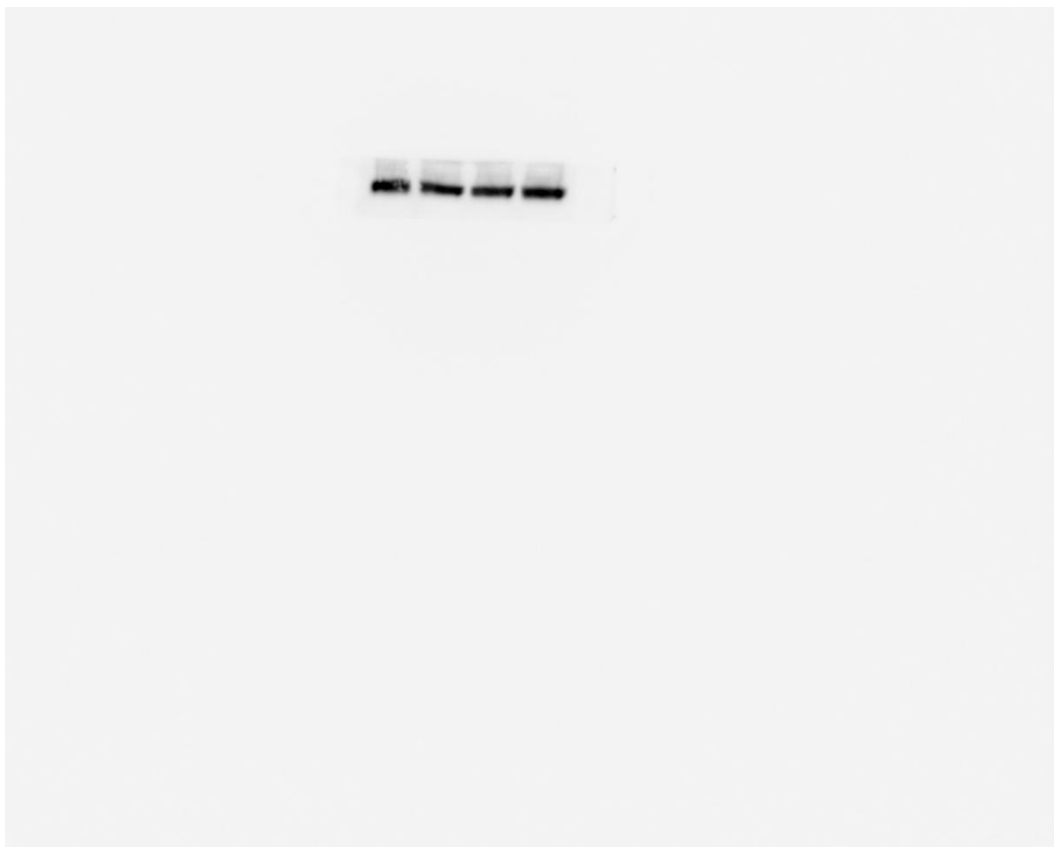

**Fig5D**

**MED12**

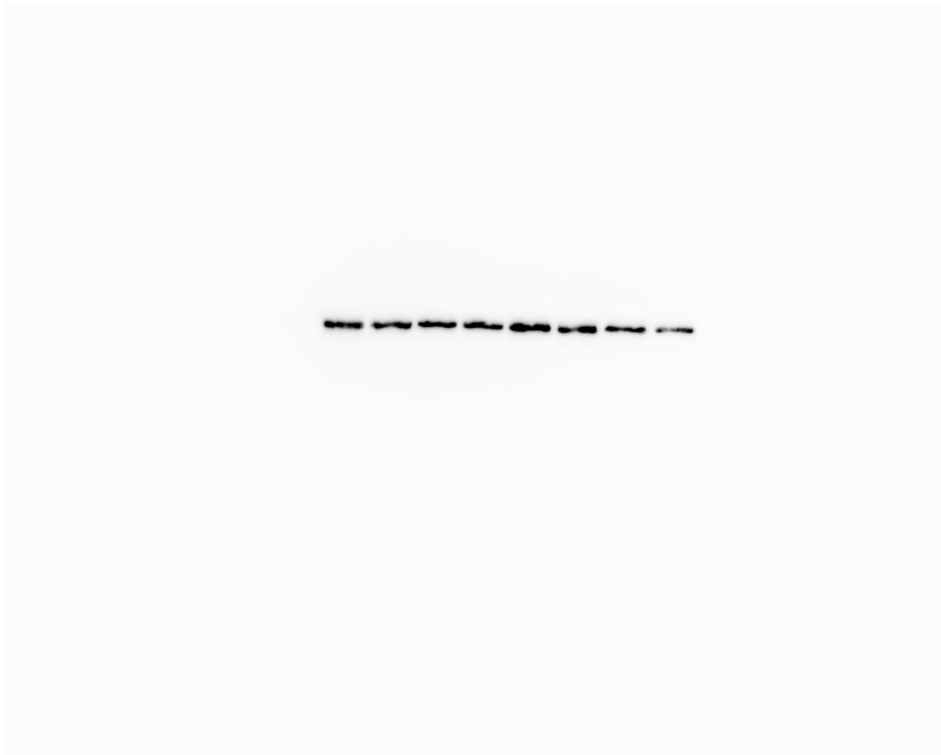

**GAPDH**

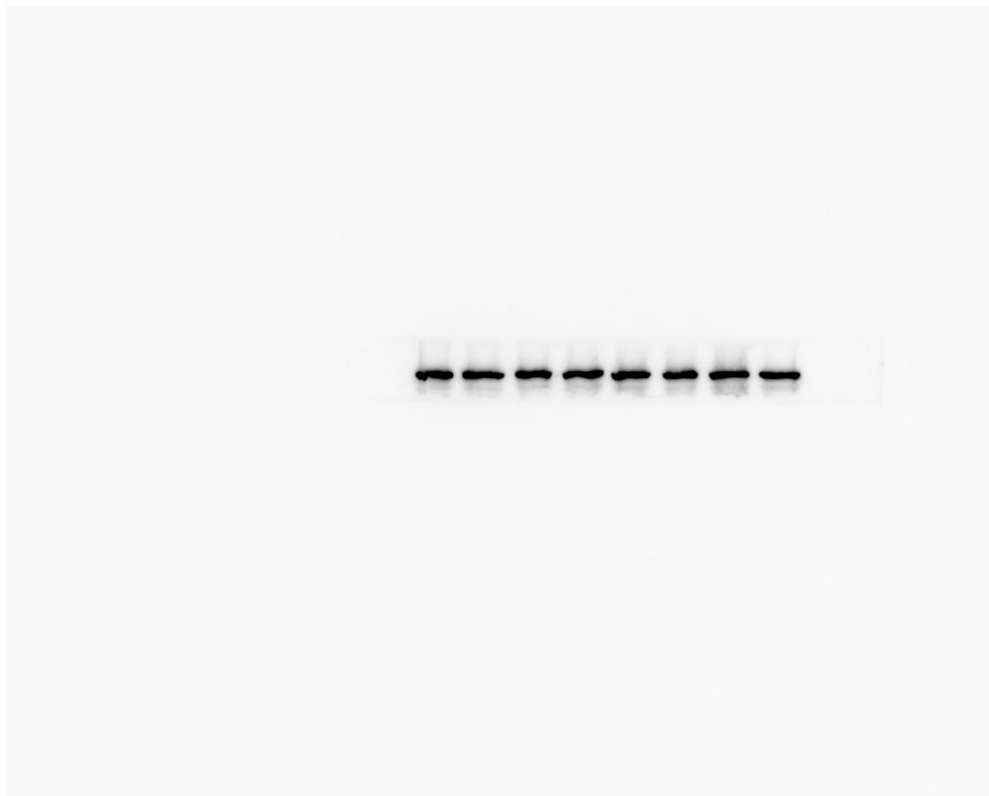

**Fig5E**

**Ub-IP**

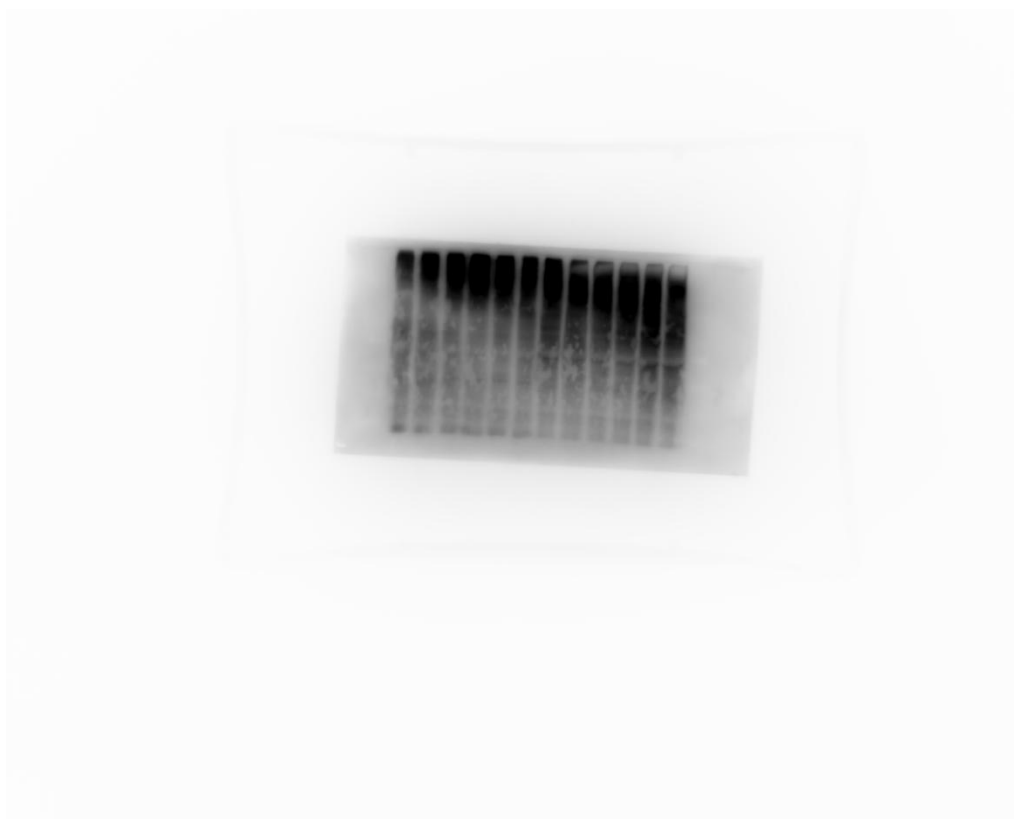

**MED12-IP**

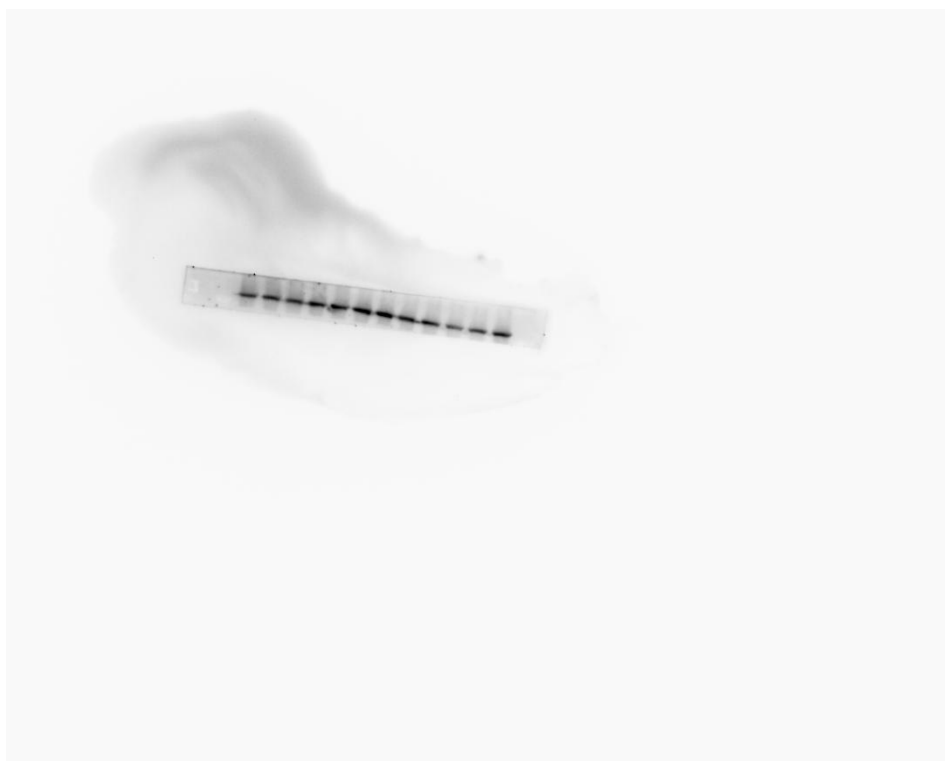

**MED12-Input**

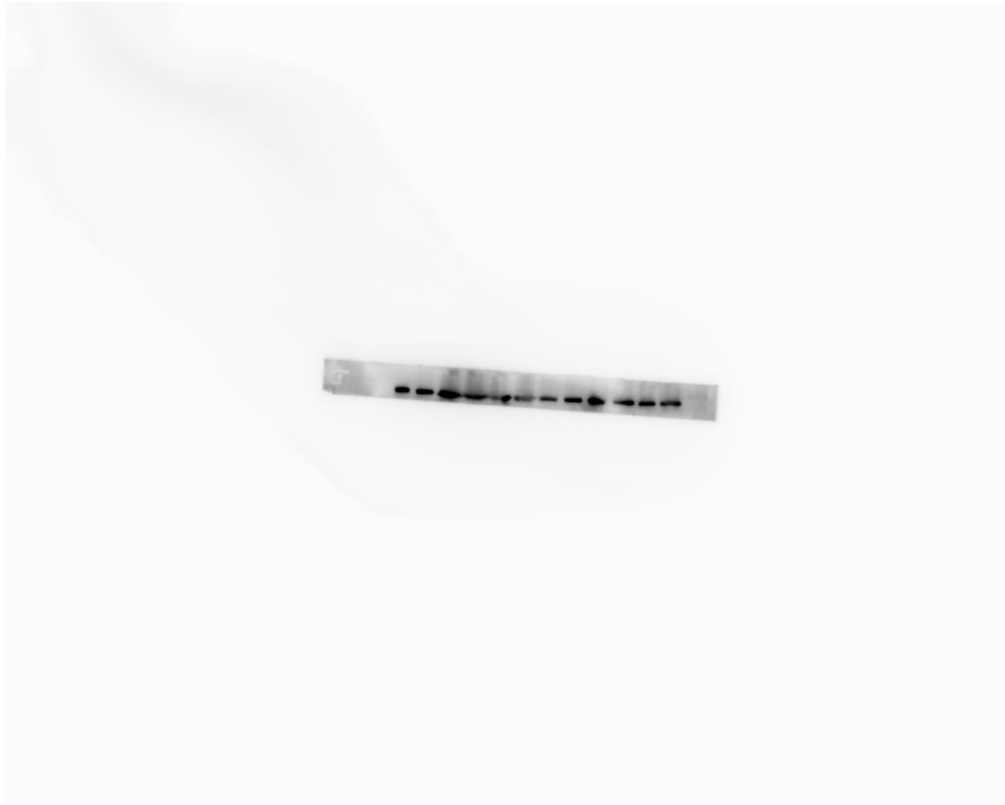

**GAPDH**

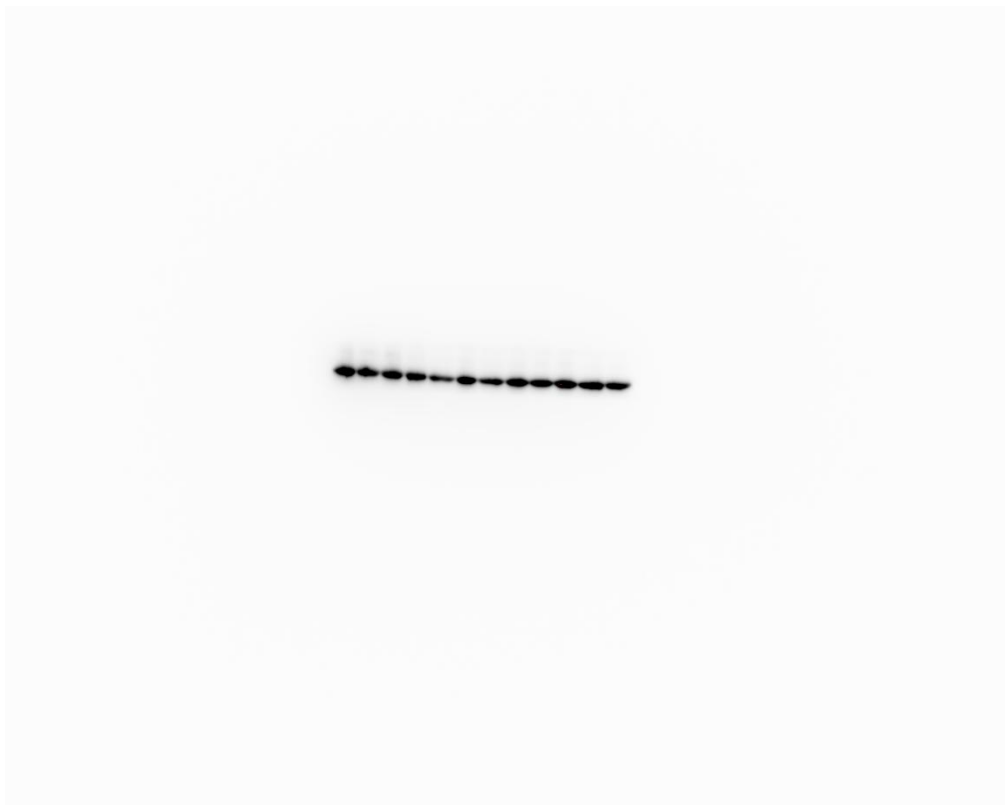

**Fig5F**

**HA-Ub-IP**

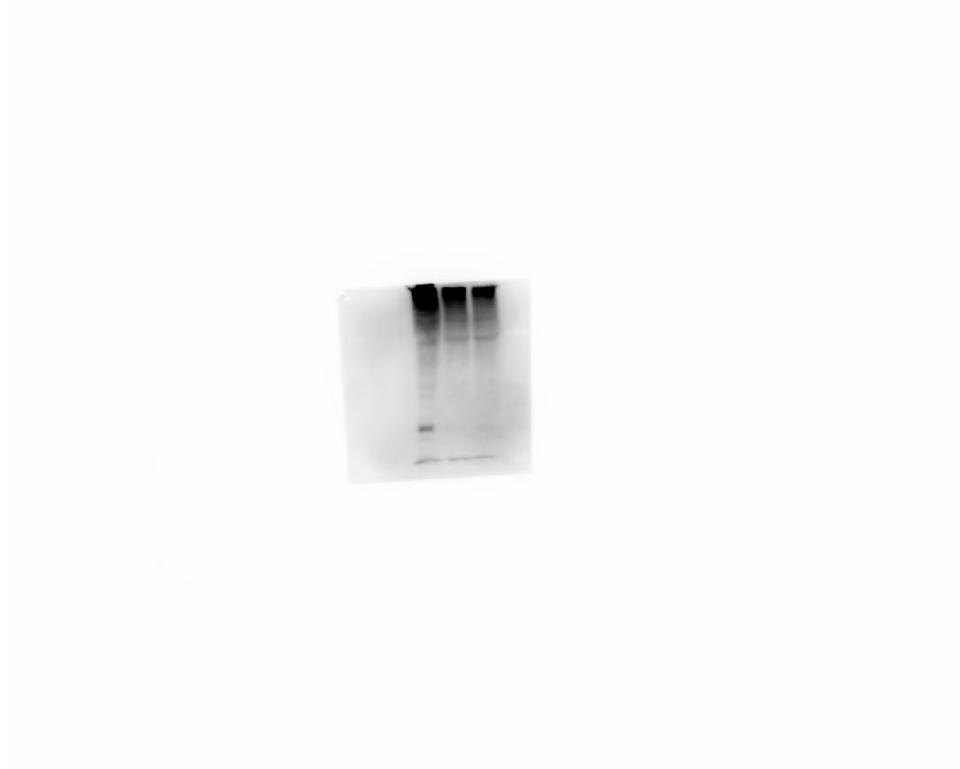

**MED12-IP**

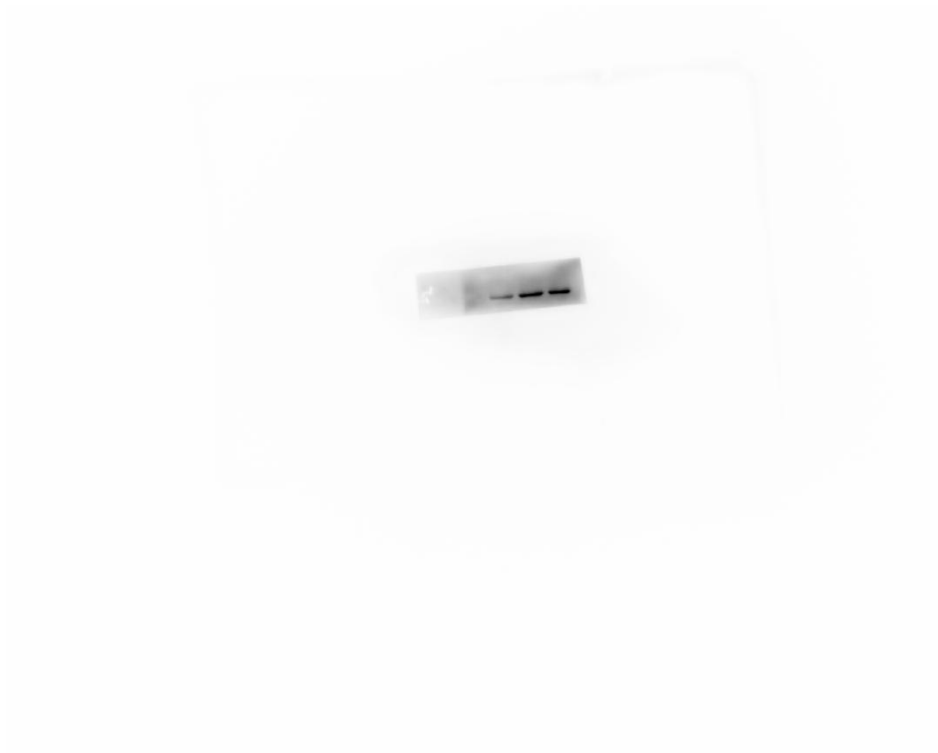

**HA-Ub-Input**

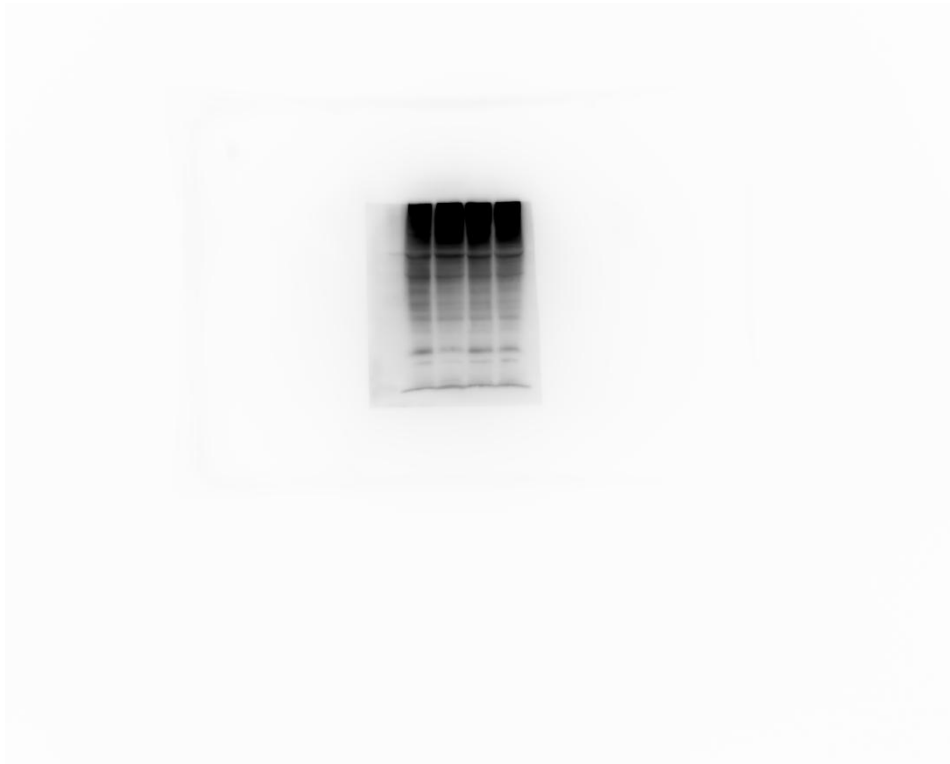

**MED12-Input**

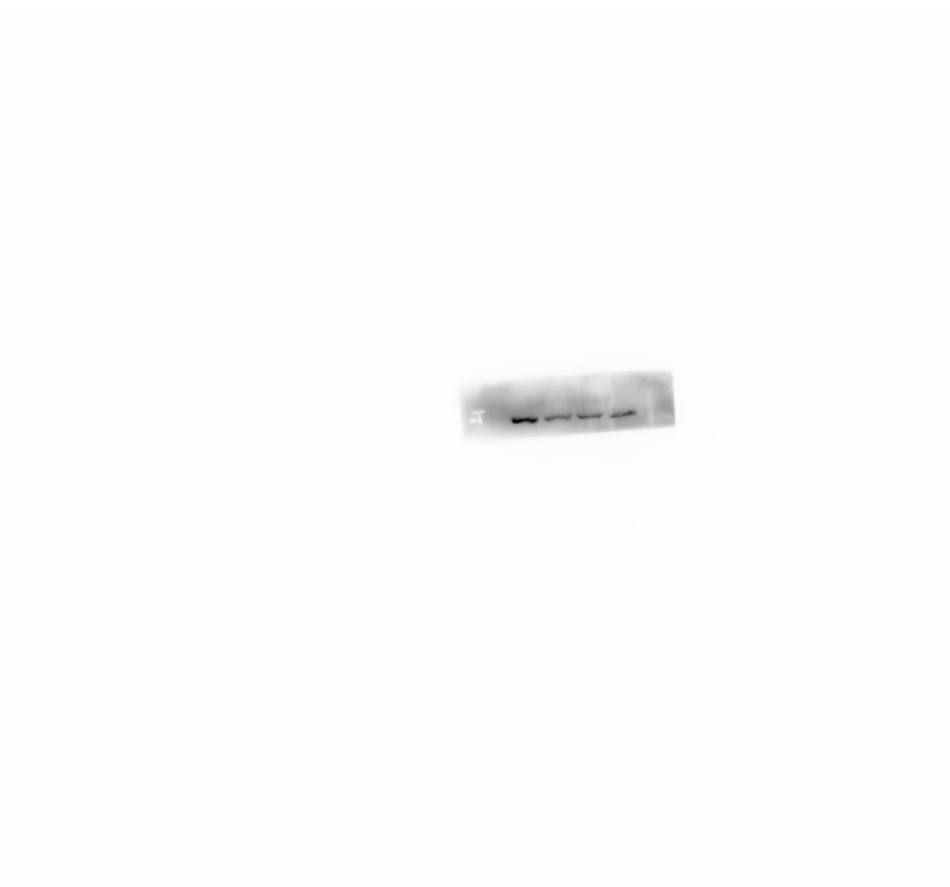

**FBXO7-Input**

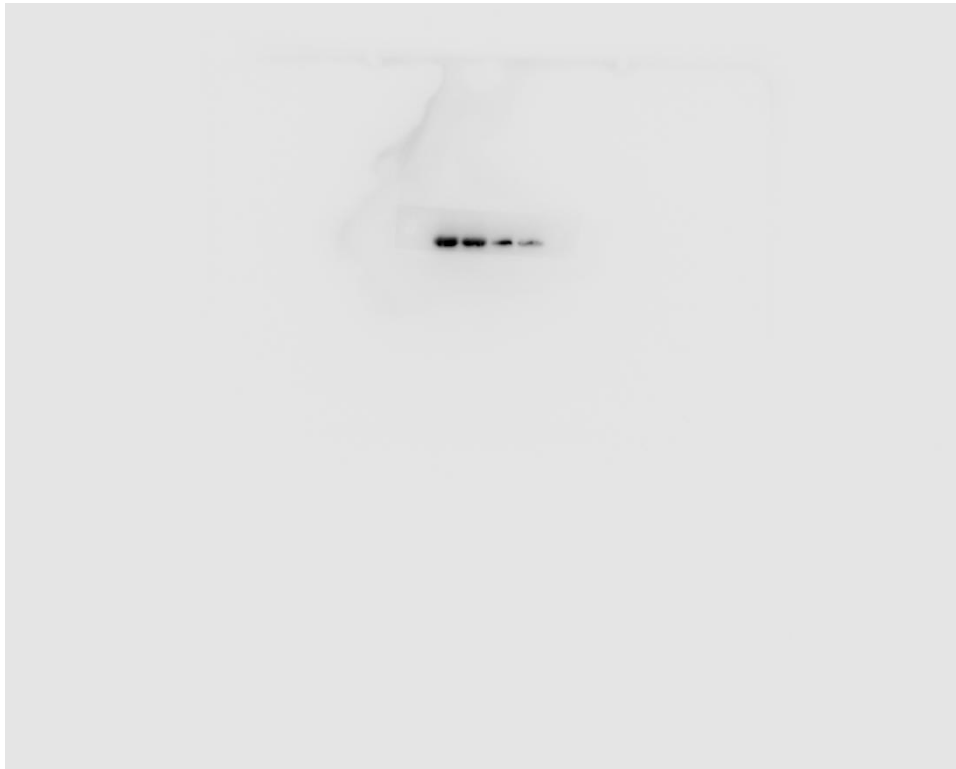

**GAPDH**

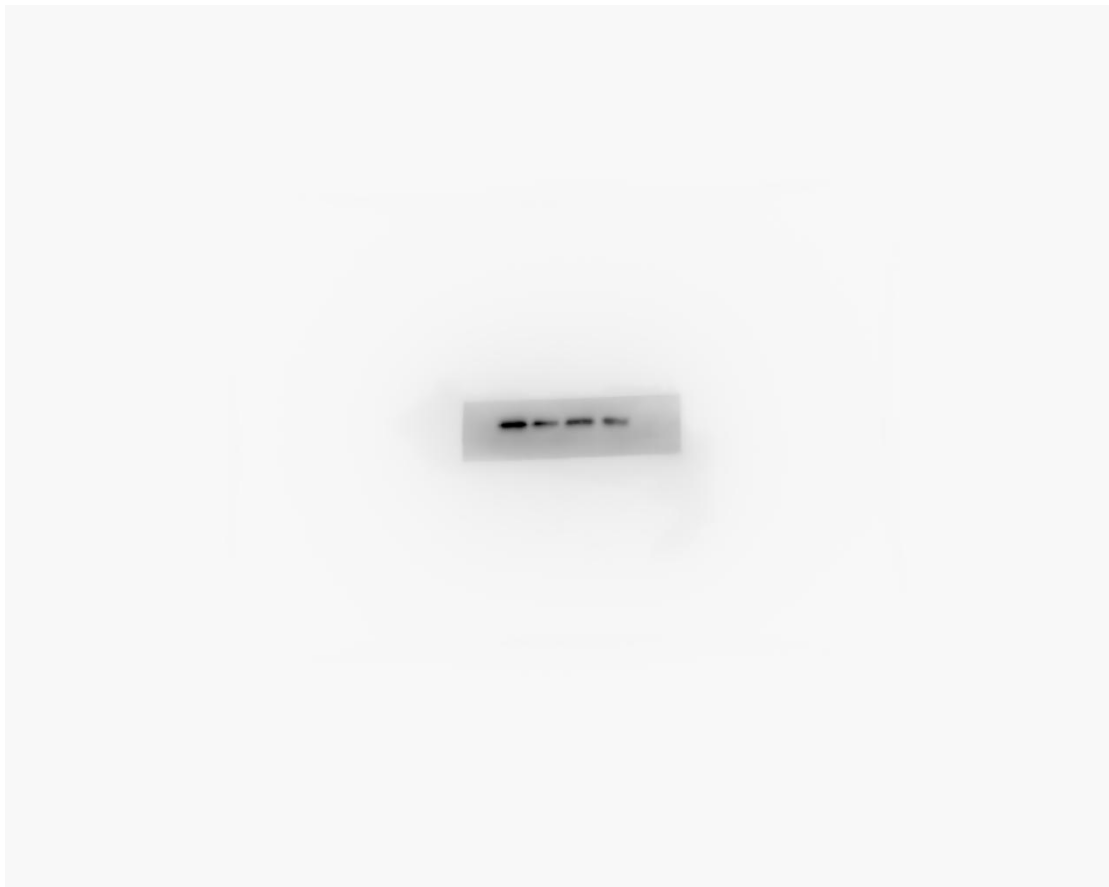

**Fig5G**

**HA-Ub-IP**

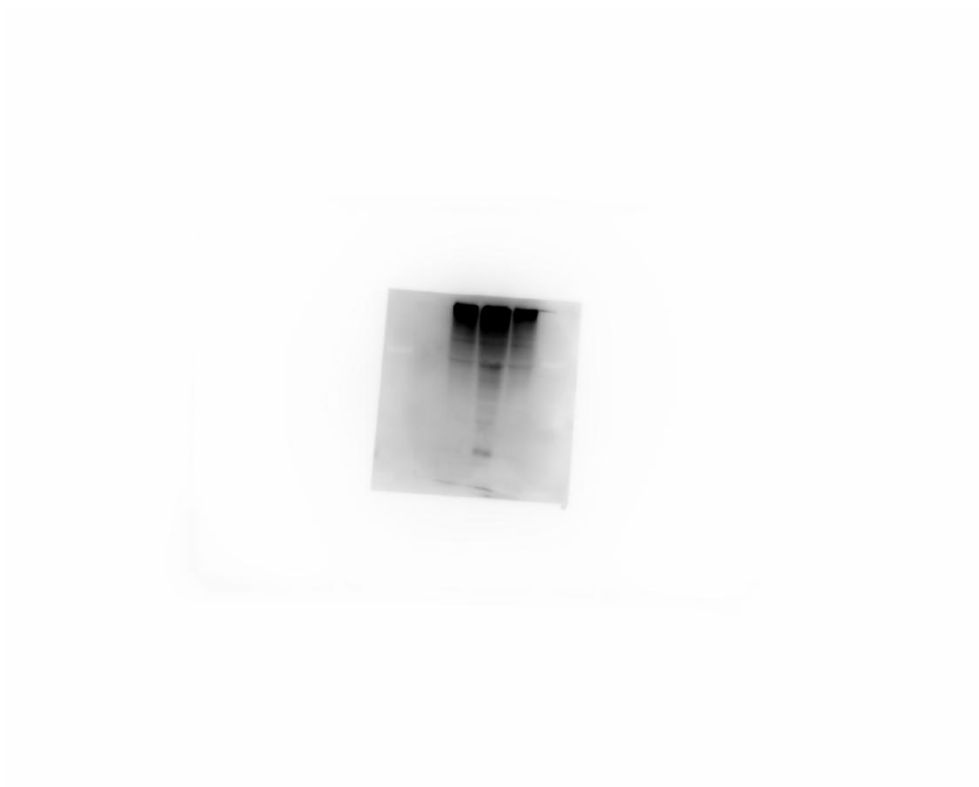

**MED12-IP**

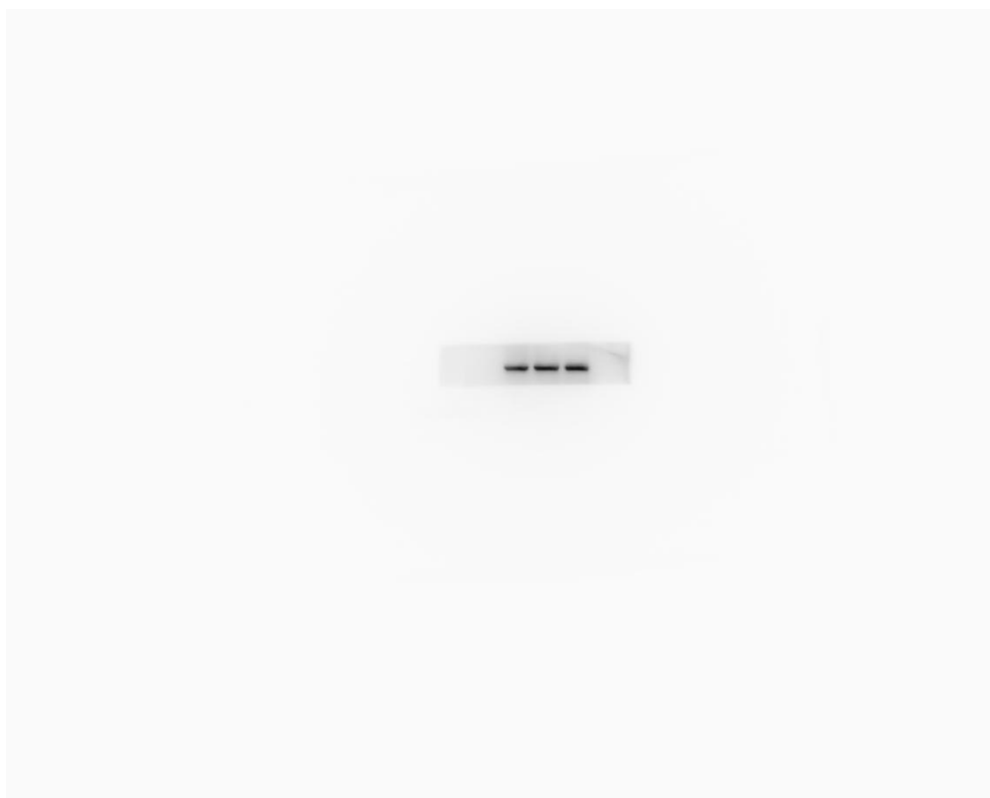

**HA-Ub-Input**

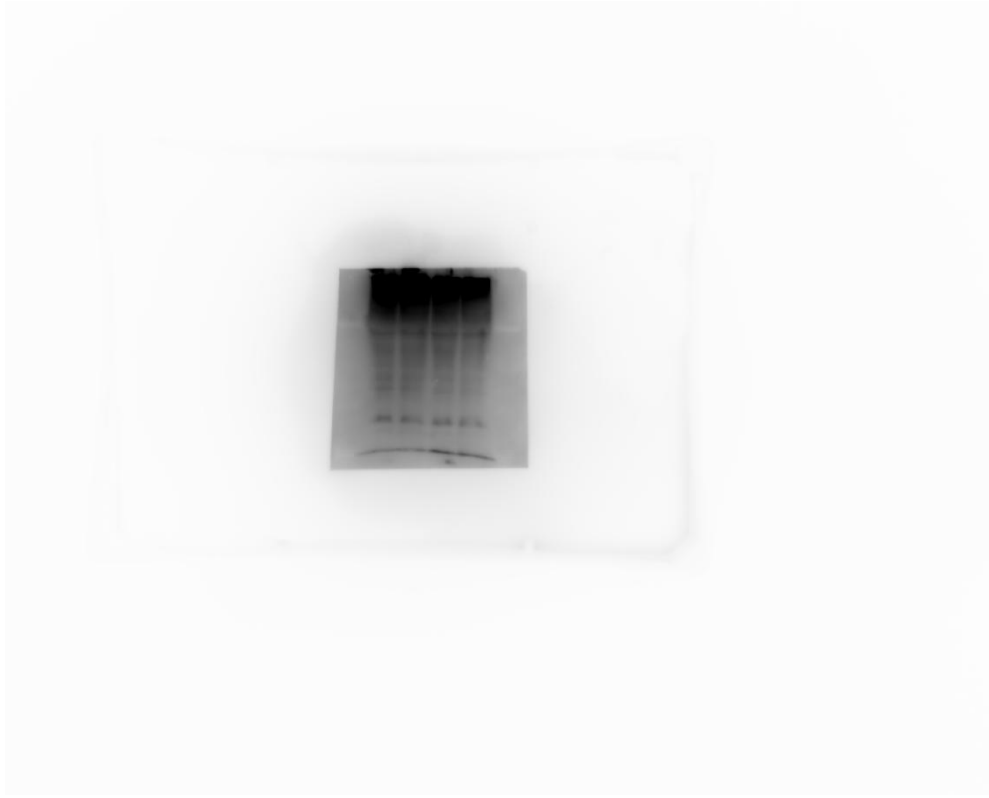

**MED12-Input**

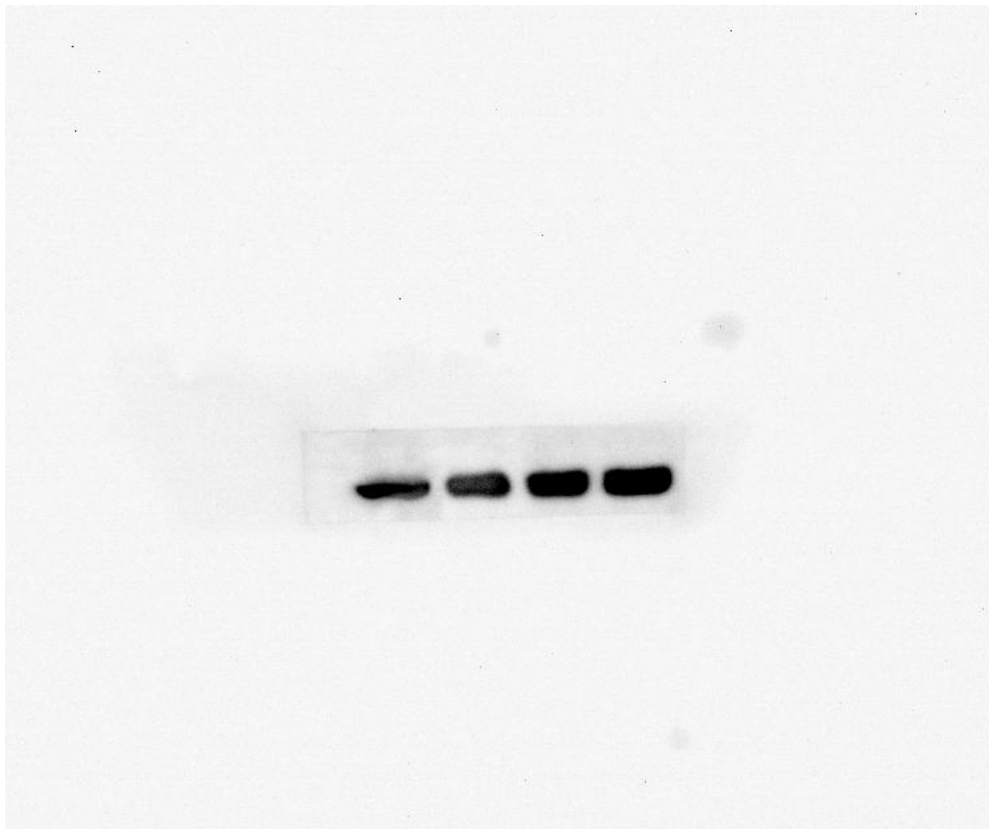

## GFP-Input

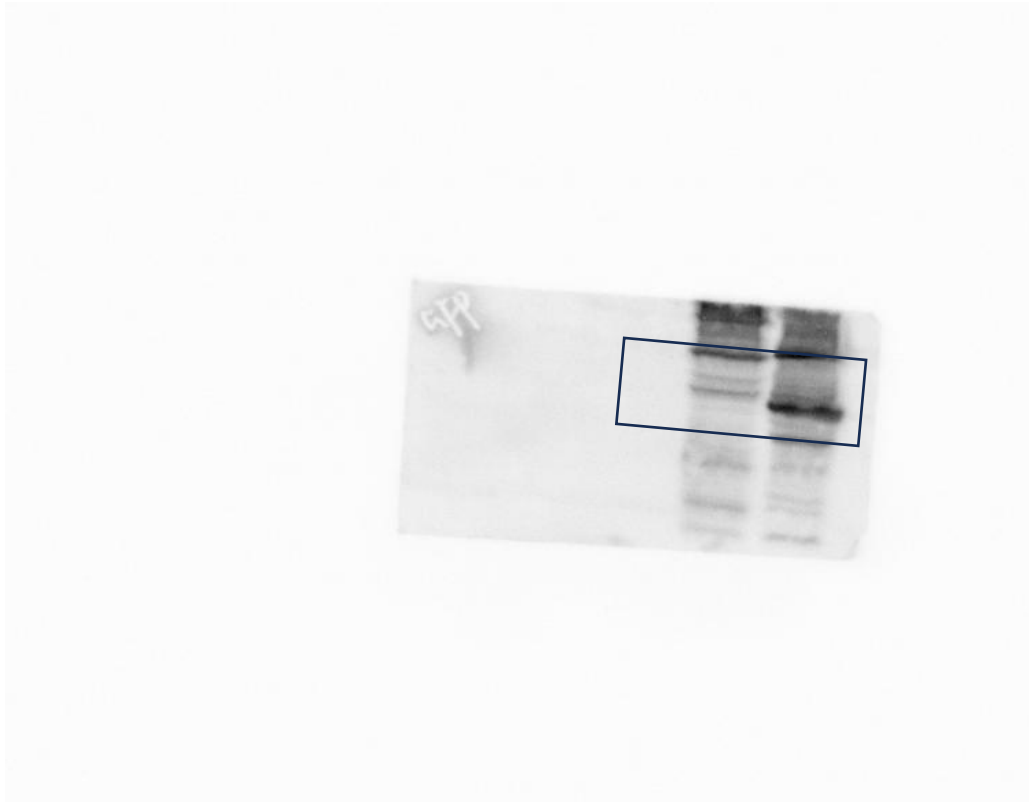

## GAPDH

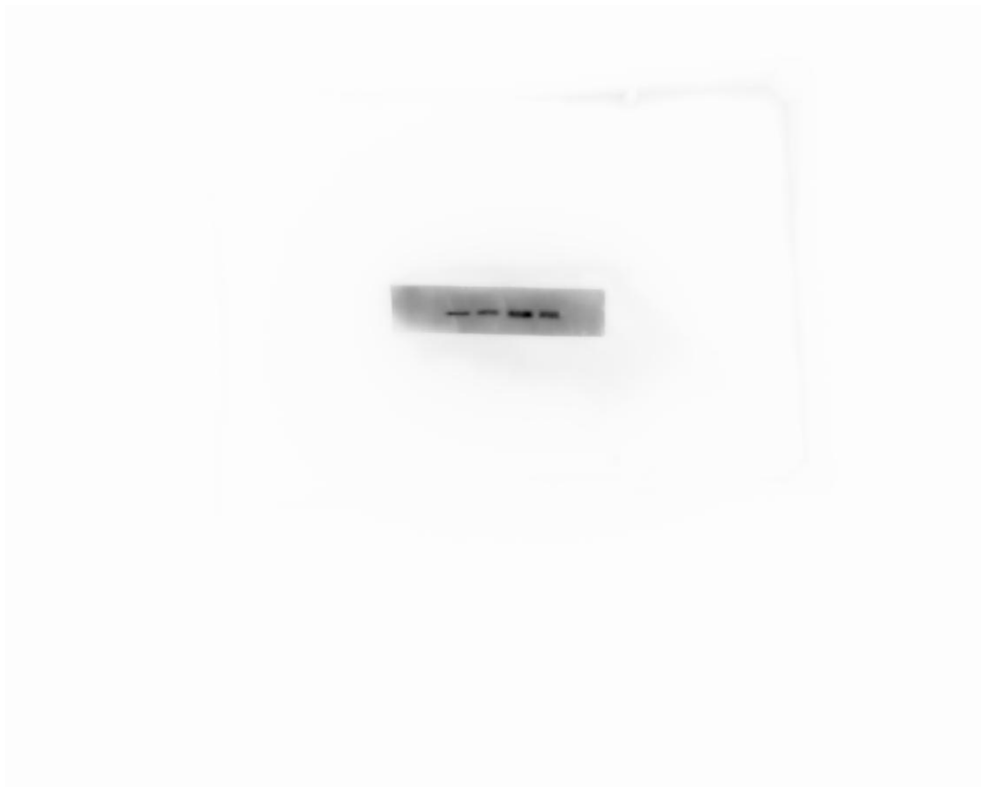

**Fig5H**

**HA-Ub-IP**

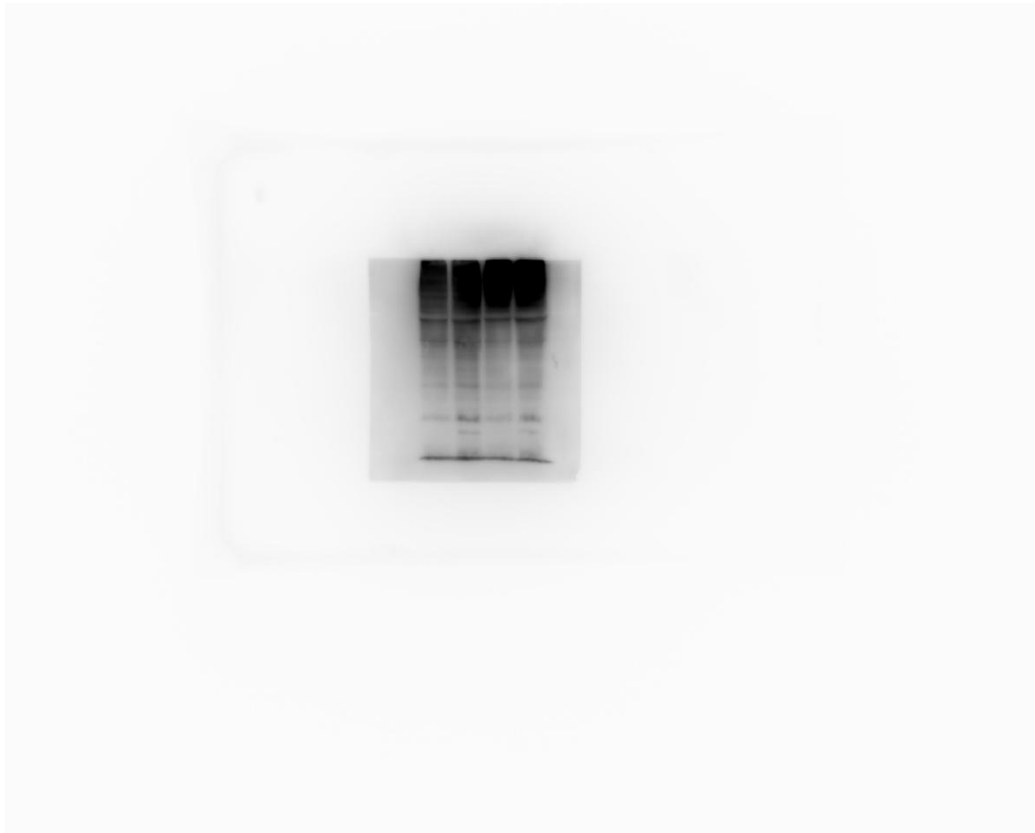

**Flag-IP**

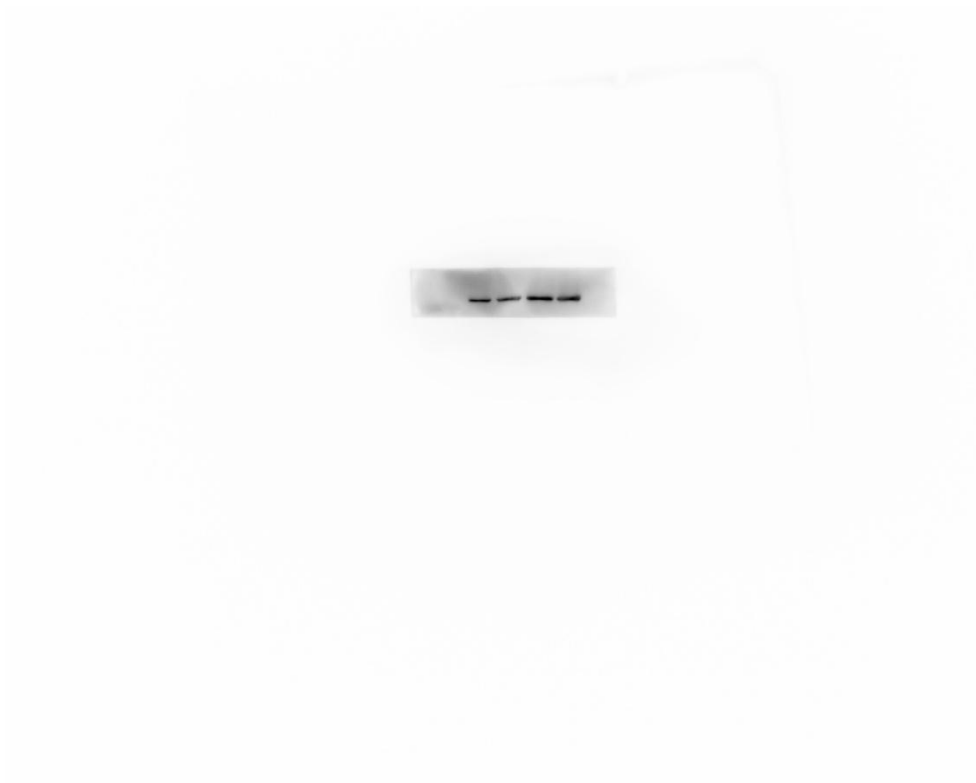

## HA-Ub-Input

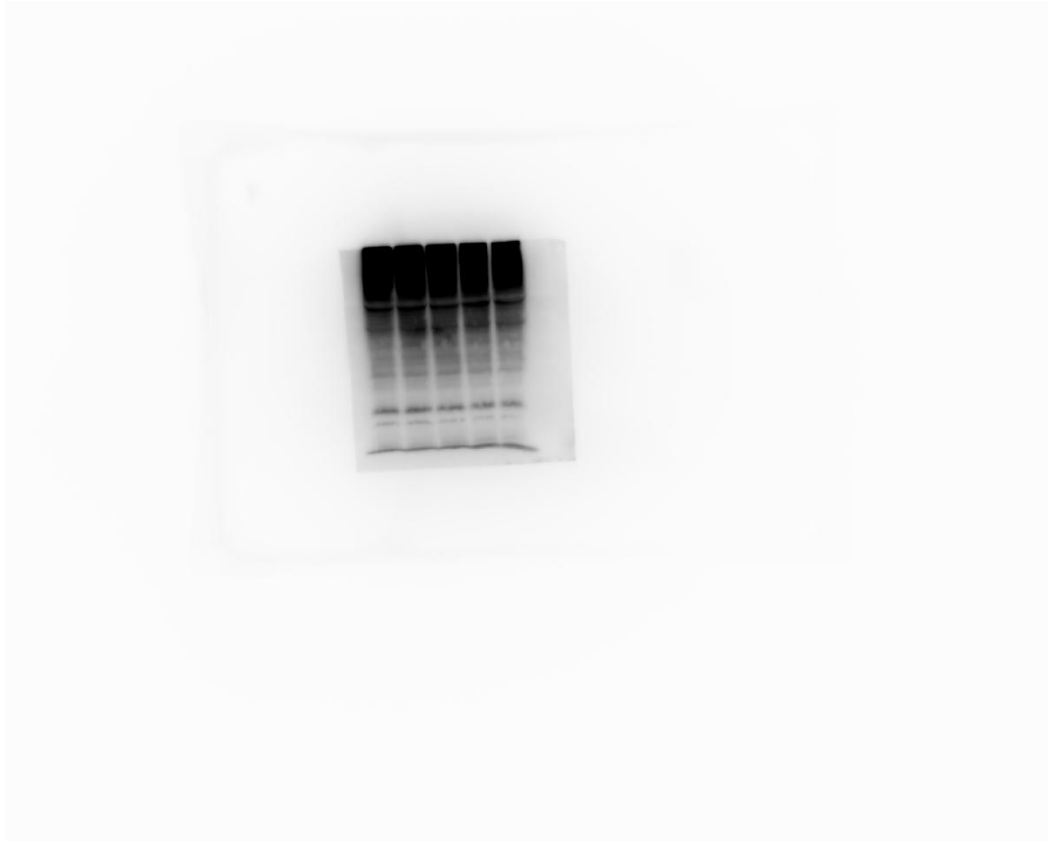

## Flag-Input

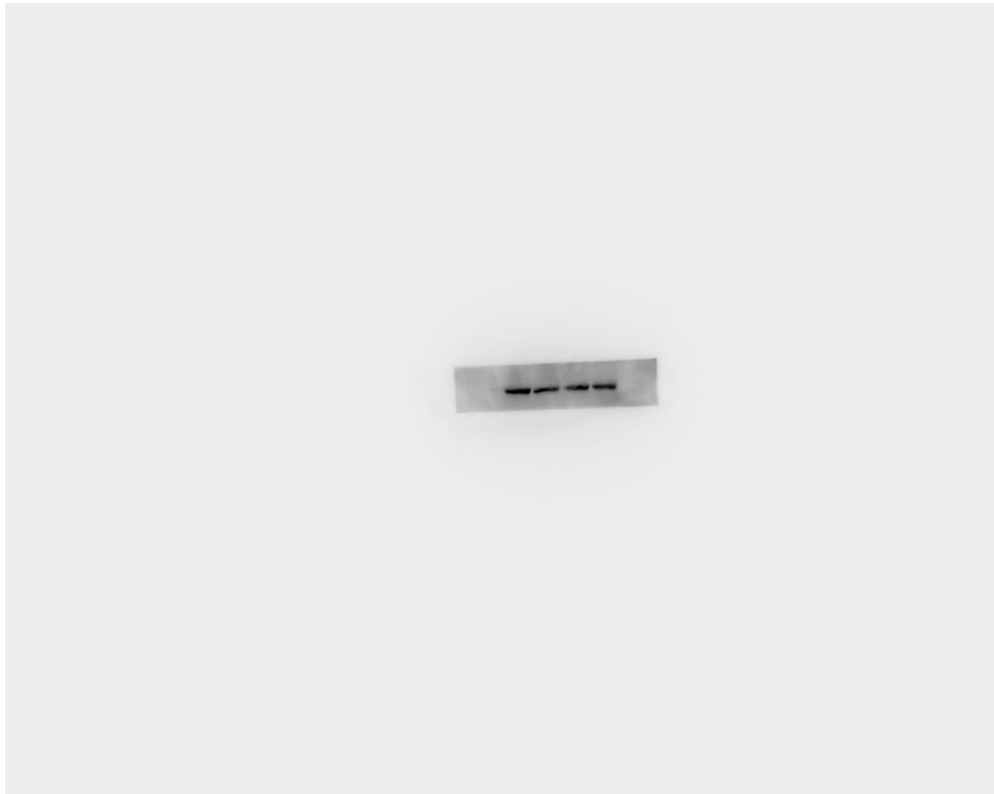

**GFP**

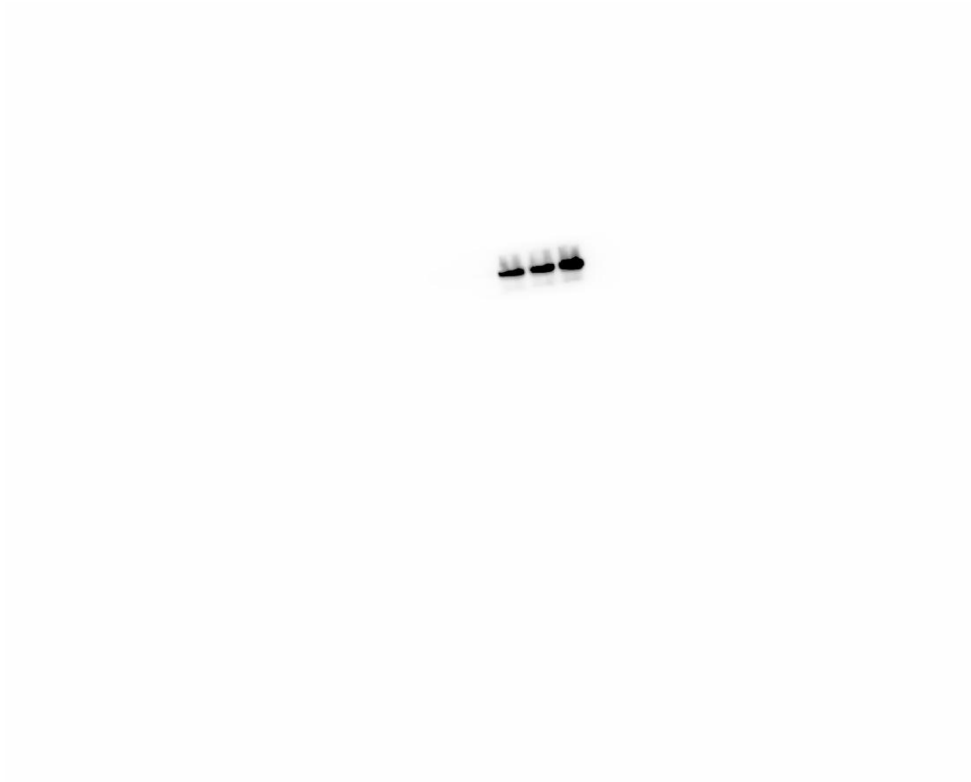

**GAPDH**

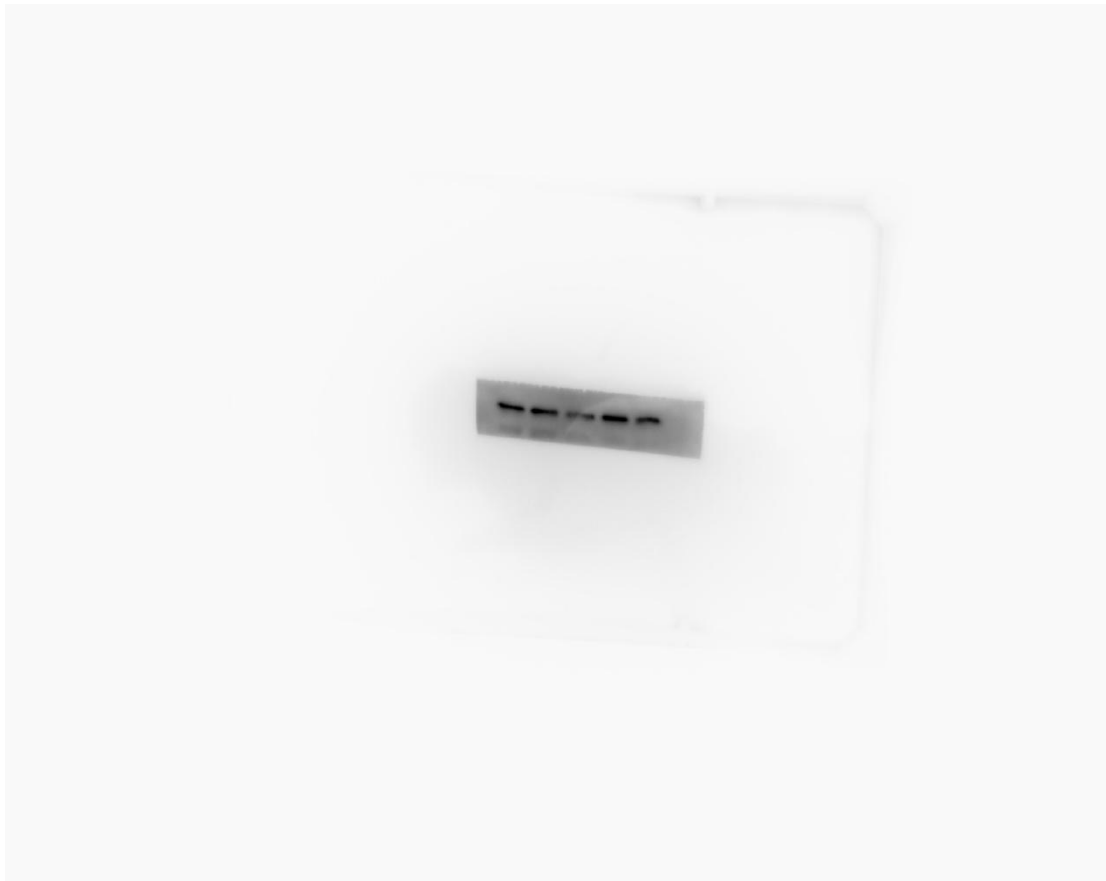

**Fig5I**

**HA-Ub-IP**

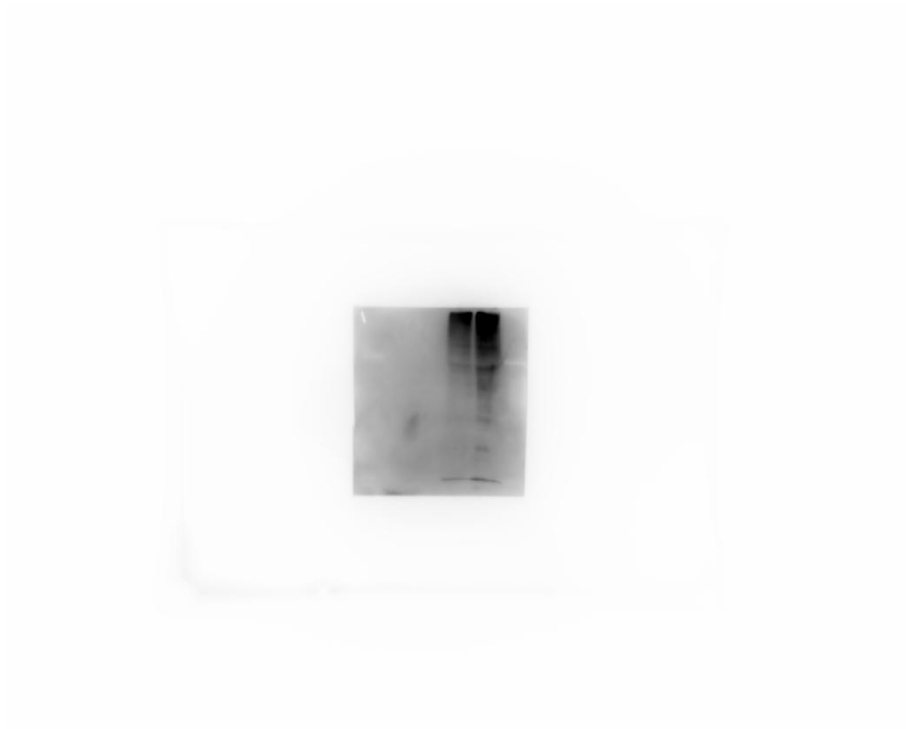

**Flag-IP**

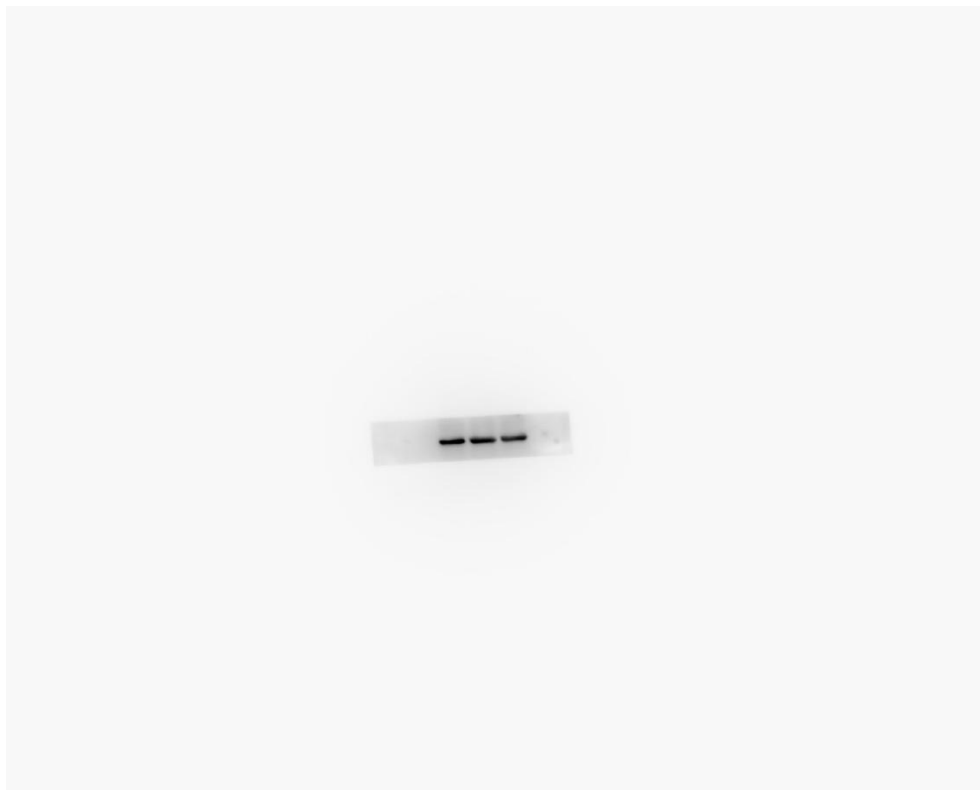

### HA-Ub-Input

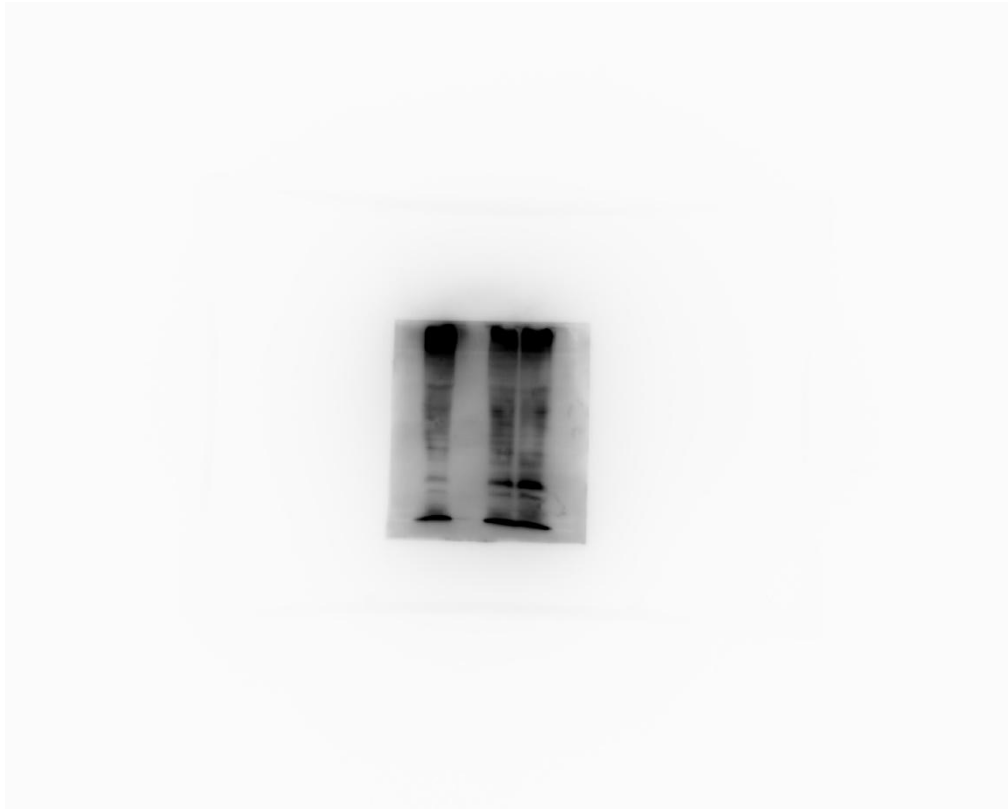

### Flag-Input

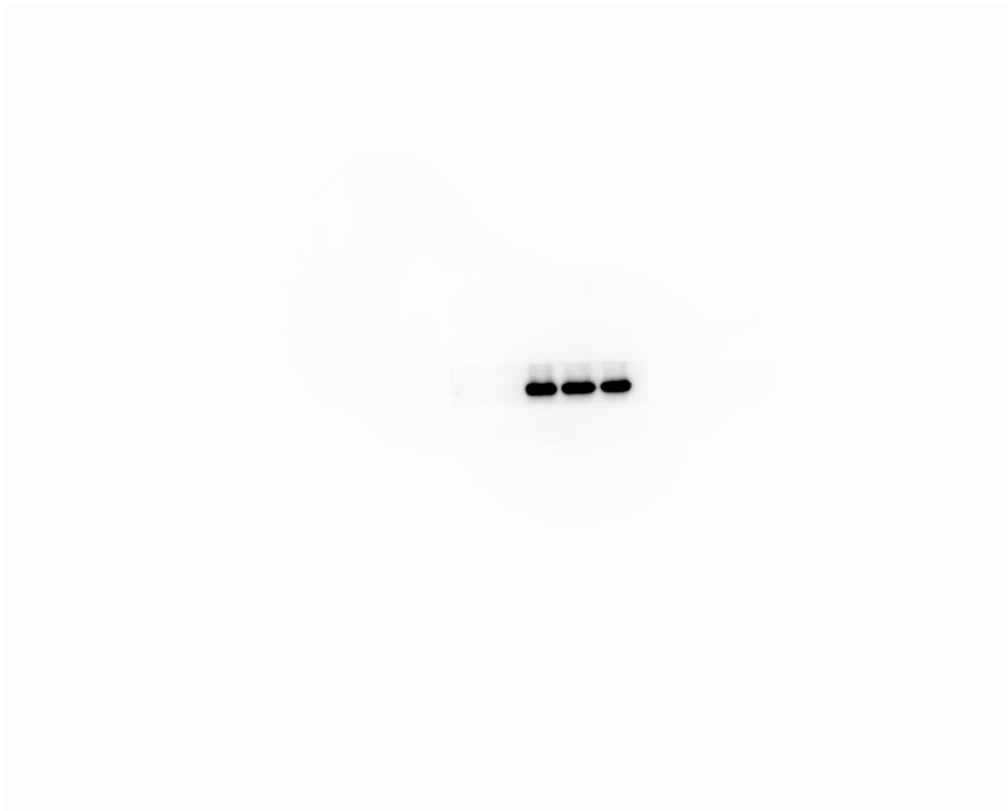

**FBXO7**

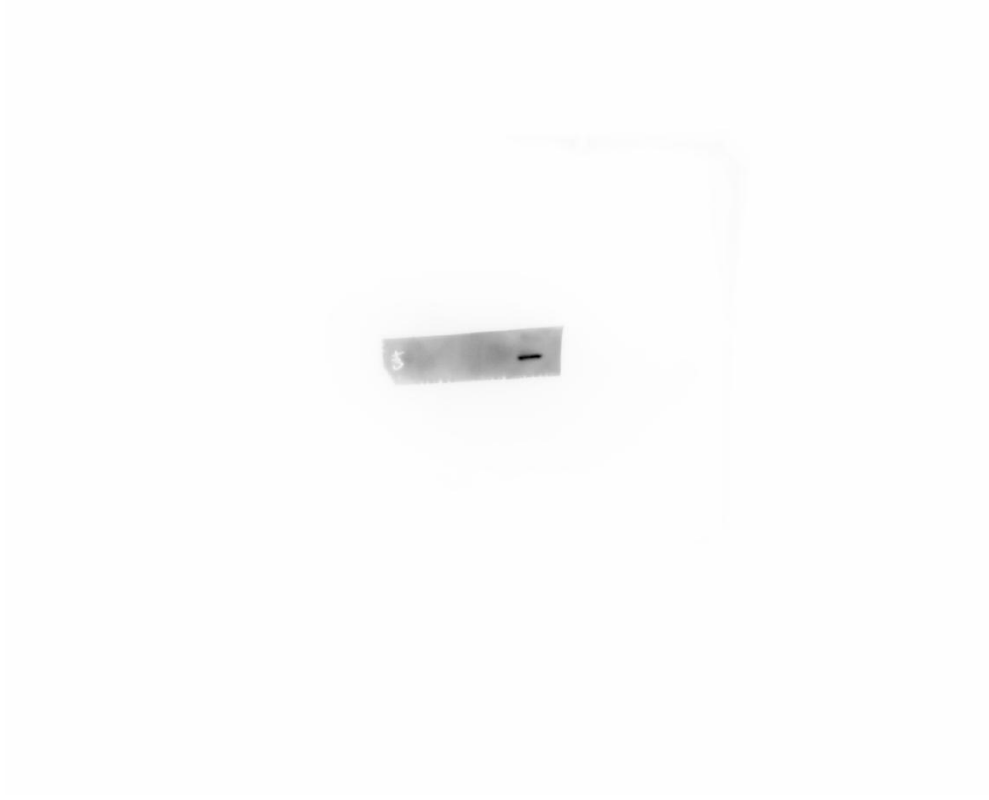

**GAPDH**

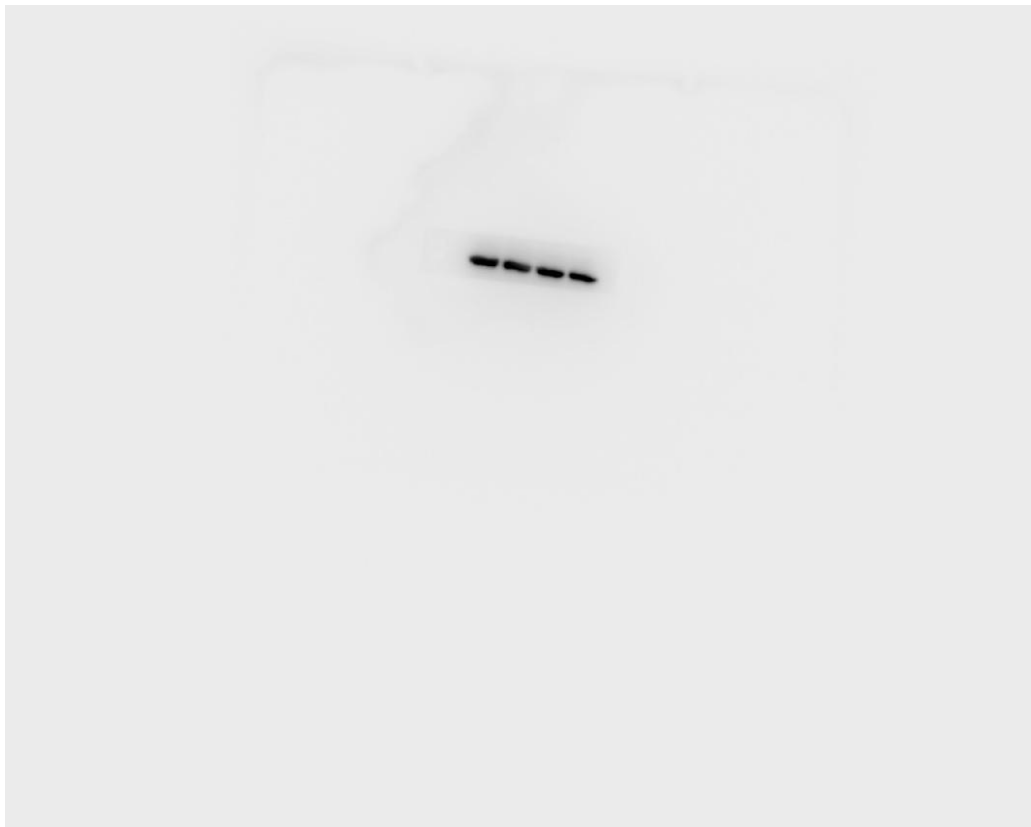

**Fig5J**

**Ub-IP**

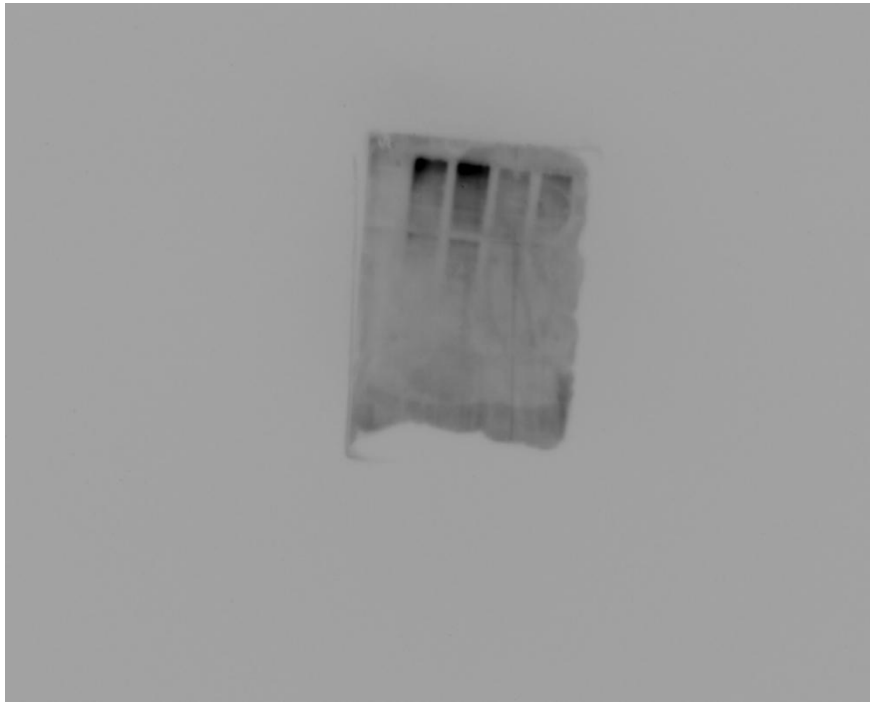

**MED12-IP**

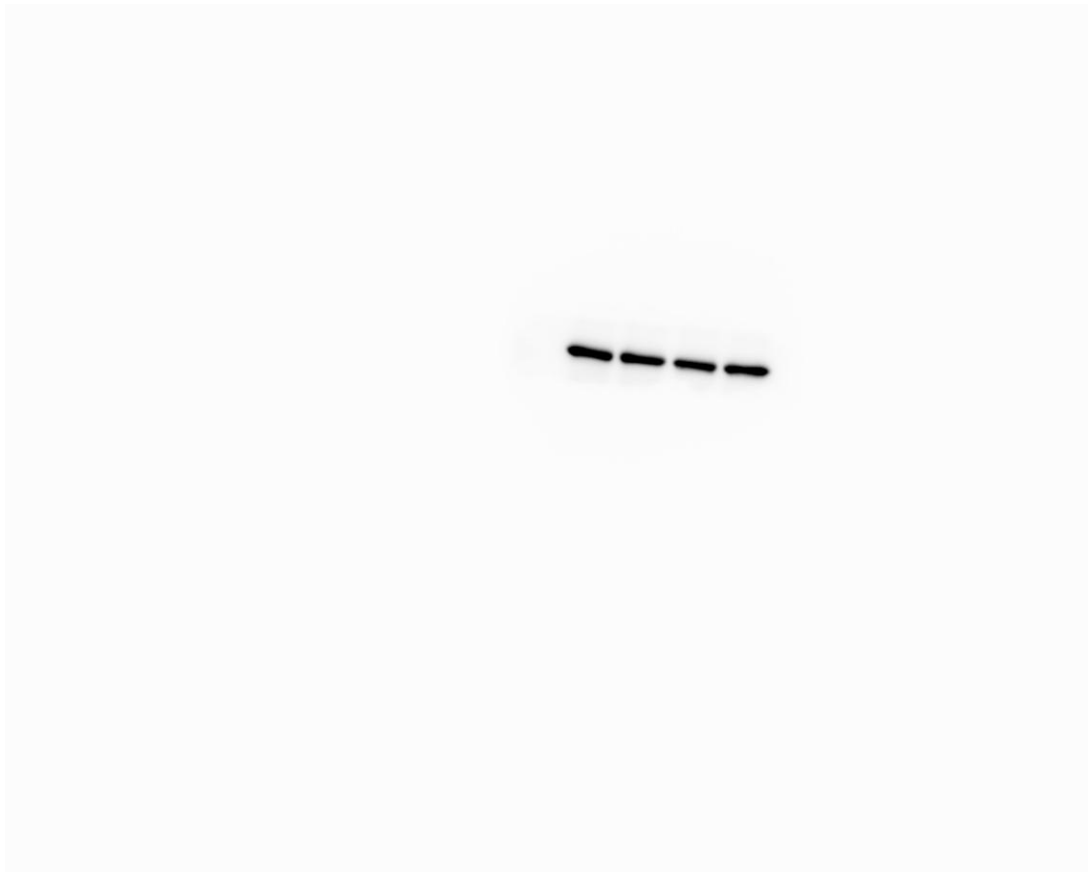

**Ub-Input**

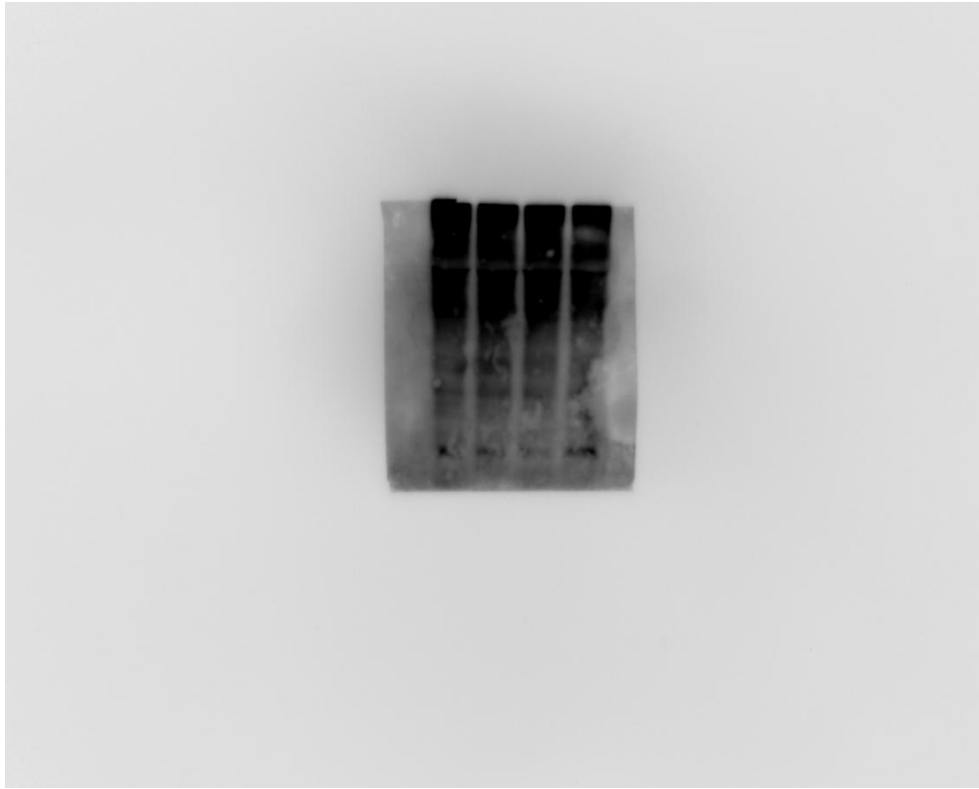

**MED12-Input**

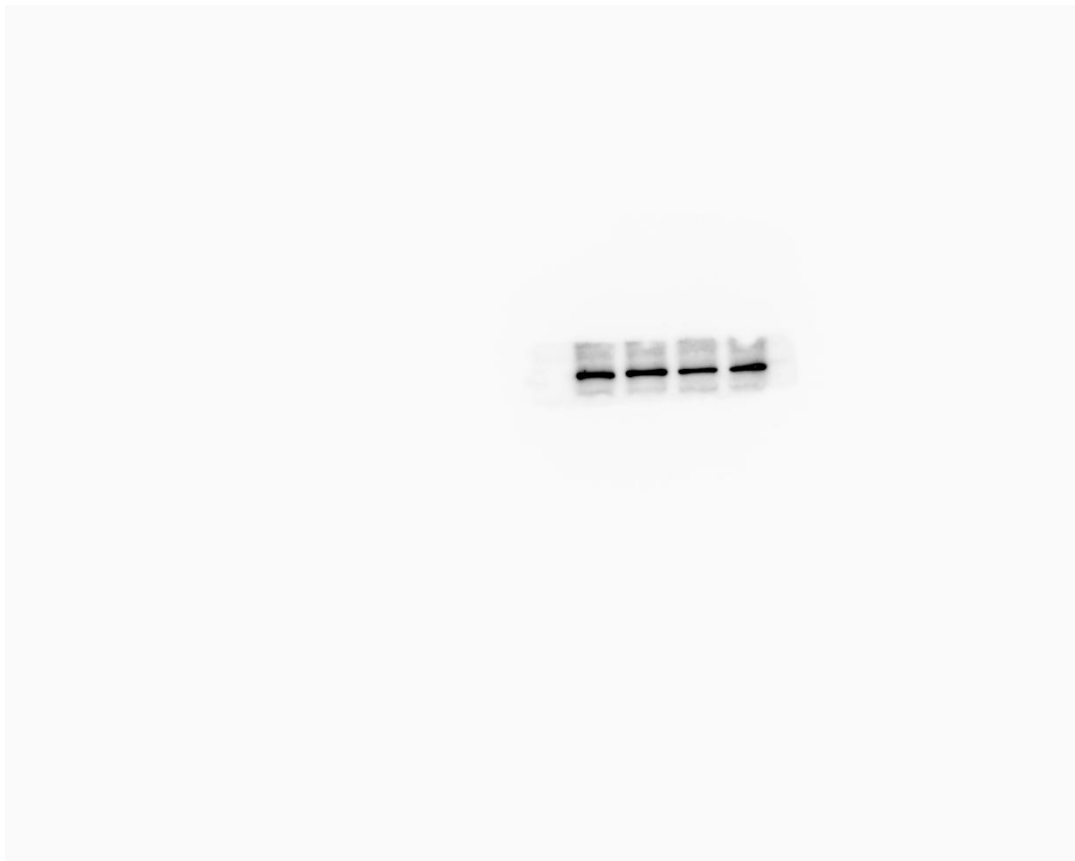

**GFP-Input**

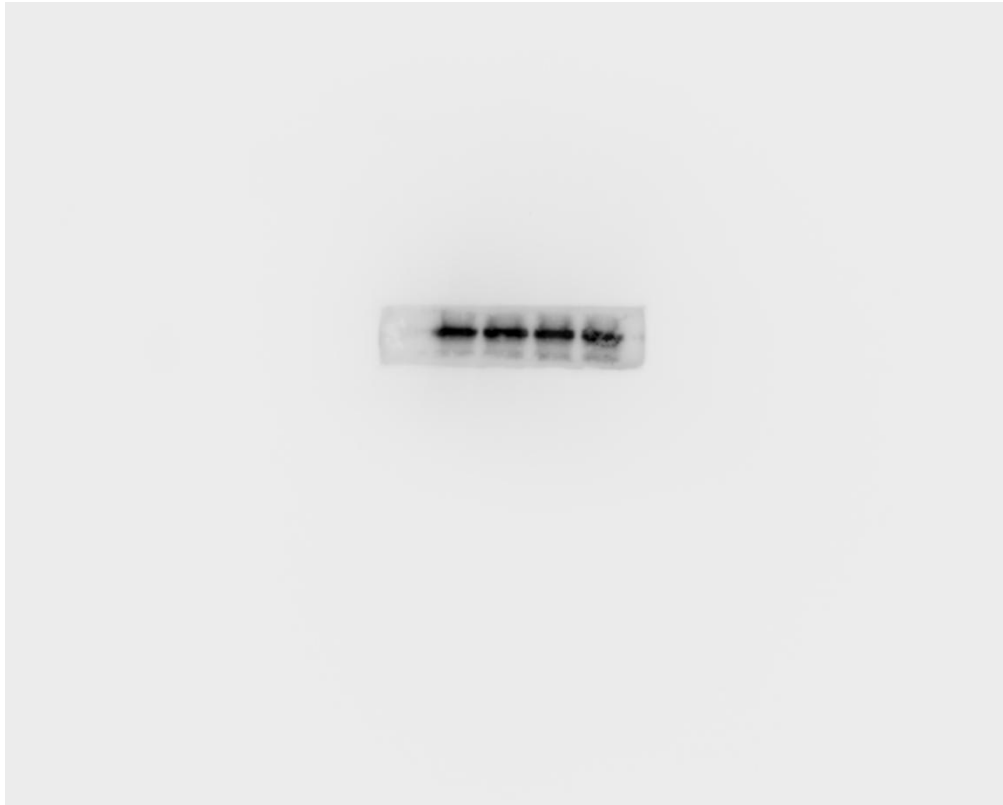

**GAPDH**

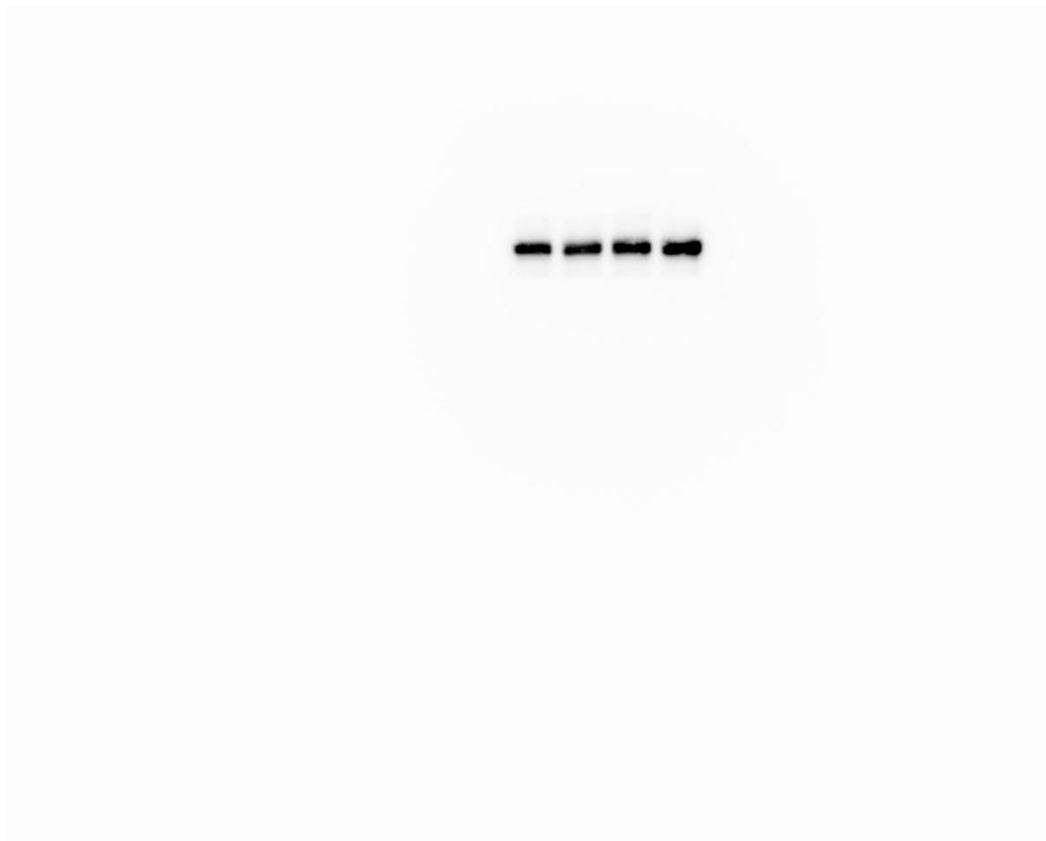

**Fig5K**

**Ub-IP**

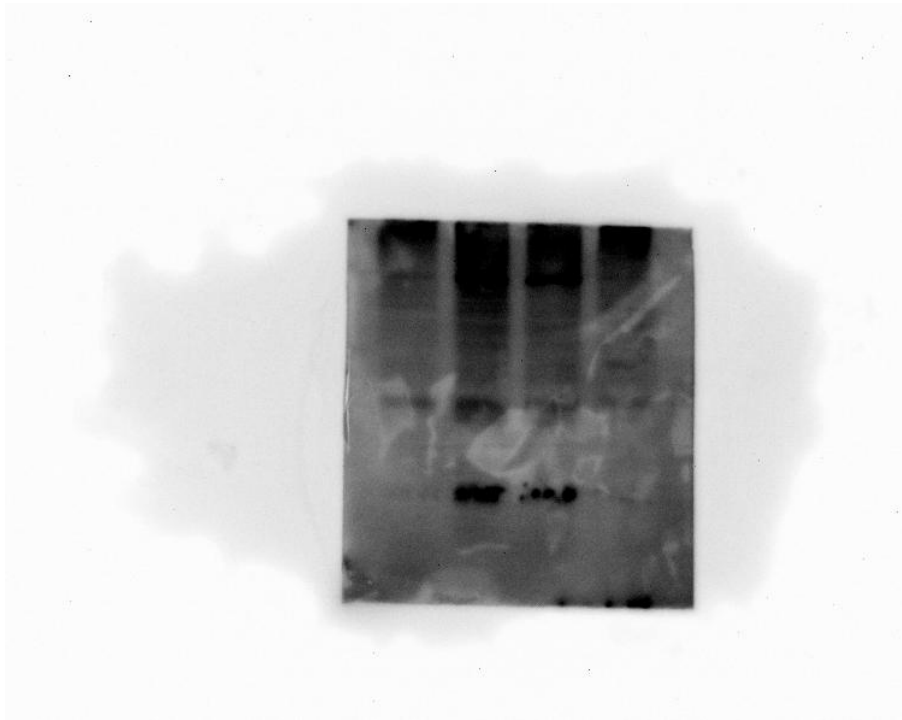

**MED12-IP**

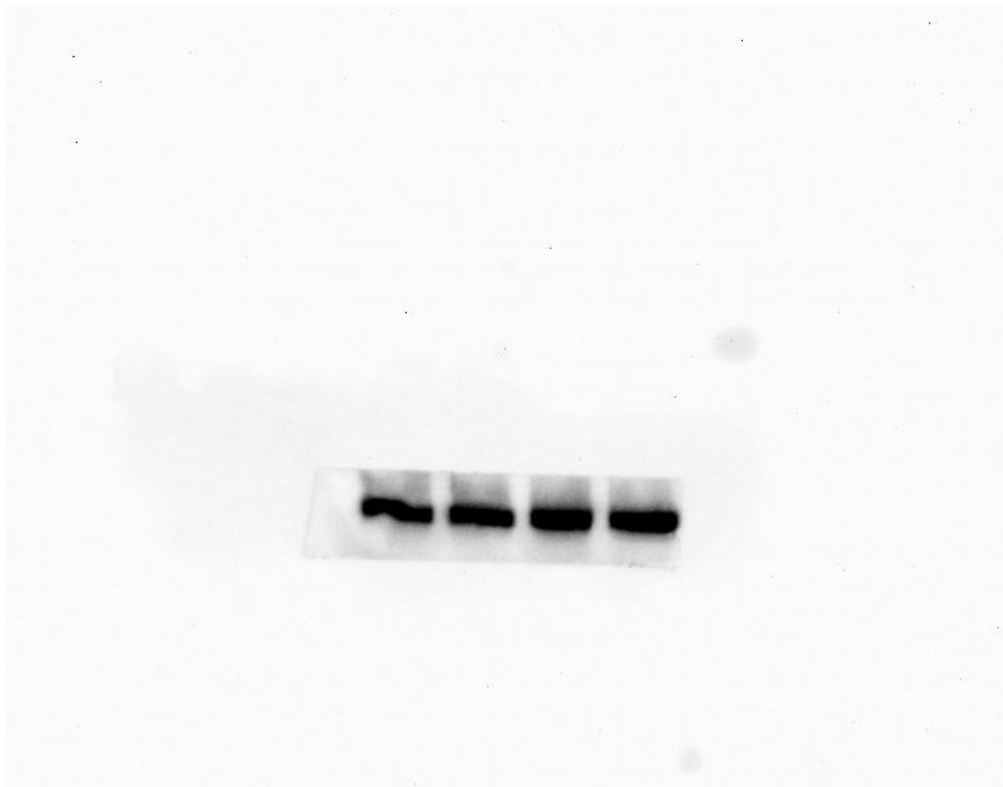

**Ub-Input**

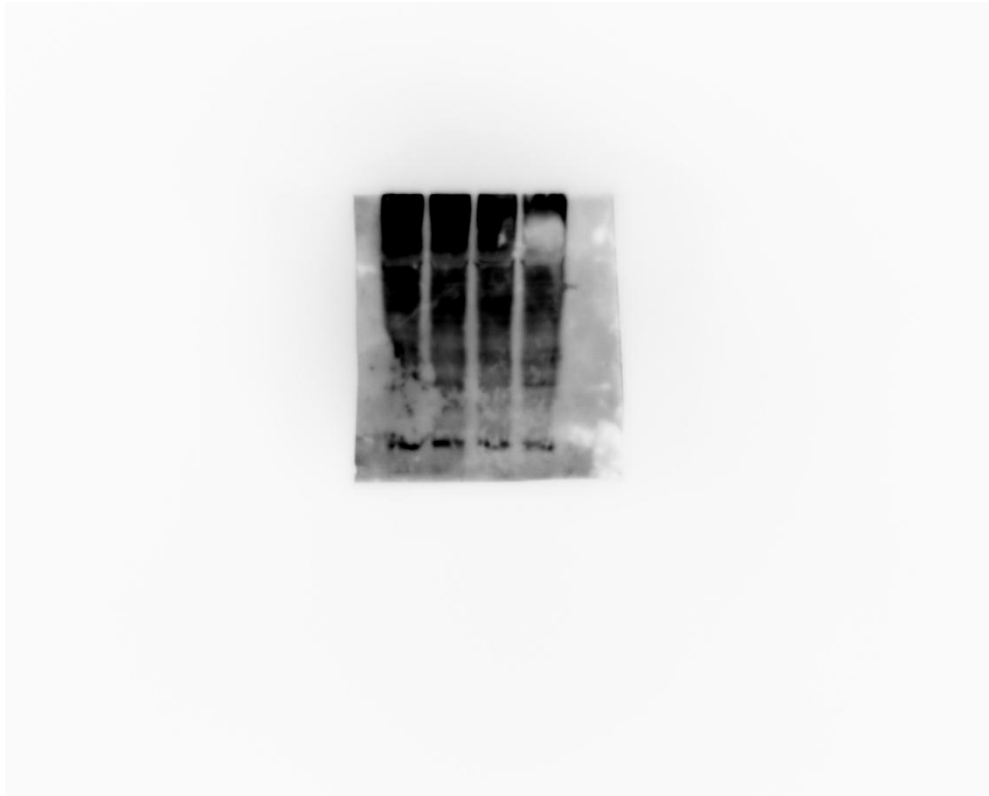

**MED12-Input**

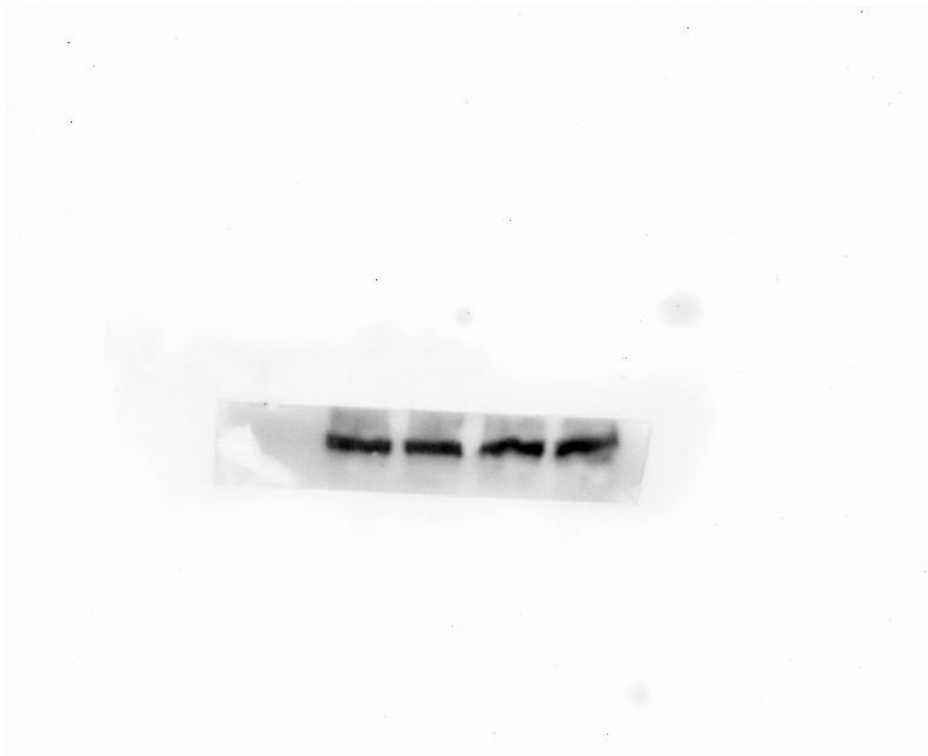

**GFP-Input**

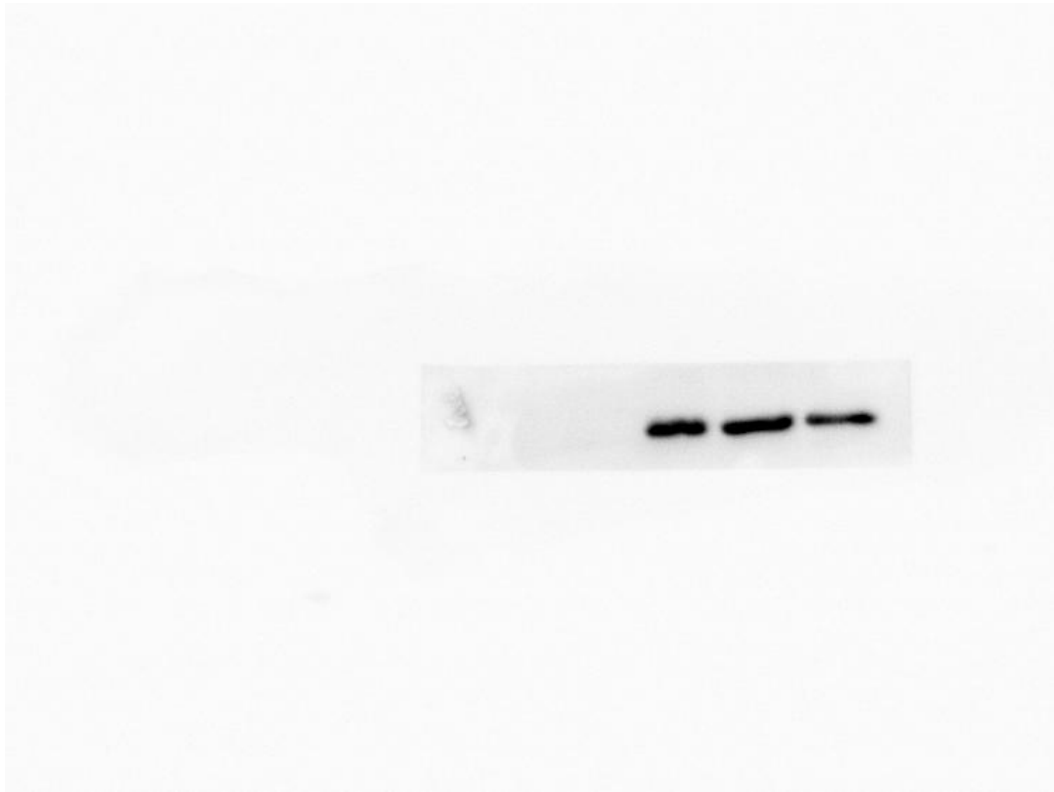

**GAPDH**

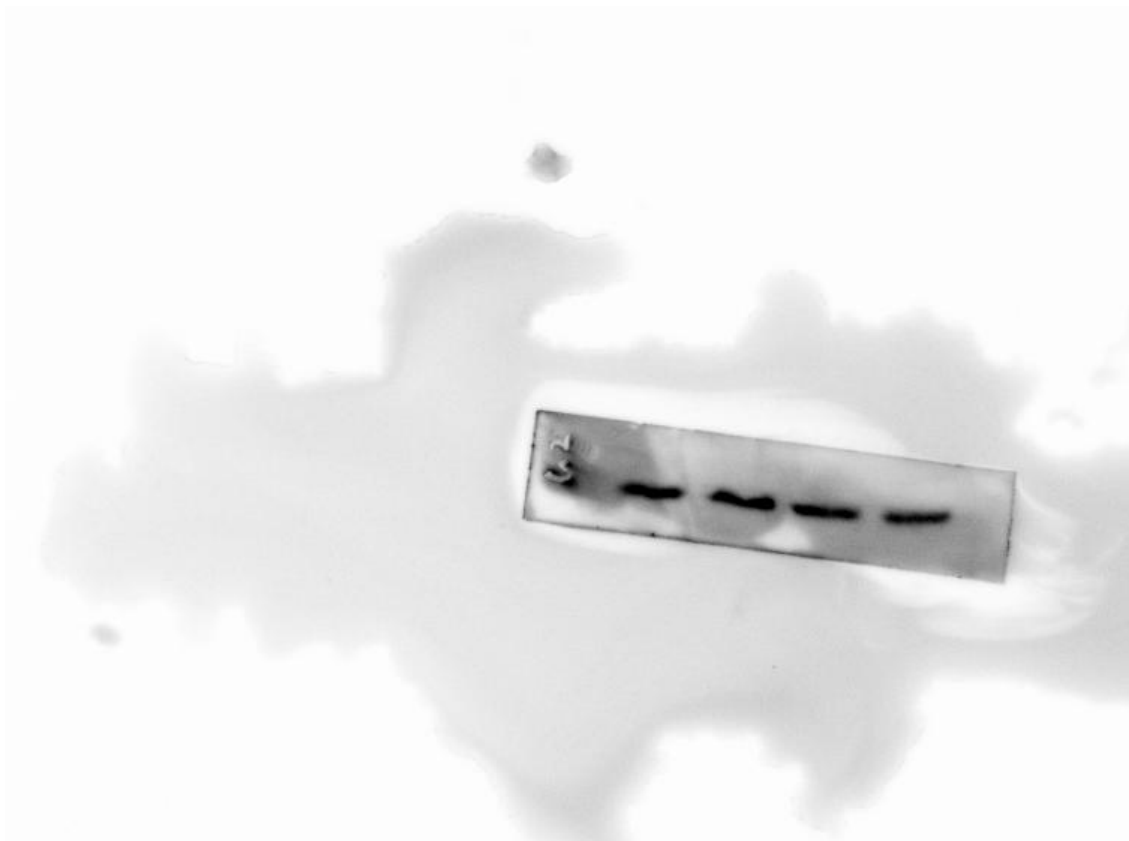

**Fig5L**

**HA-Ub-IP**

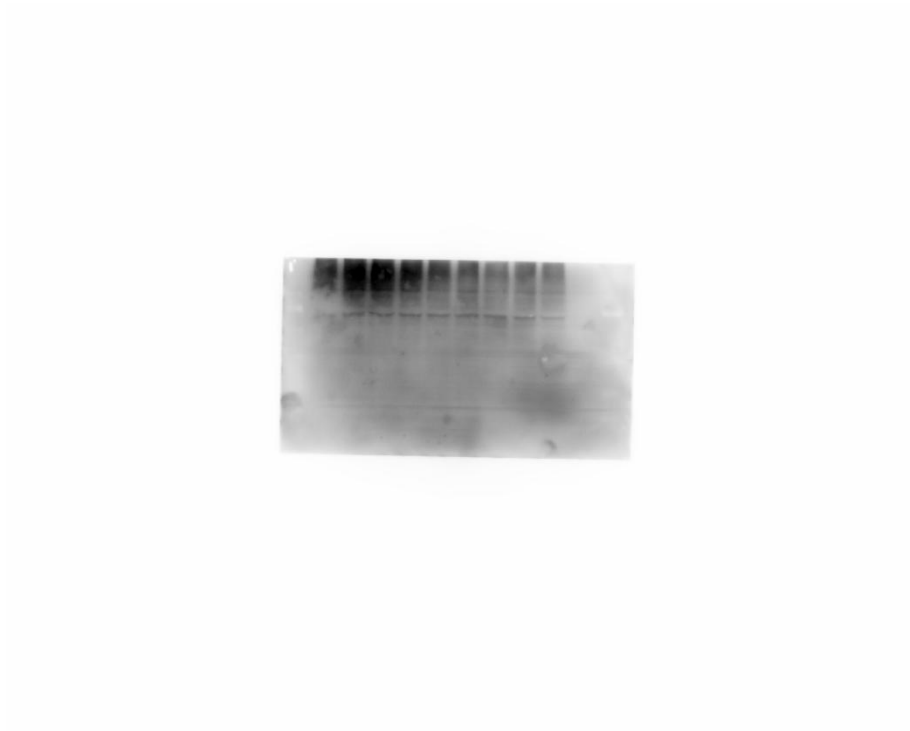

**MED12-IP**

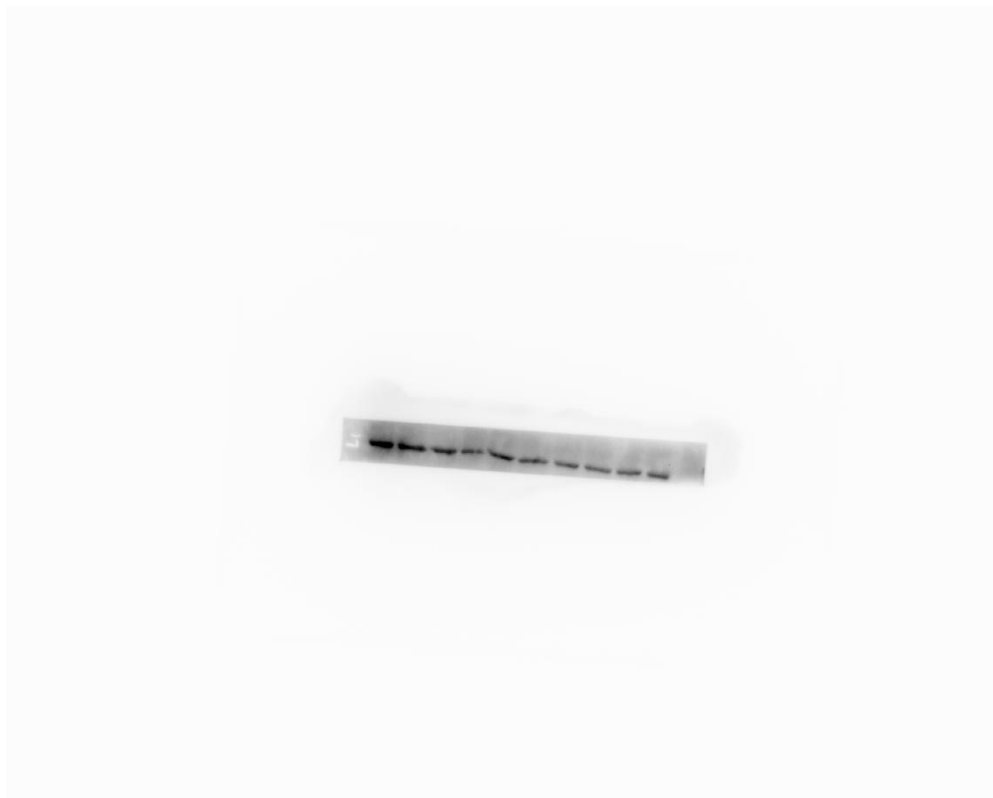

**HA-Ub-IP**

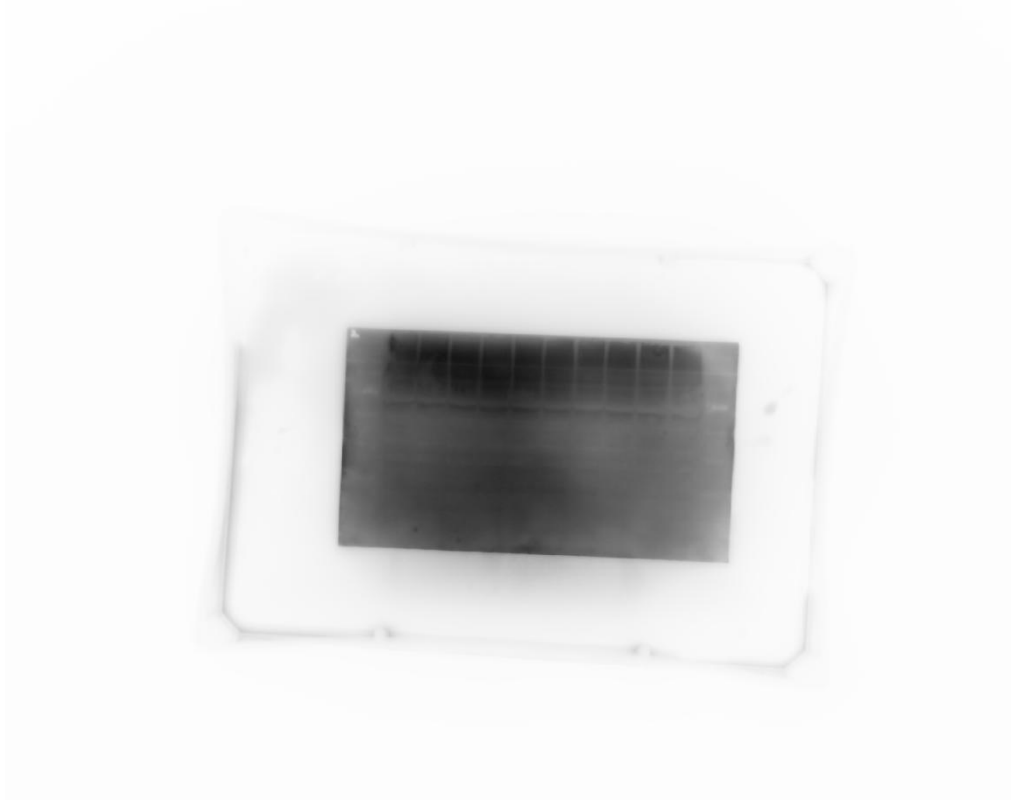

**MED12-Input**

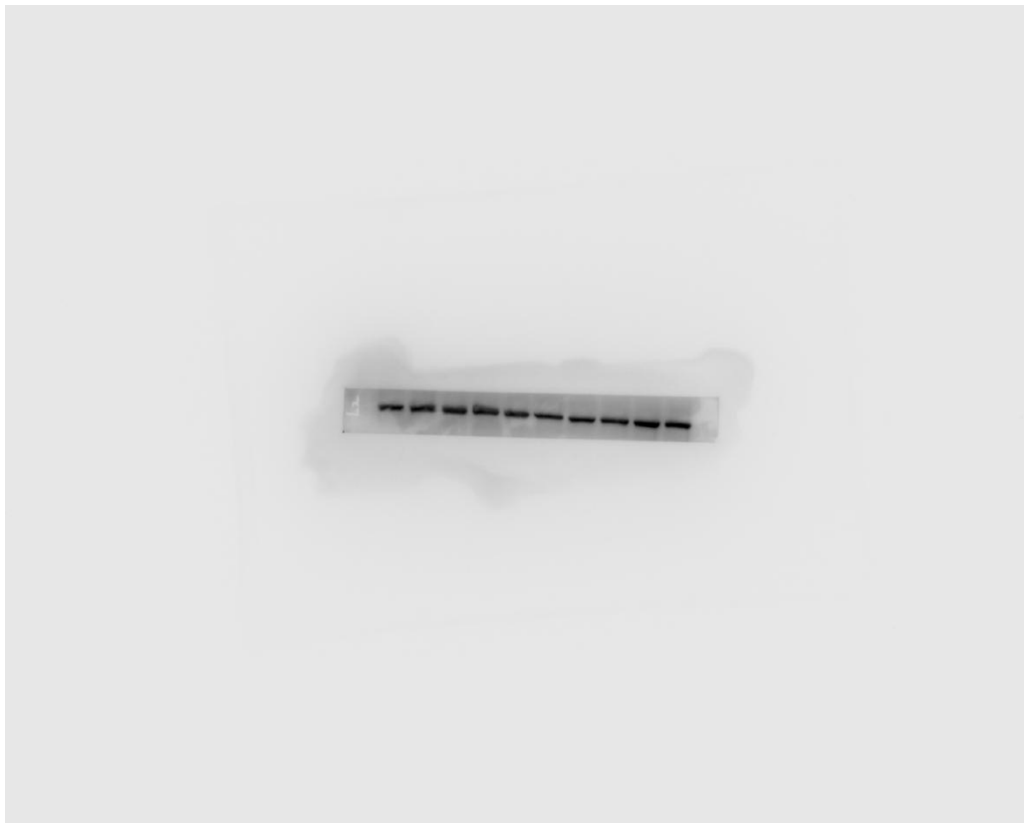

**GAPDH**

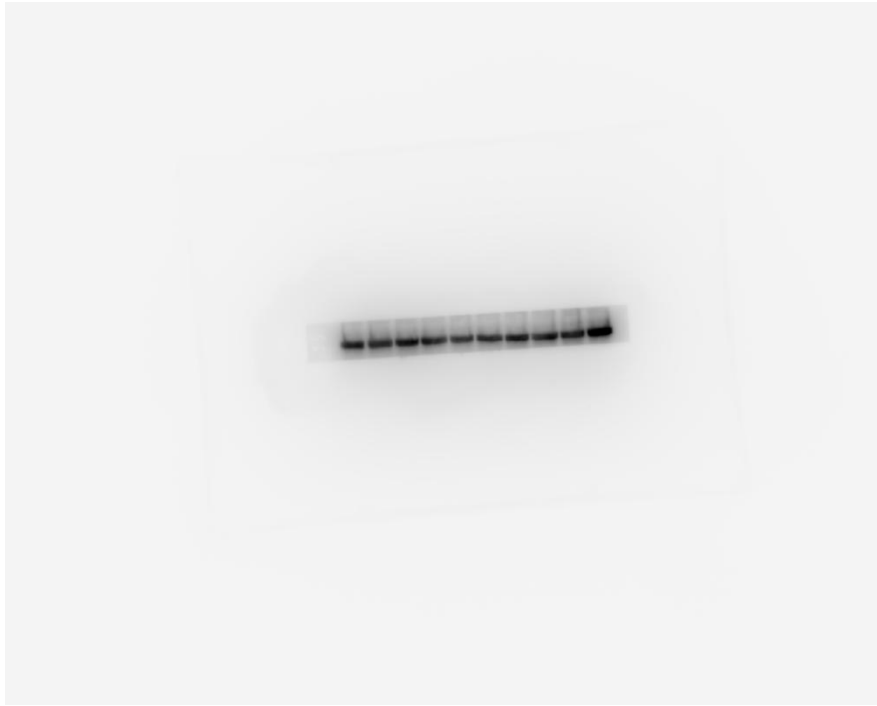

**Fig5M**

**HA-Ub-IP**

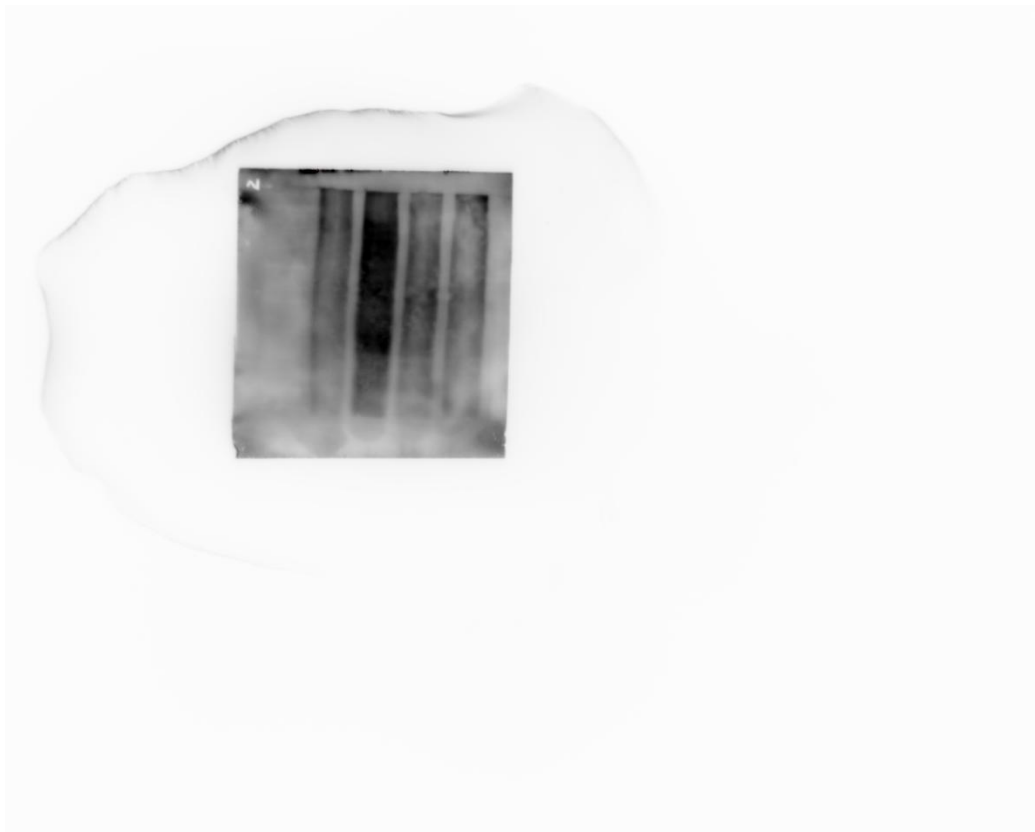

**Flag-IP**

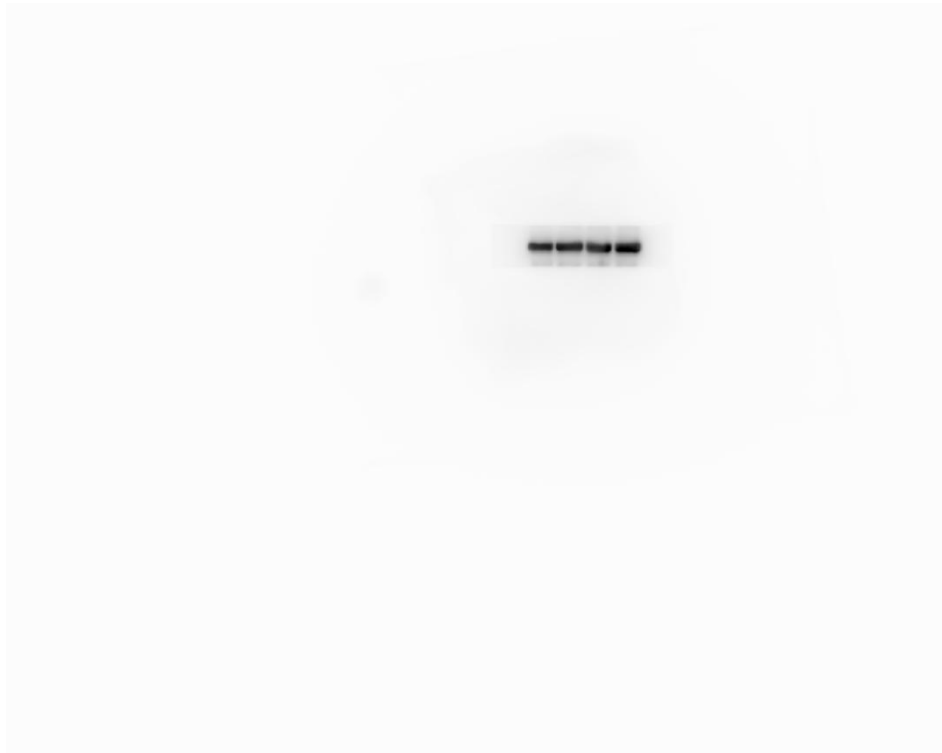

**HA-Ub-Input**

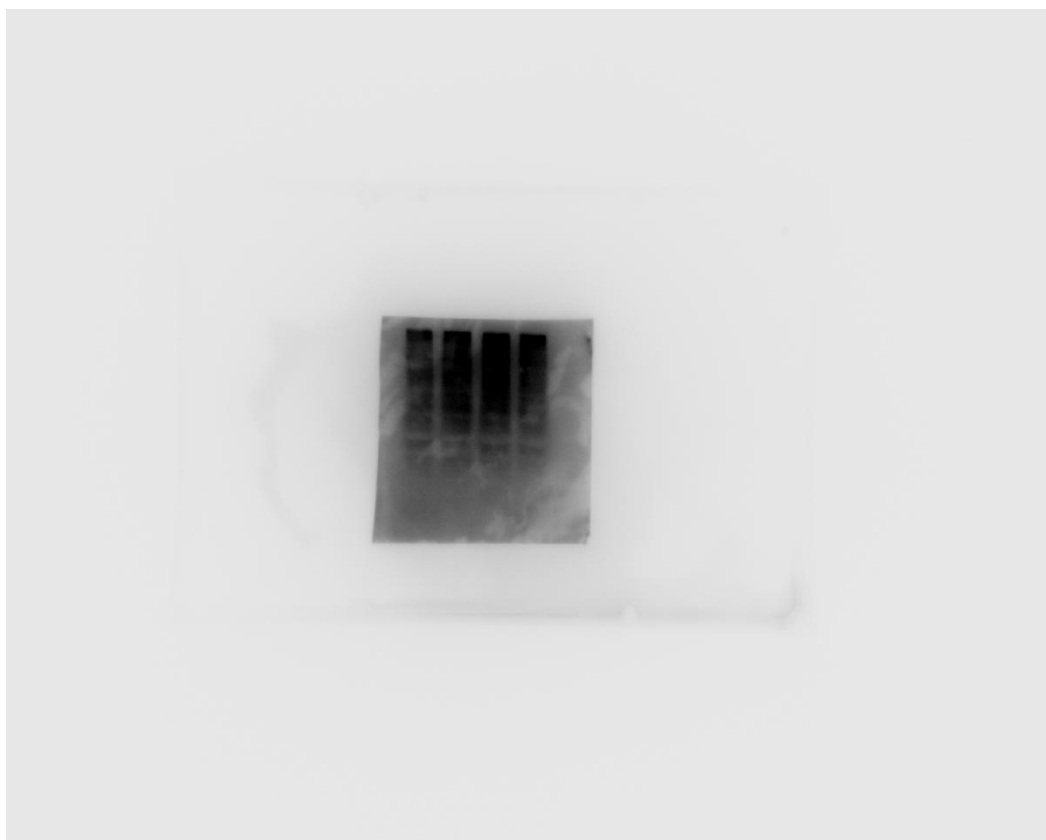

**Flag-Input**

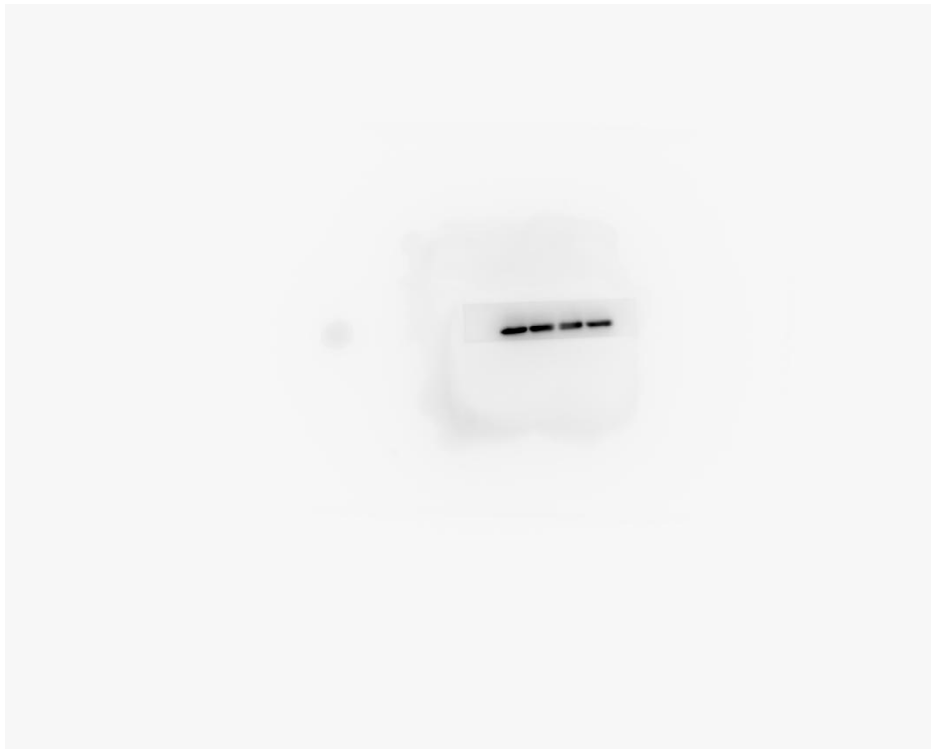

**GFP-Input**

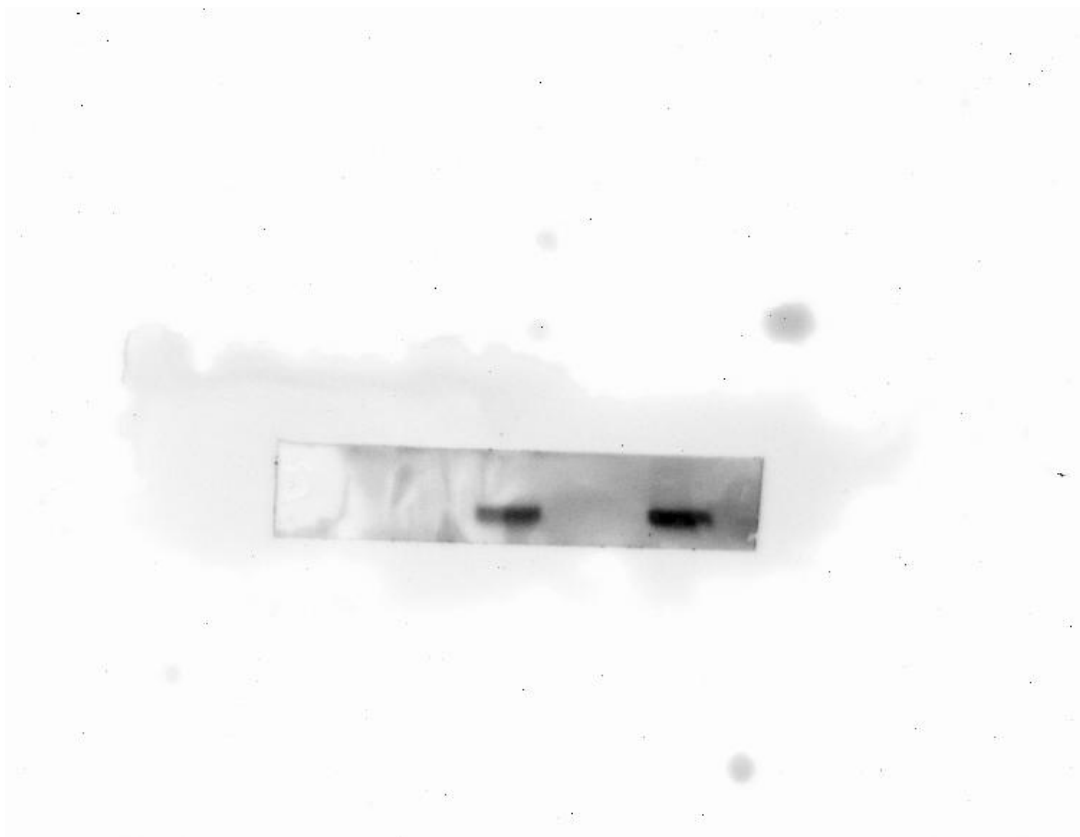

**GAPDH**

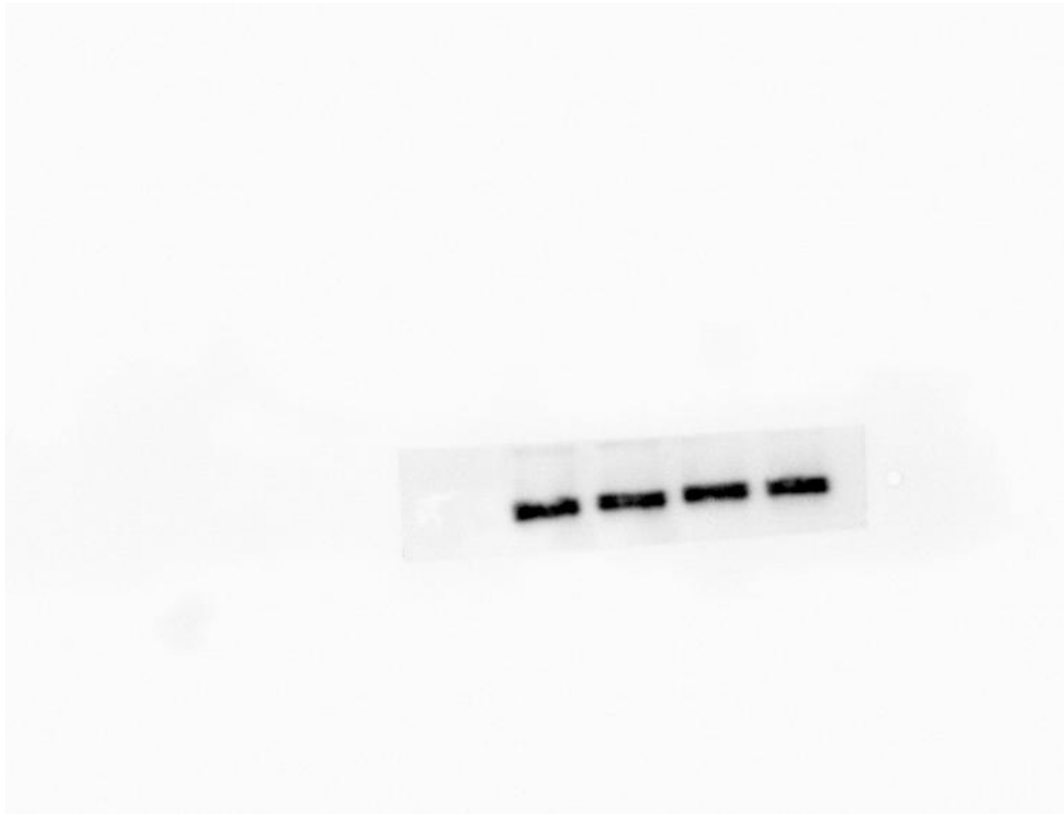

**Fig6F**

**pp53**

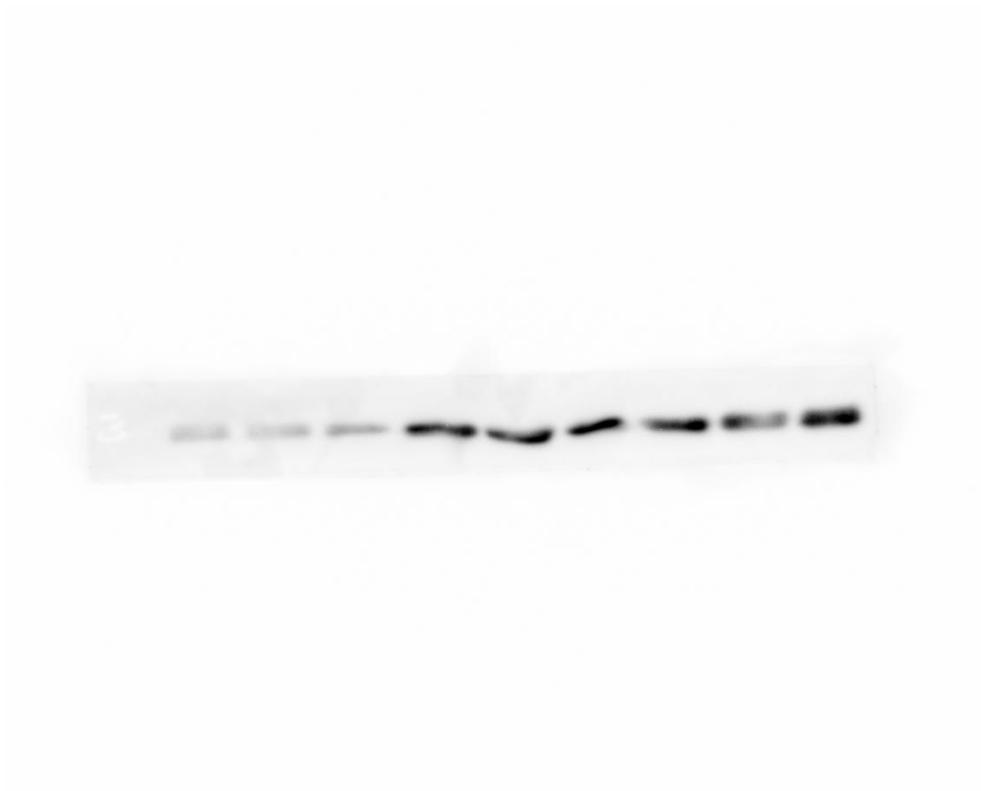

**p53**

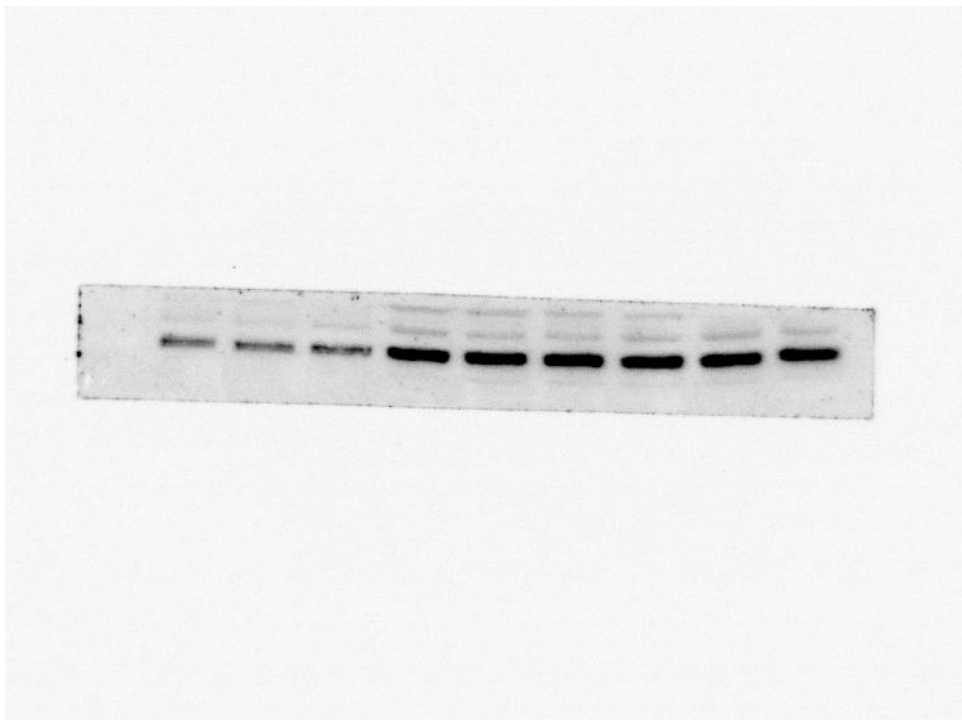

**p21**

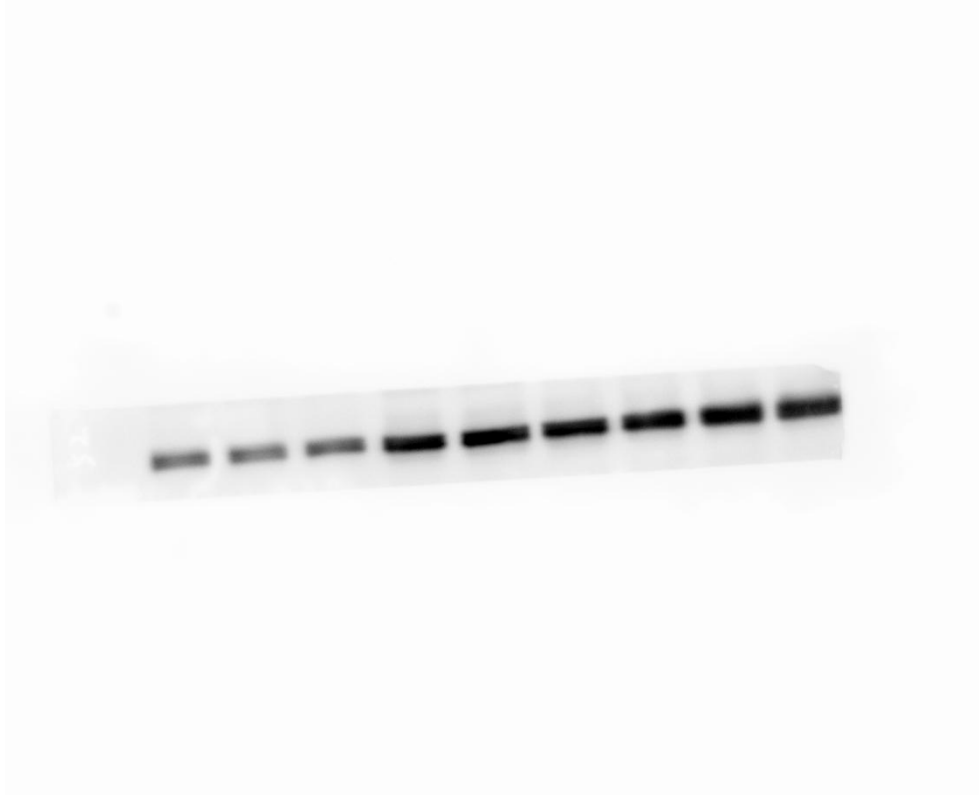

**p16**

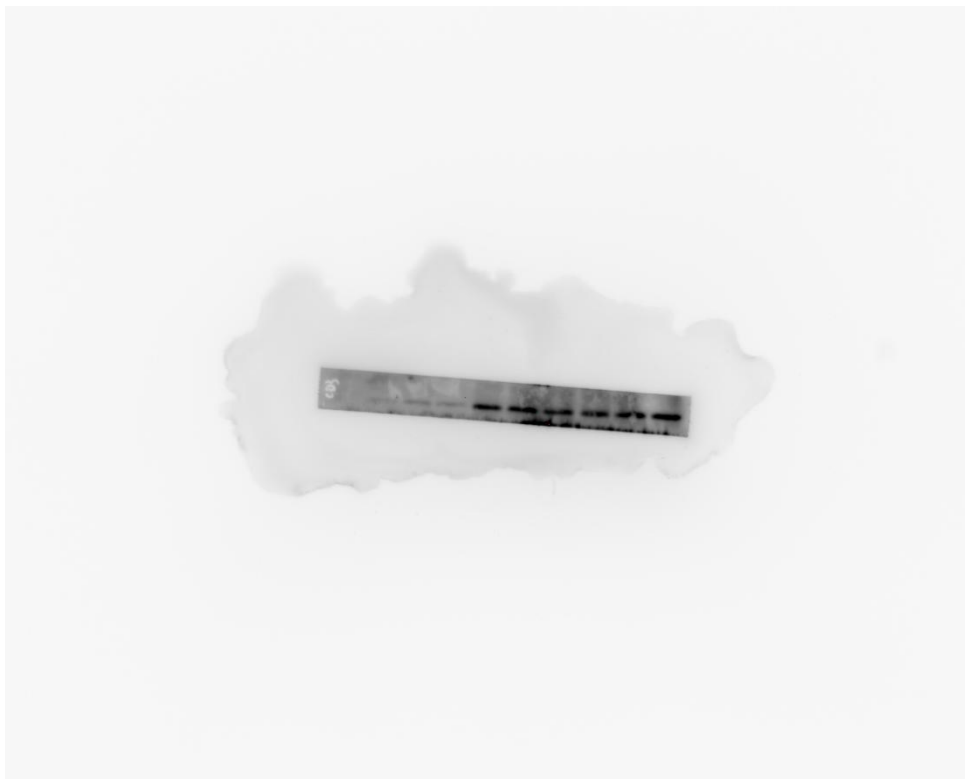

**GAPDH**

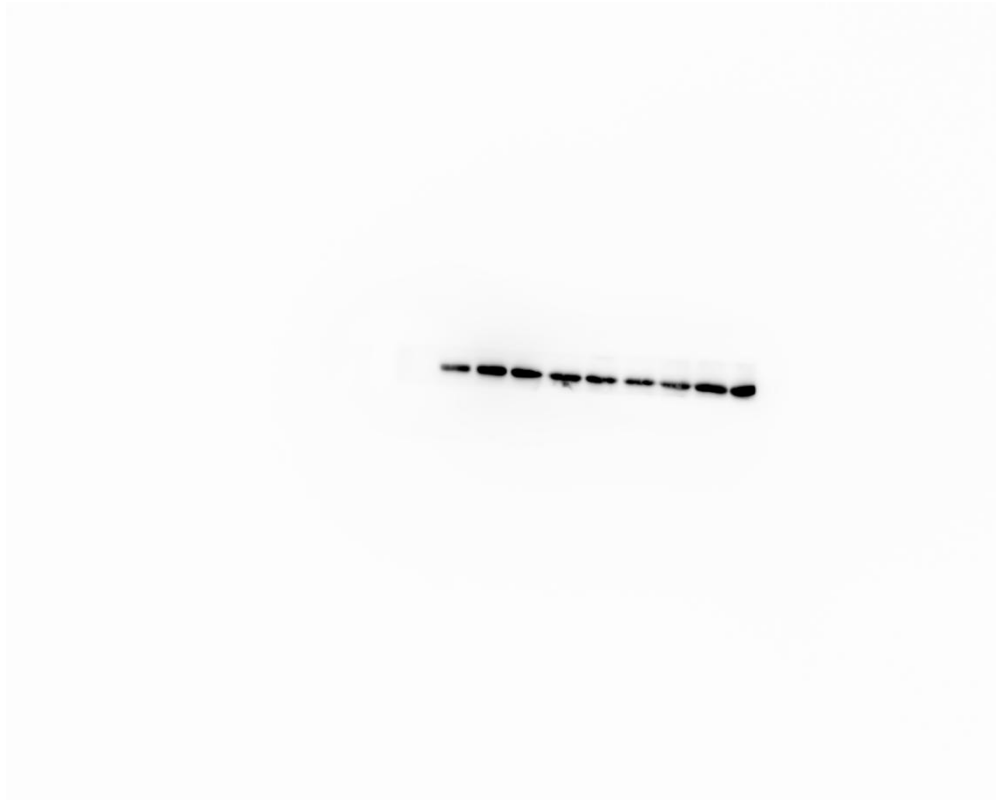

**Fig6H**

**p-TBK1**

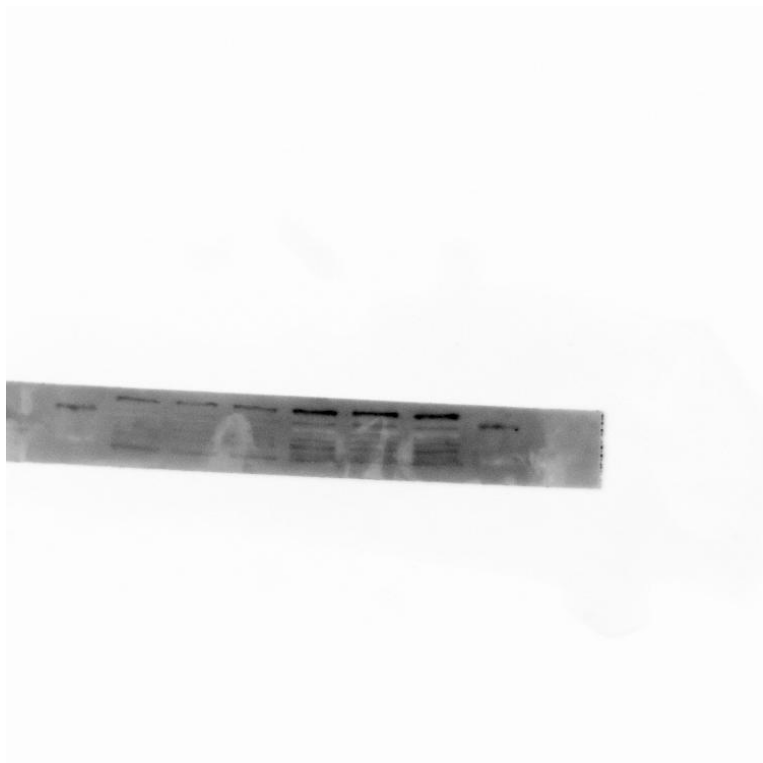

**TBK1**

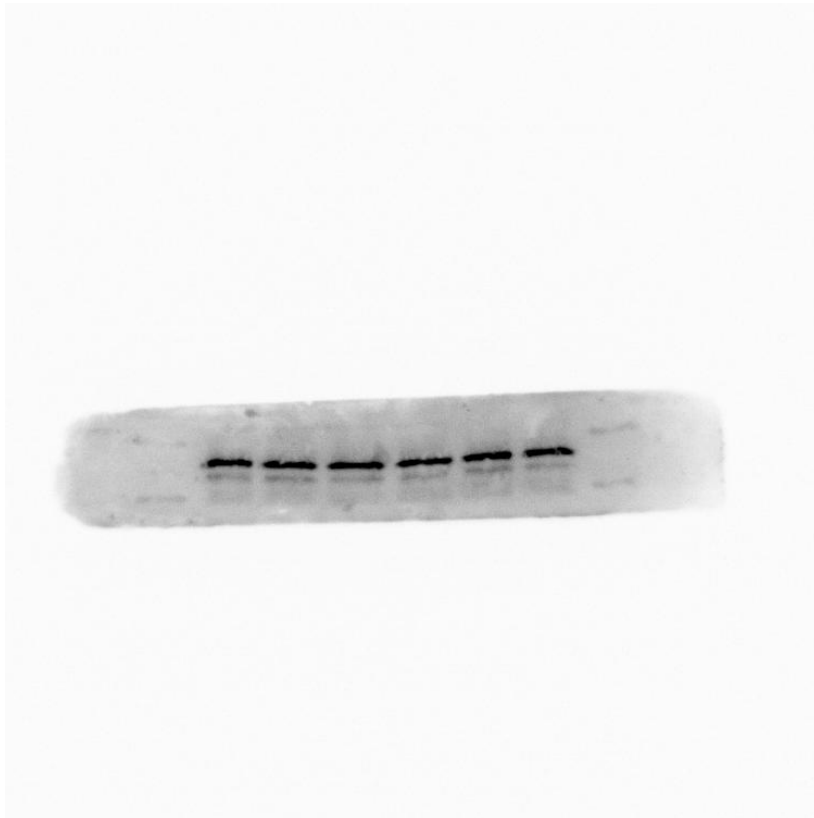

**p-IRF3**

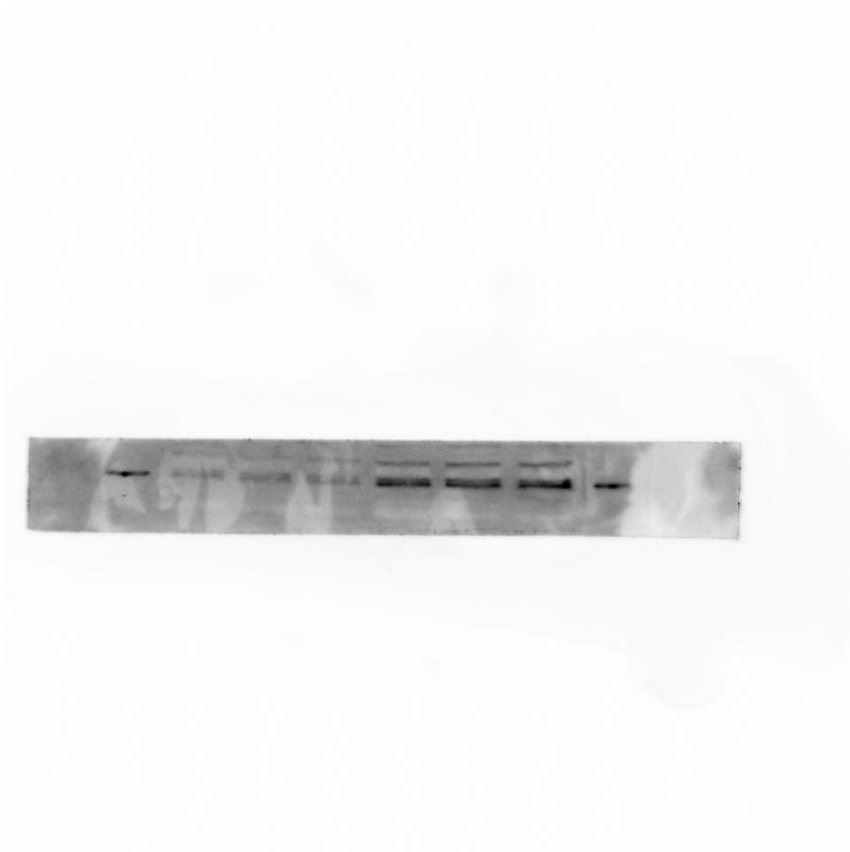

## IRF3

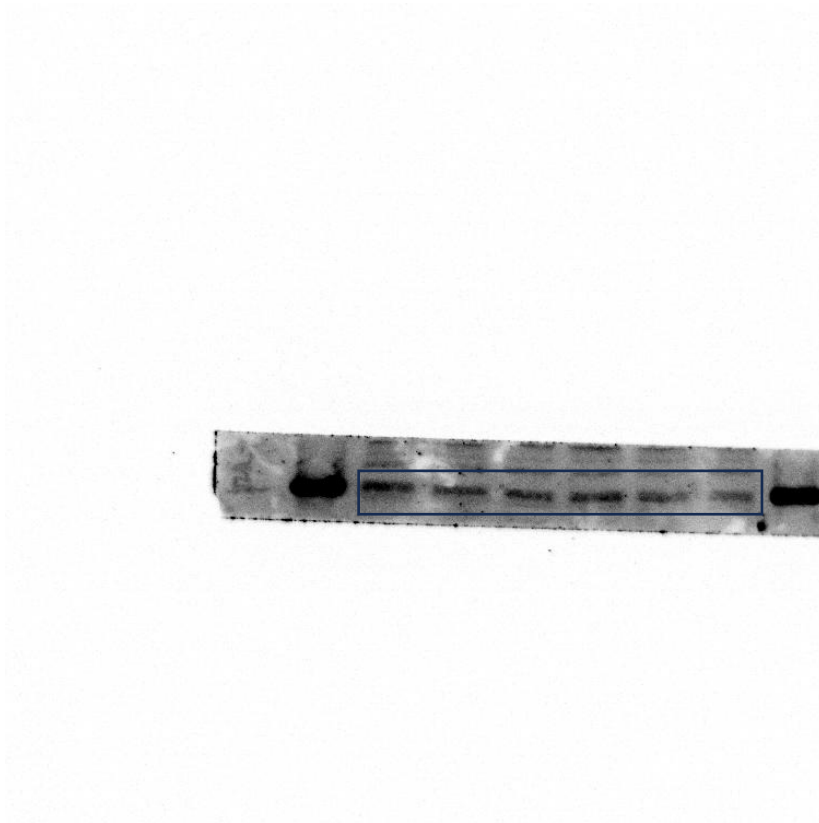

## STING

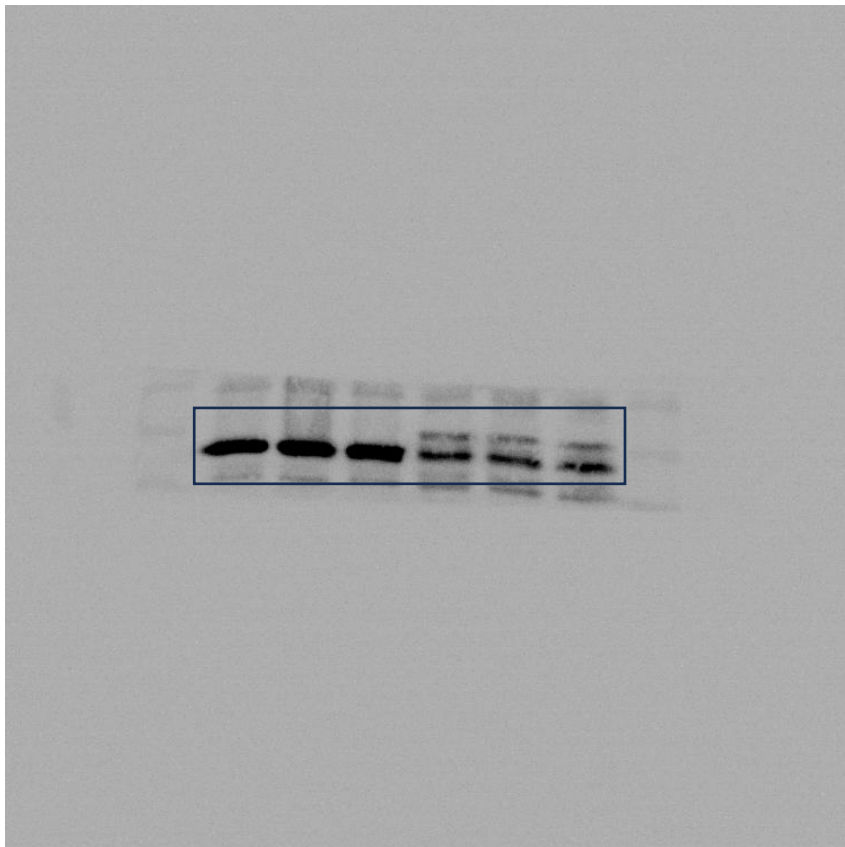

**GAPDH**

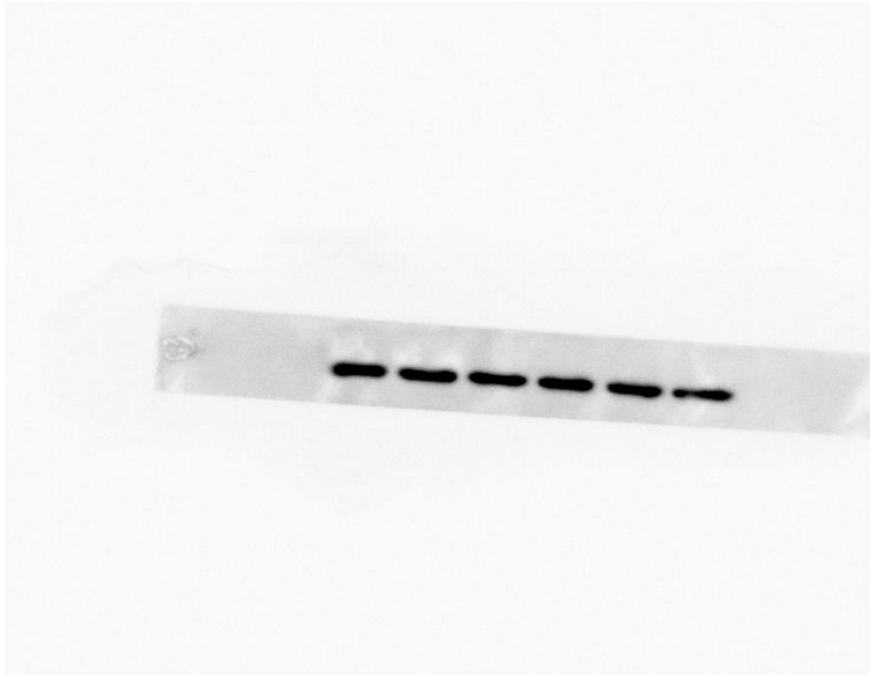

**Fig7D**

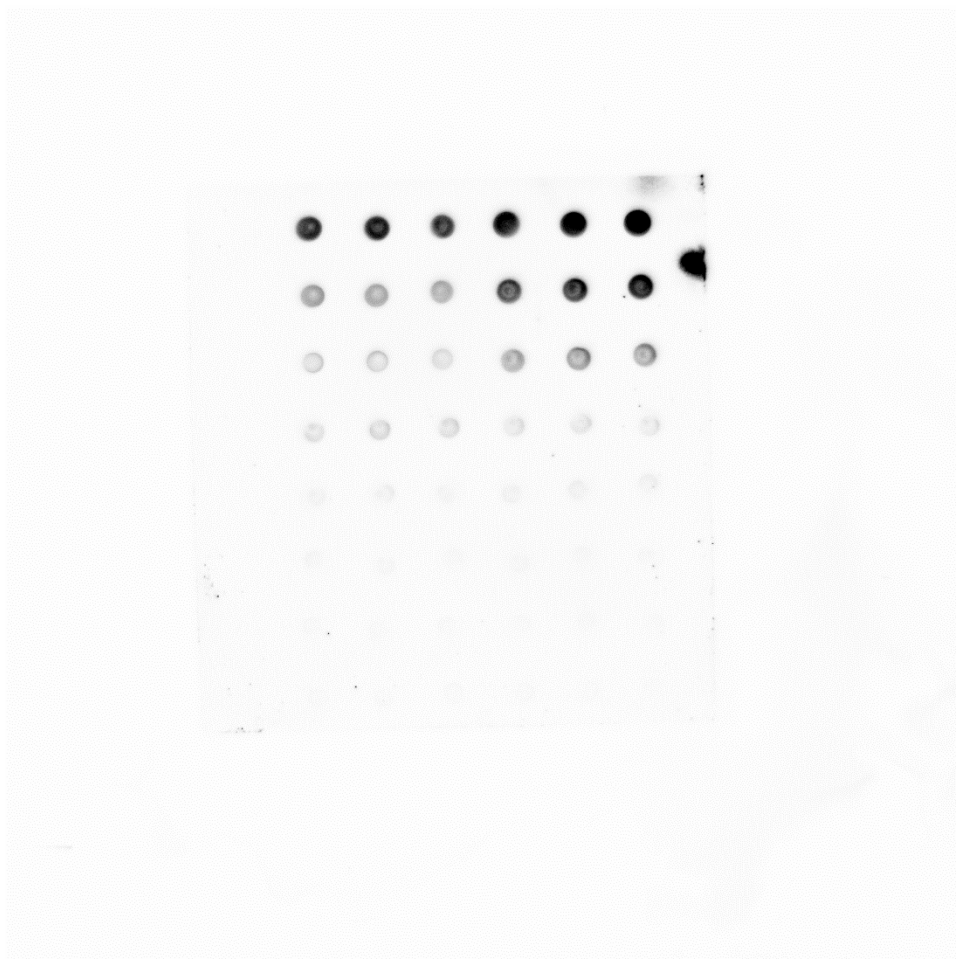

**Fig8A**

**pp53**

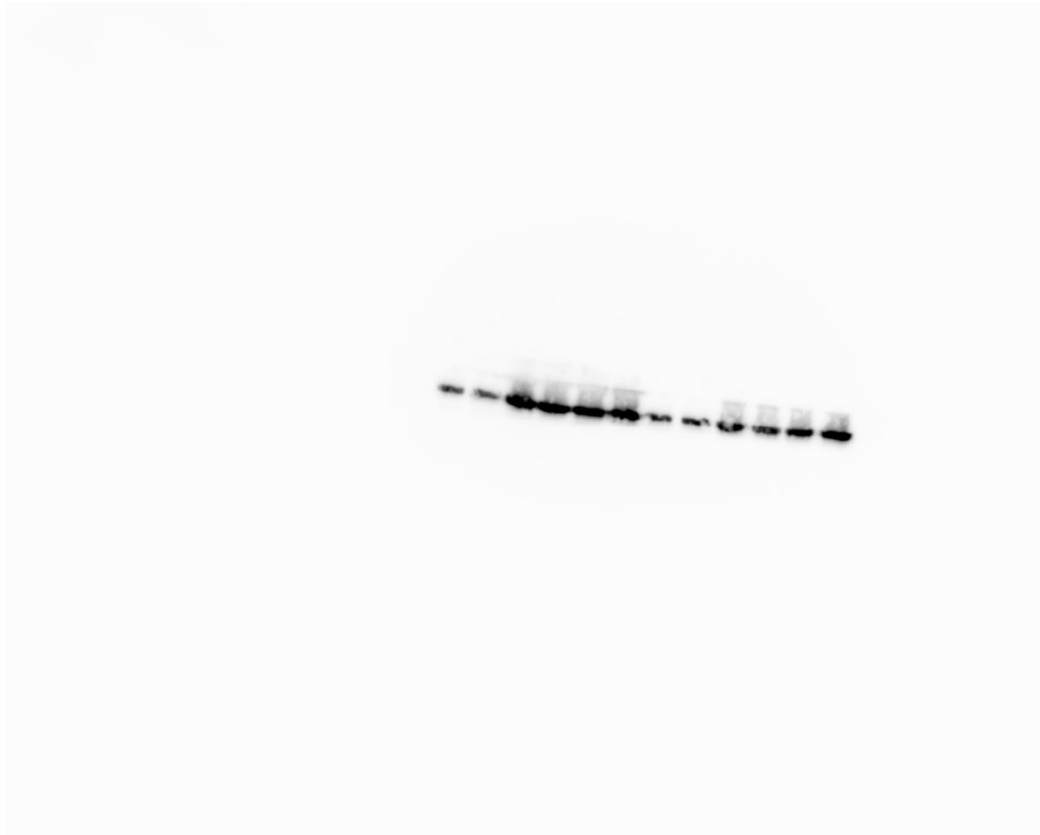

**p53**

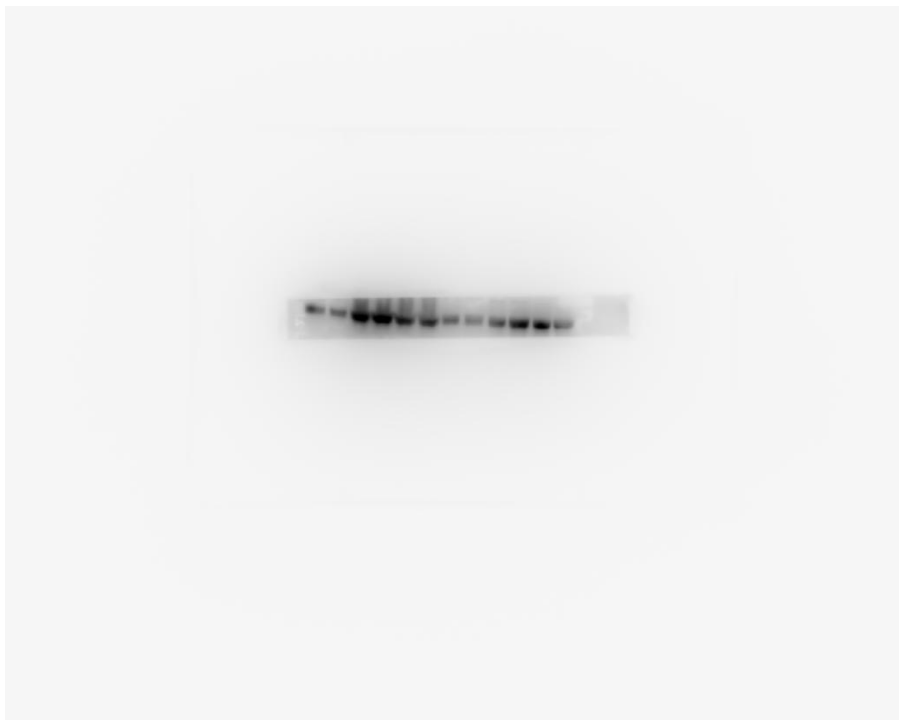

**P21**

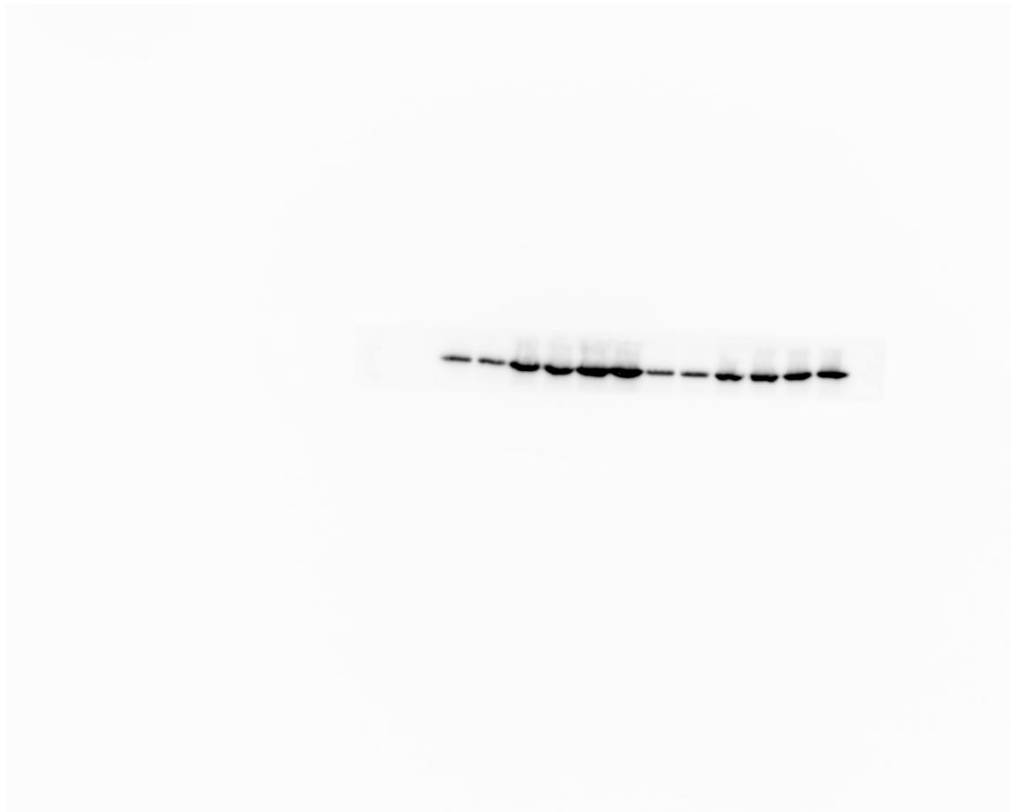

**P16**

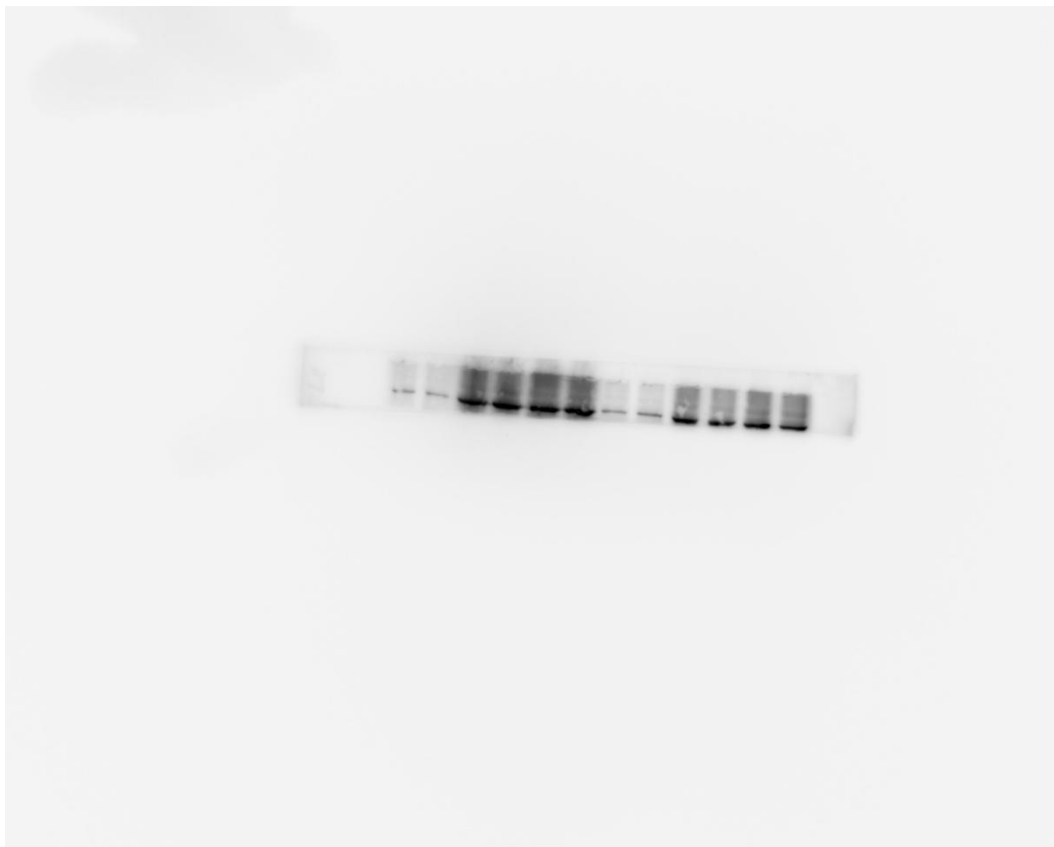

**GAPDH**

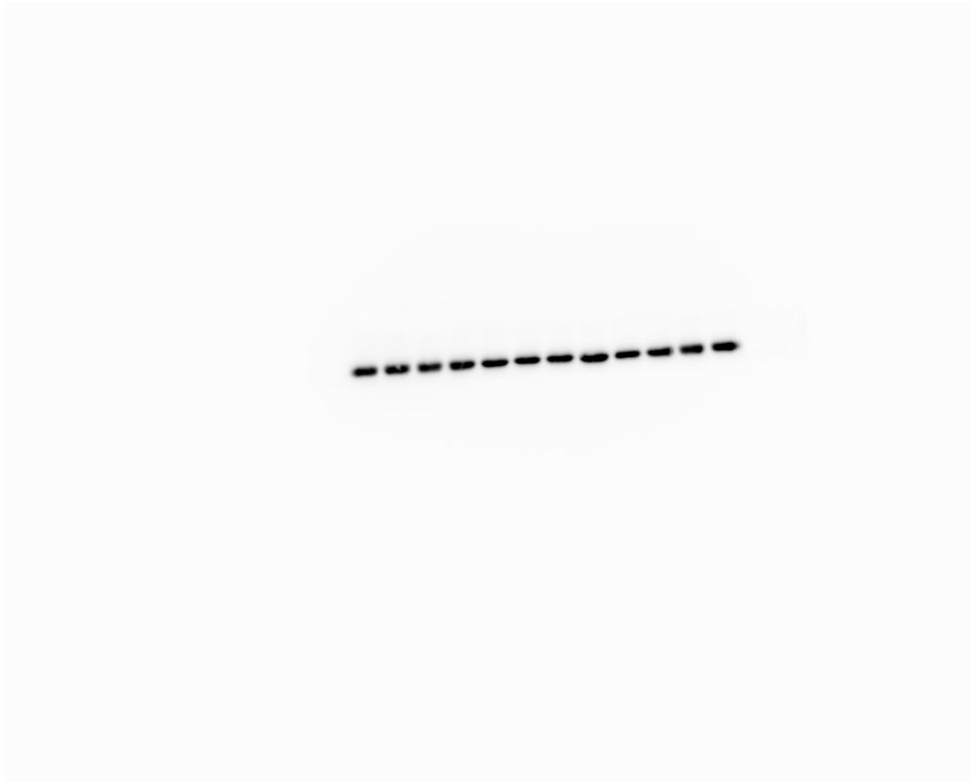

**Fig8D**

**Flag-IP**

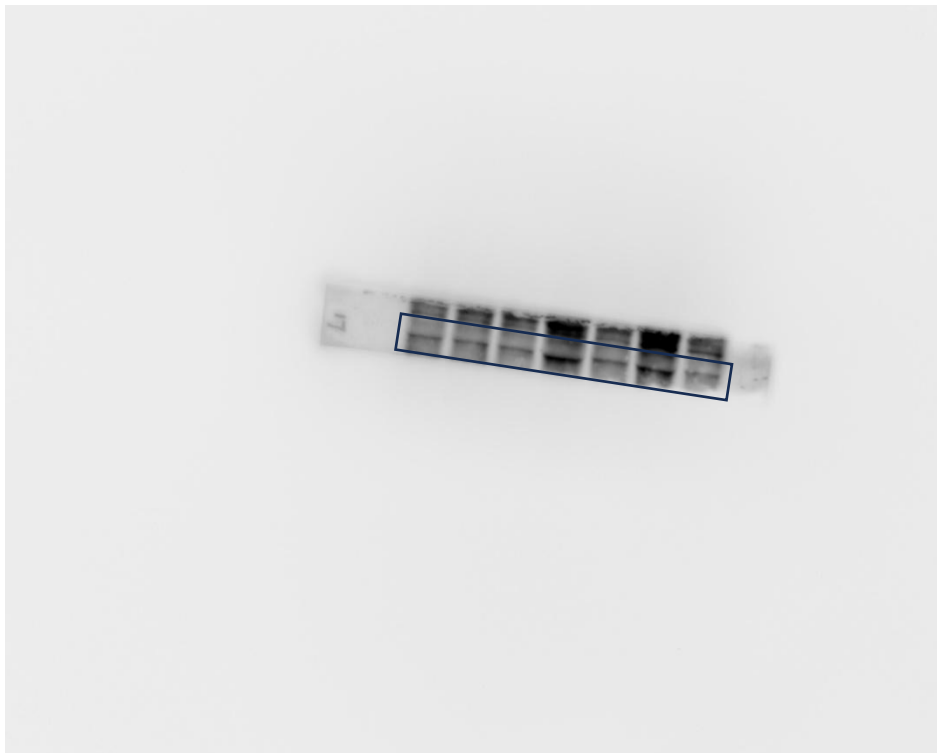

**GFP**

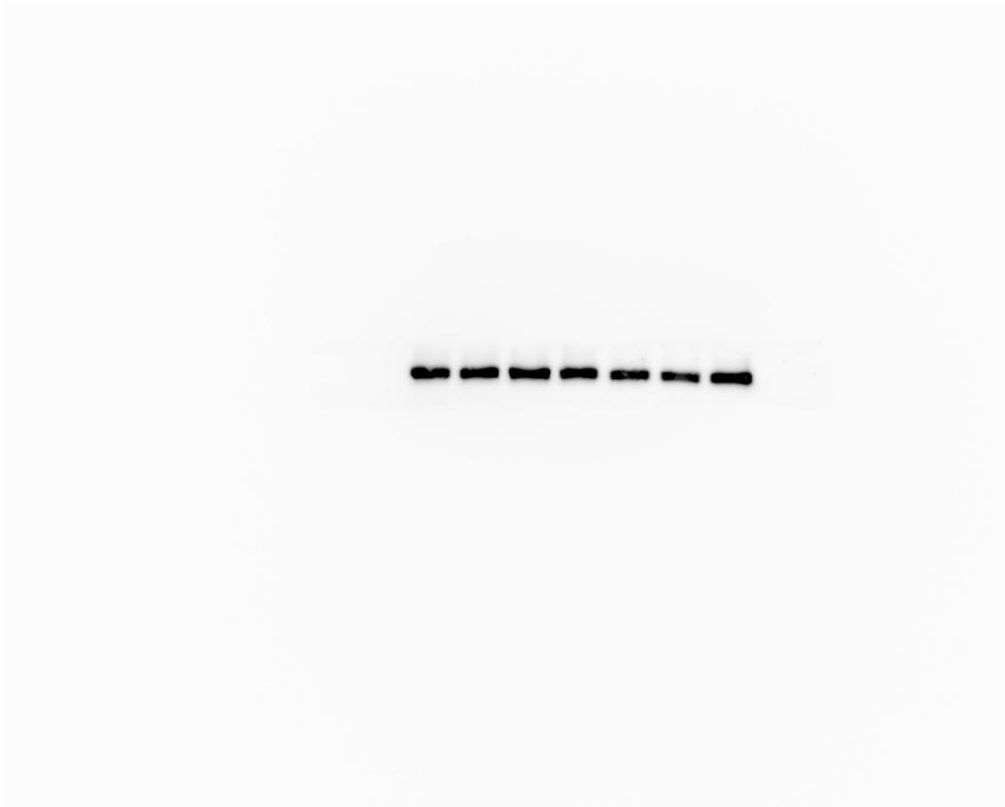

**Flag-Input**

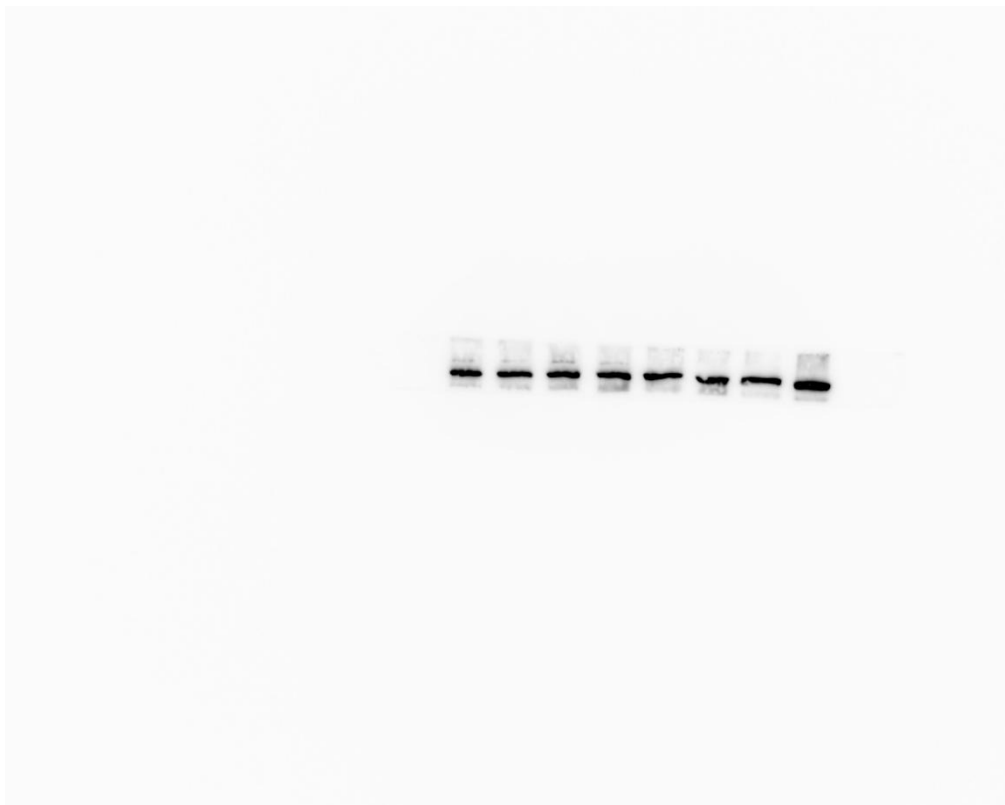

**GAPDH**

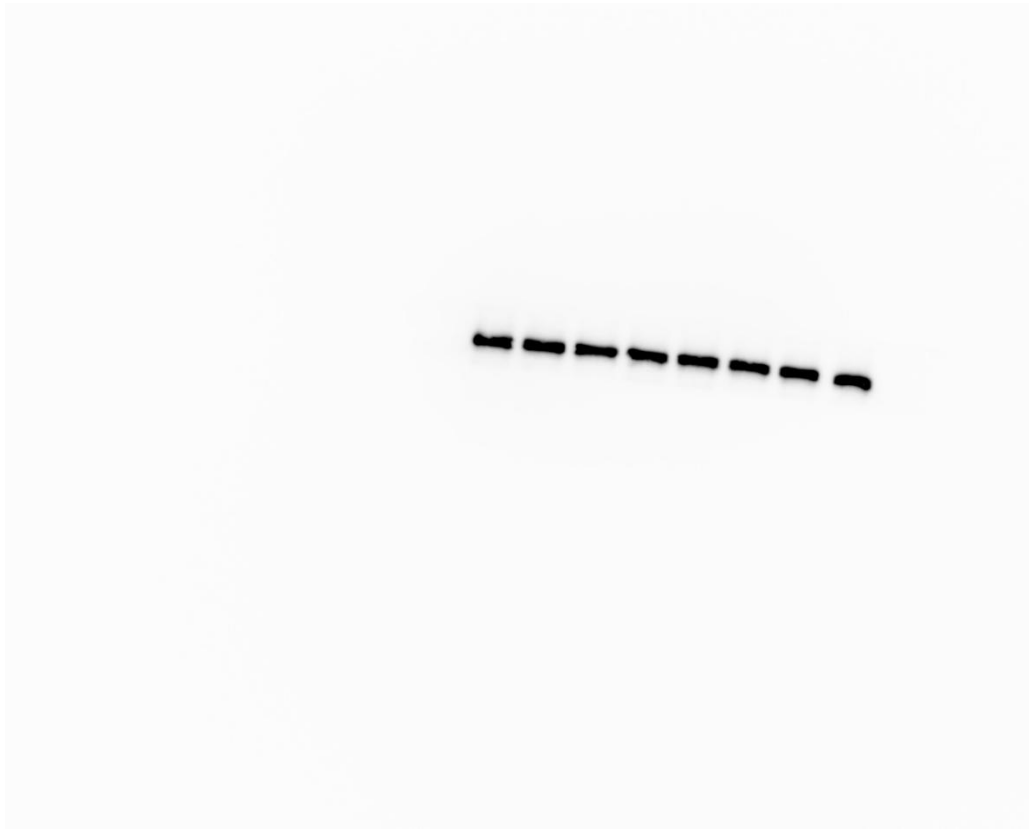

**Fig8E**

**WT-MED12**

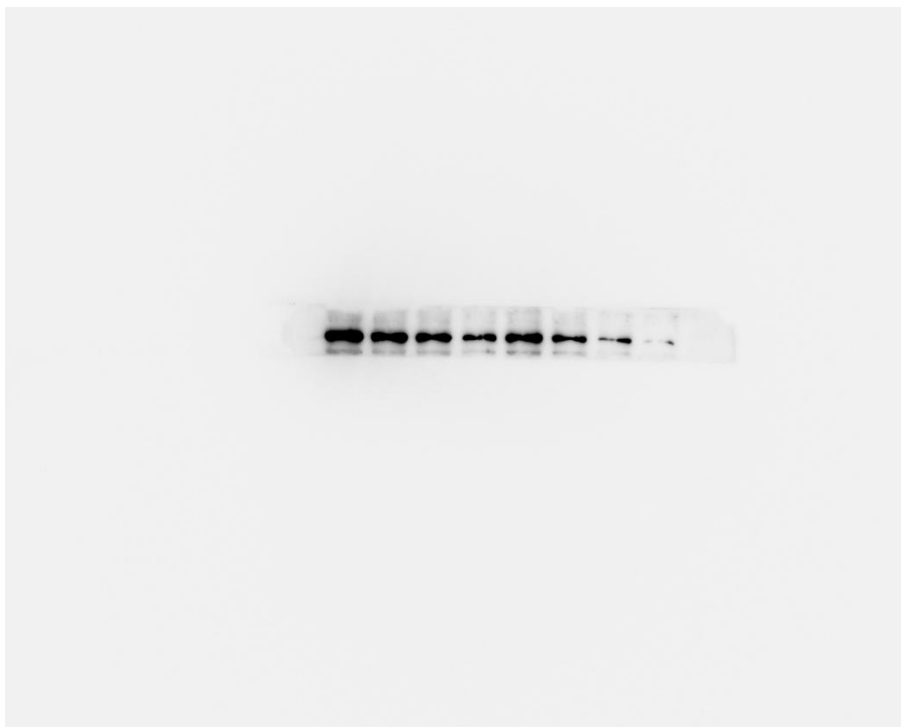

**WT-GAPDH**

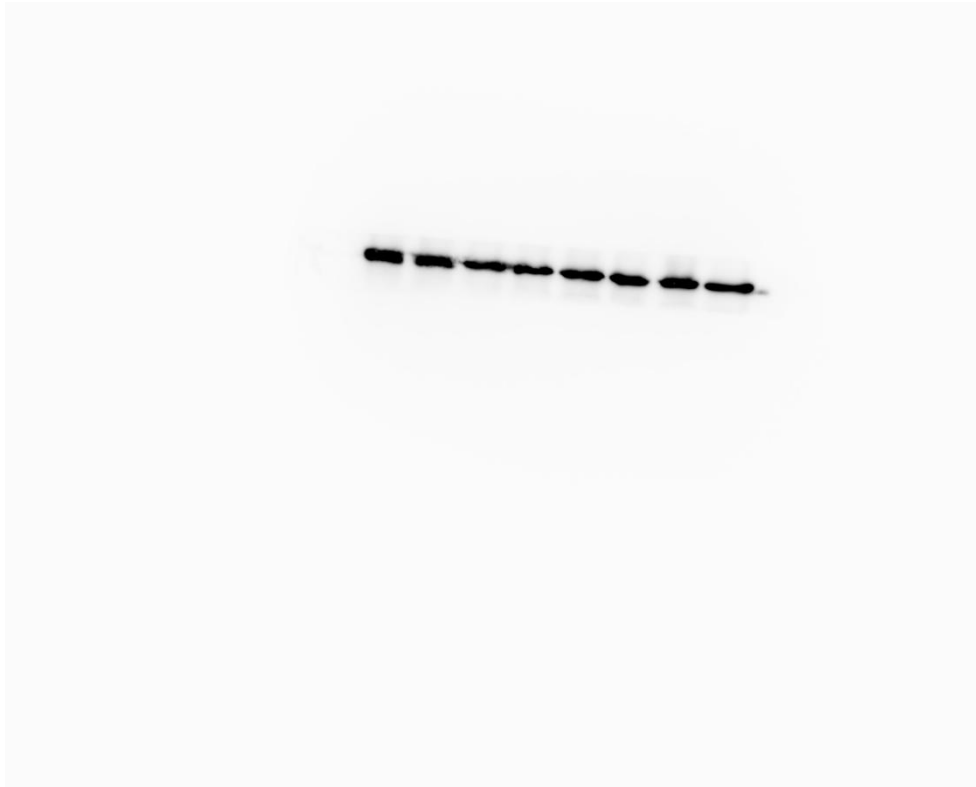

**RF-MED12**

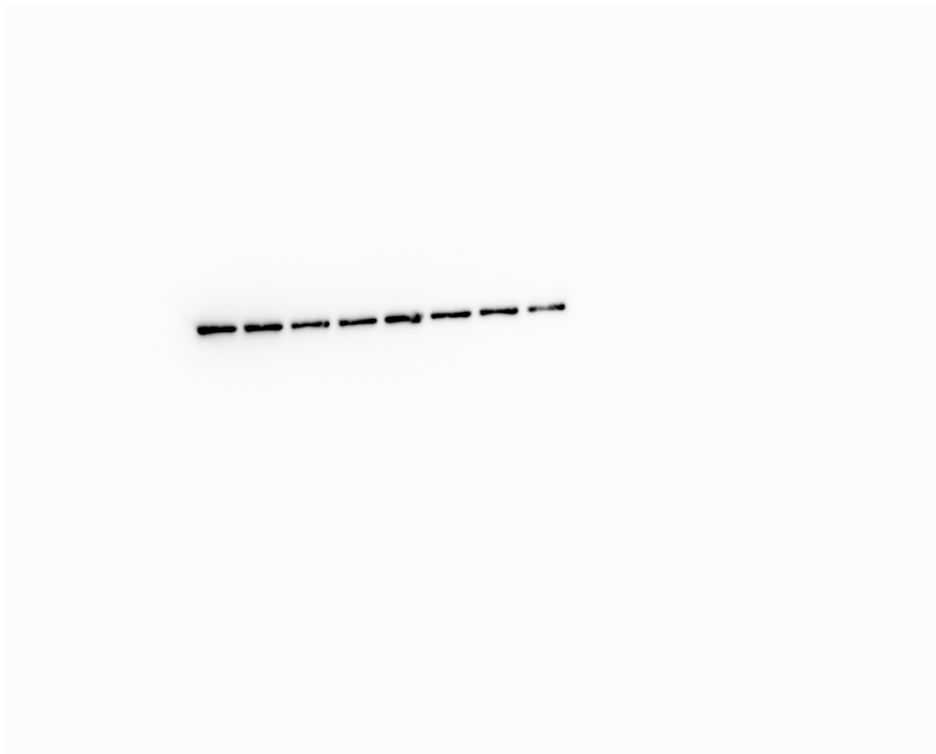

**RF-GAPDH**

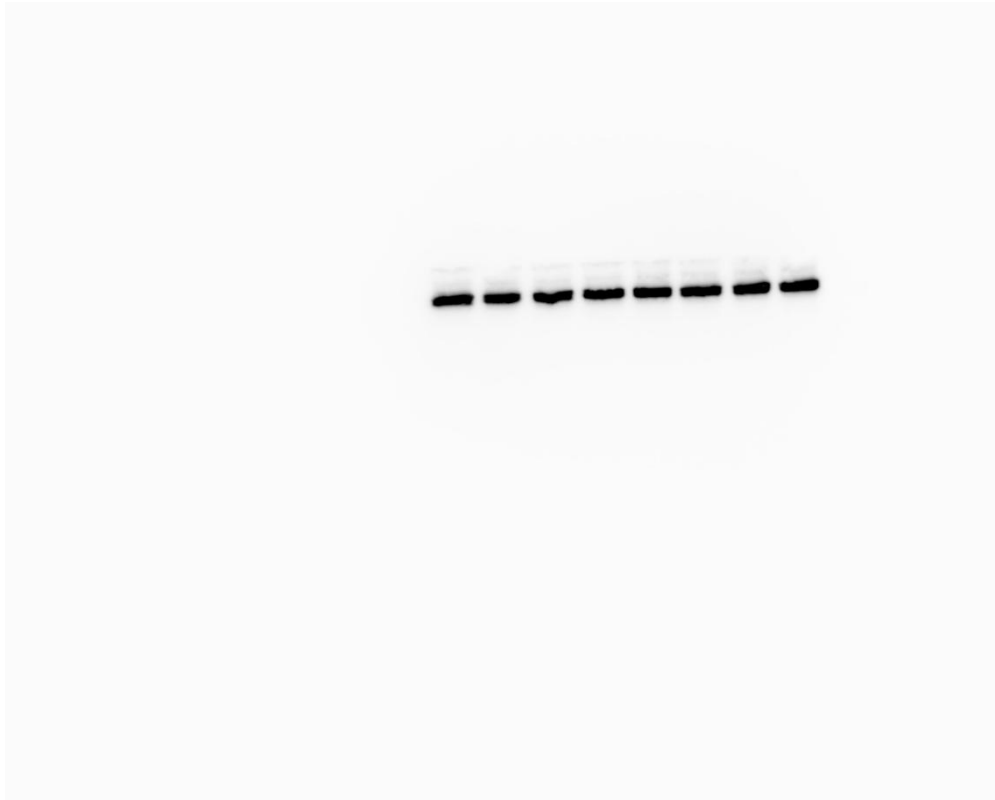

**Fig8G**

**MED12-IP**

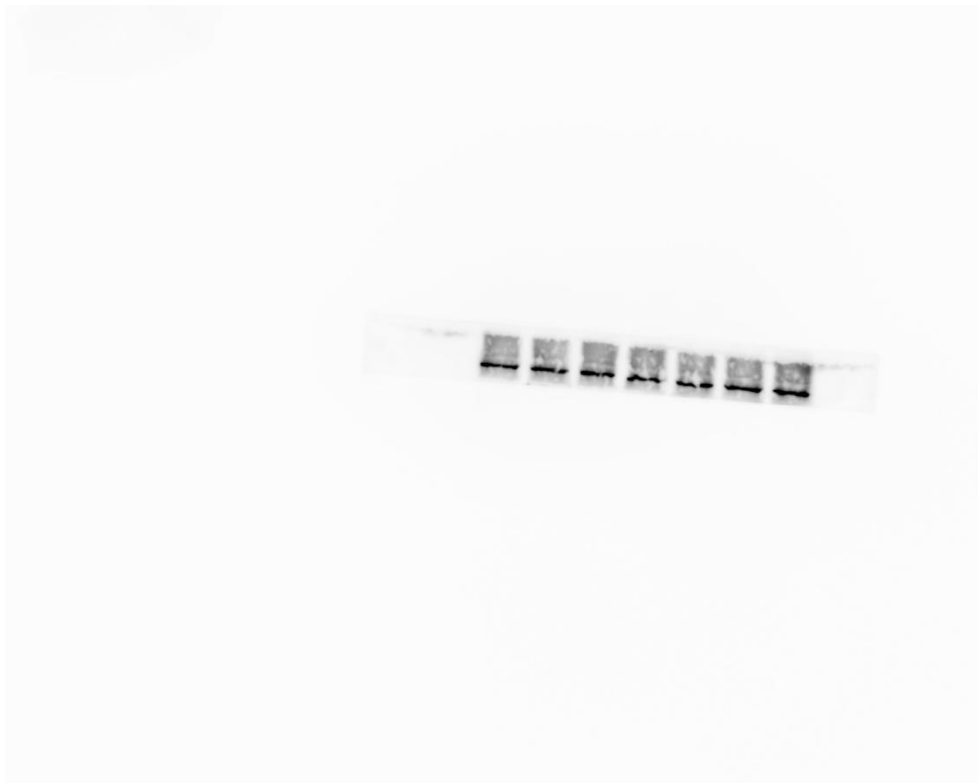

## Ub-IP

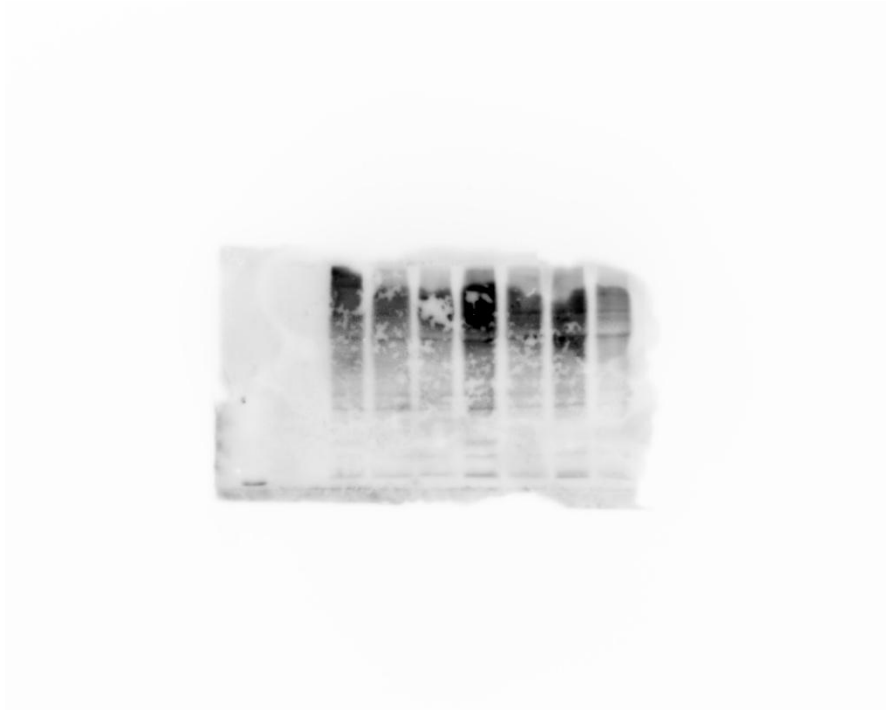

## MED12-Input

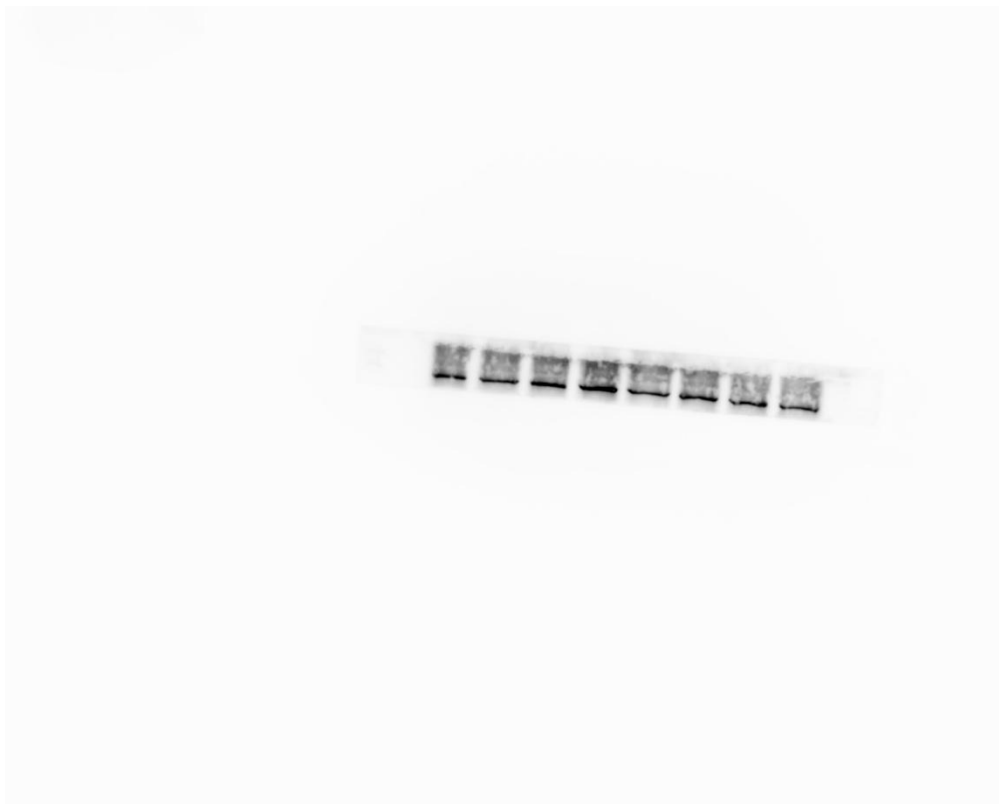

**GAPDH**

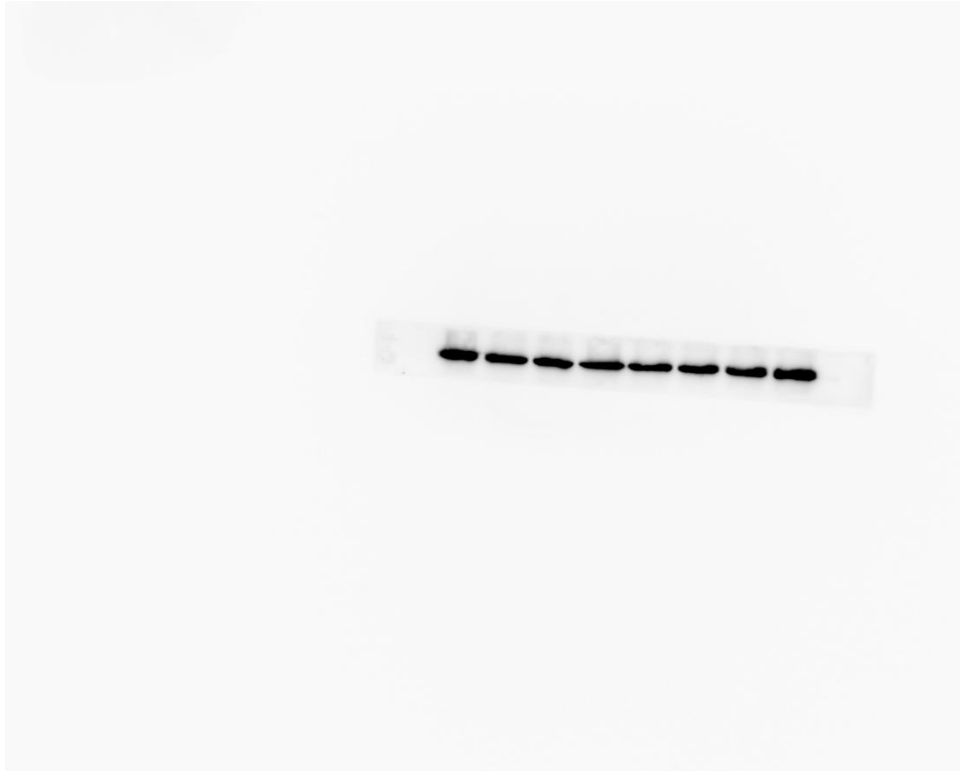

**Fig8H**

**PP53**

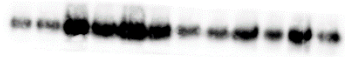

P53

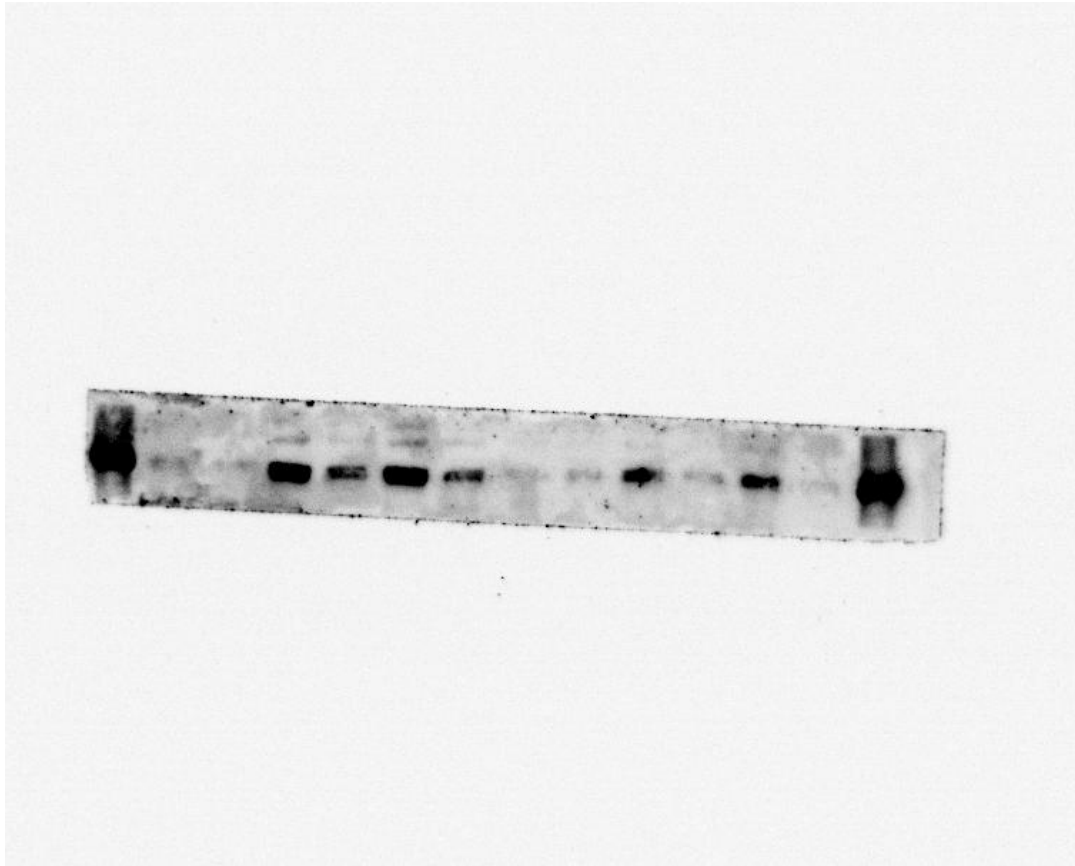

P21

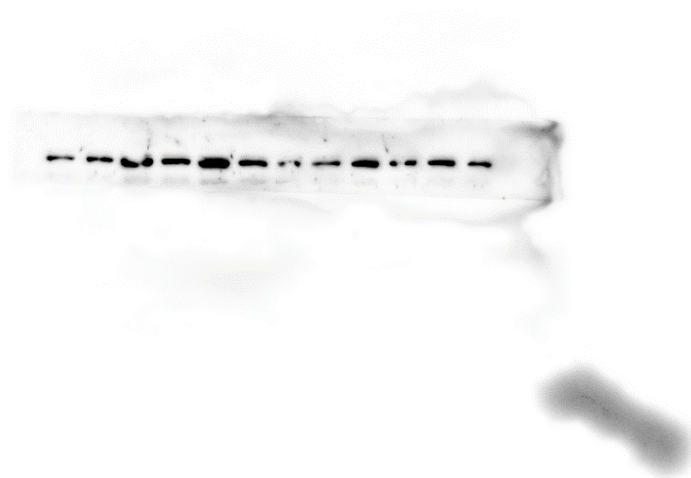

P16

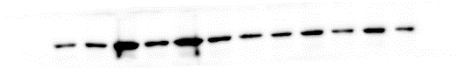

p-TBK1

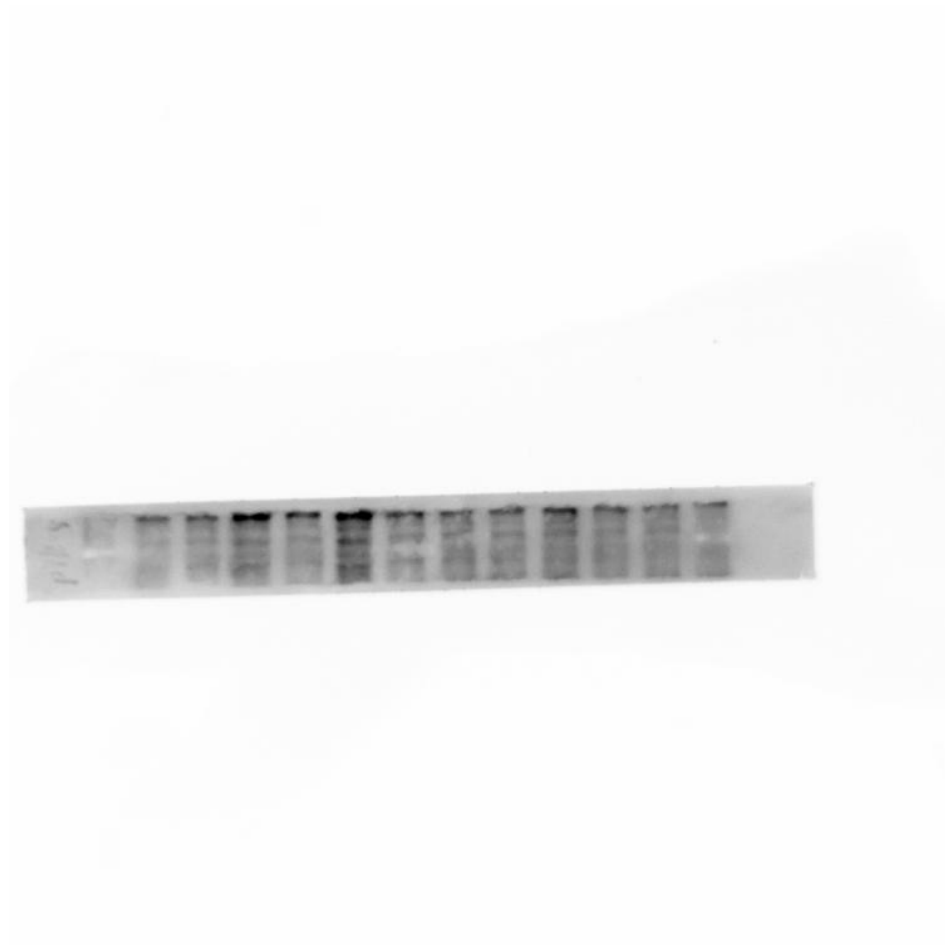

**TBK1**

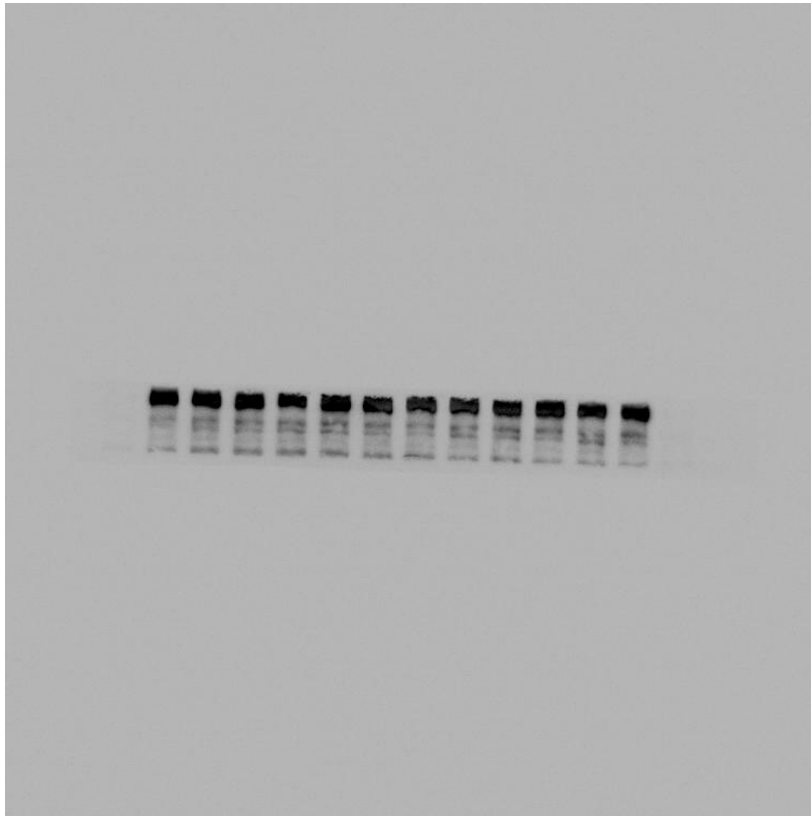

**p-IRF3**

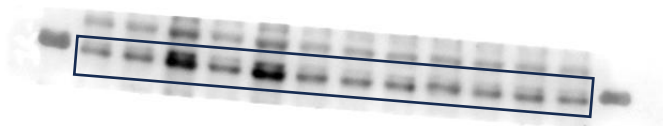

**IRF3**

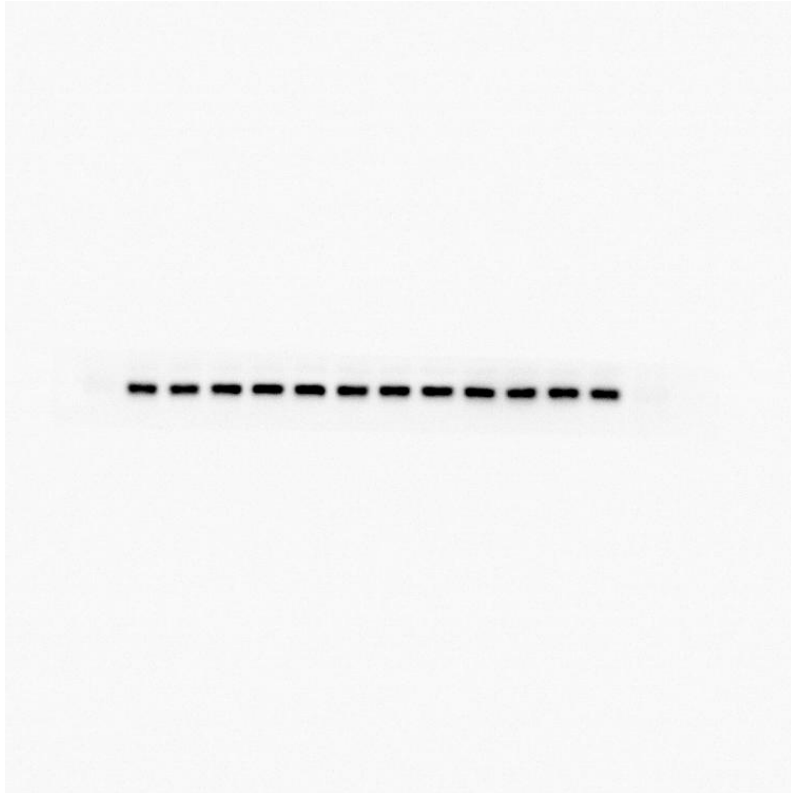

**STING**

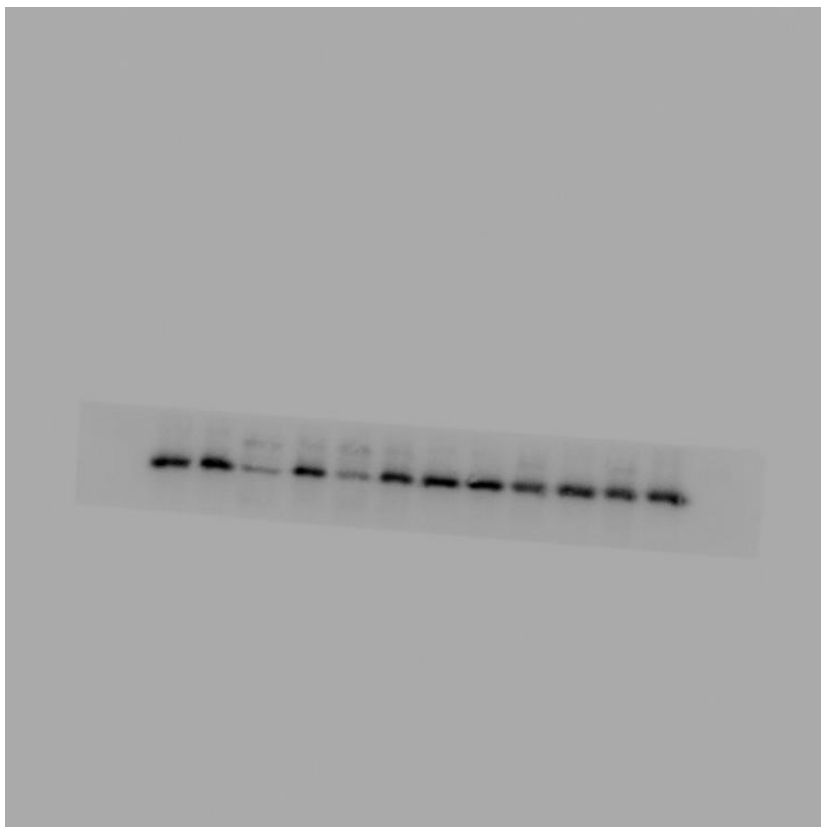

**GAPDH**

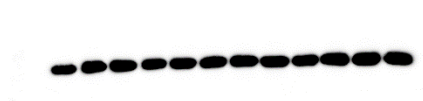

**Fig9B**

**TSG101**

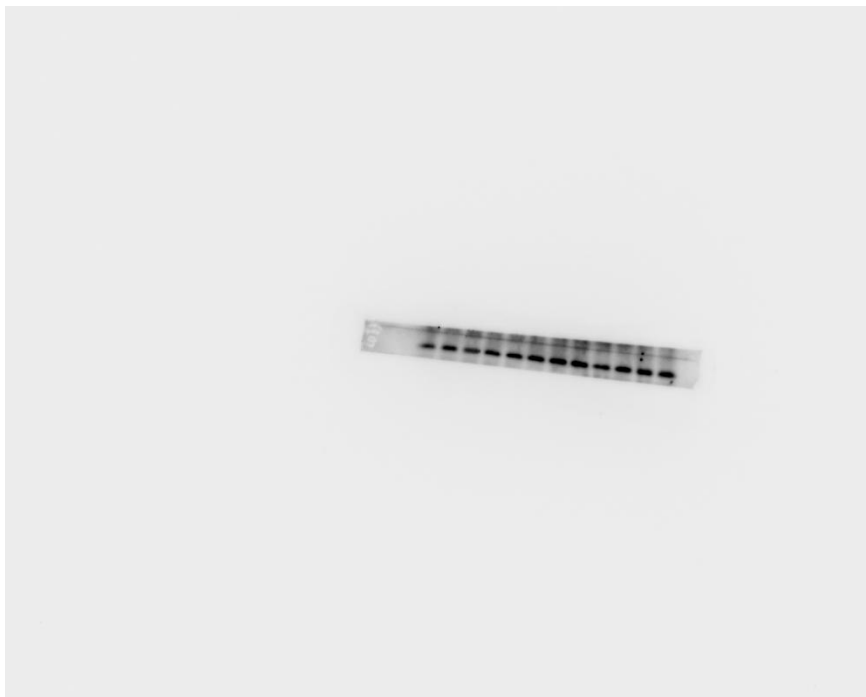

**CD63**

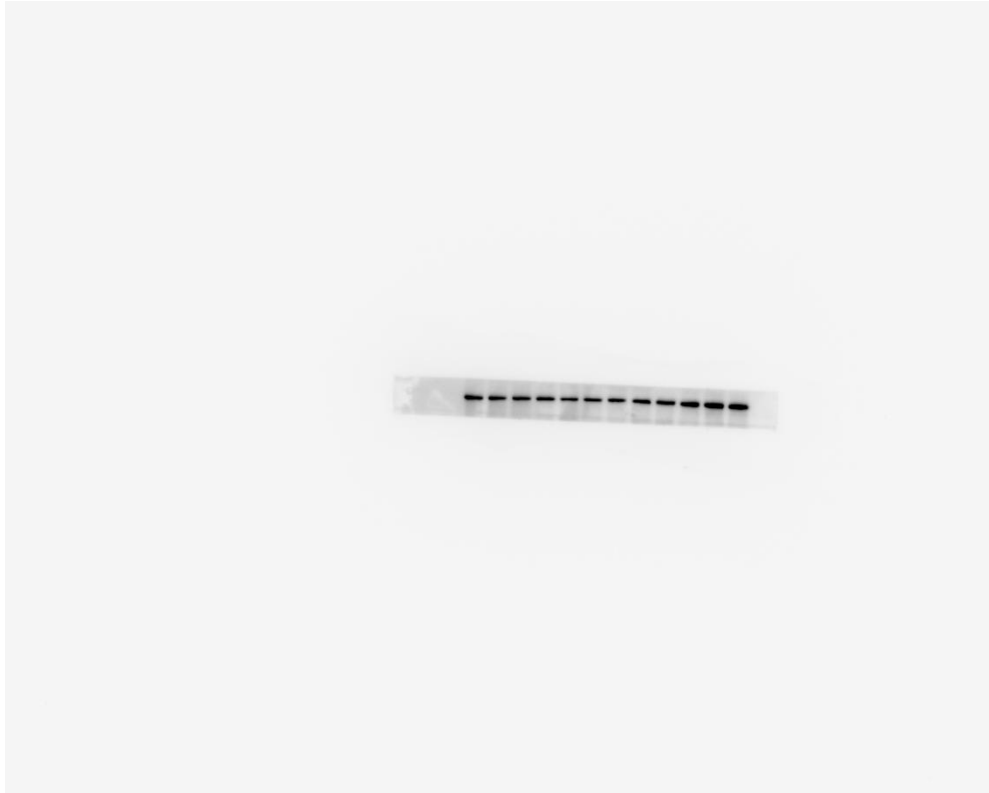

**CD9**

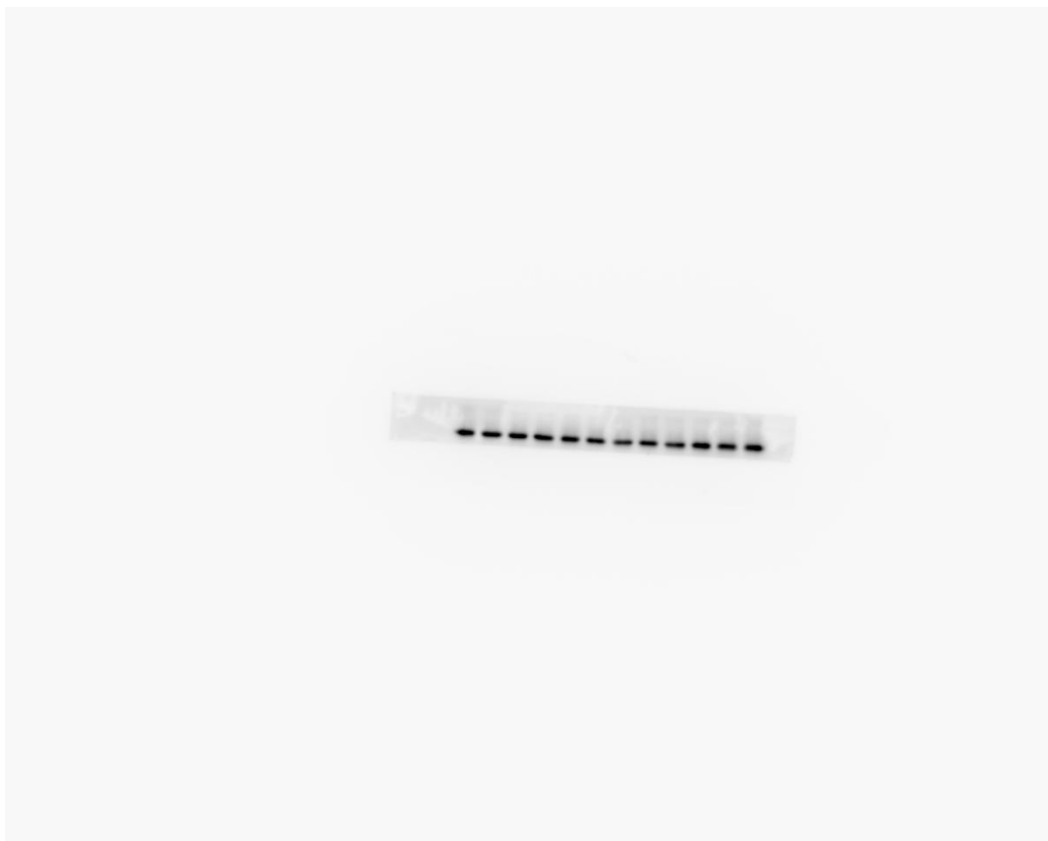

**GAPDH**

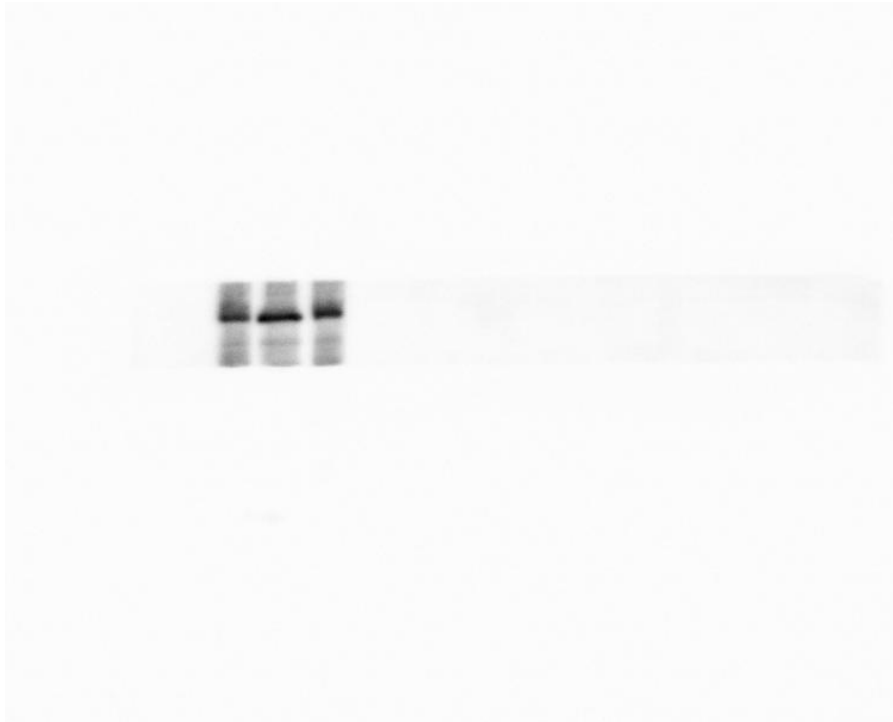

**Fig9E**

**MED12**

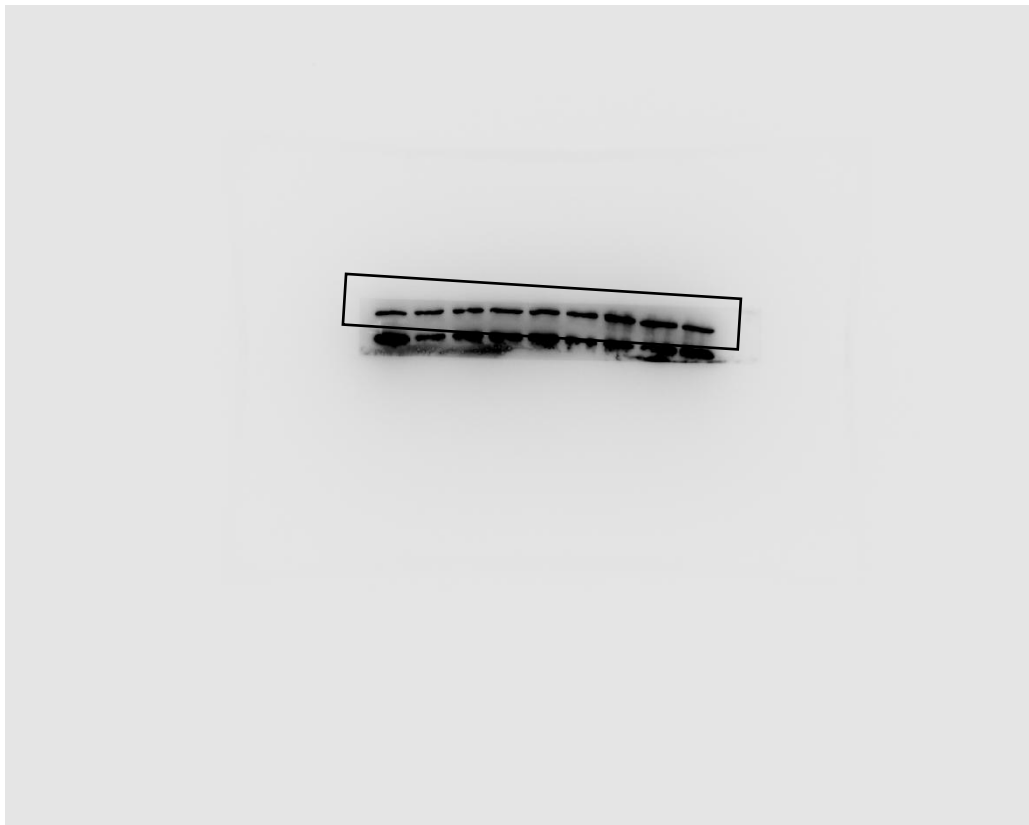

**GAPDH**

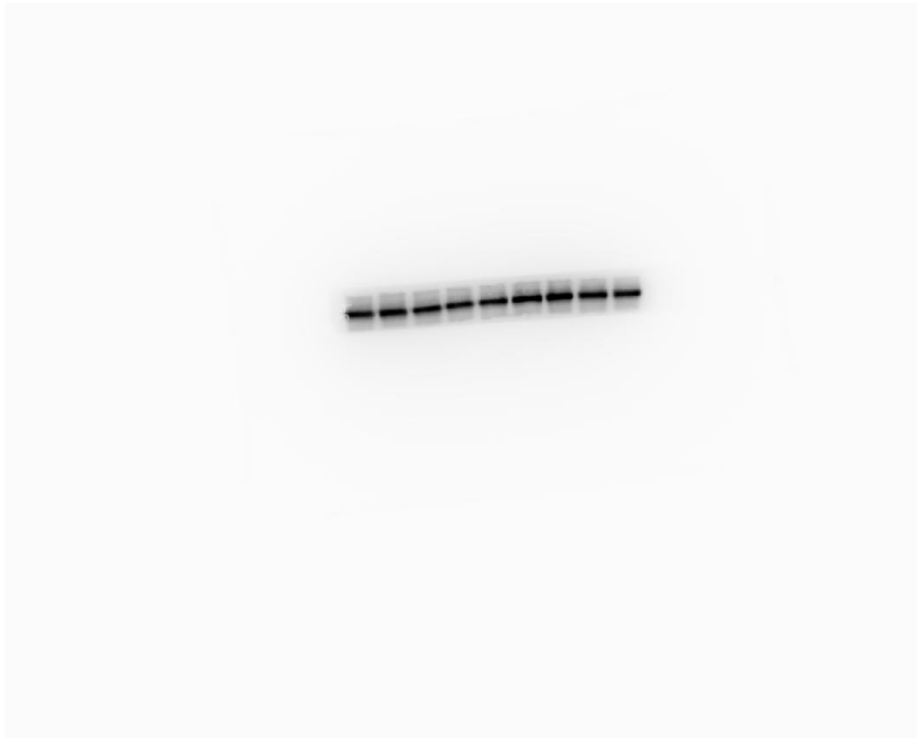

**Fig9F**

**PP53**

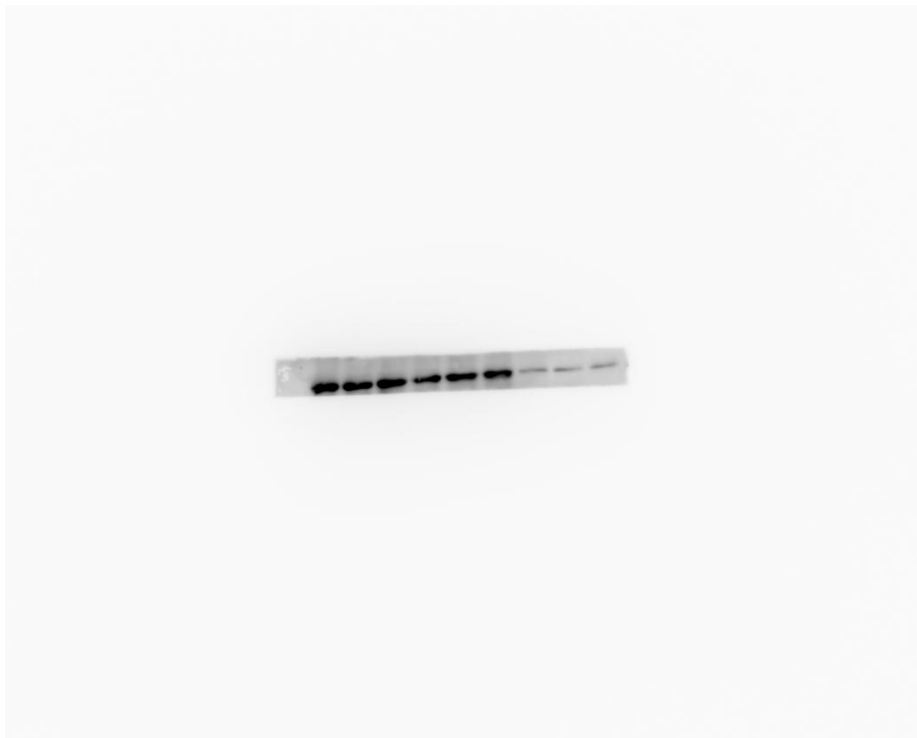

P53

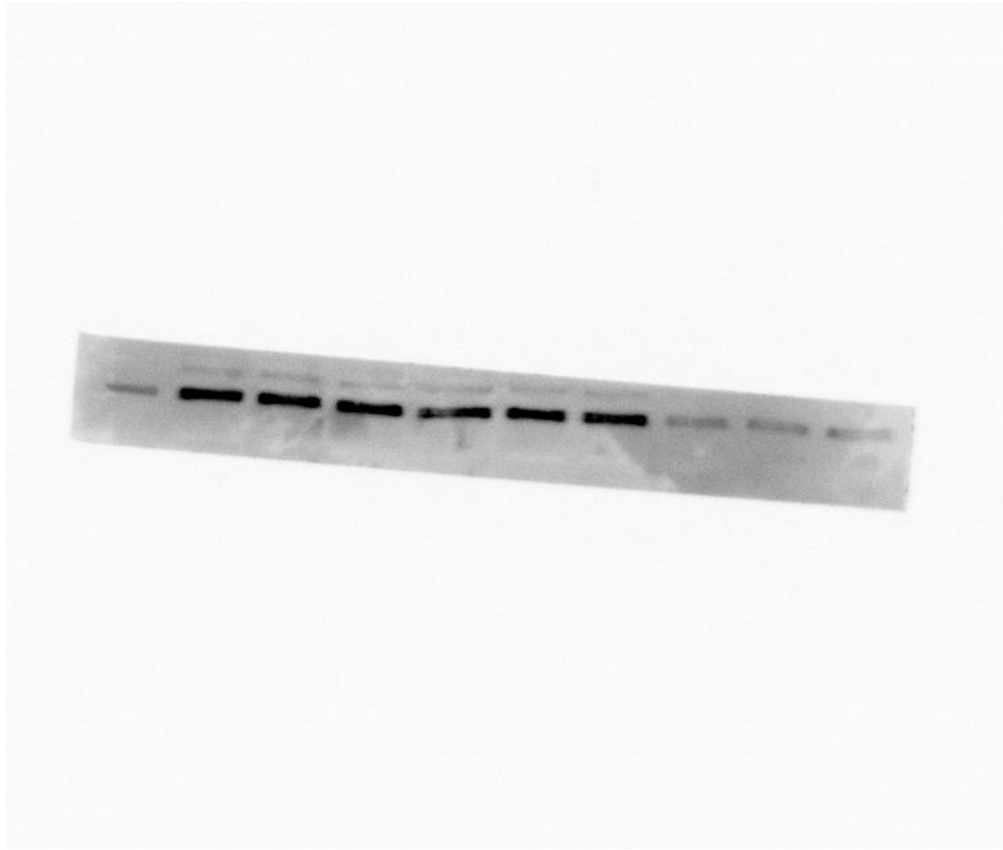

P21

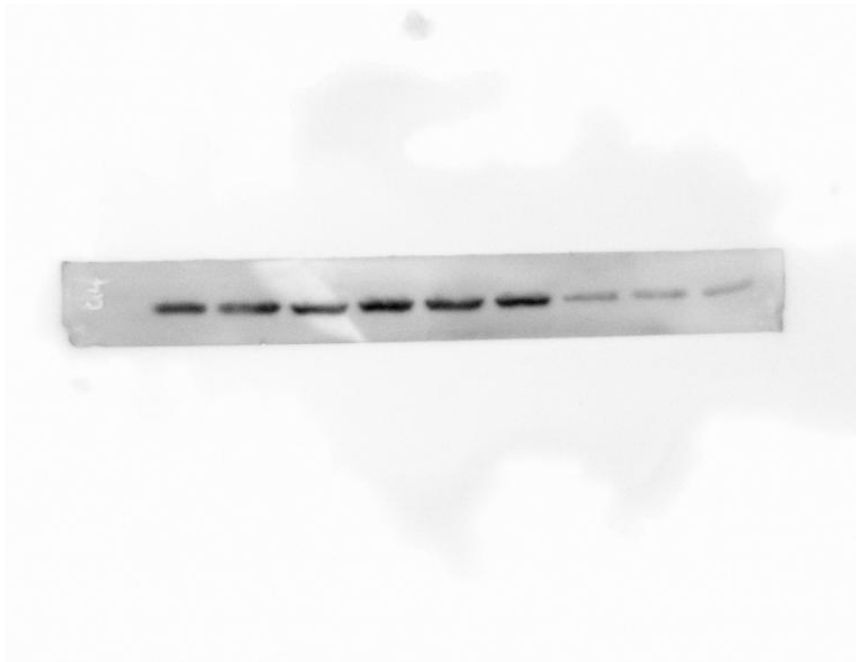

**P16**

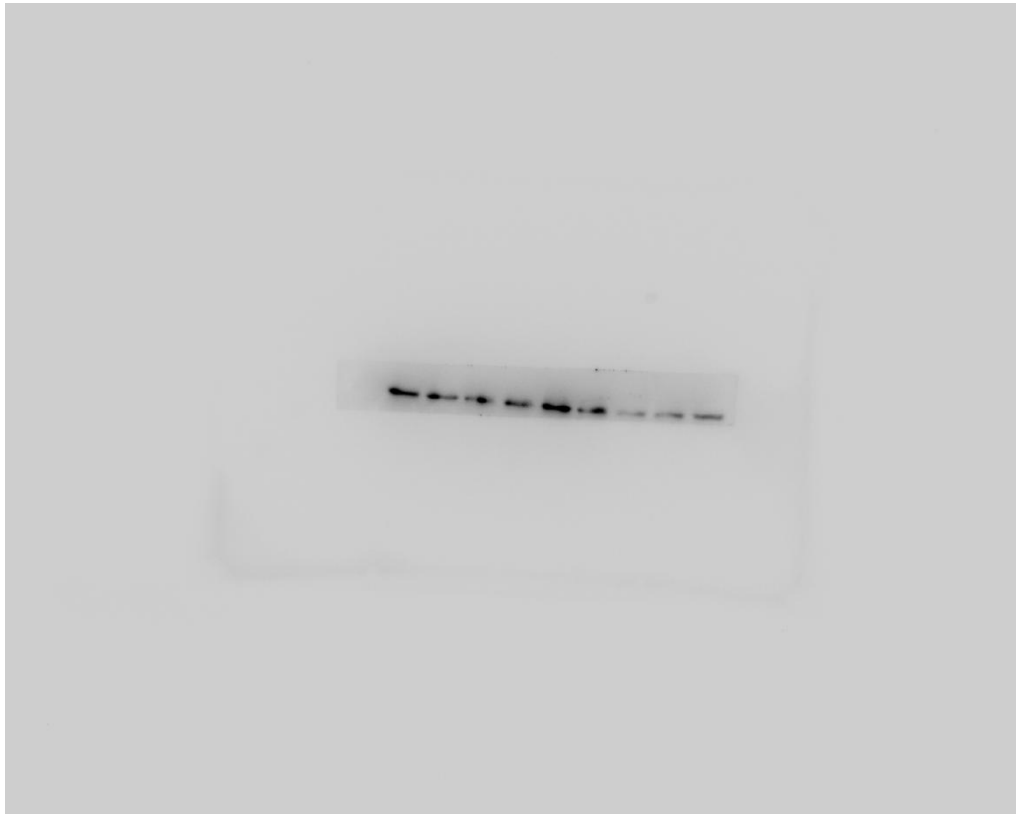

**GAPDH**

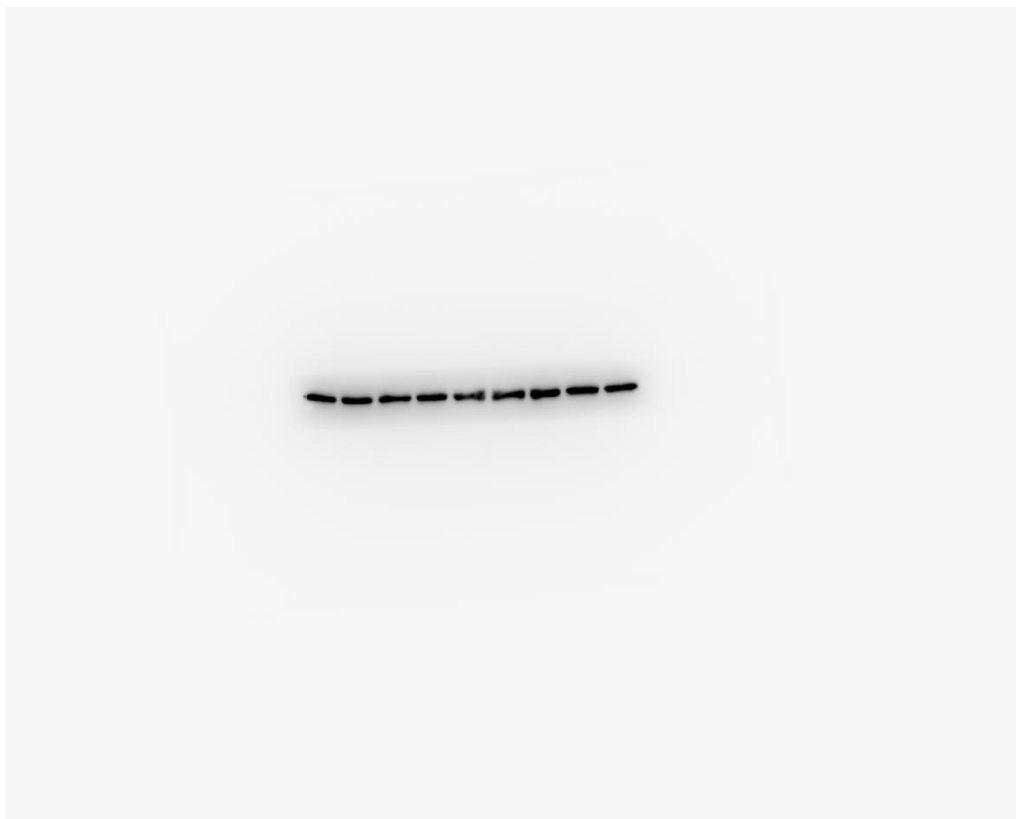

**Fig9G**

**p-TBK1**

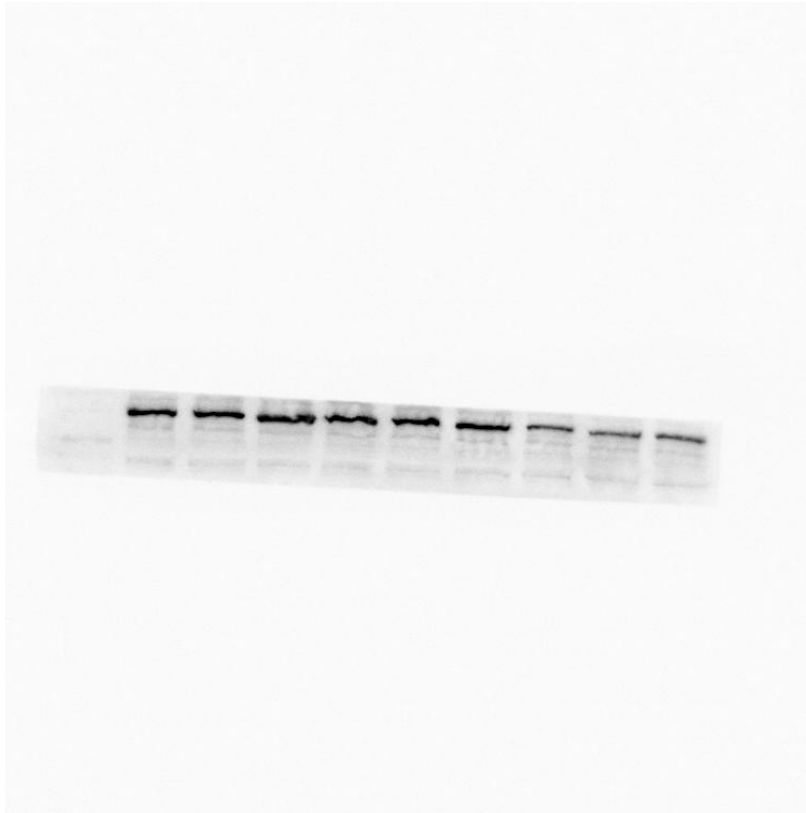

**TBK1**

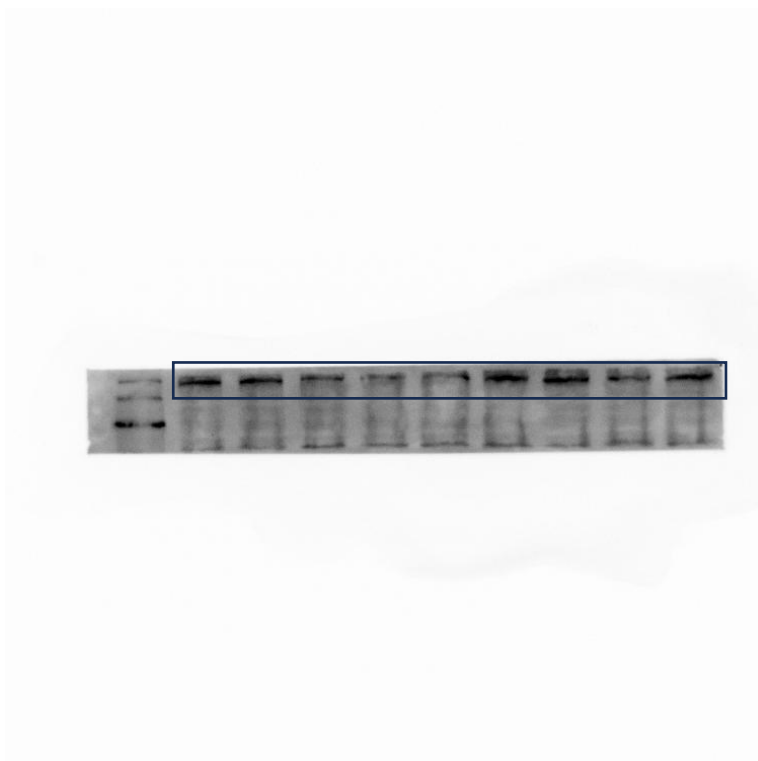

**p-IRF3**

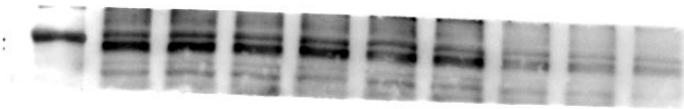

**IRF3**

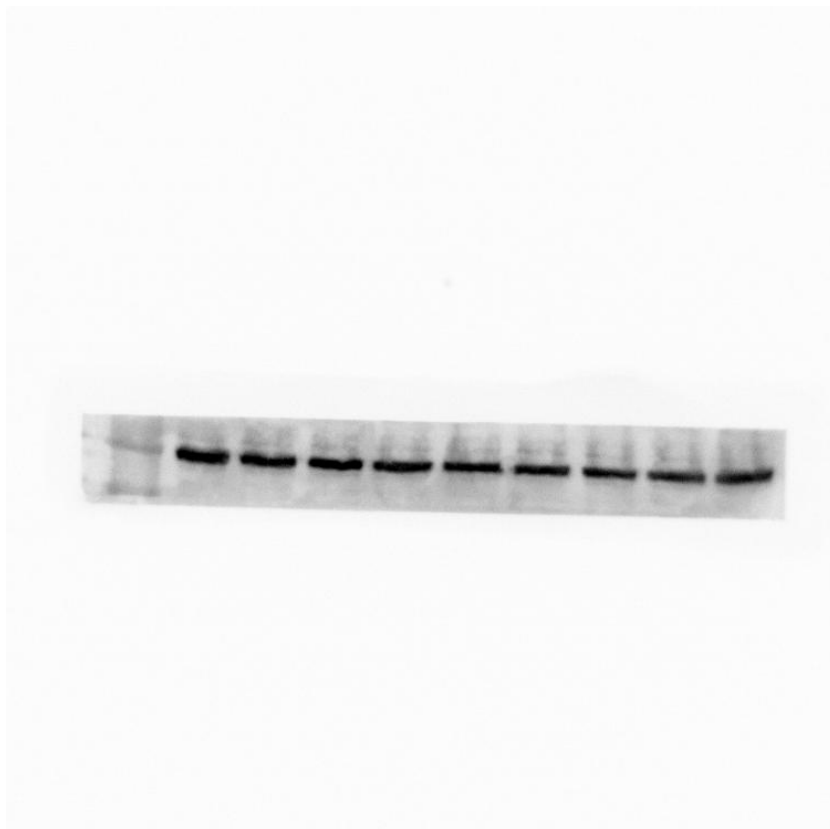

**STING**

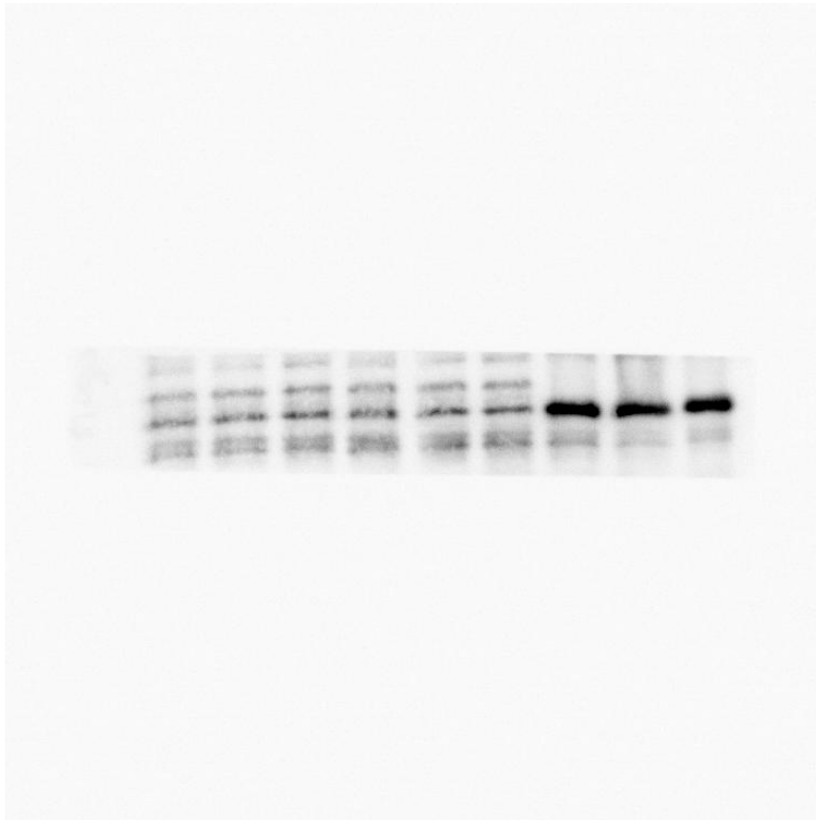

**GAPDH**

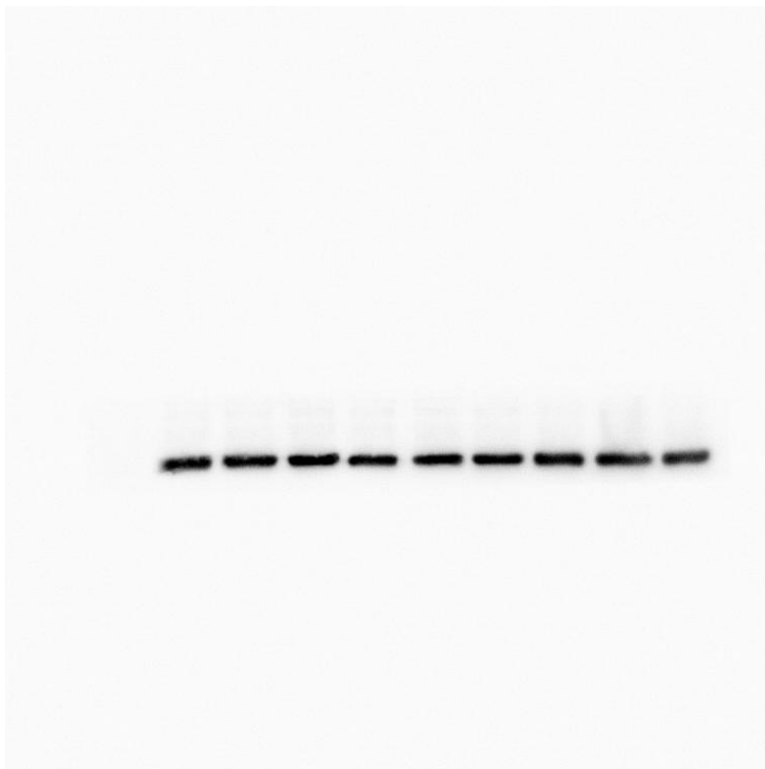

**FigS1B**

**MMA-IP**

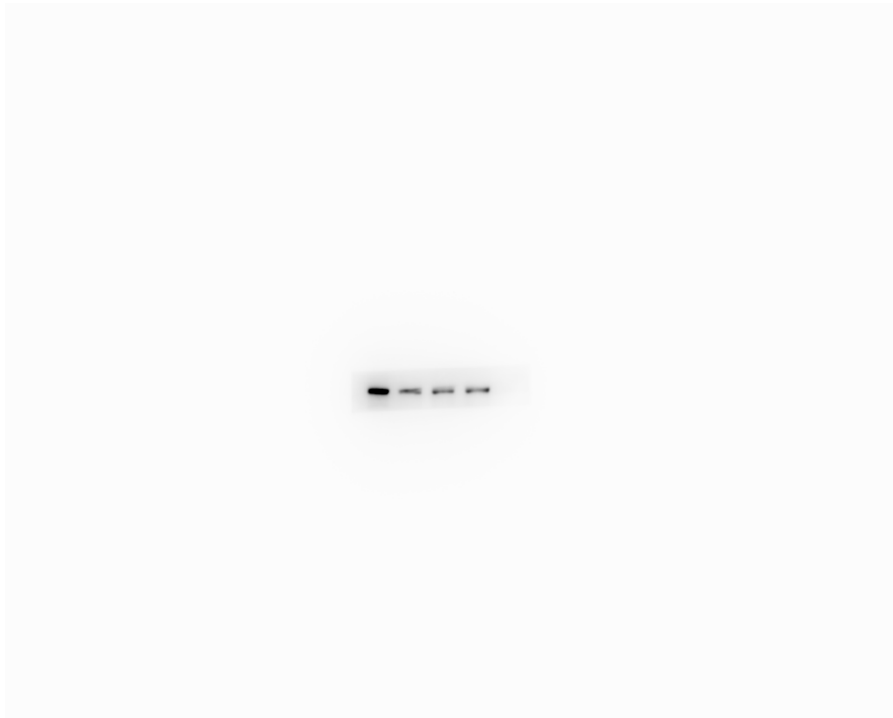

**GFP-IP**

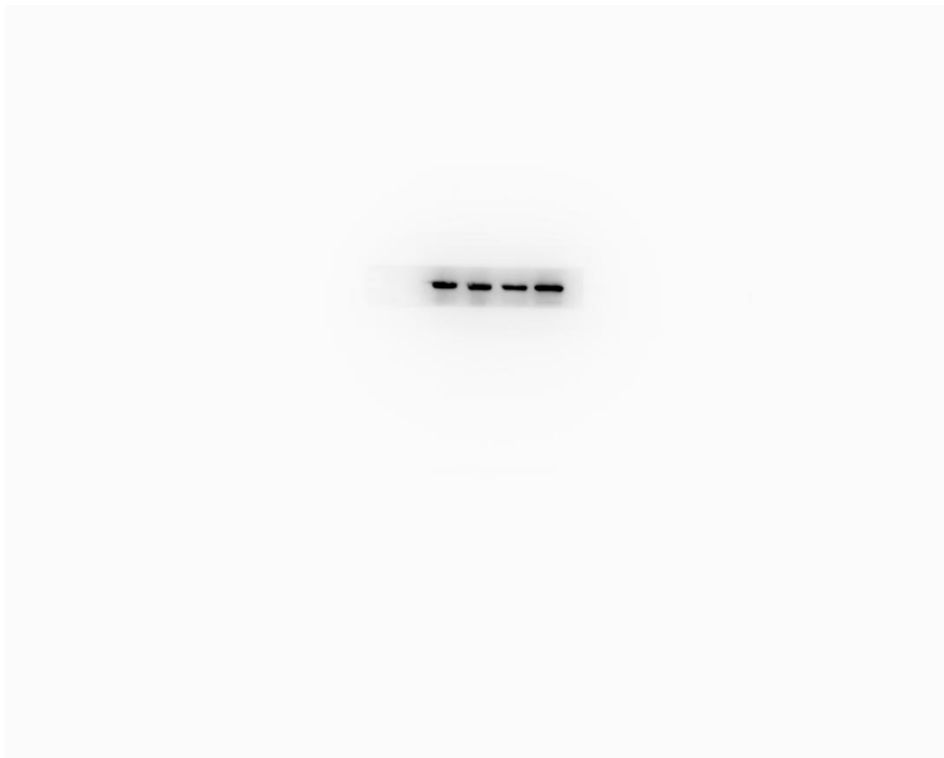

**GFP-Input**

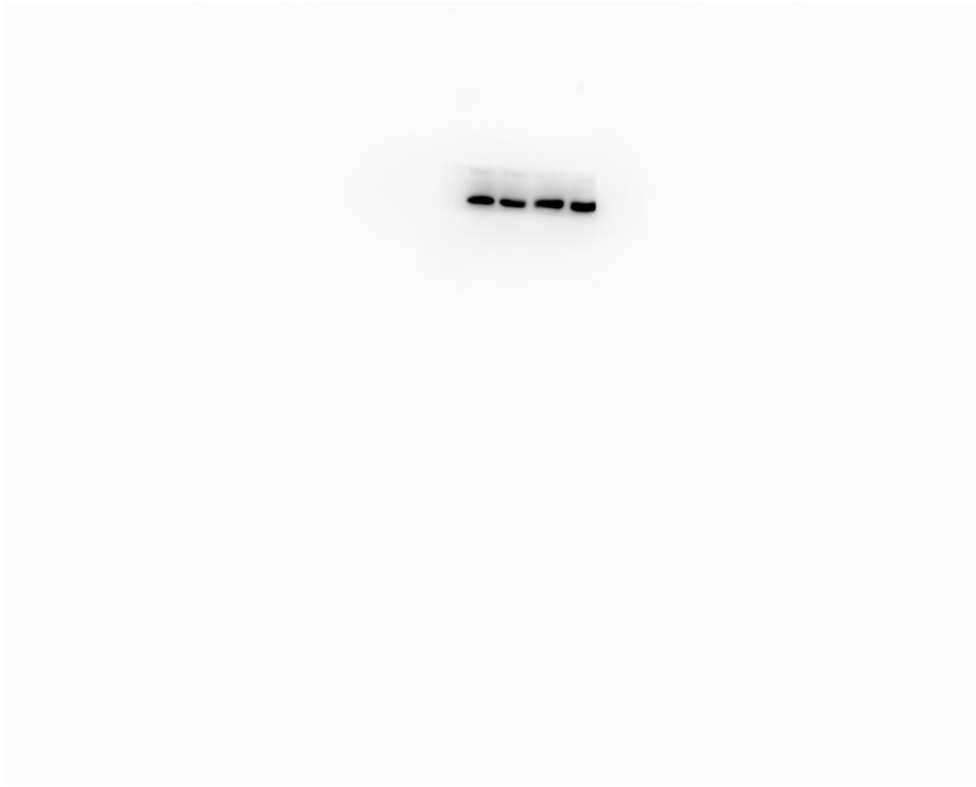

**ACTIN**

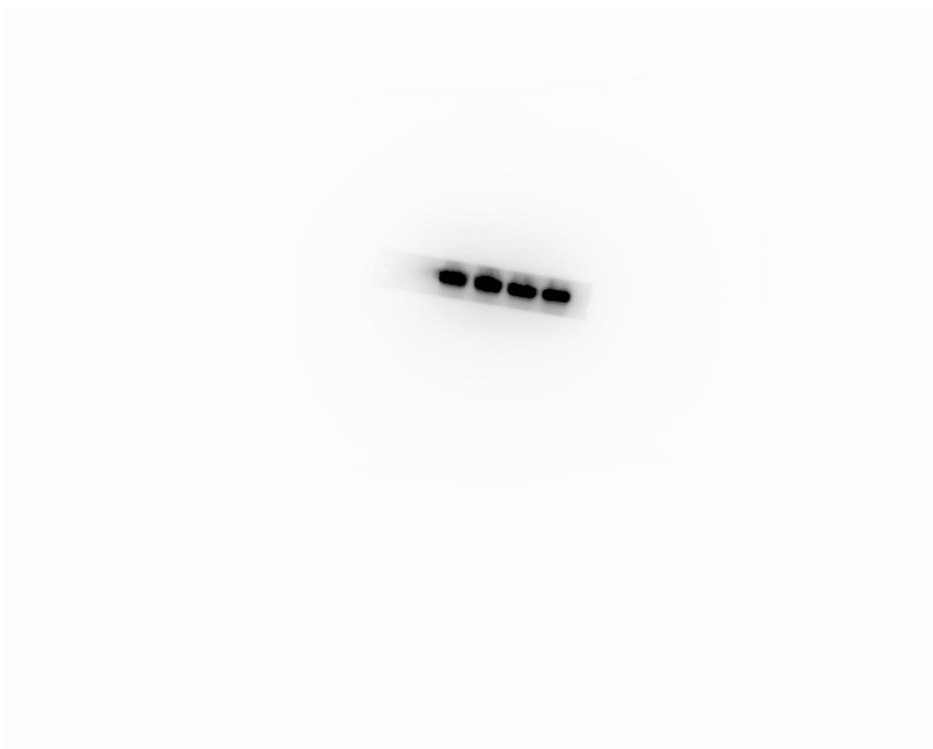

**FigS1D**

**Human**

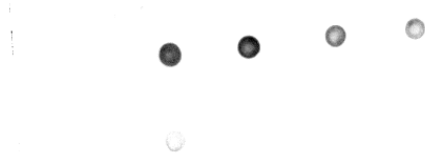

**Rat**

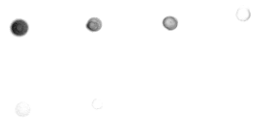

**FigS1E**

**FBXO7me**

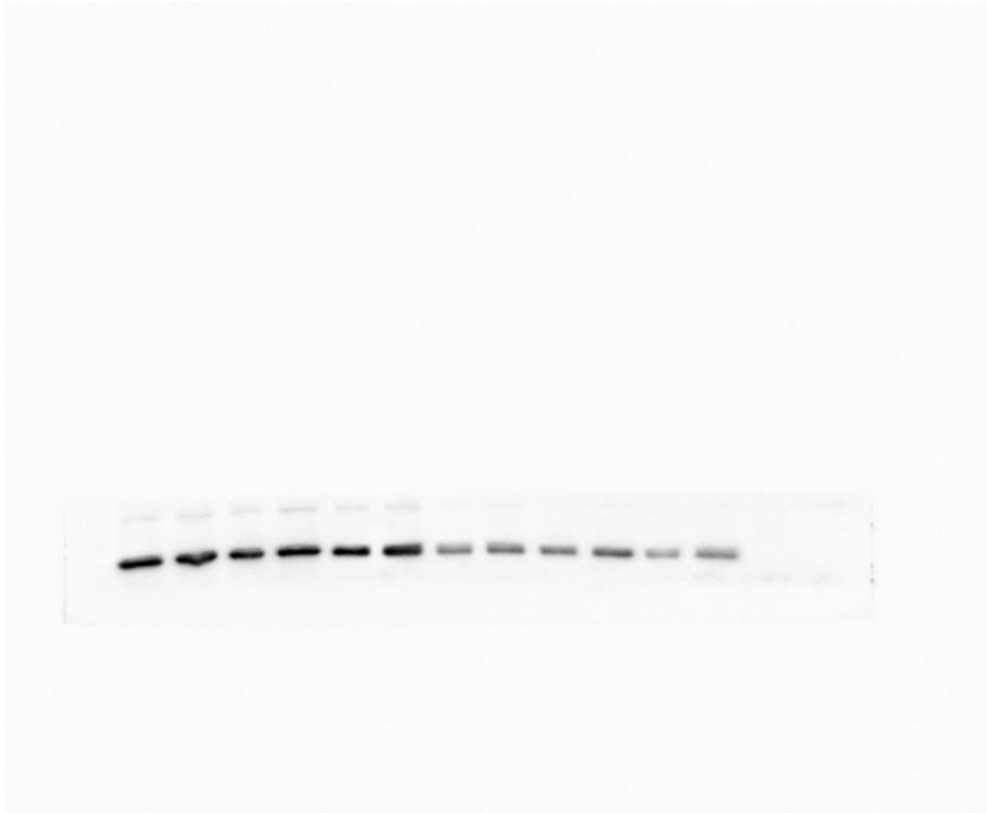

**GAPDH**

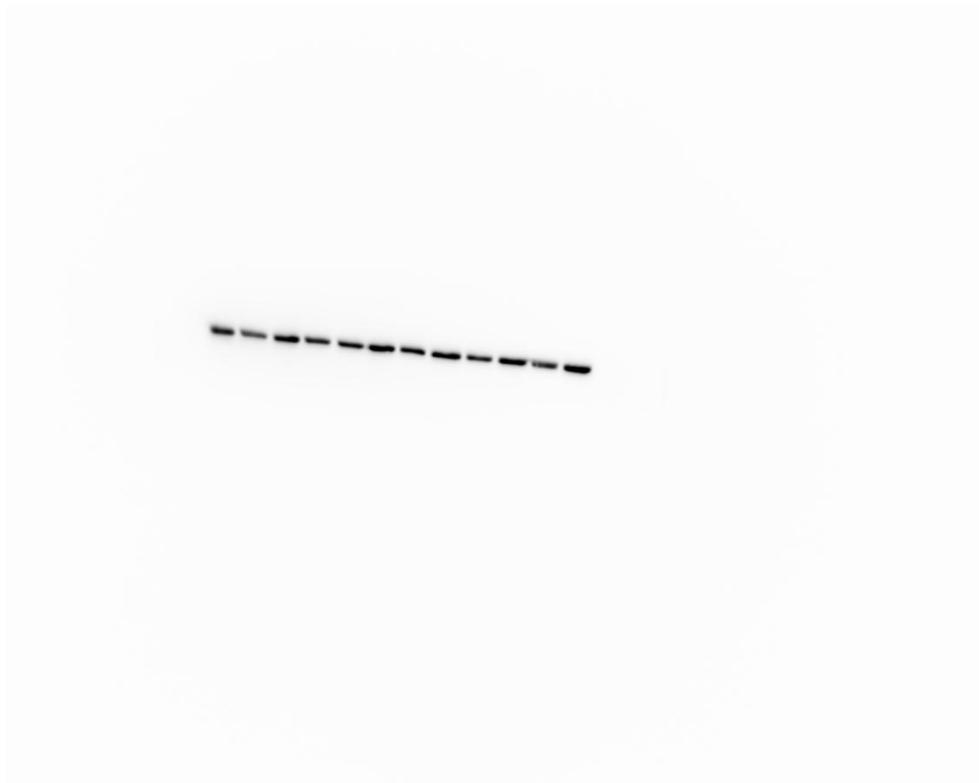

**FigS2A**

**P53**

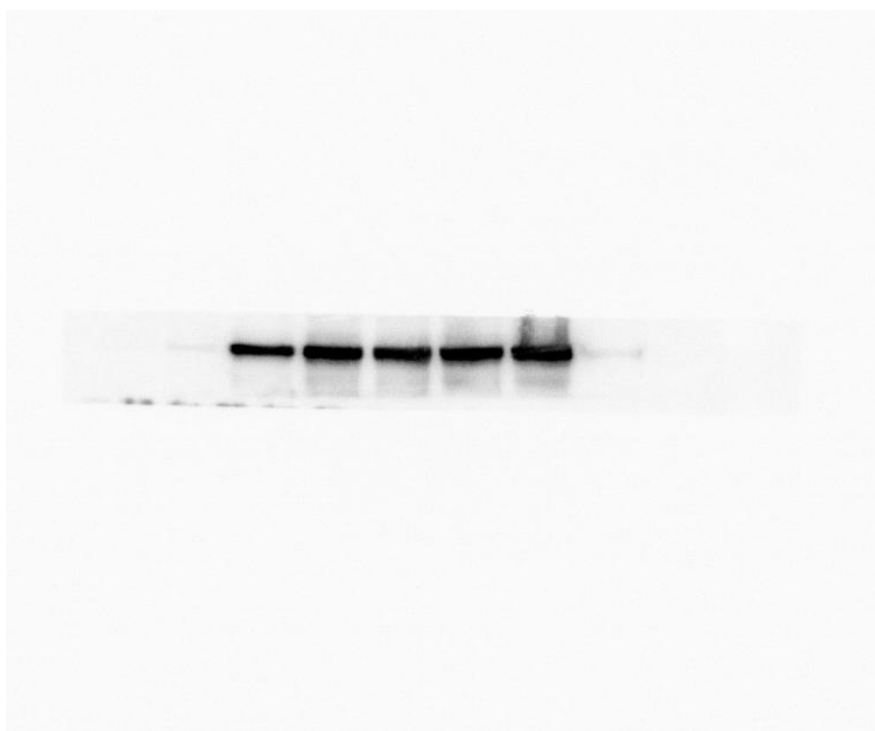

**P21**

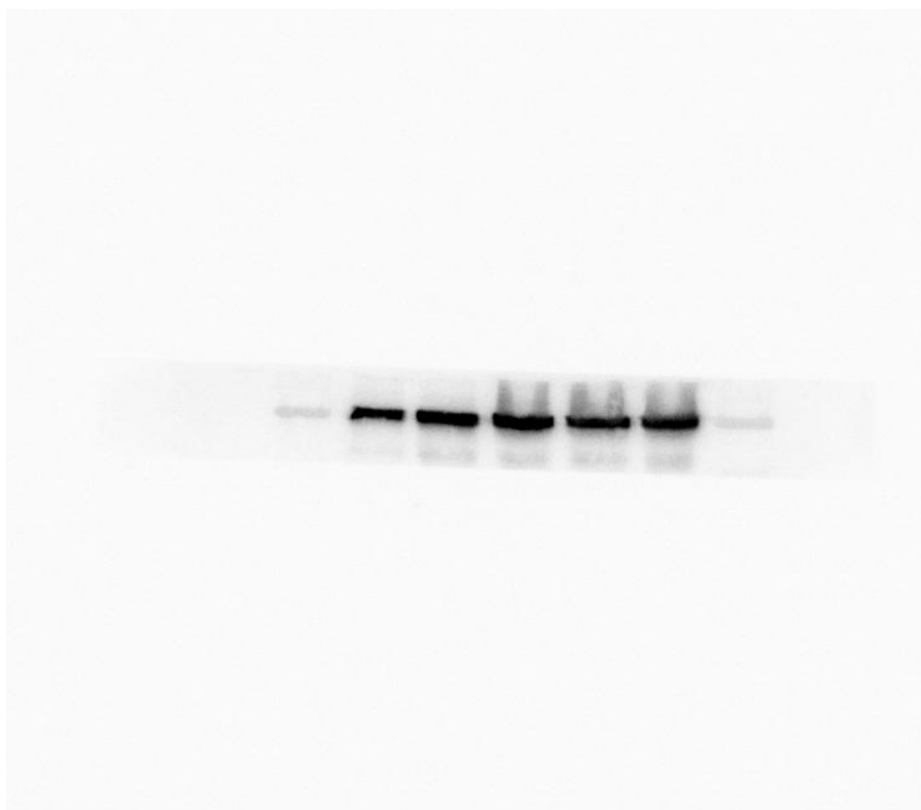

**P16**

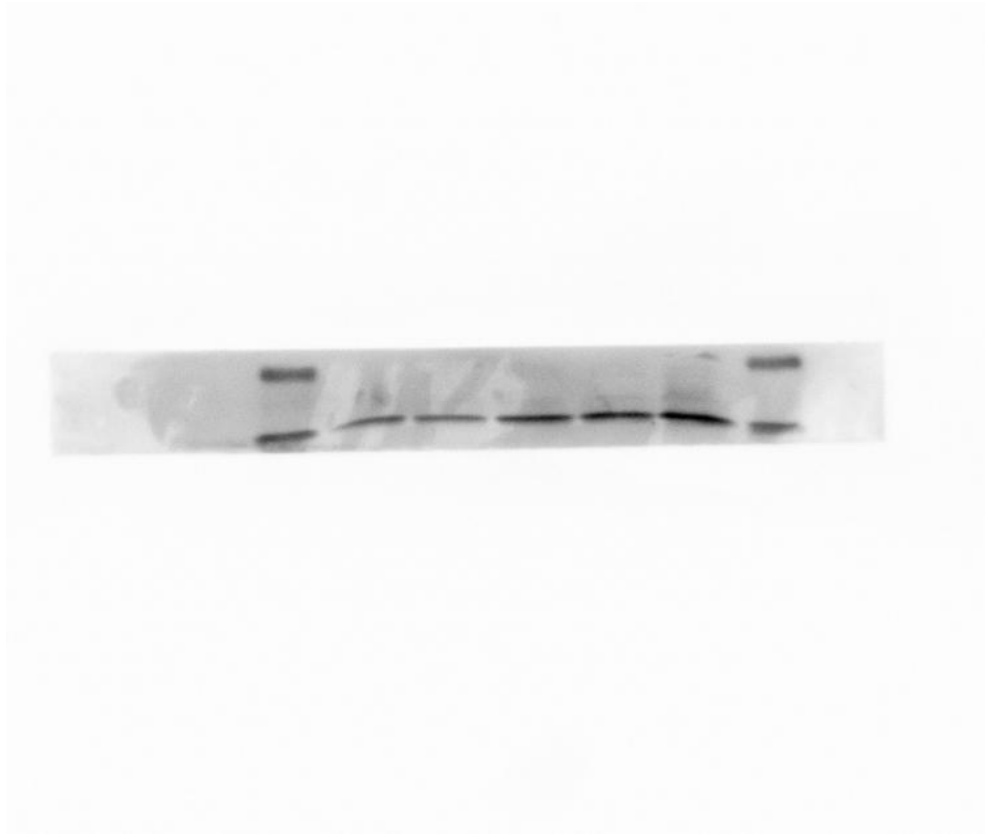

**Tubulin**

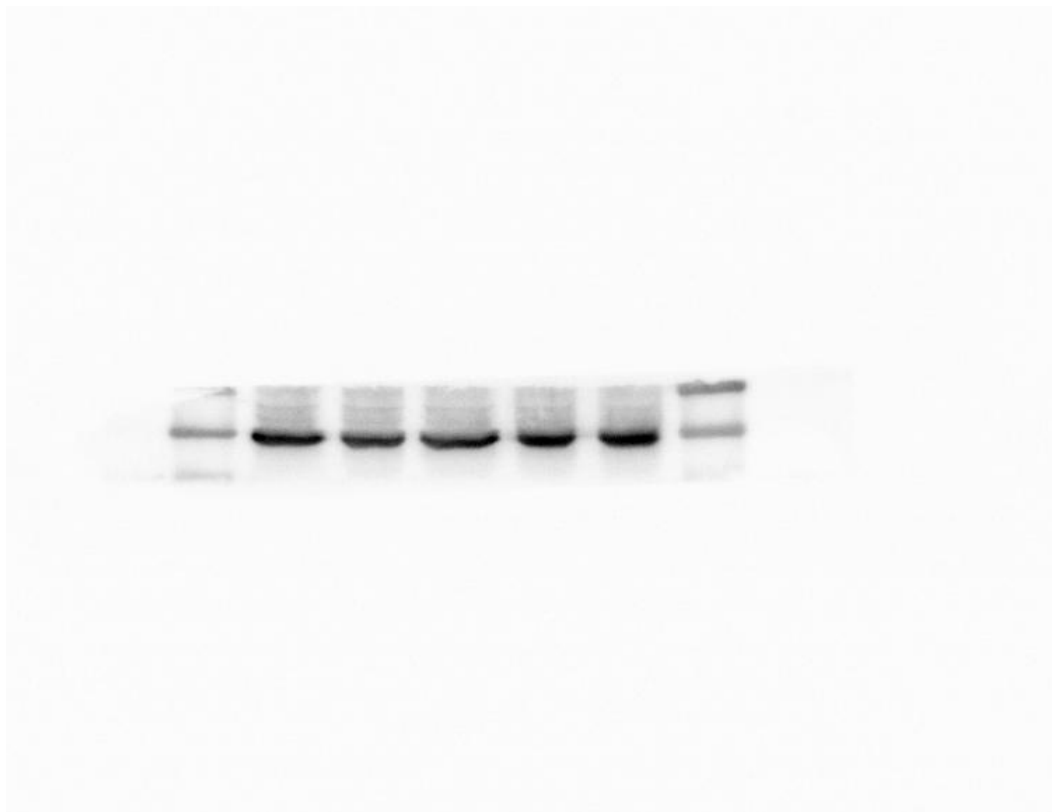

**FigS2H**

**PP53**

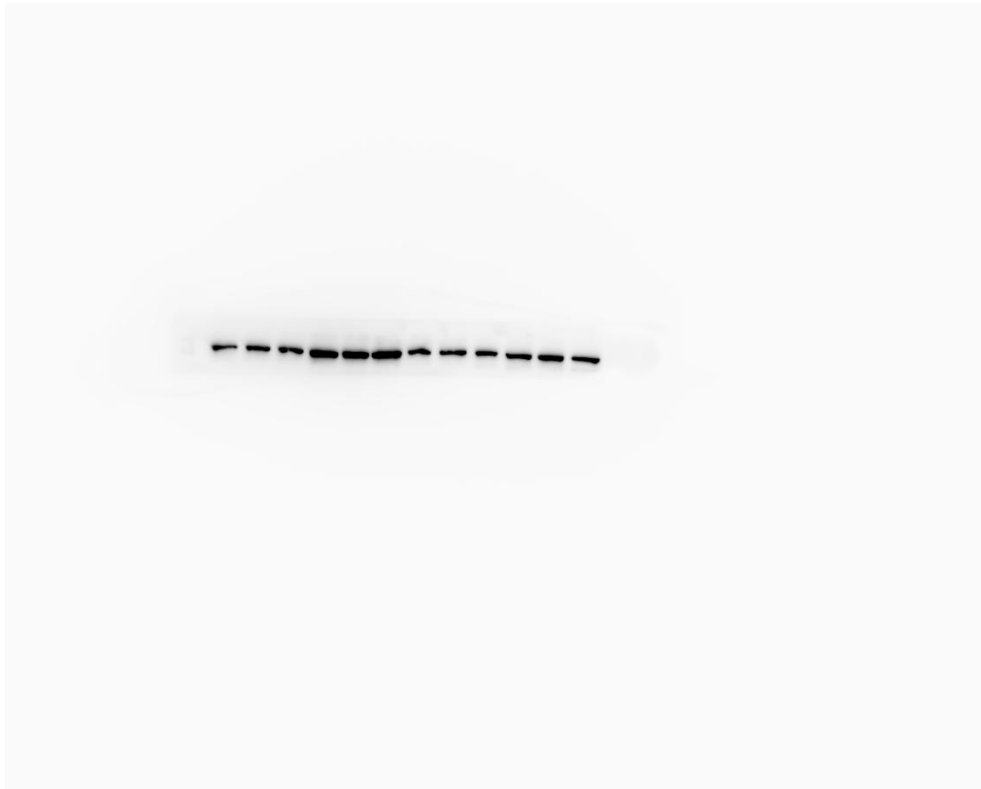

**P53**

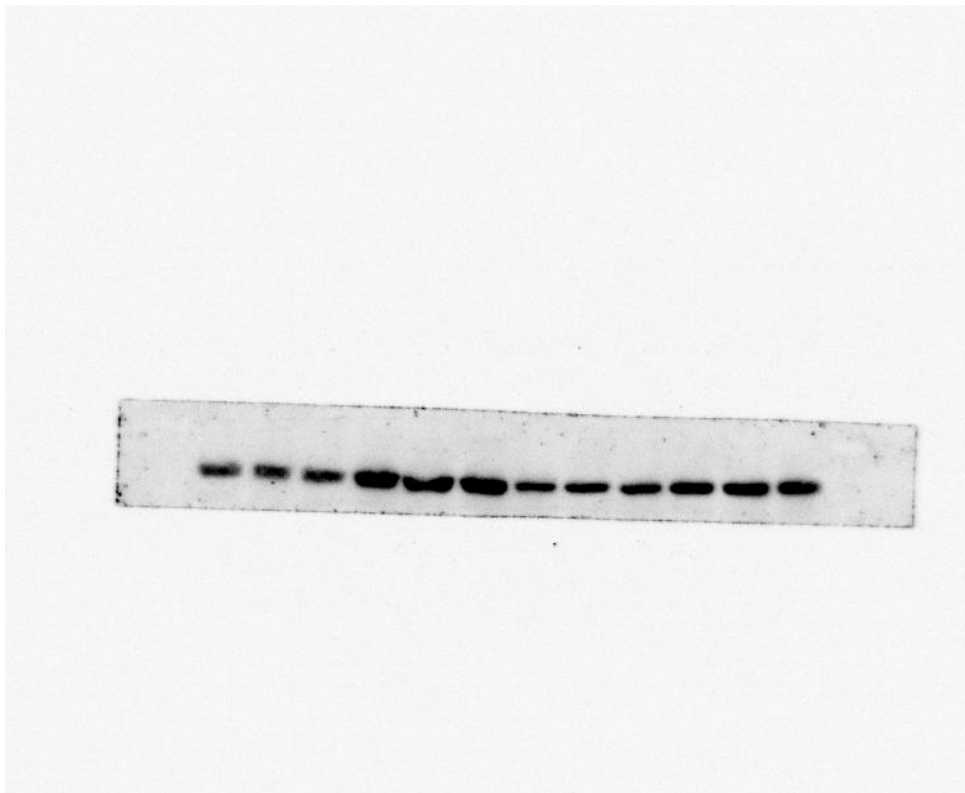

**P21**

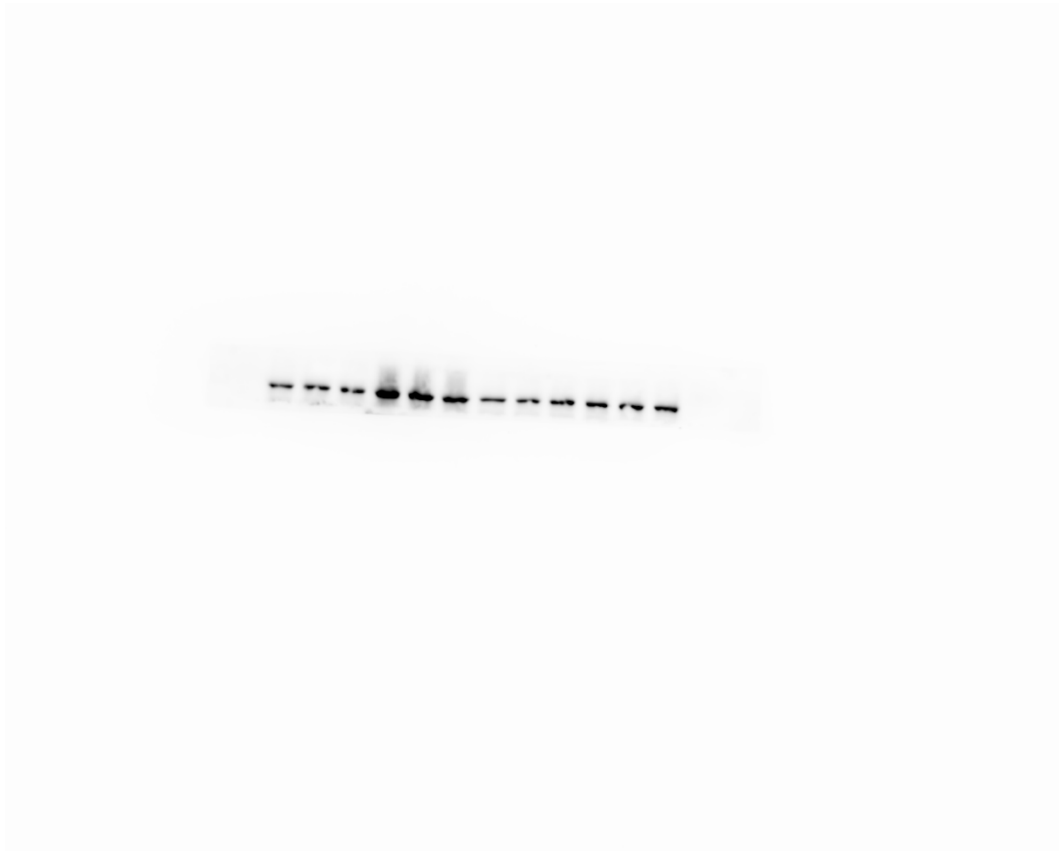

**P16**

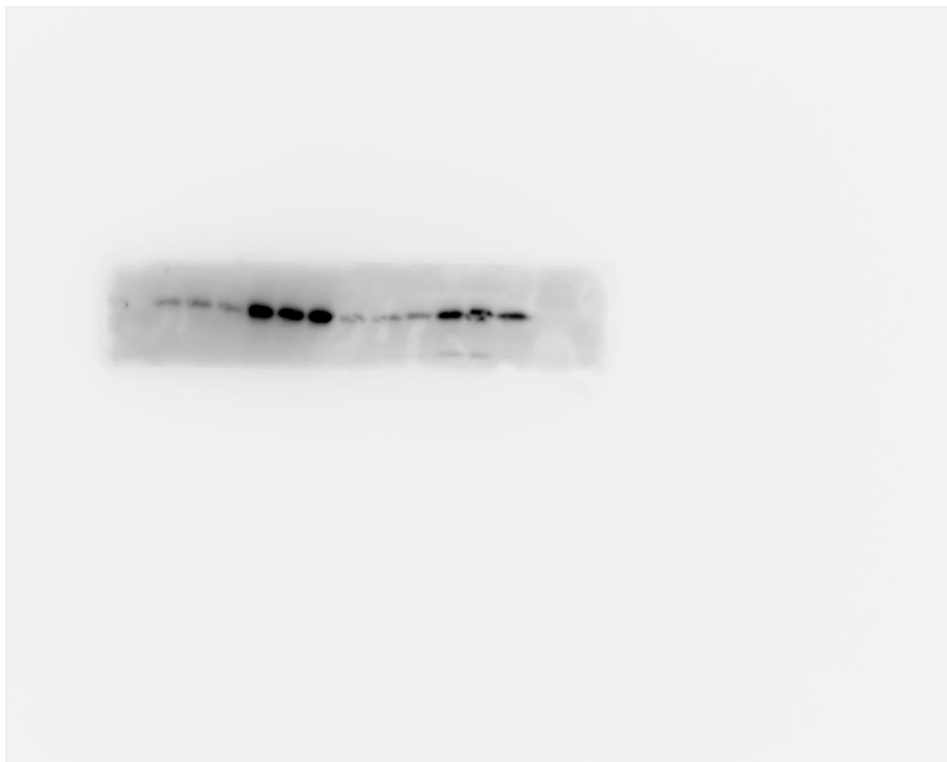

**GAPDH**

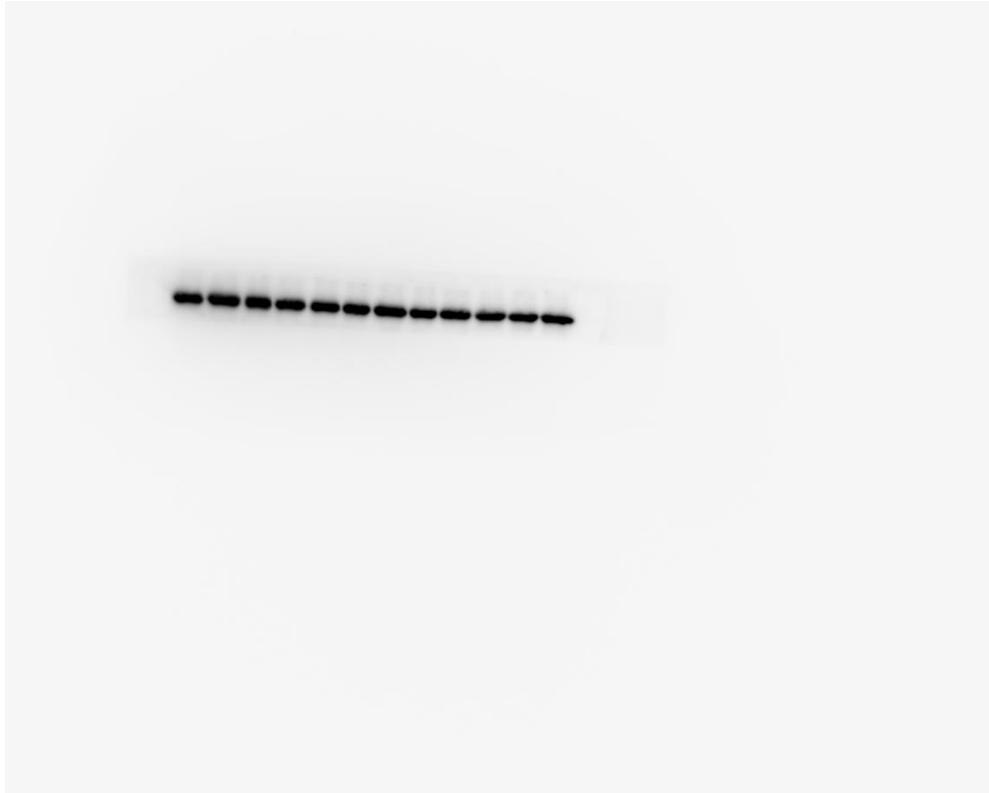

**FigS3A**

**HA-IP**

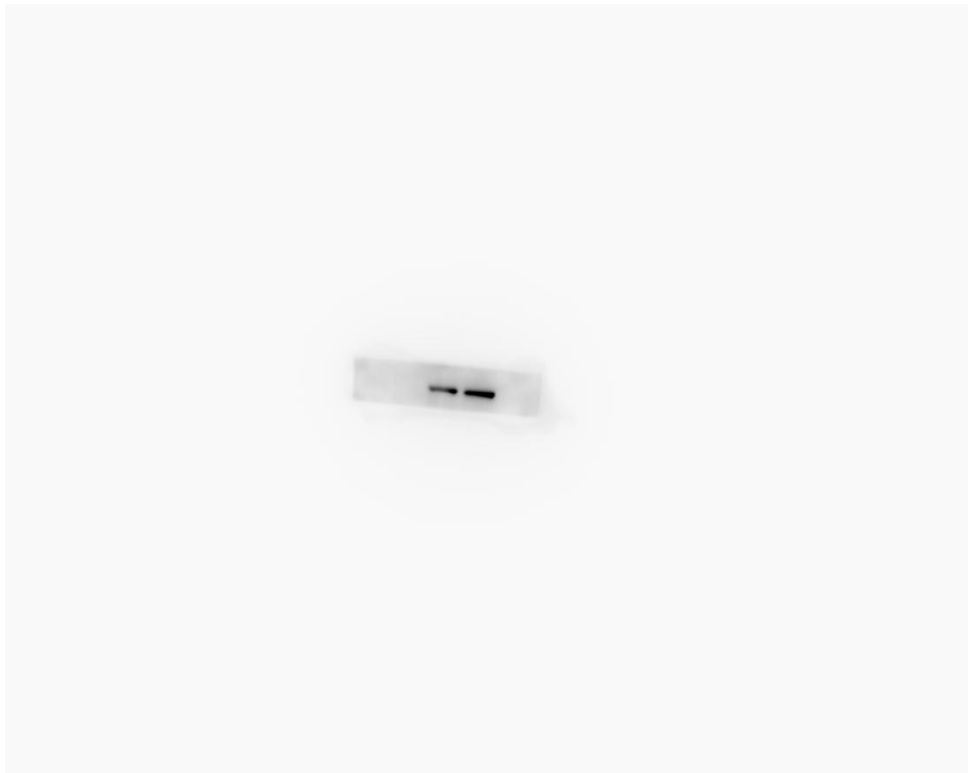

## GFP-IP

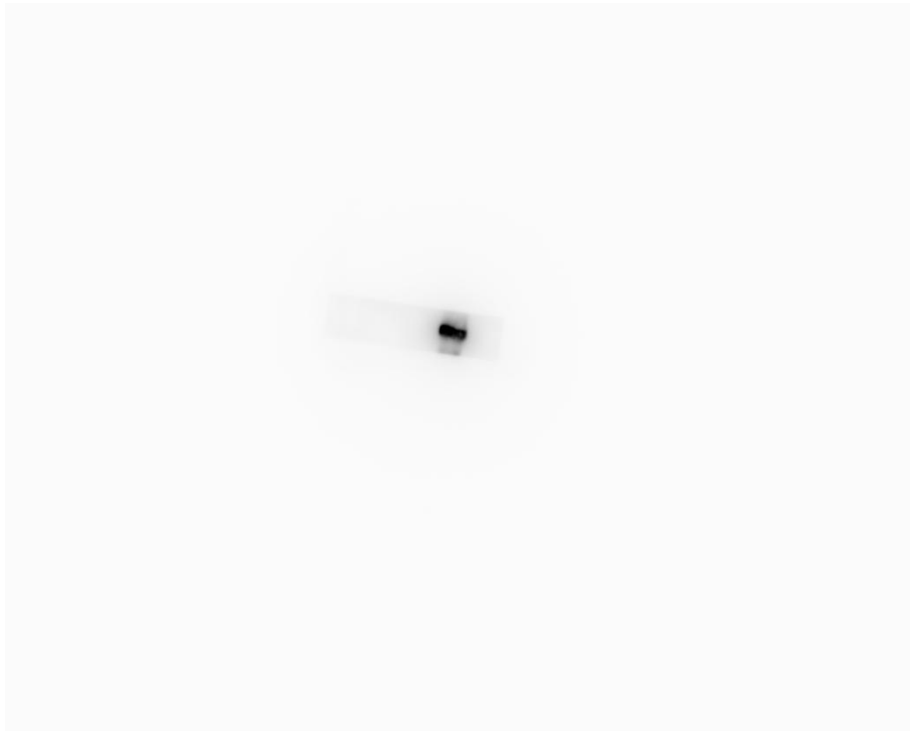

## HA-Input

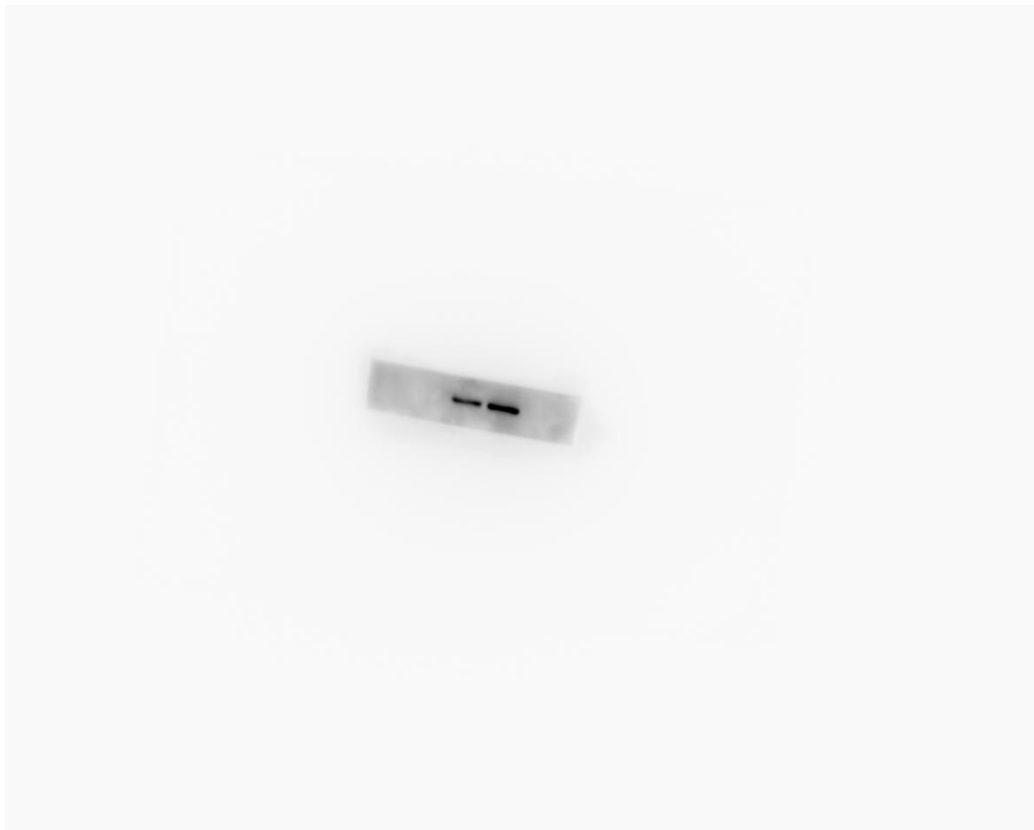

**GFP-Input**

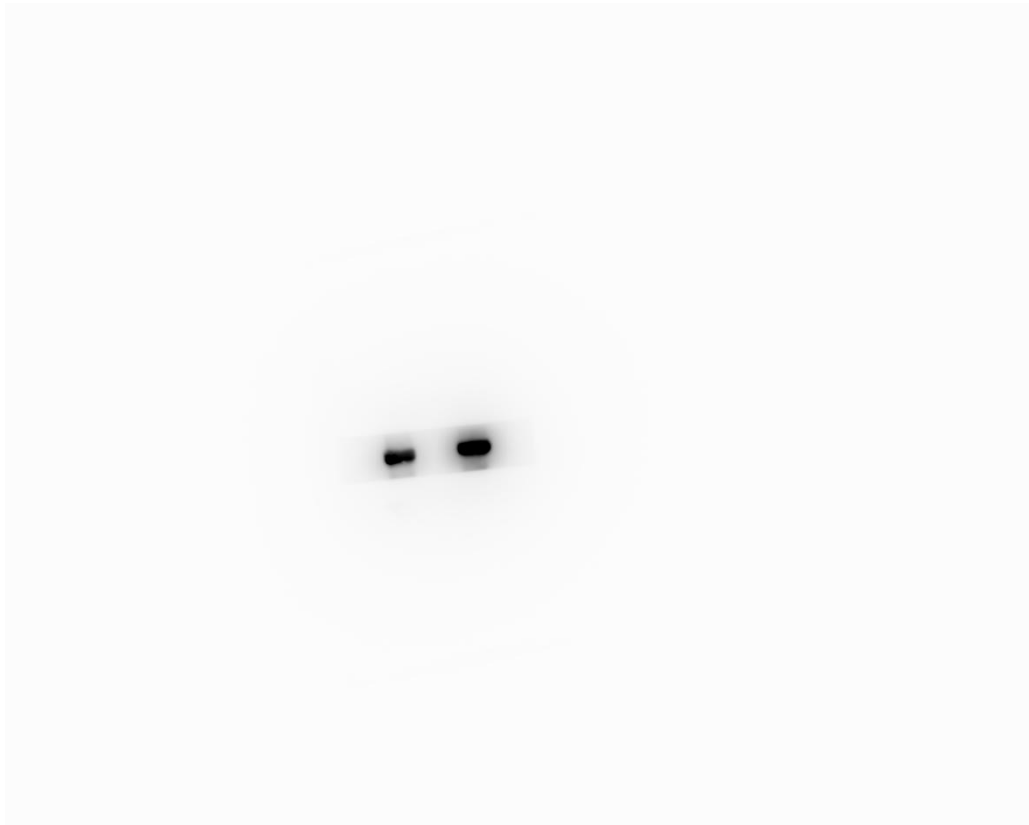

**GAPDH**

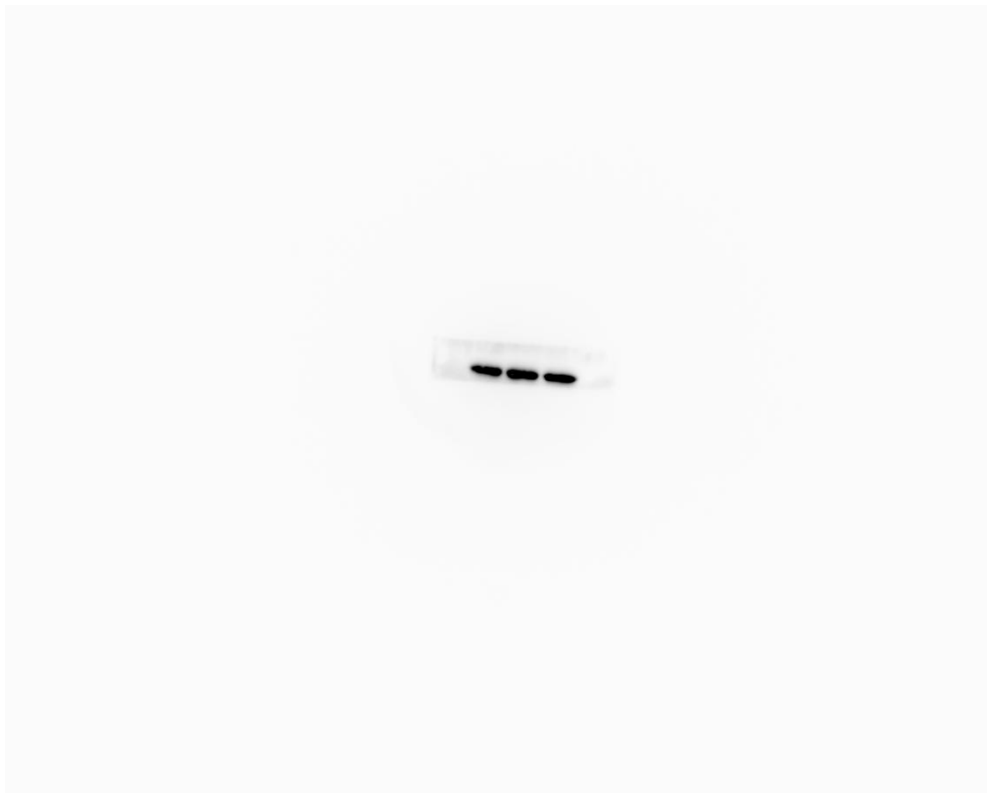

**FigS3C**

**GFP-IP**

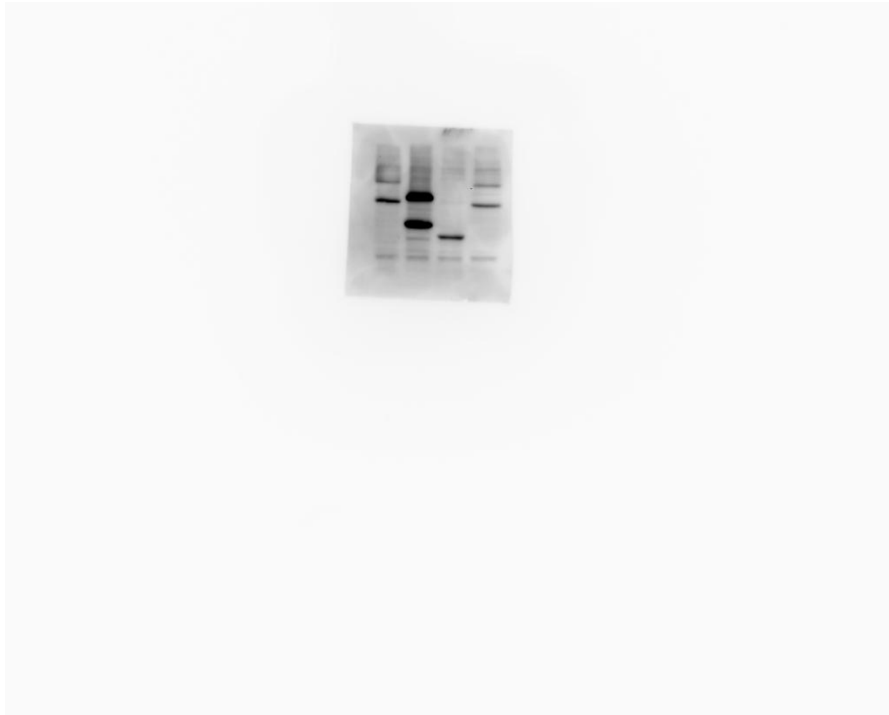

**HA-IP**

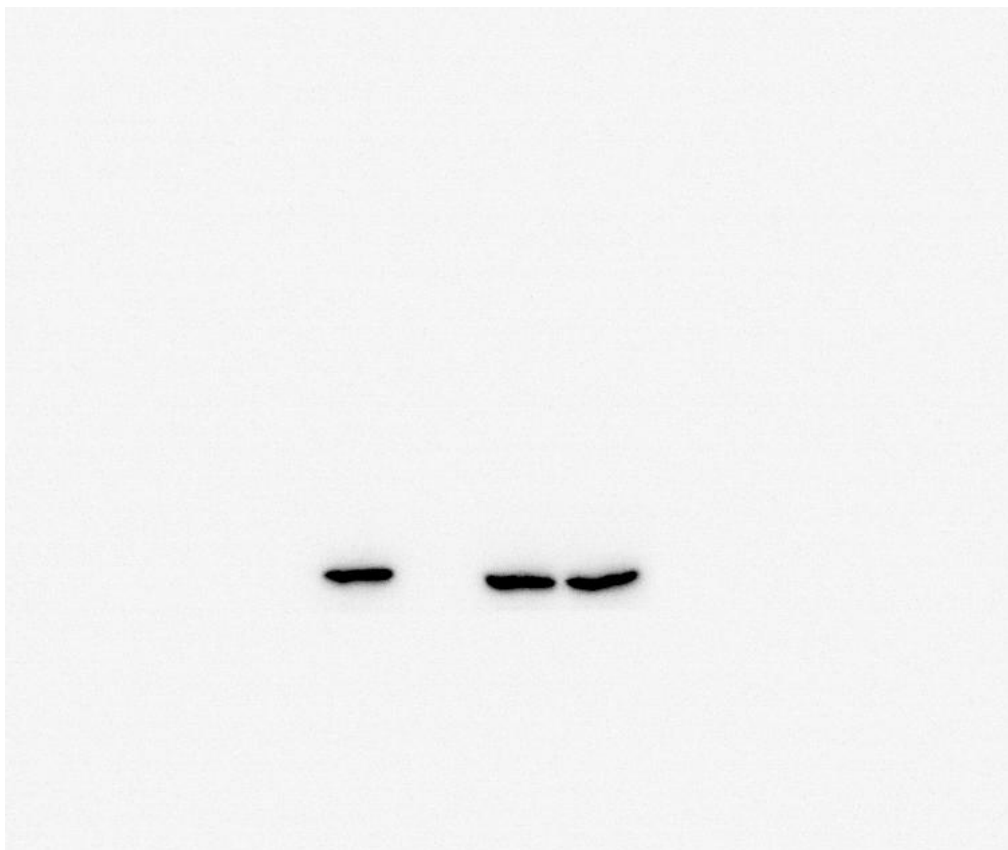

**GFP-Input**

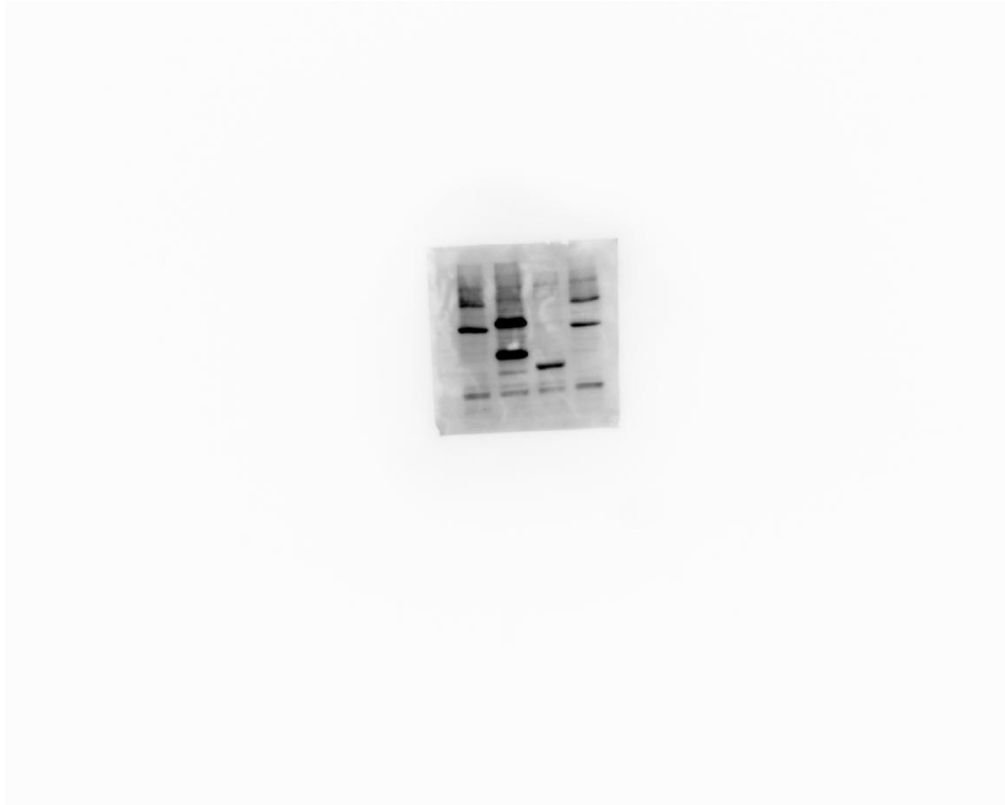

**HA-Input**

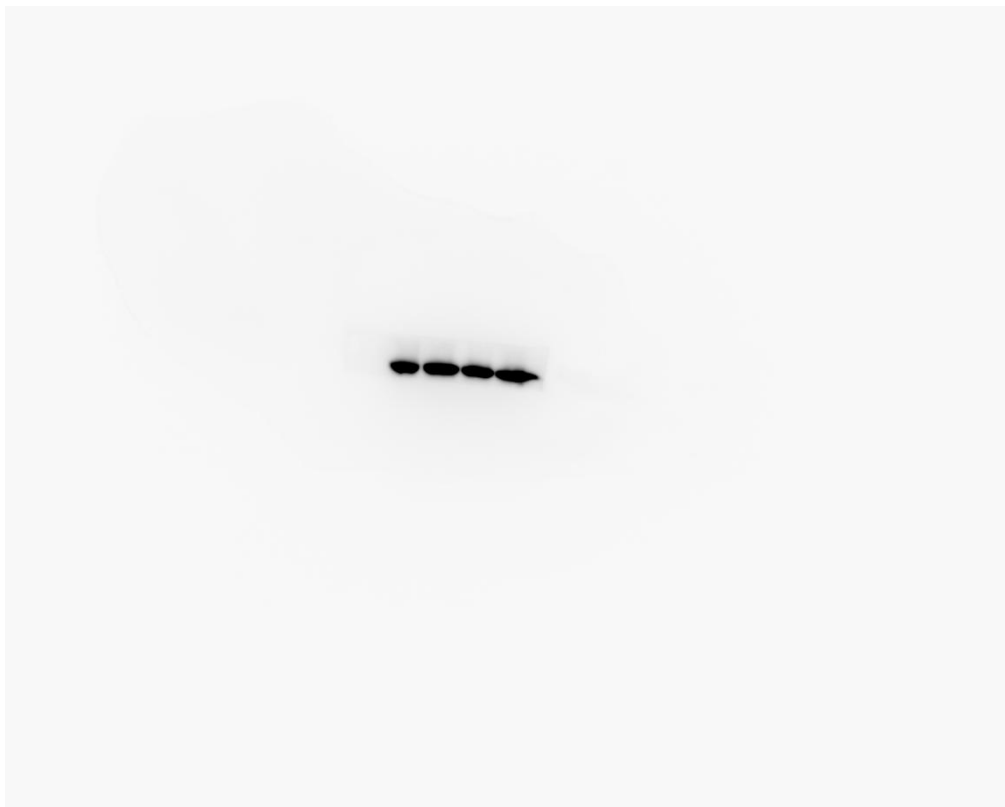

**FigS3D**

**PRMT2**

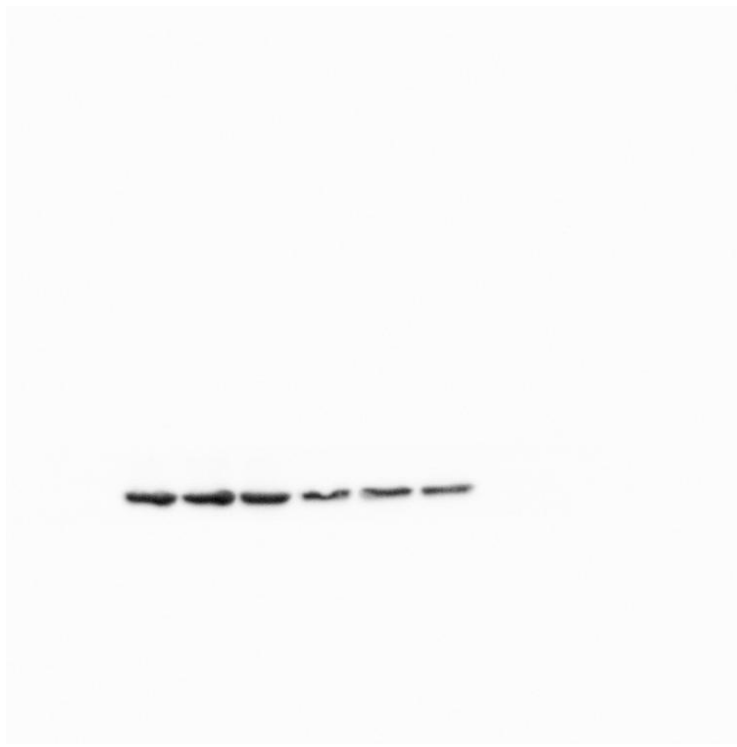

**GAPDH**

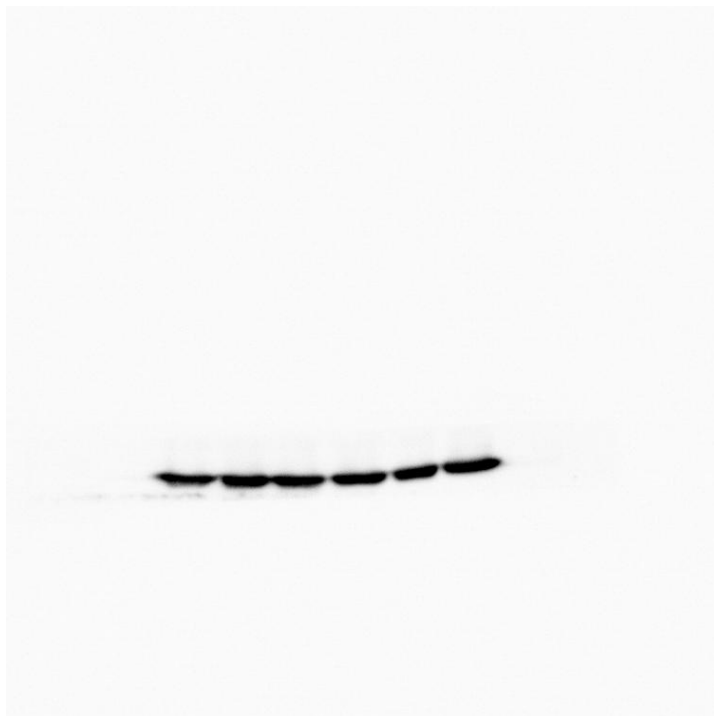

**FigS3E**

**HIF1 $\alpha$**

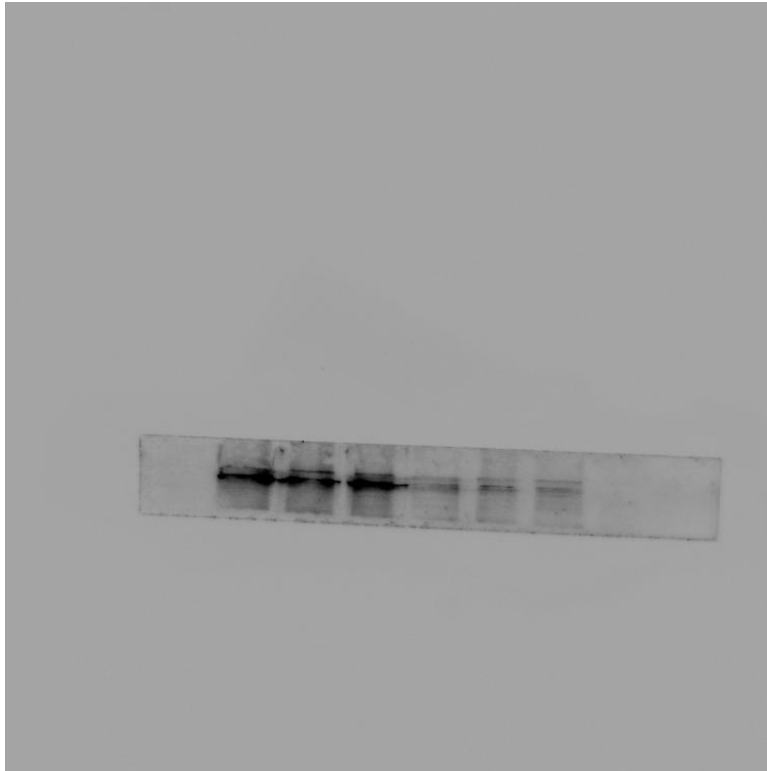

**PRMT2**

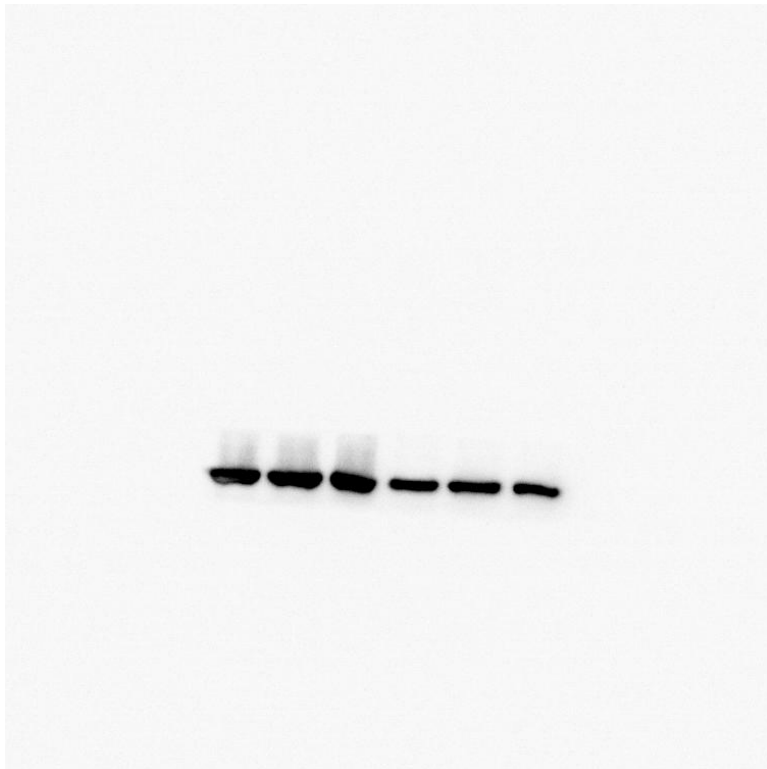

**GAPDH**

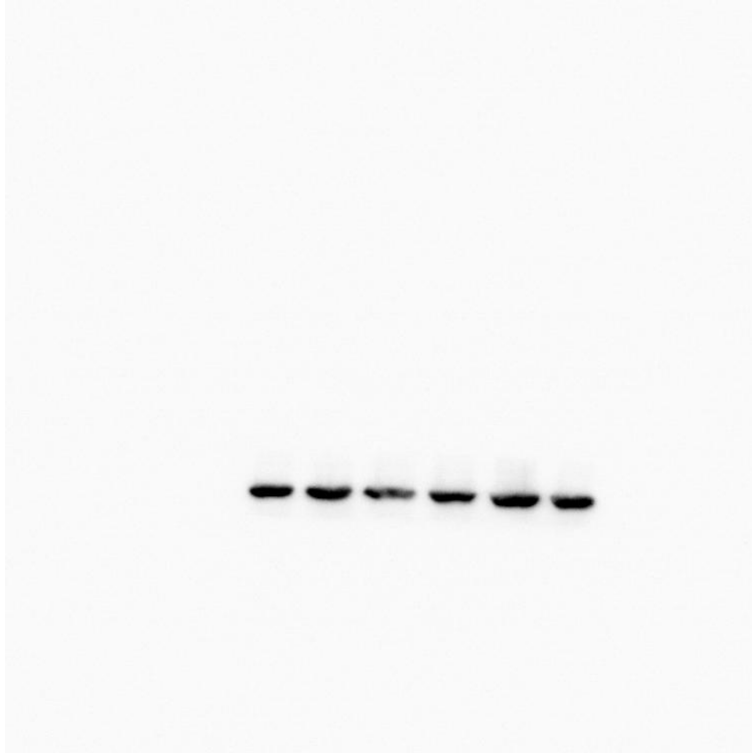

**FigS3F**

**HIF1 $\alpha$**

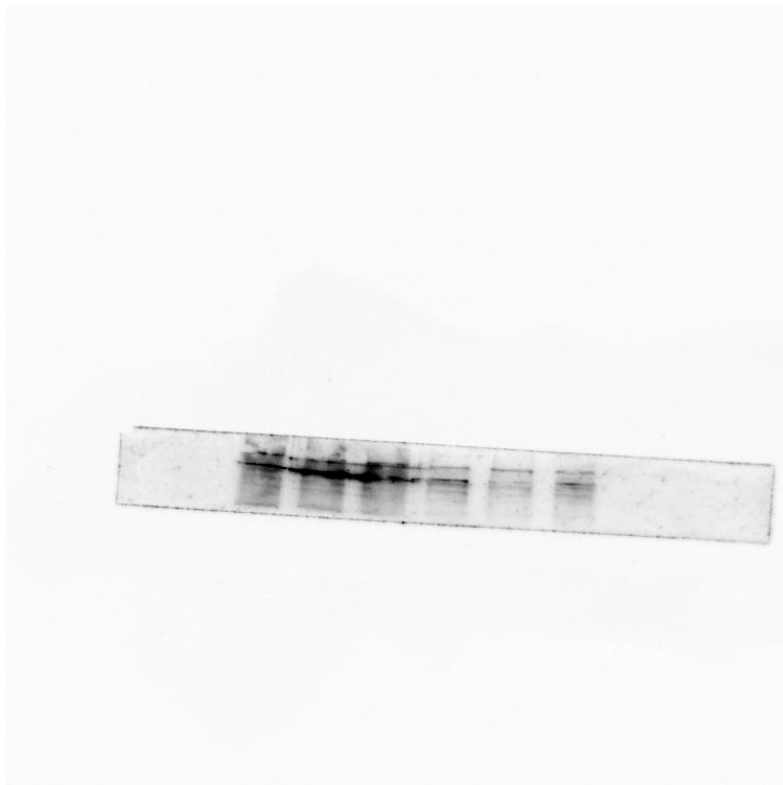

**PRMT2**

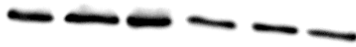

**GPADH**

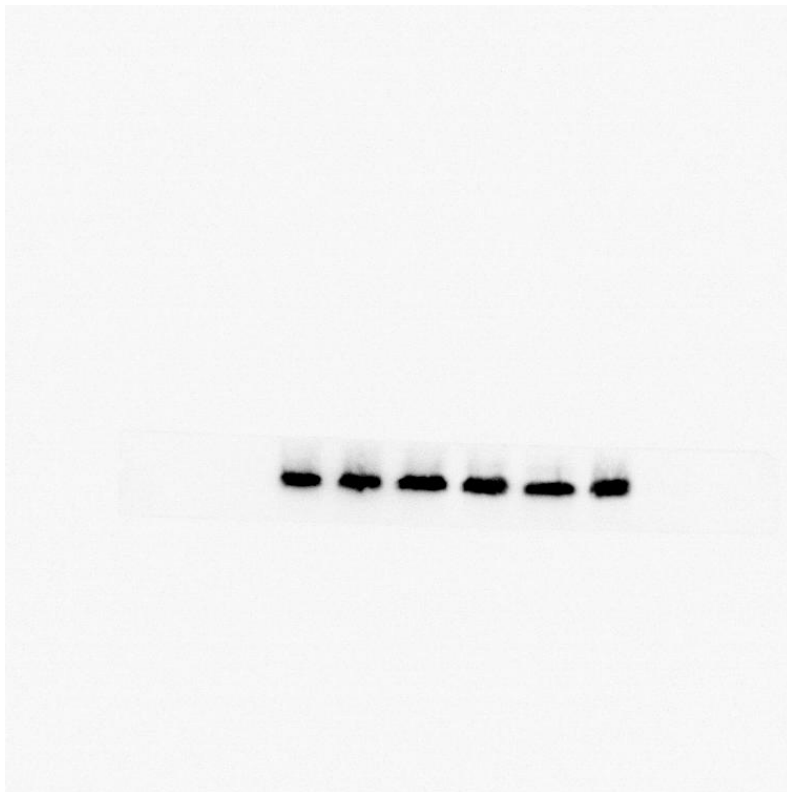

**FigS3I**

**PP53**

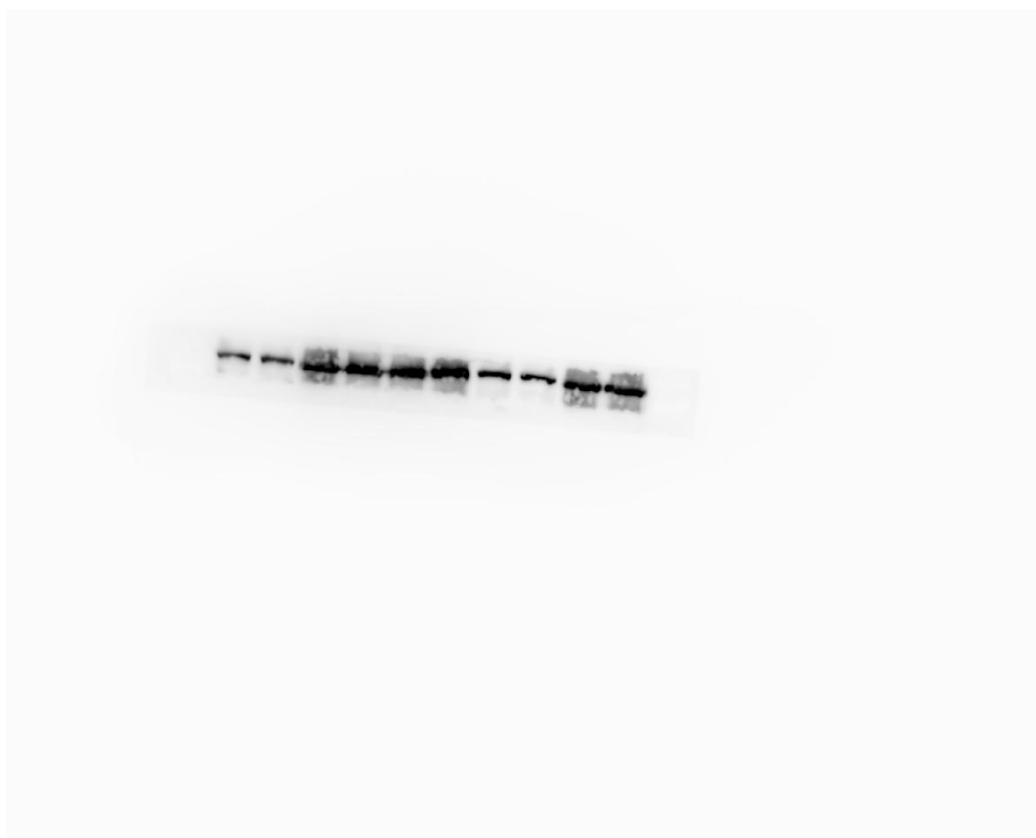

**P53**

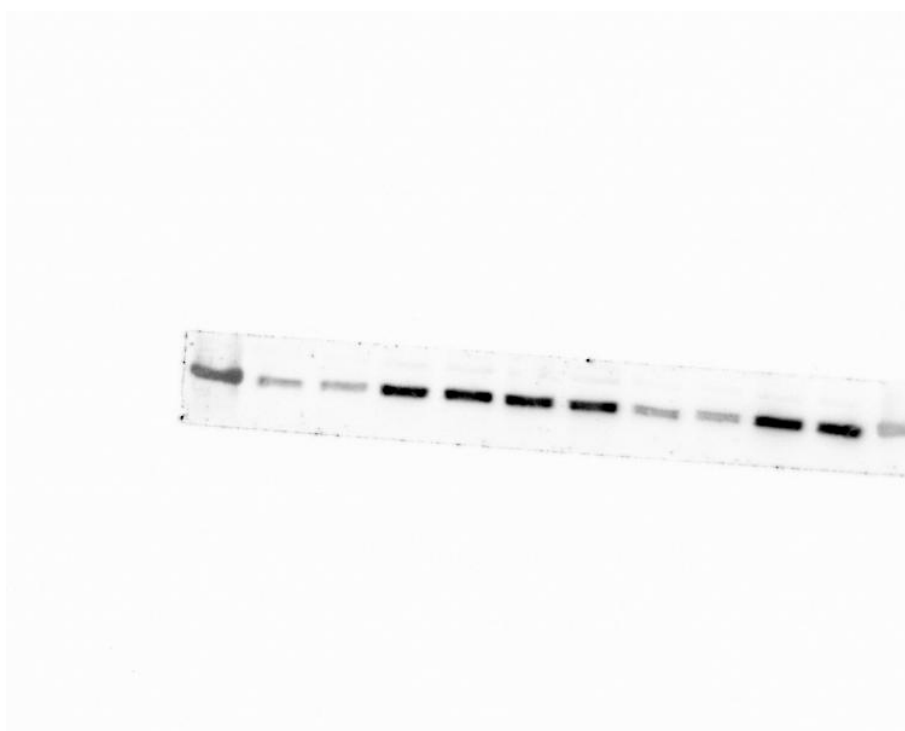

**P21**

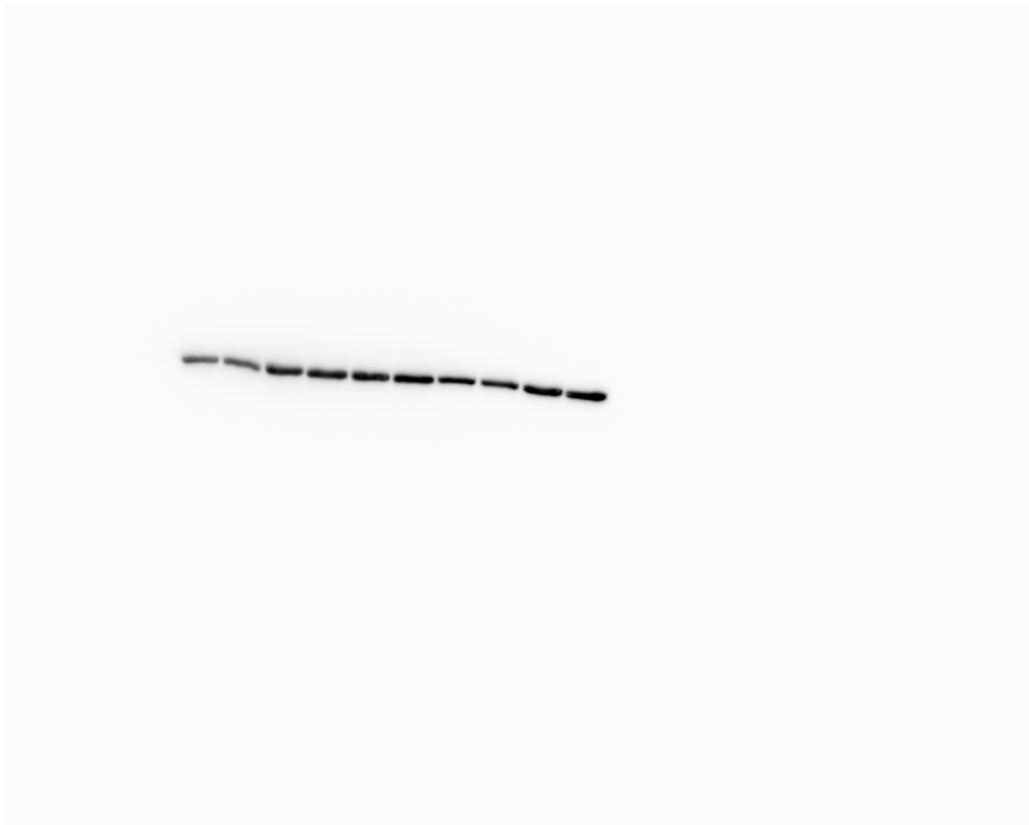

**P16**

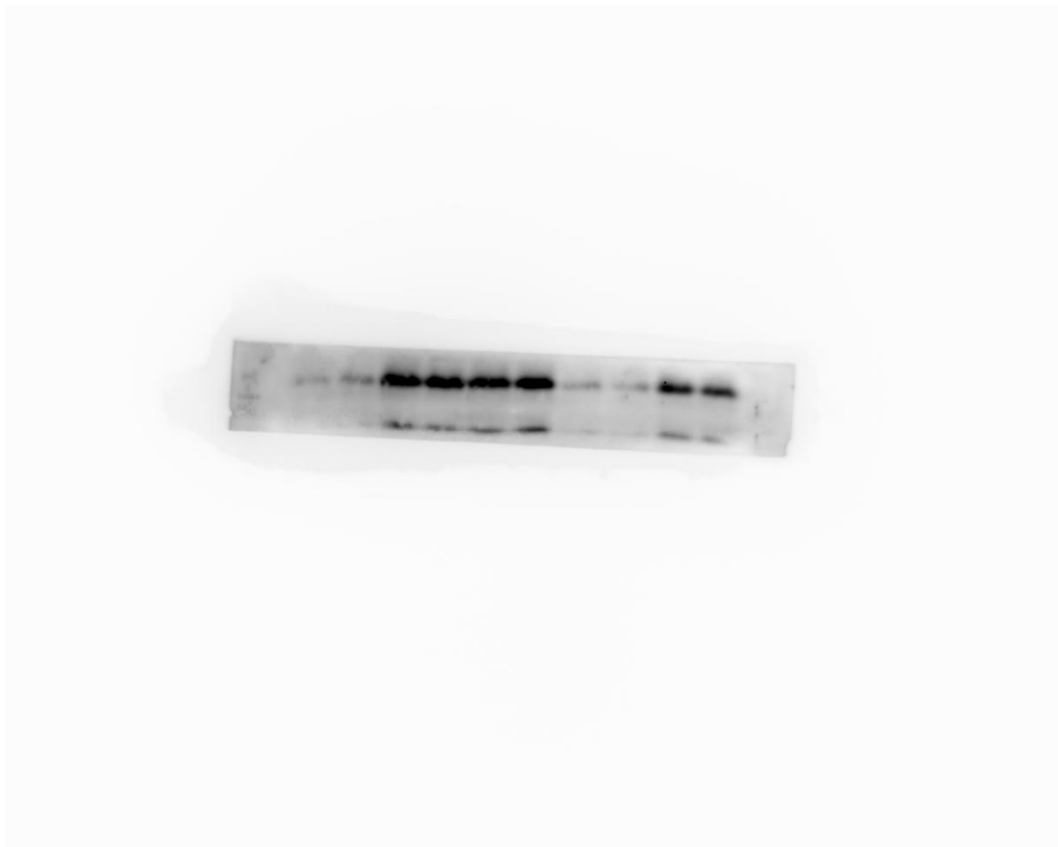

**GAPDH**

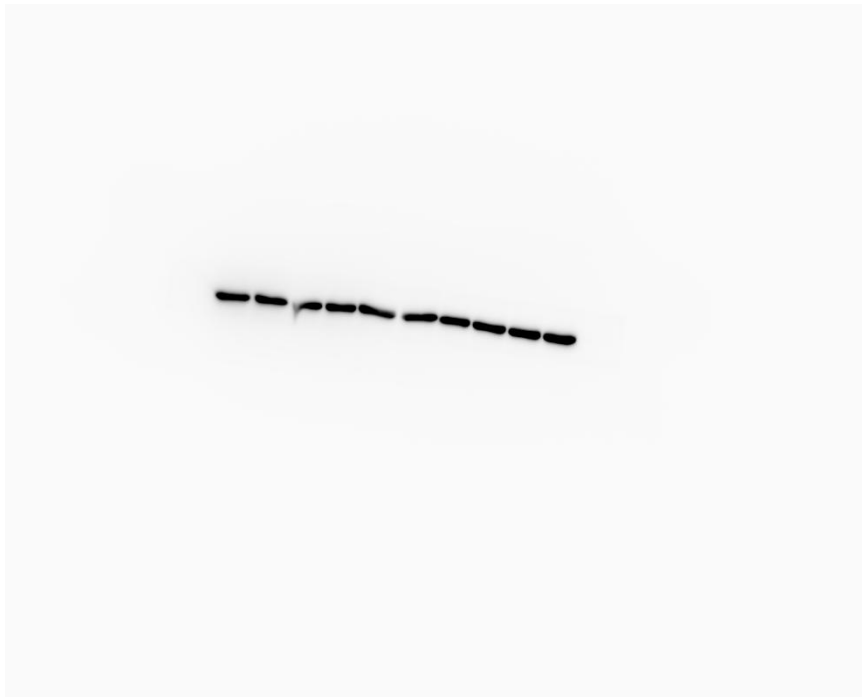

**FigS5A**

**NUMA1**

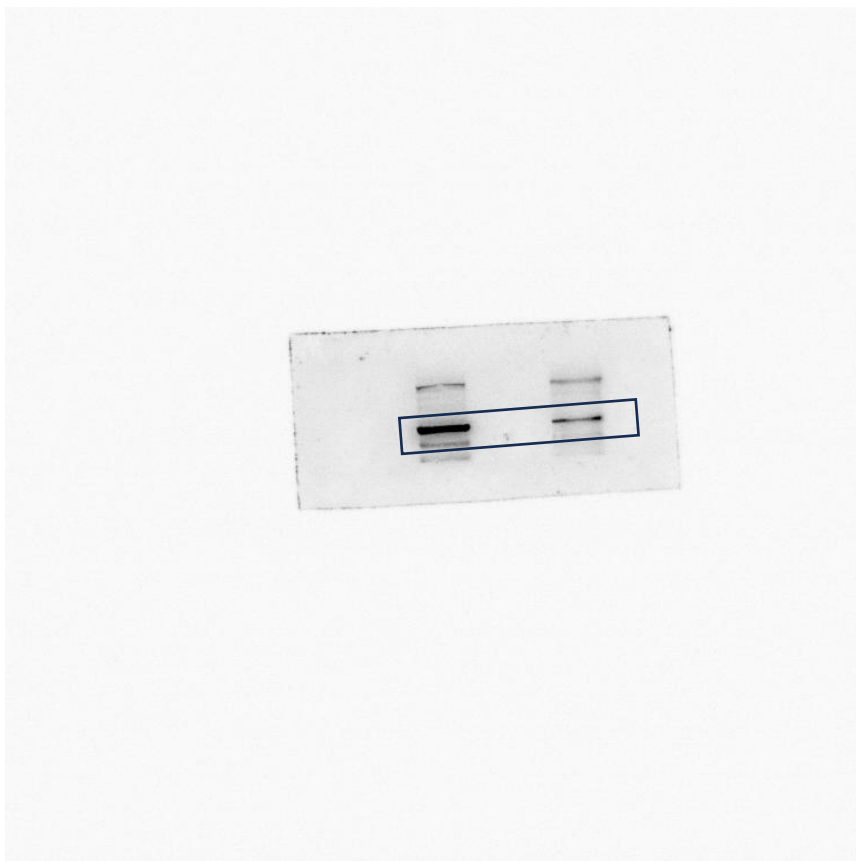

## THRAP3

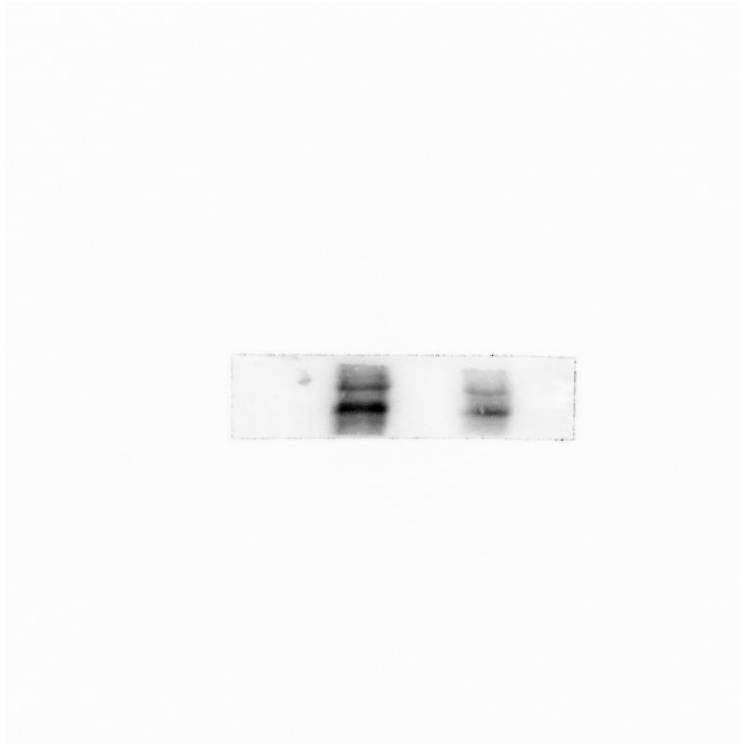

## H1.2

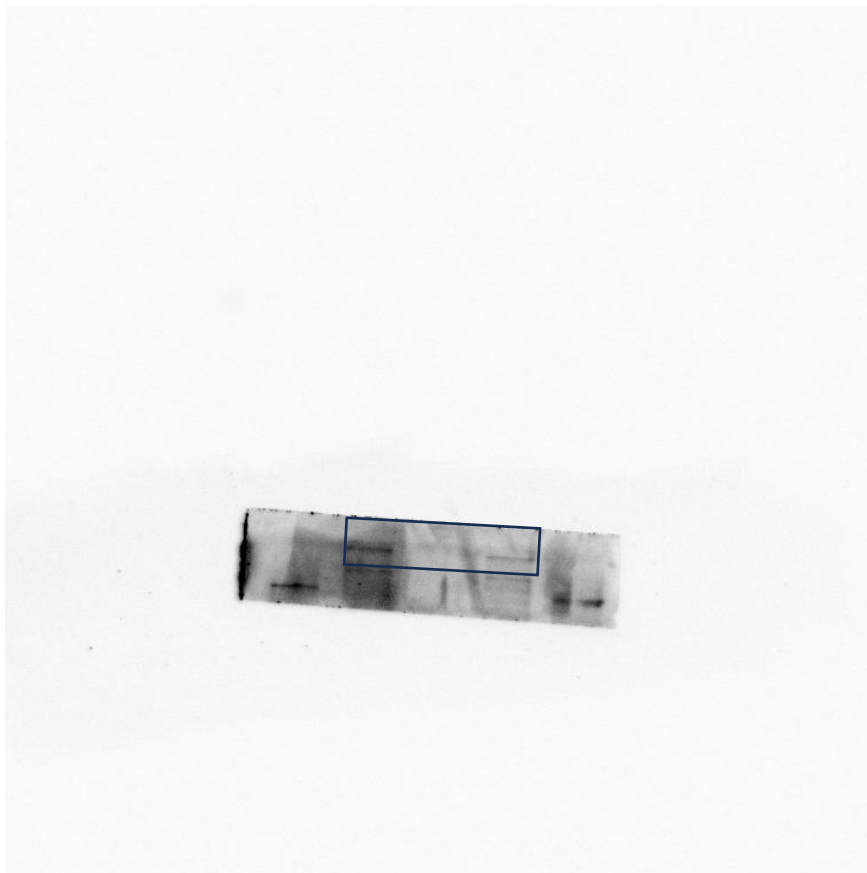

**SEC23A**

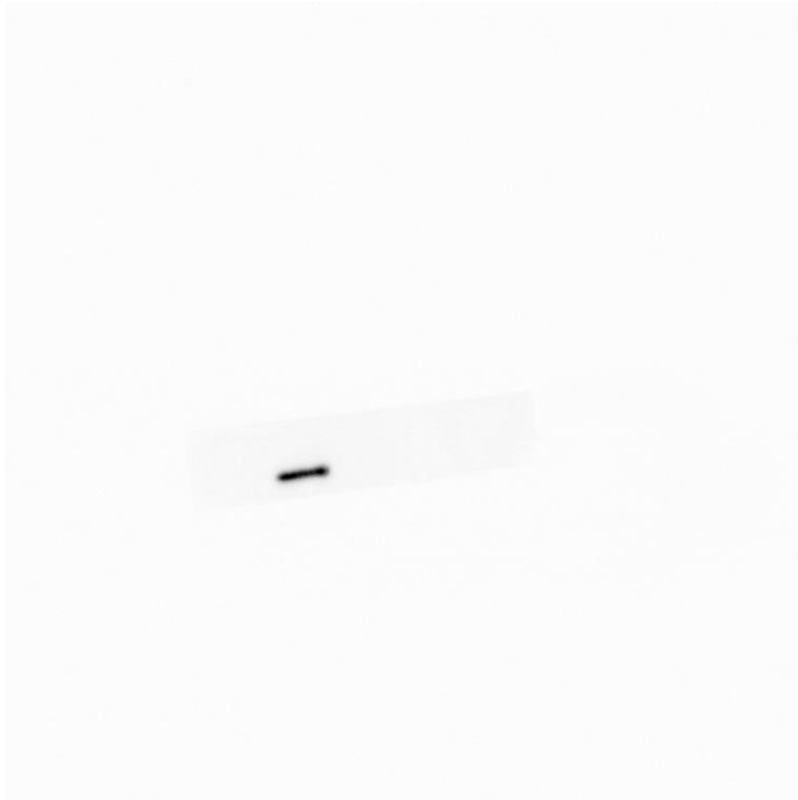

**RPL29**

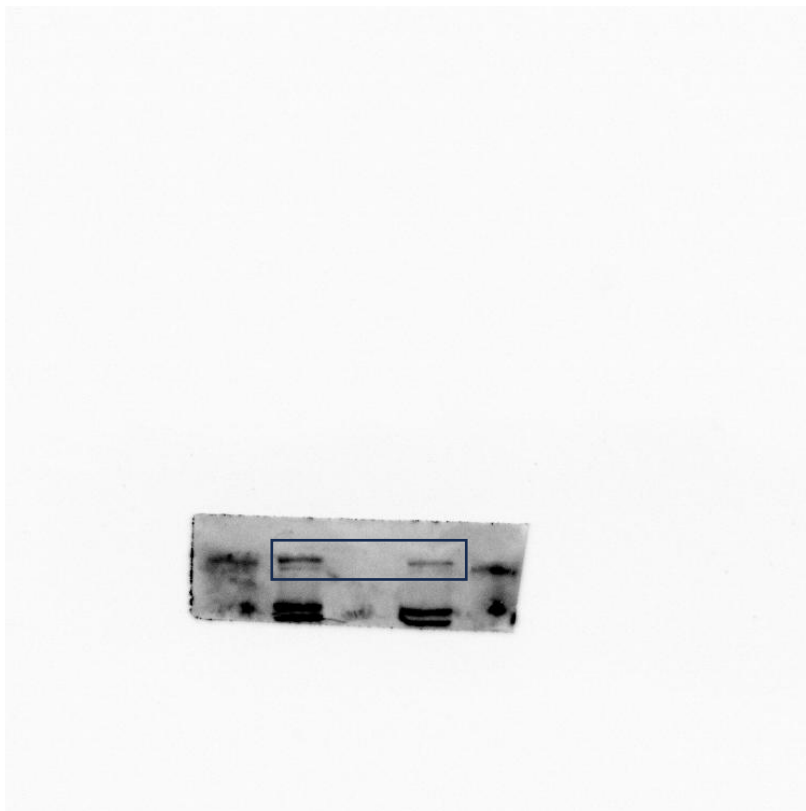

**TRA2B**

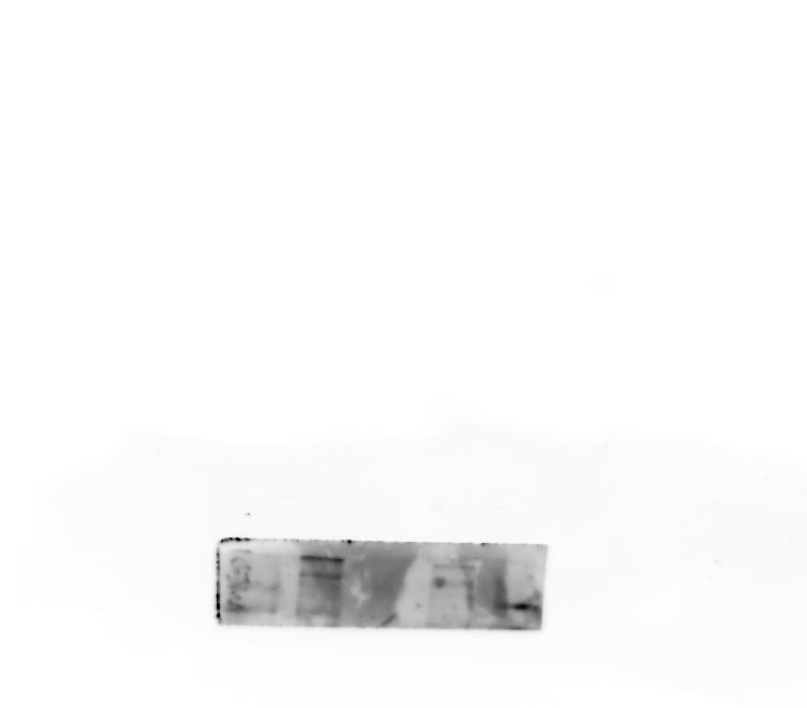

**MED12**

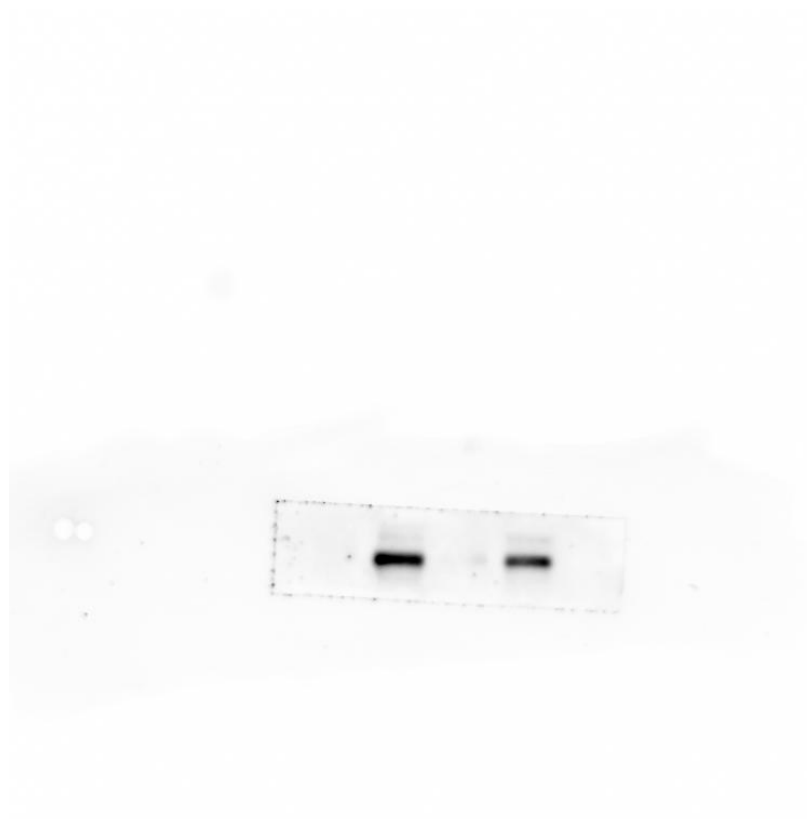

**FBXO7**

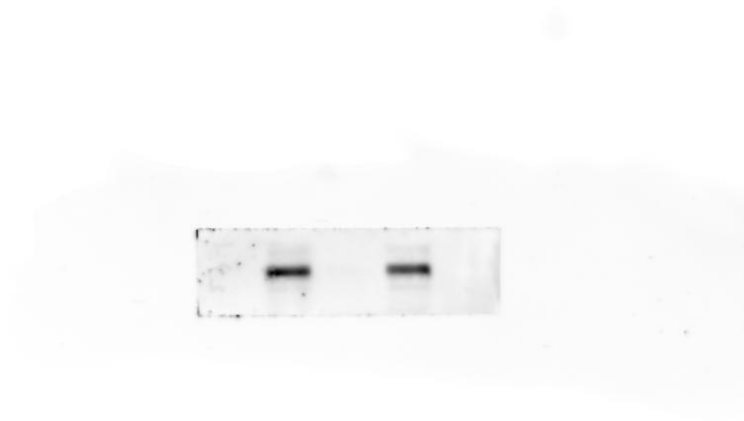

**FigS5B**

**Flag-IP**

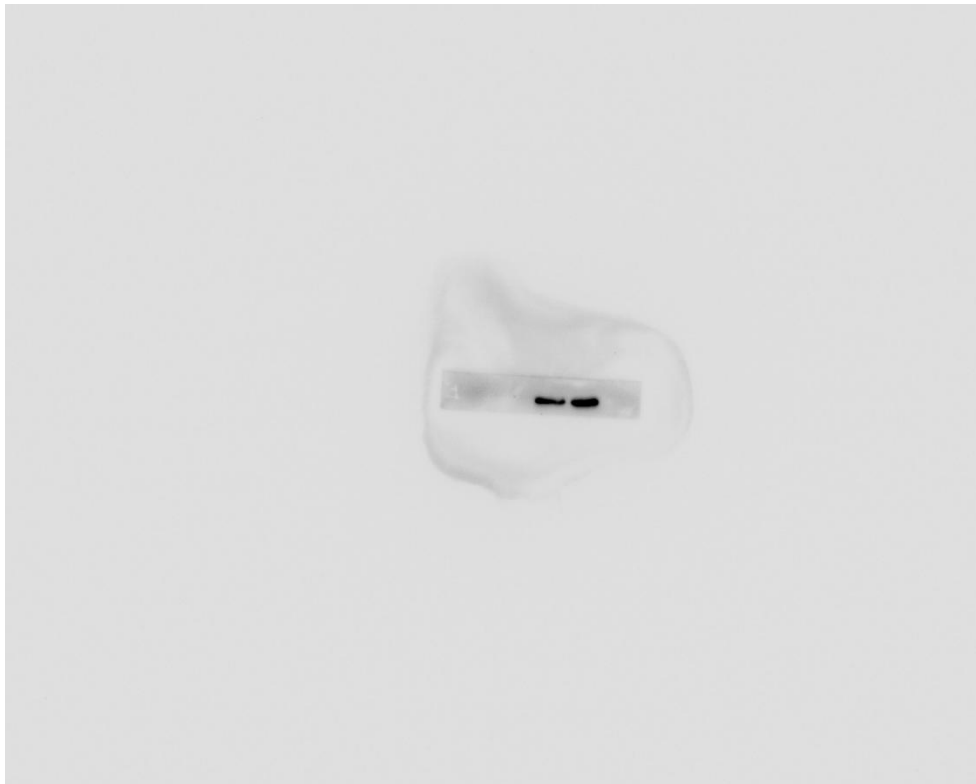

## GFP-IP

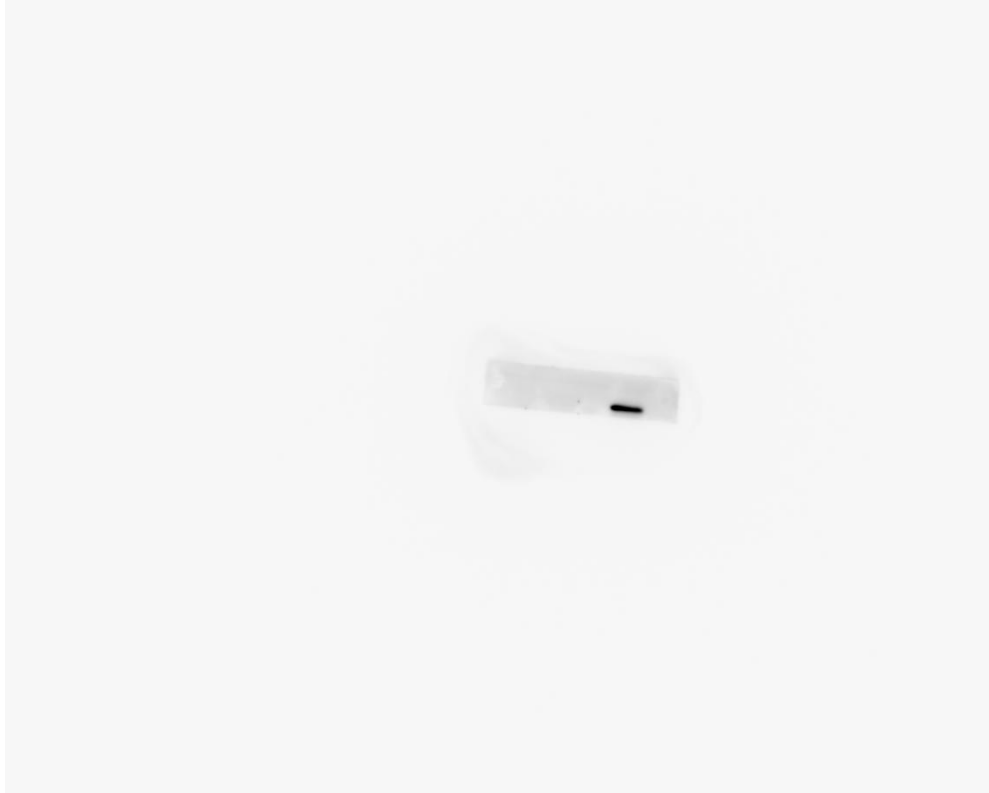

## Flag-Input

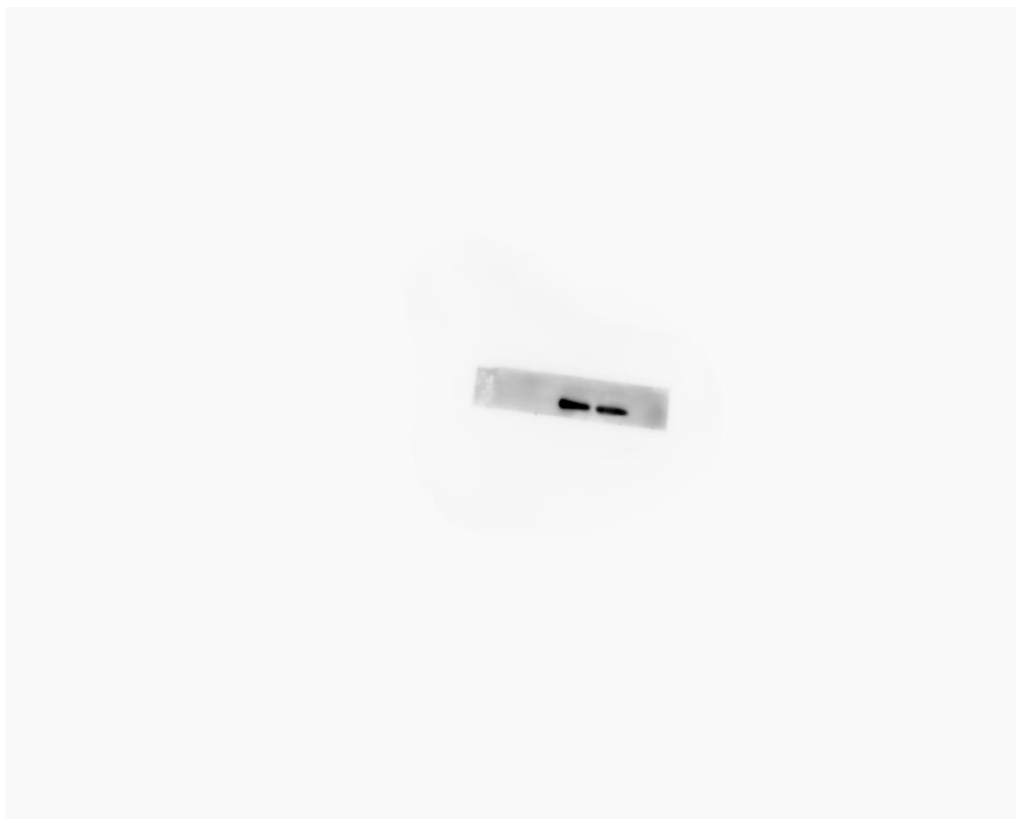

**GFP-Input**

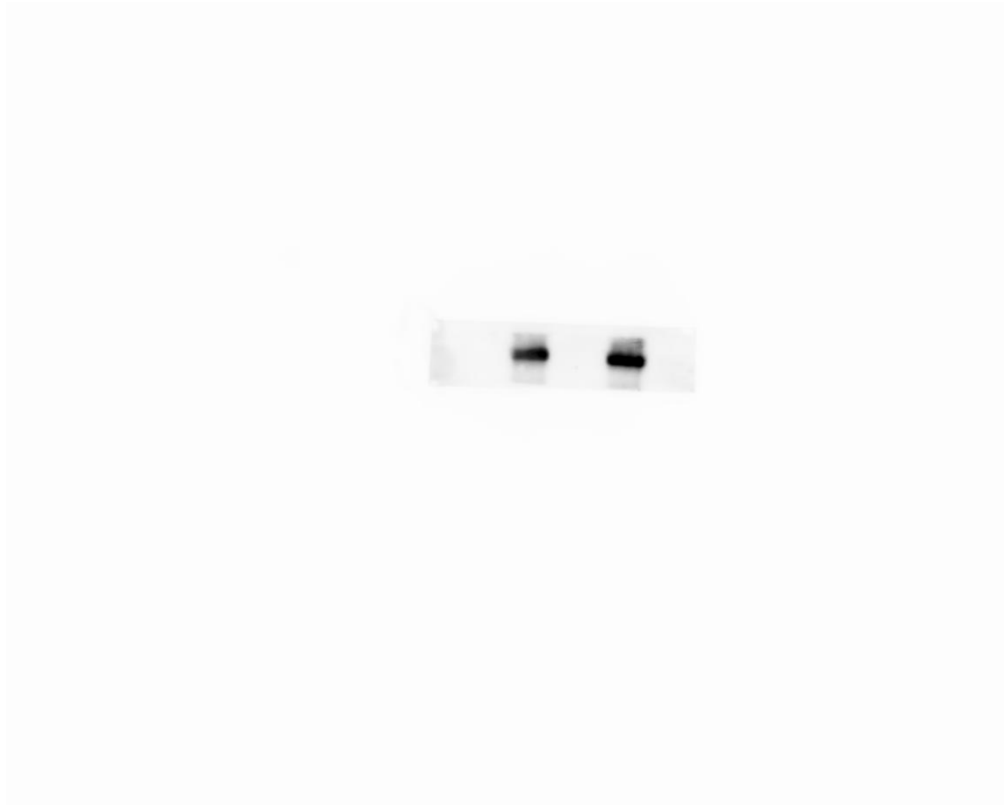

**GAPDH**

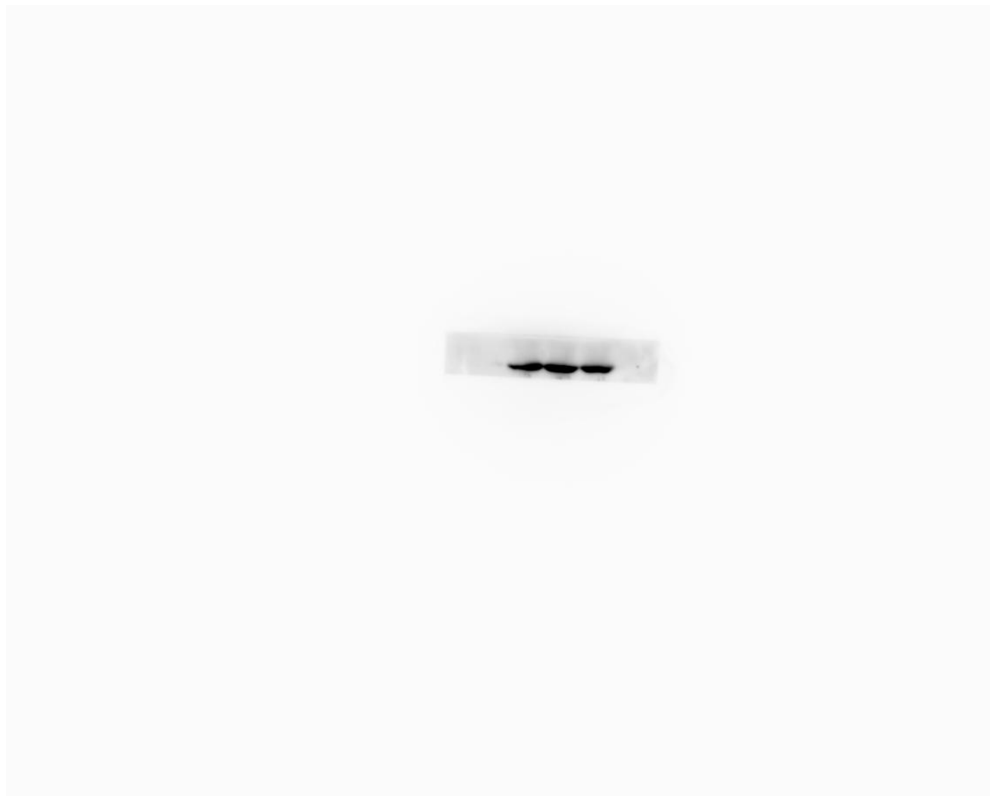

**FigS5D**

**Flag-IP**

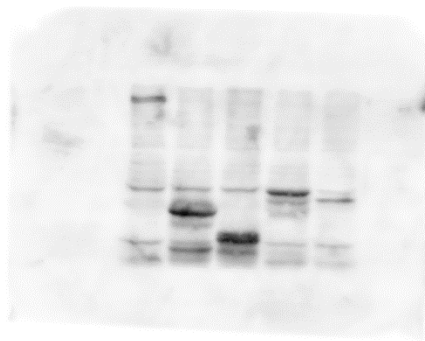

**GFP-IP**

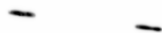

## Flag-Input

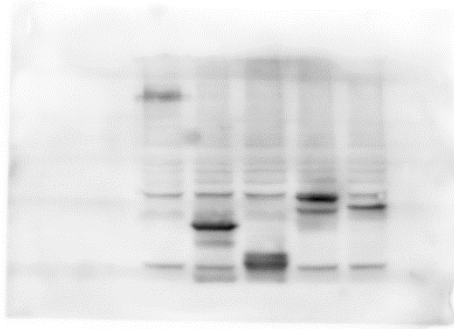

## GFP-Input

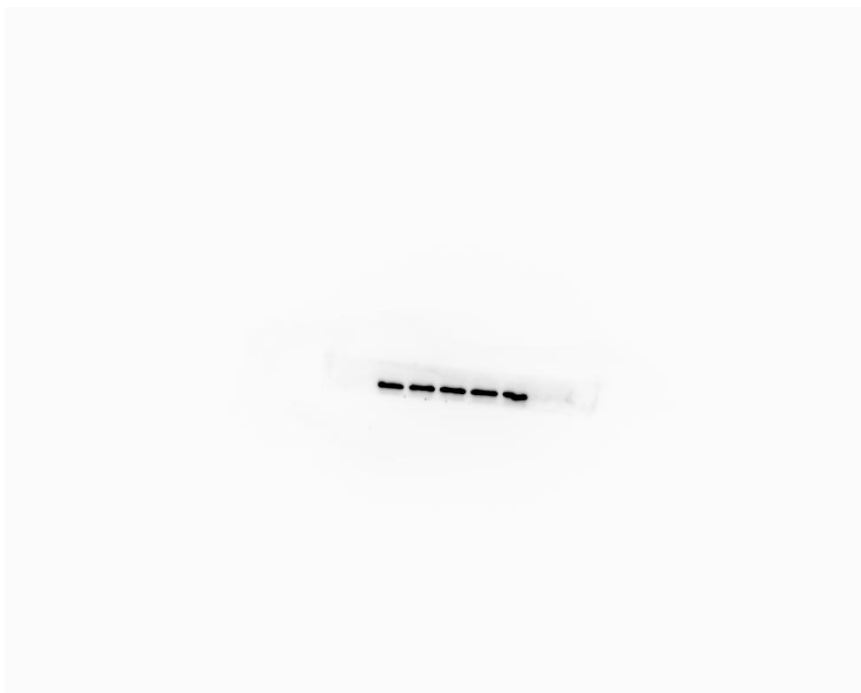

**GAPDH**

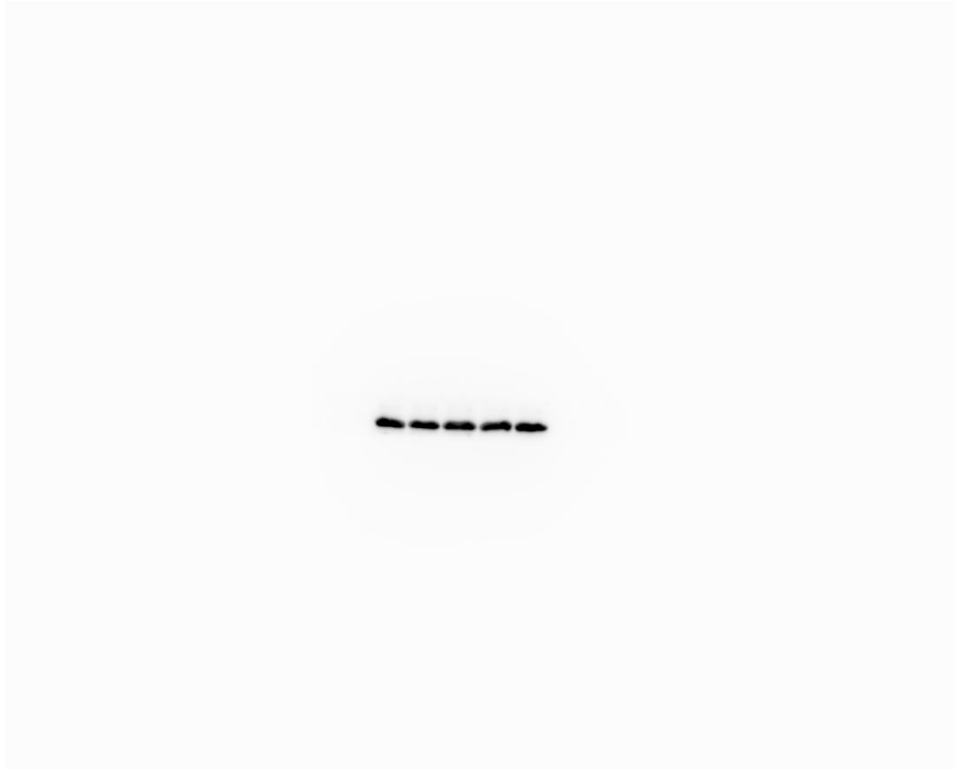

**FigS5E**

**GFP-IP**

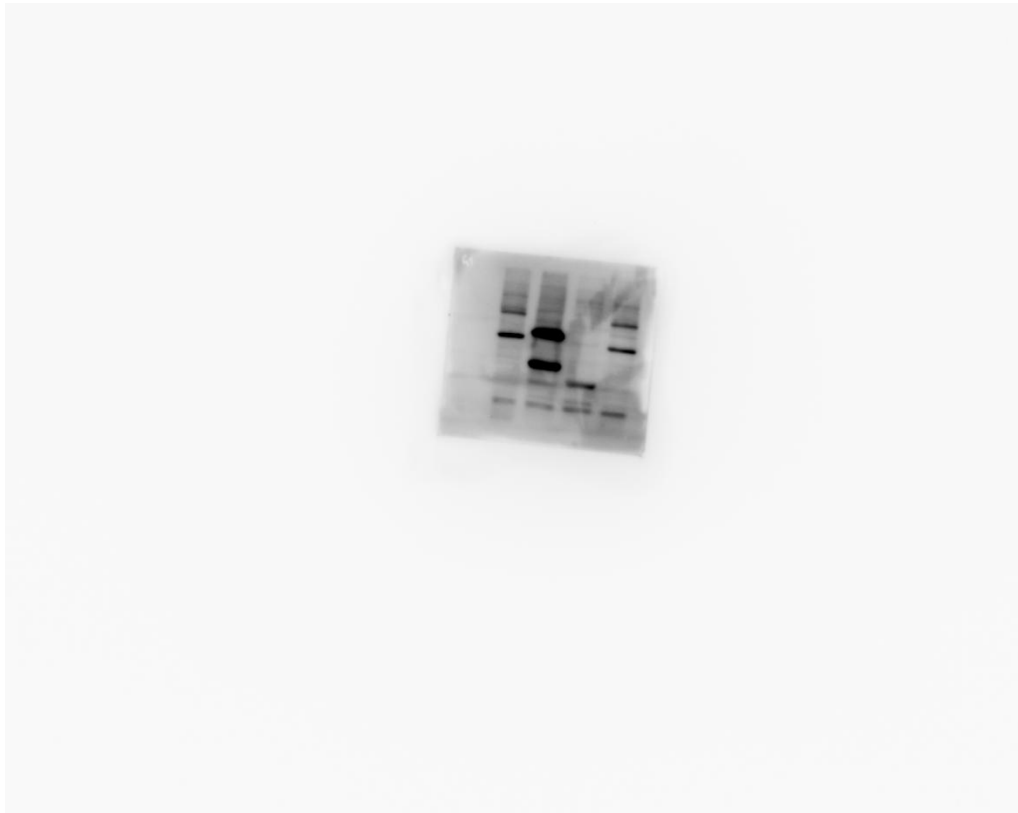

### Flag-IP

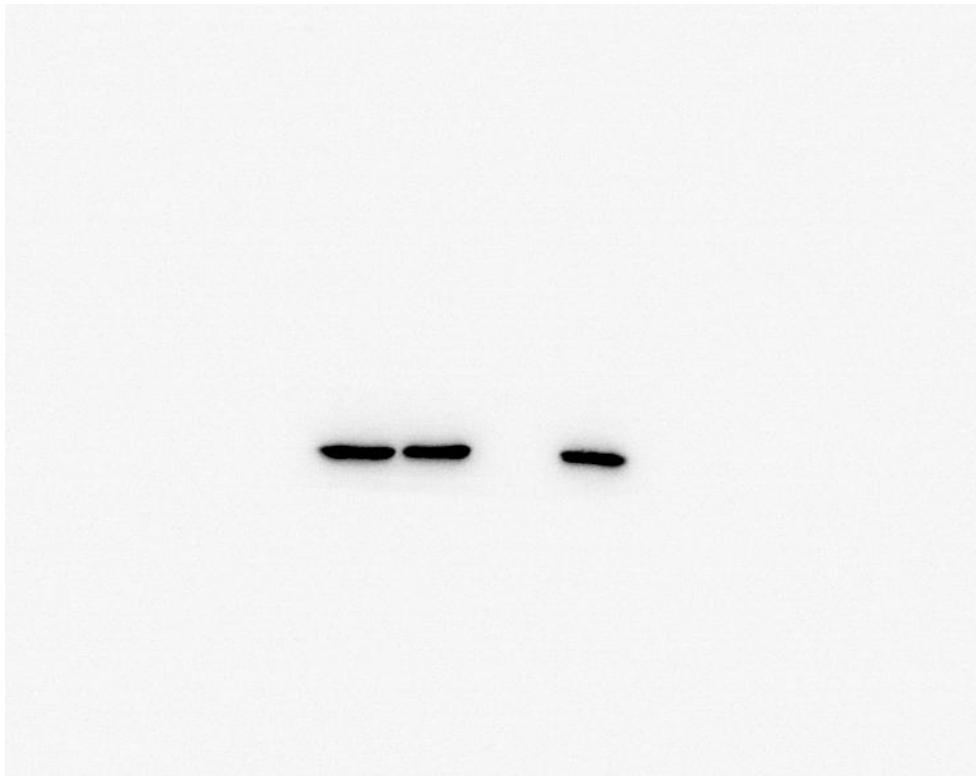

### GFP-Input

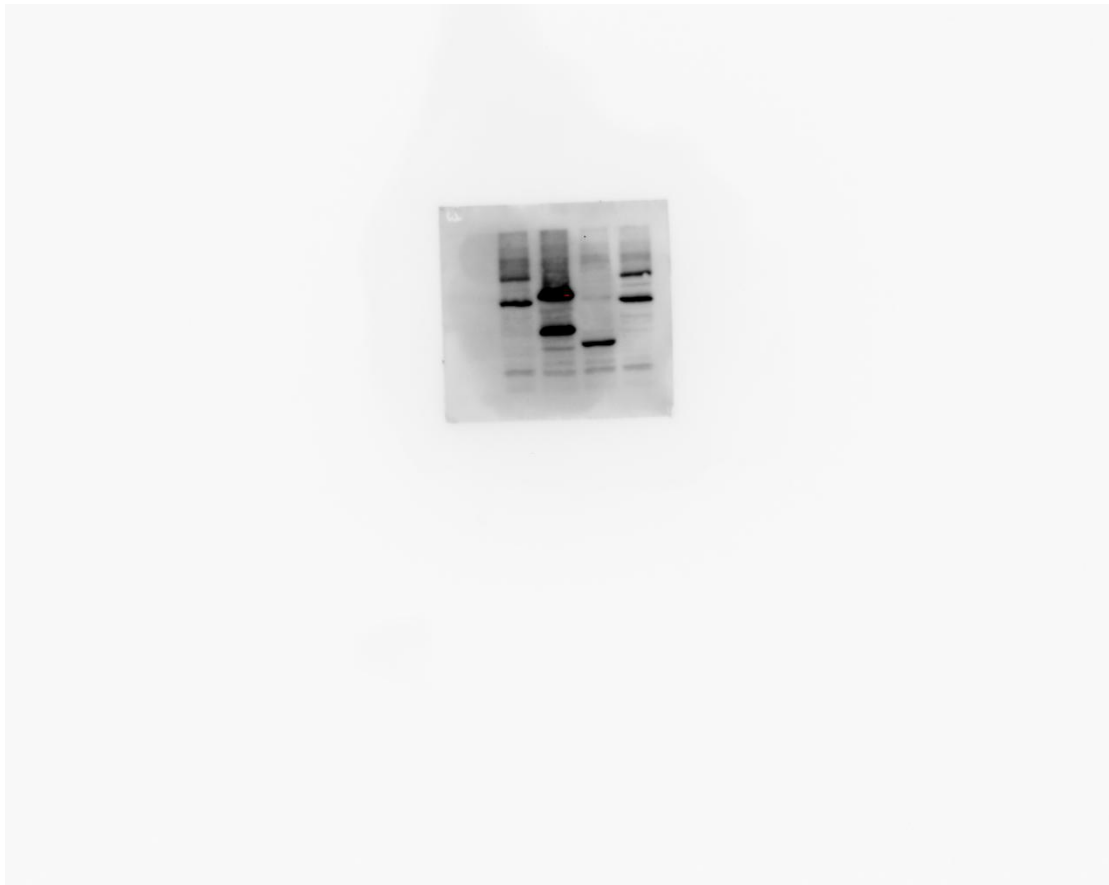

**Flag-Input**

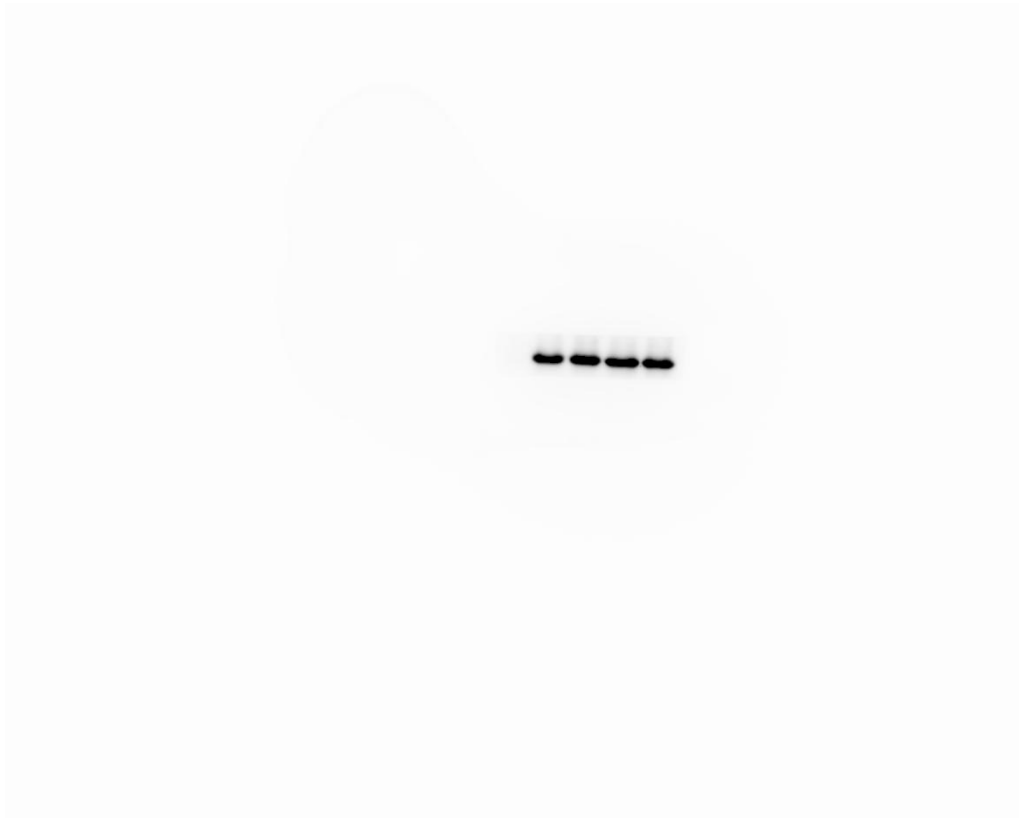

**GAPDH**

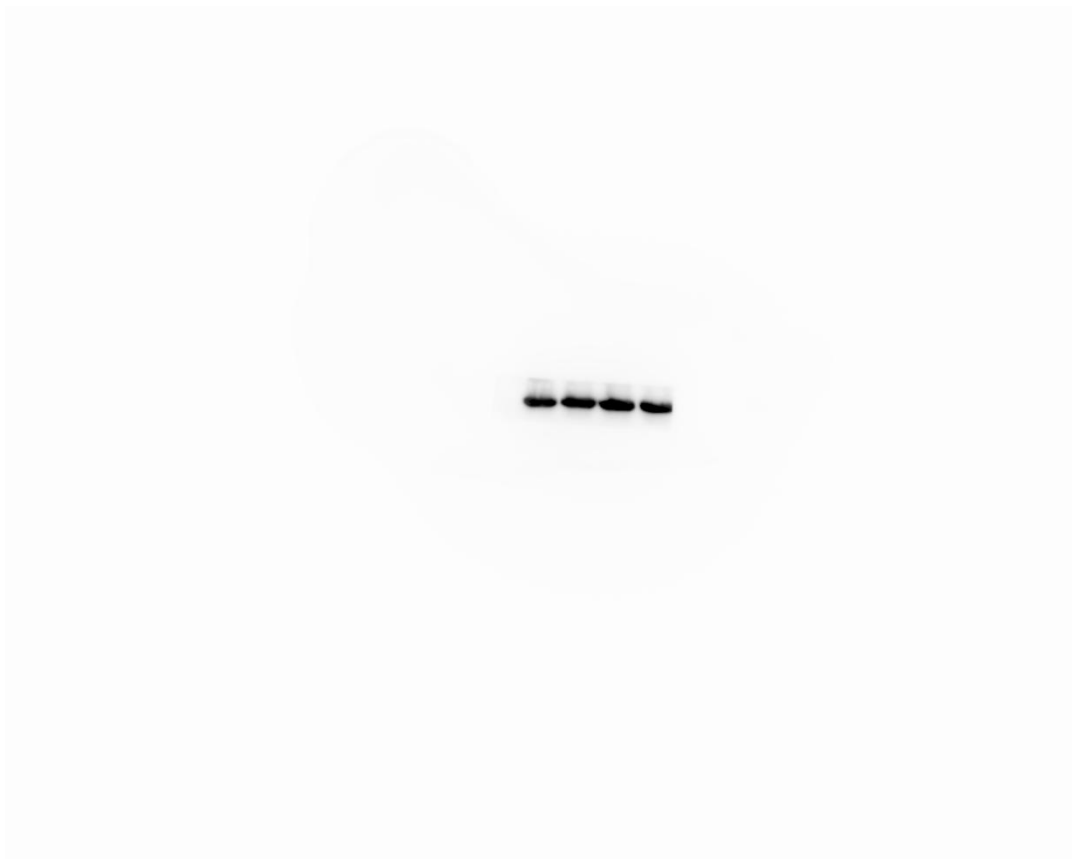

**FigS5F**

**MED12**

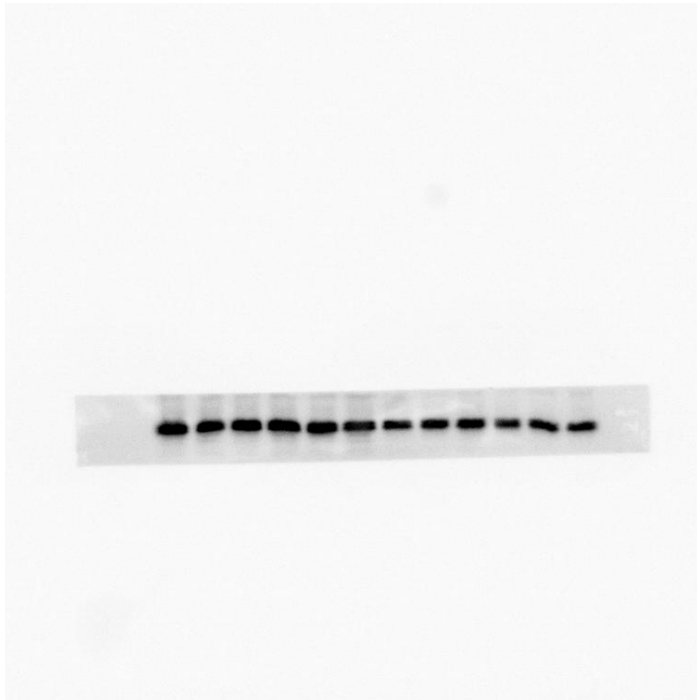

**$\gamma$ H2A**

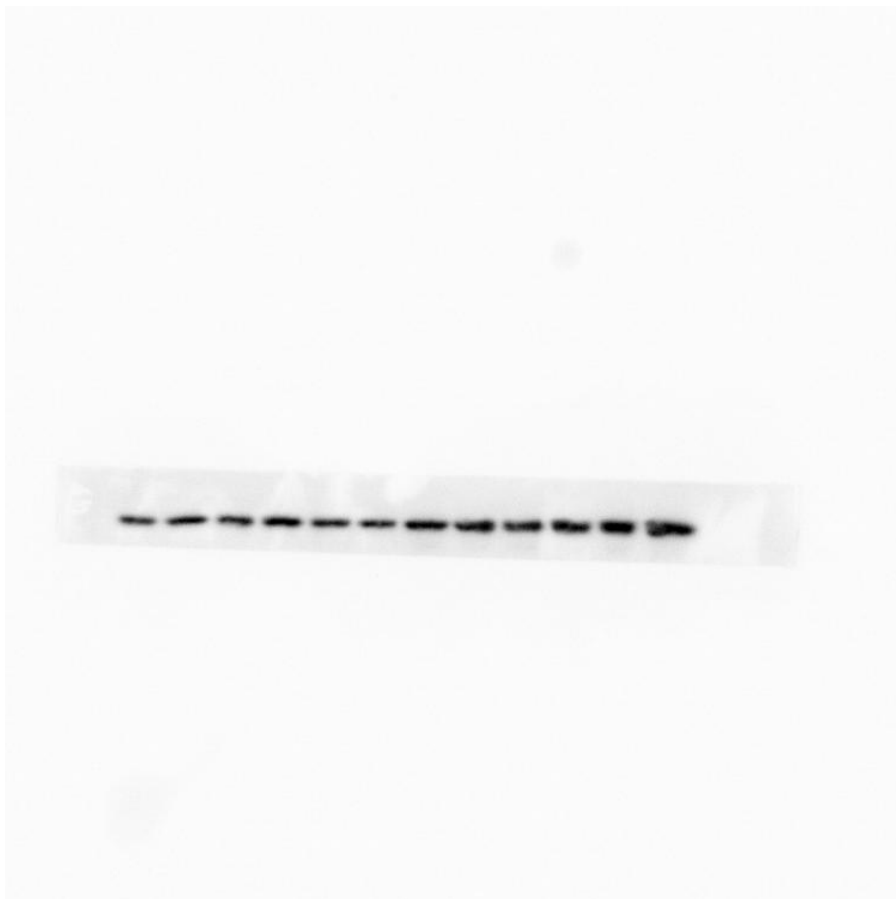

**P21**

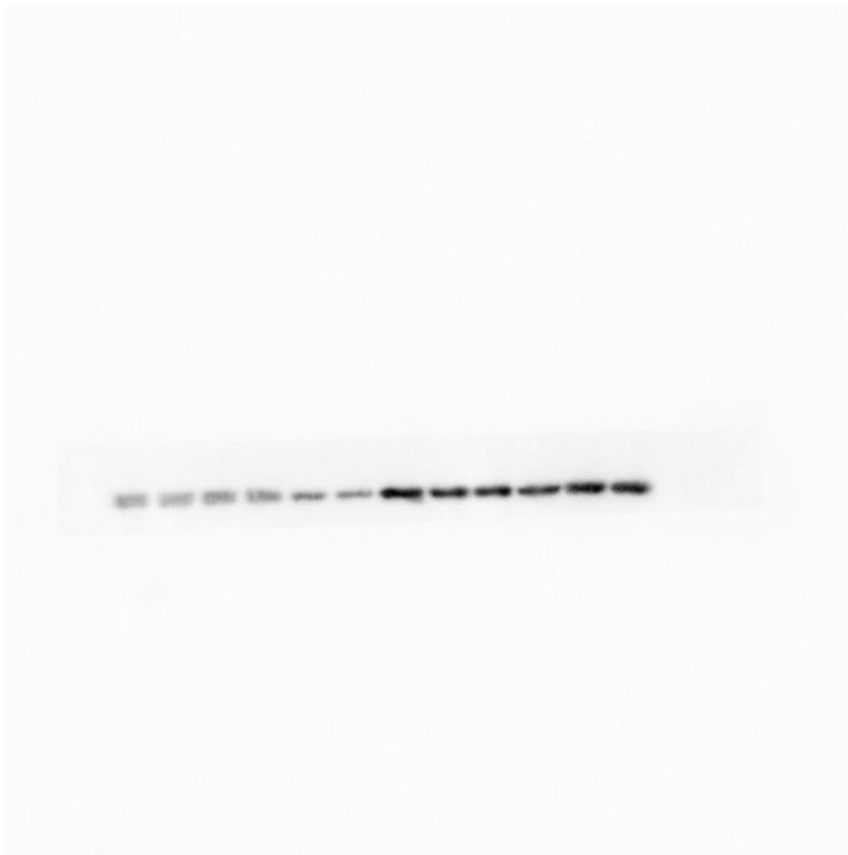

**GAPDH**

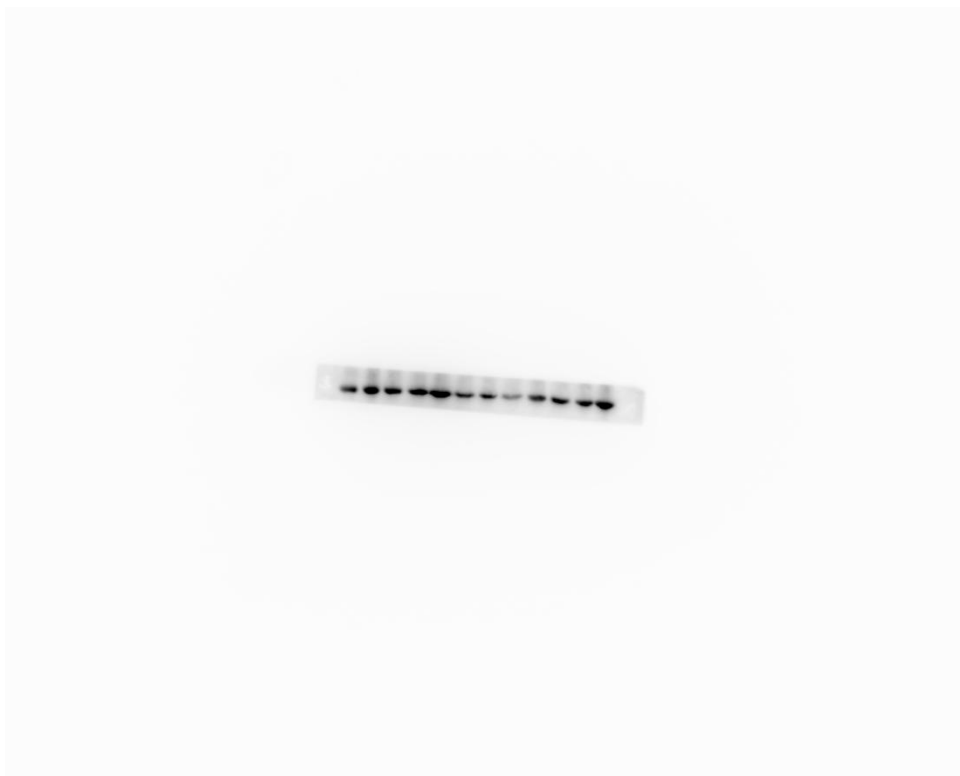

**FigS5H**

**WT-MED12**

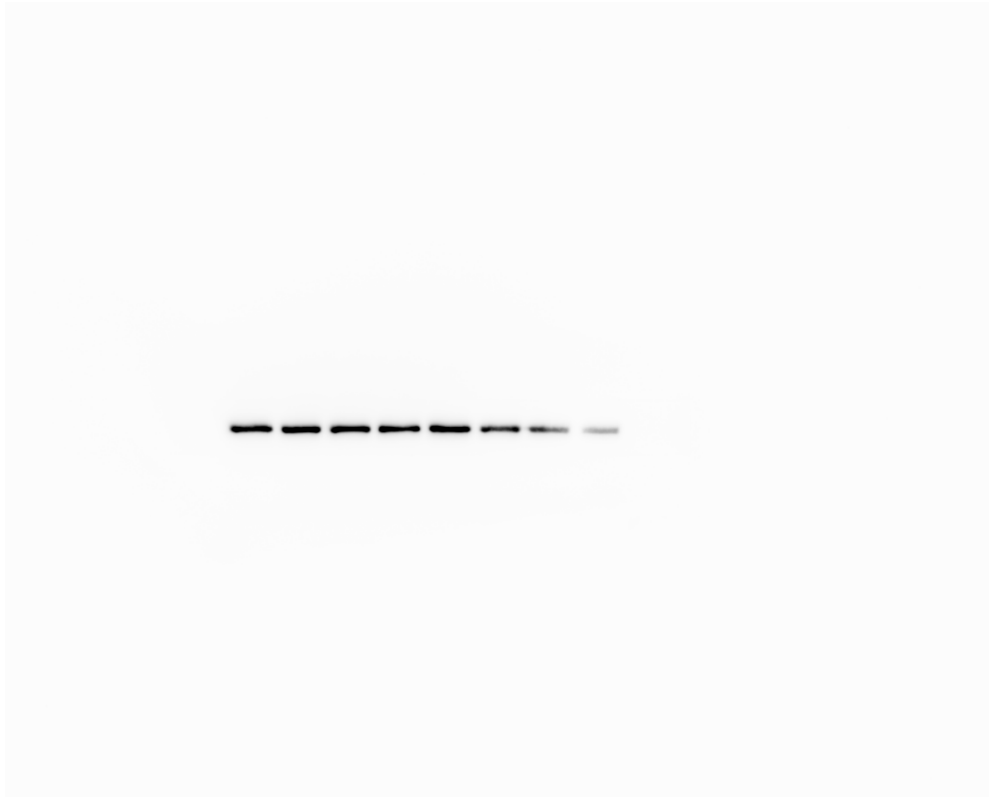

**WT-GAPDH**

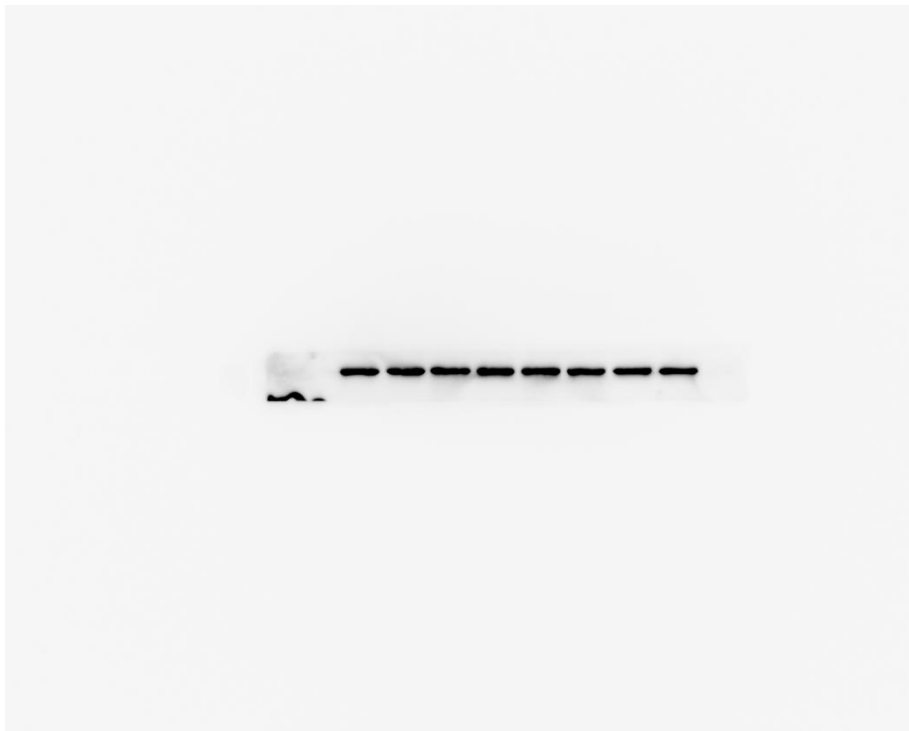

**RF-MED12**

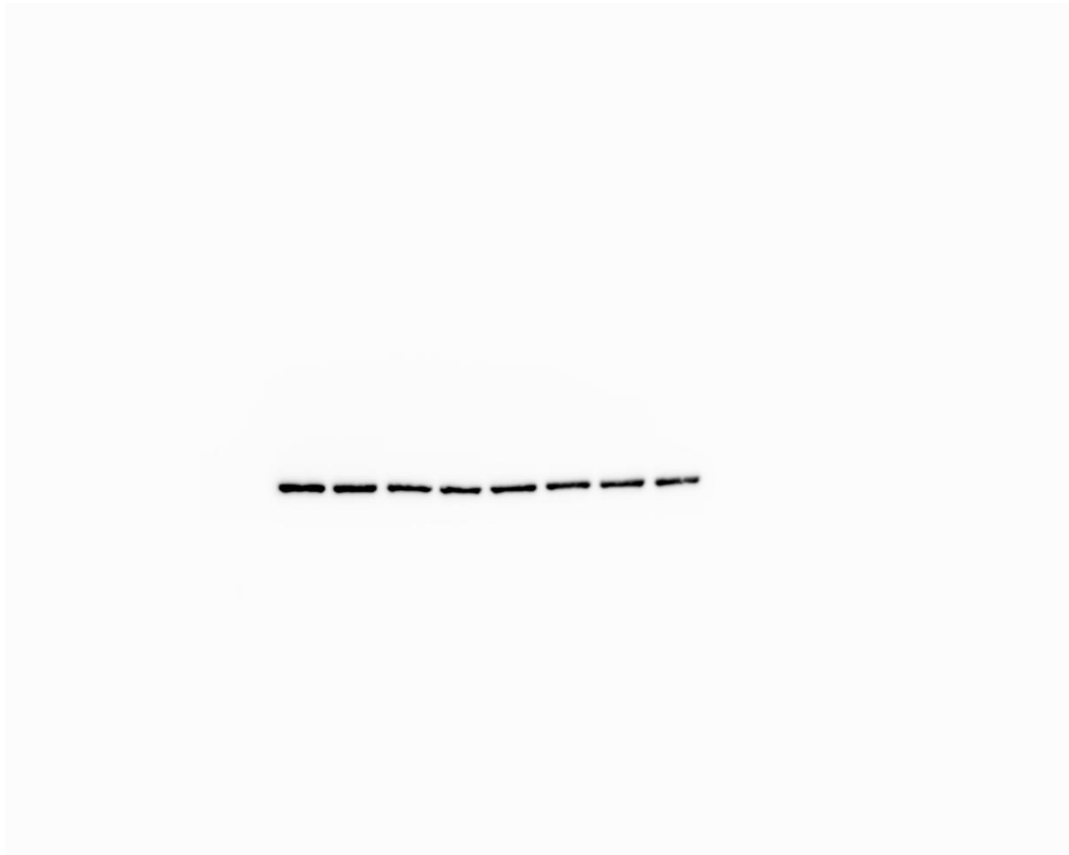

**RF-GAPDH**

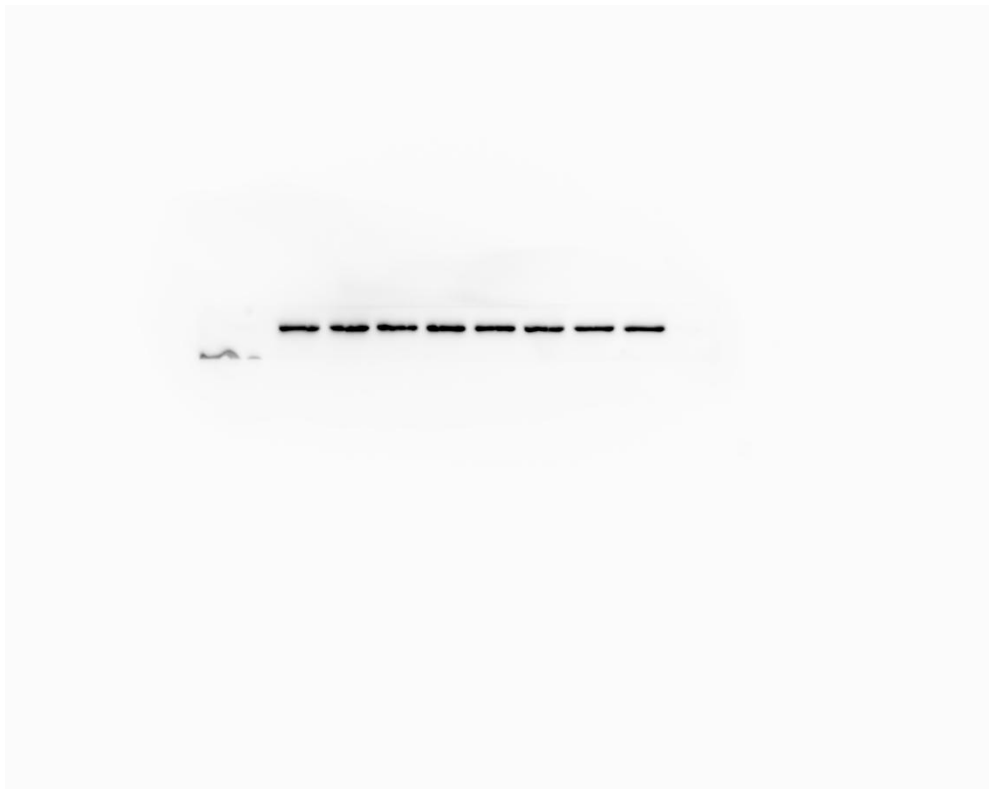

**FigS7A**

**MED12**

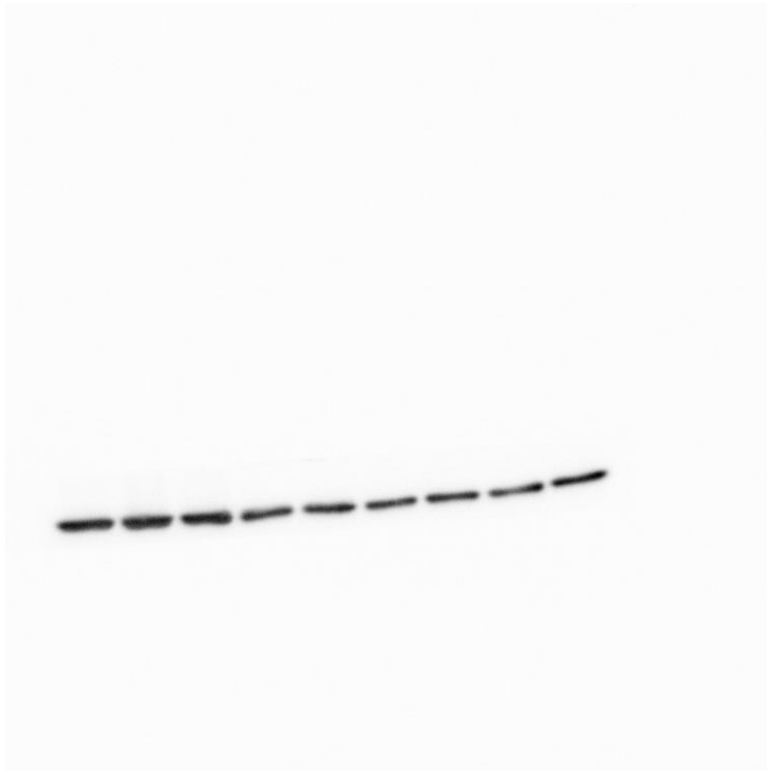

**GAPDH**

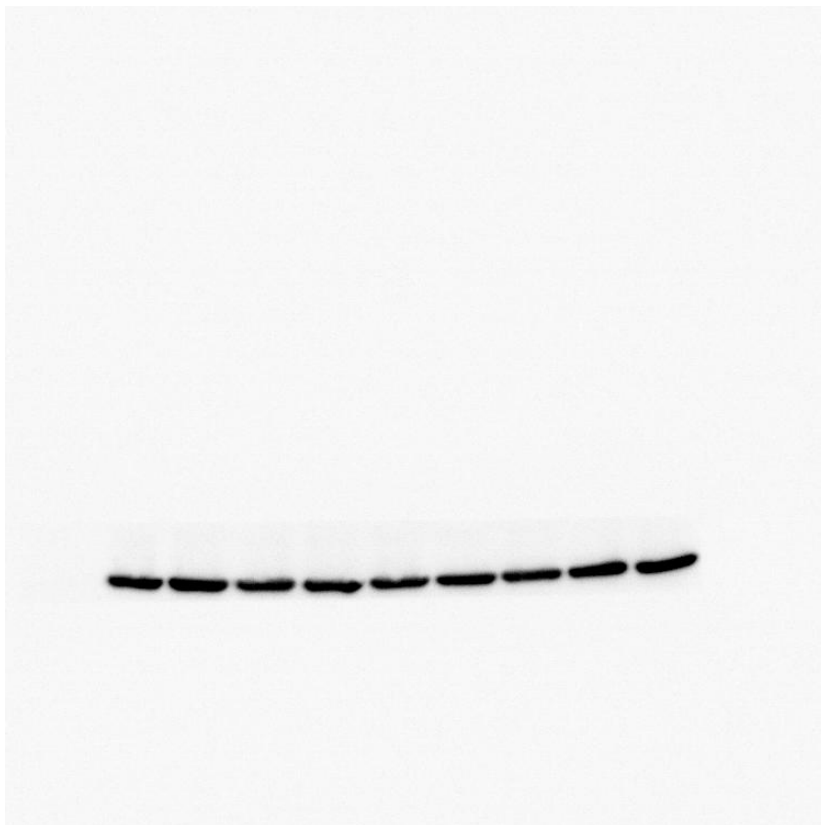

FigS7C

PP53

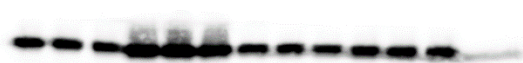

P53

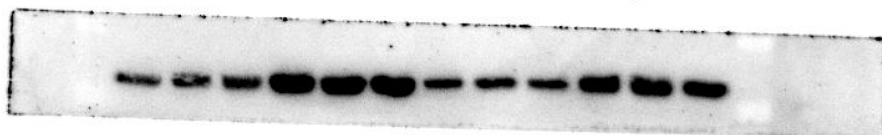

**P21**

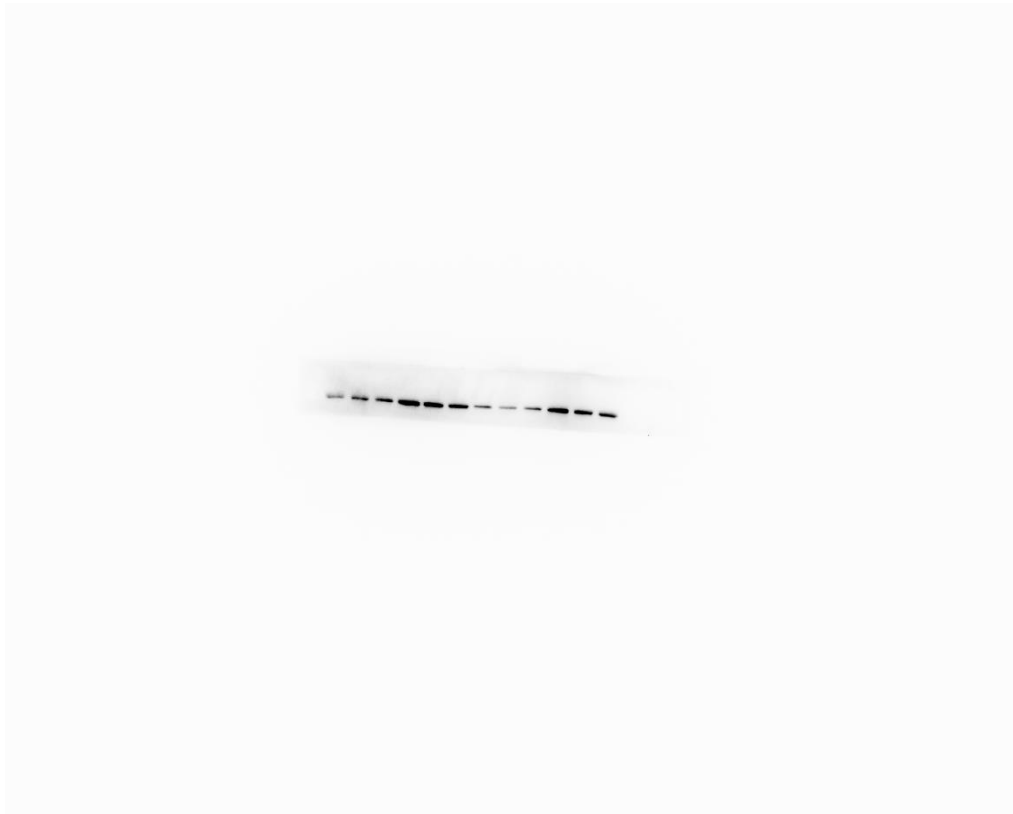

**P16**

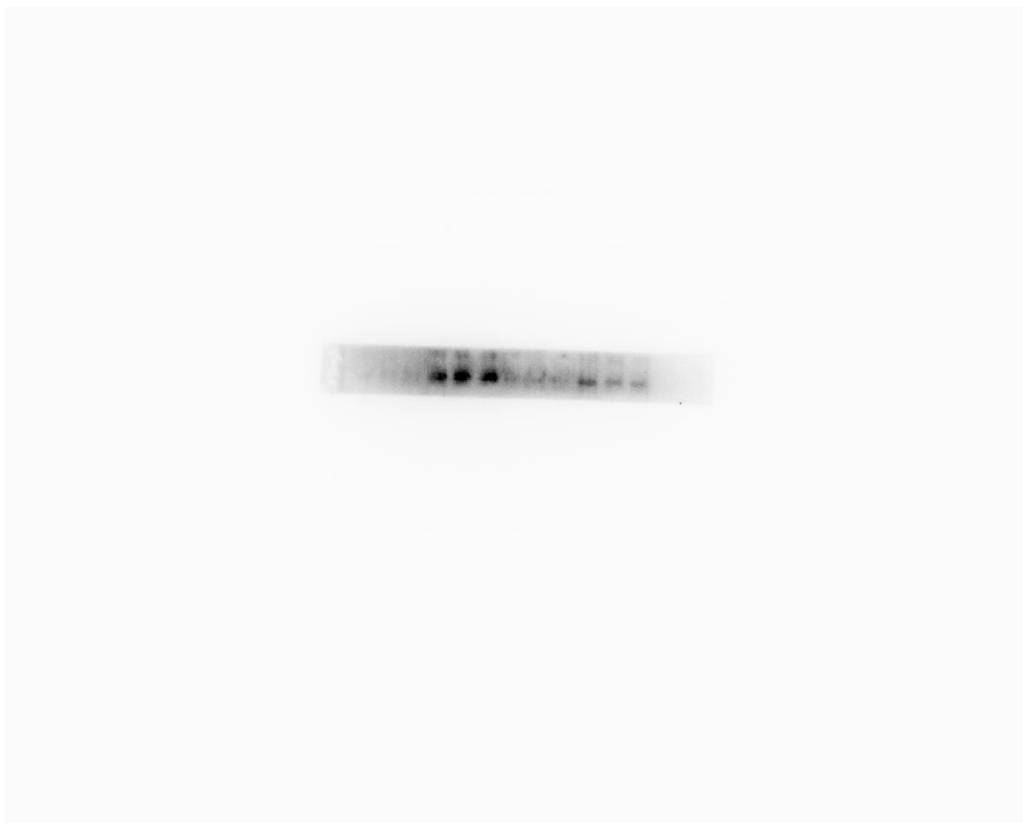

**GAPDH**

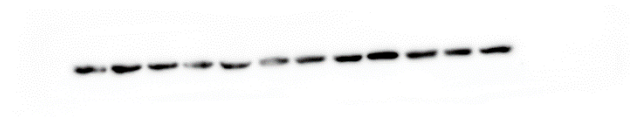

**FigS8A**

**PP53**

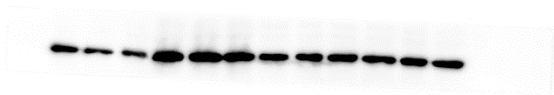

P53

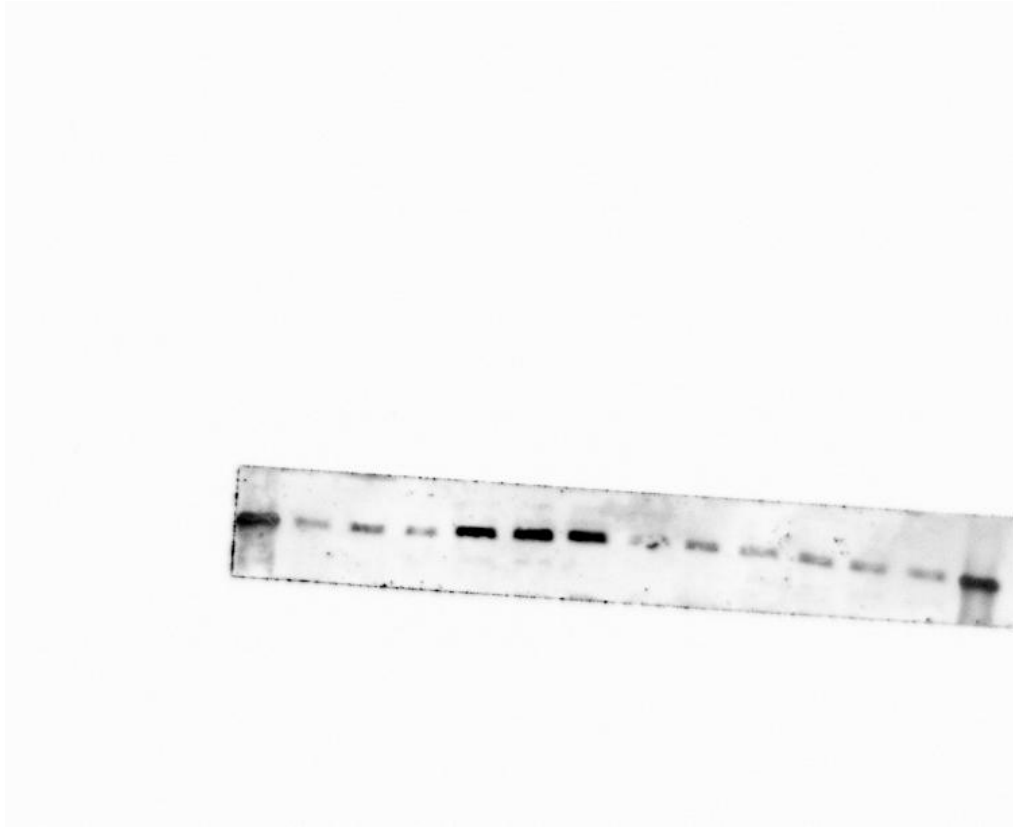

P21

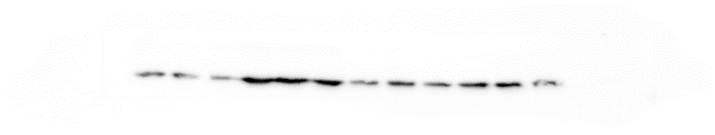

**P16**

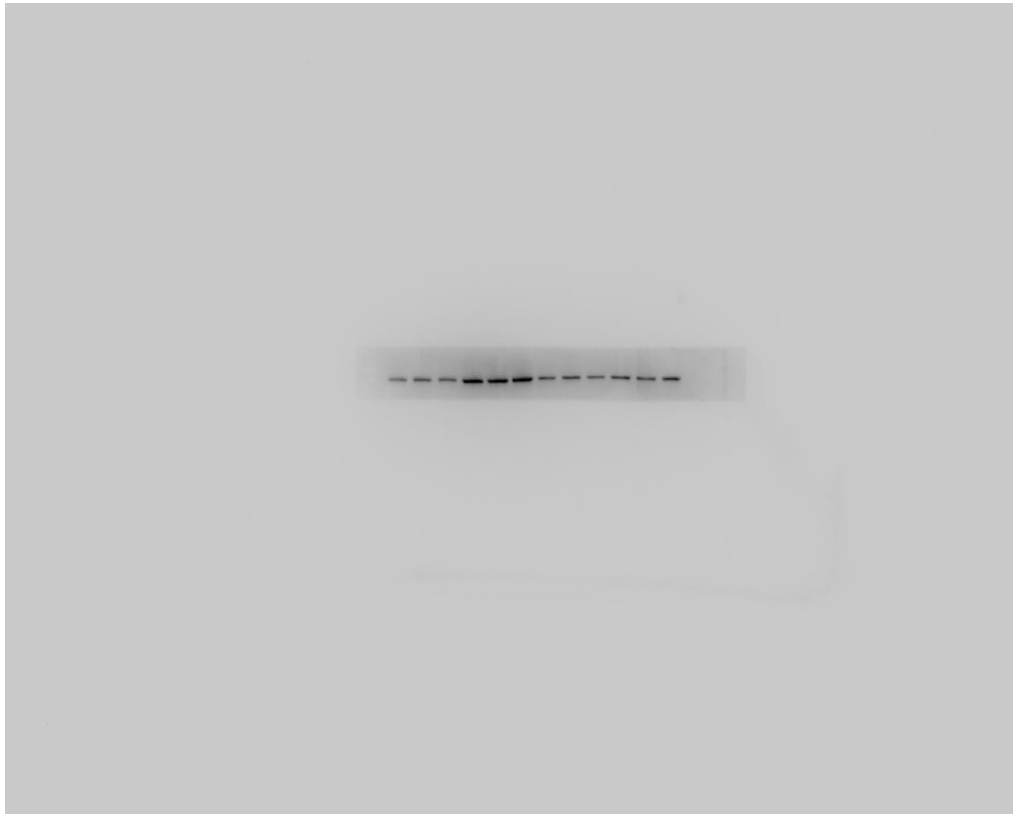

**GAPDH**

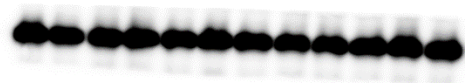

**FigS8B**

**p-TBK1**

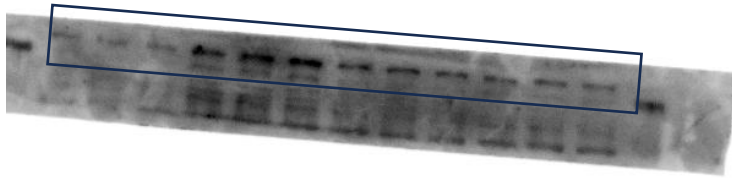

**TBK1**

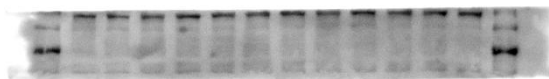

**p-IRF3**

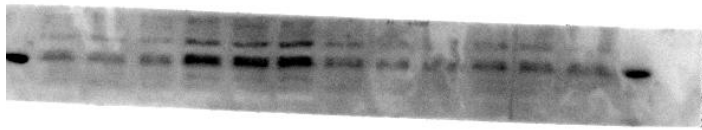

**IRF3**

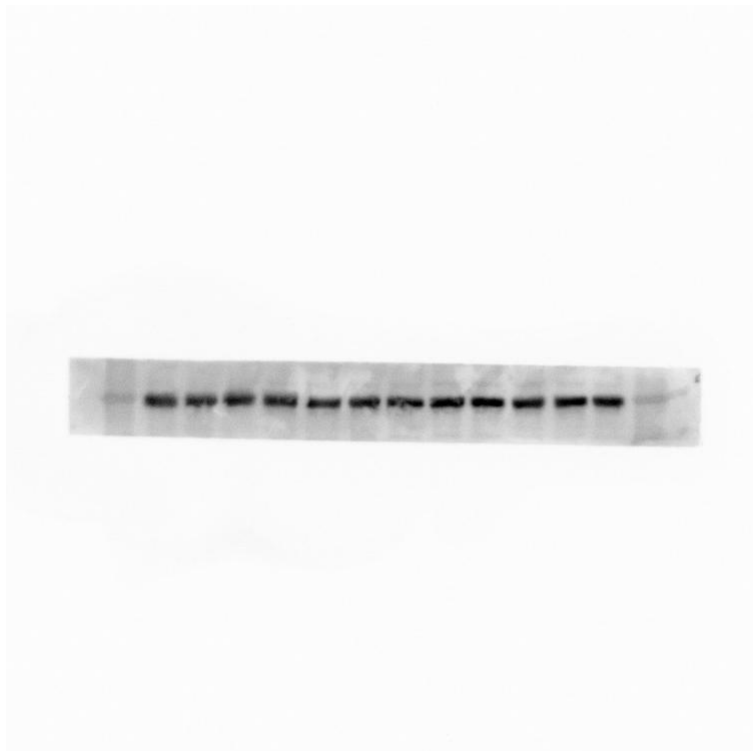

**STING**

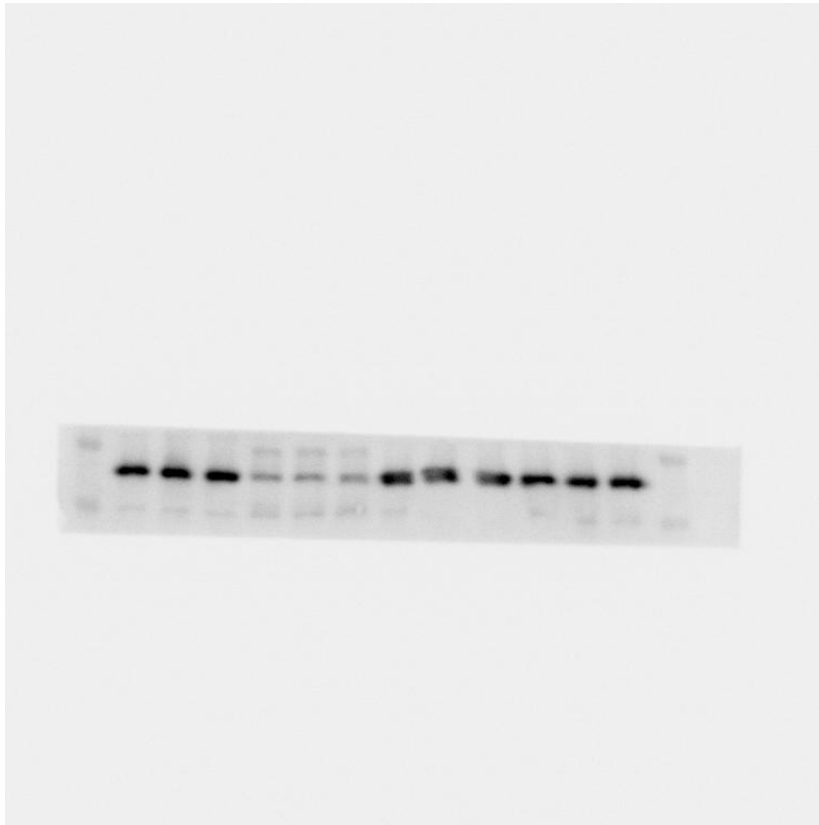

**GAPDH**

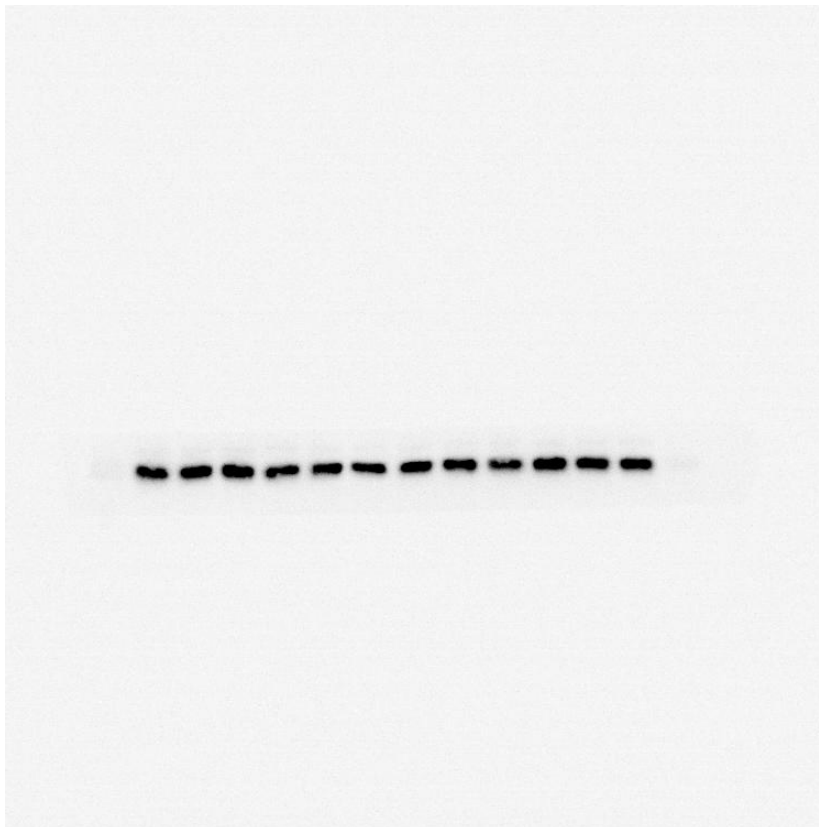

**FigS9A**

**PRMT2**

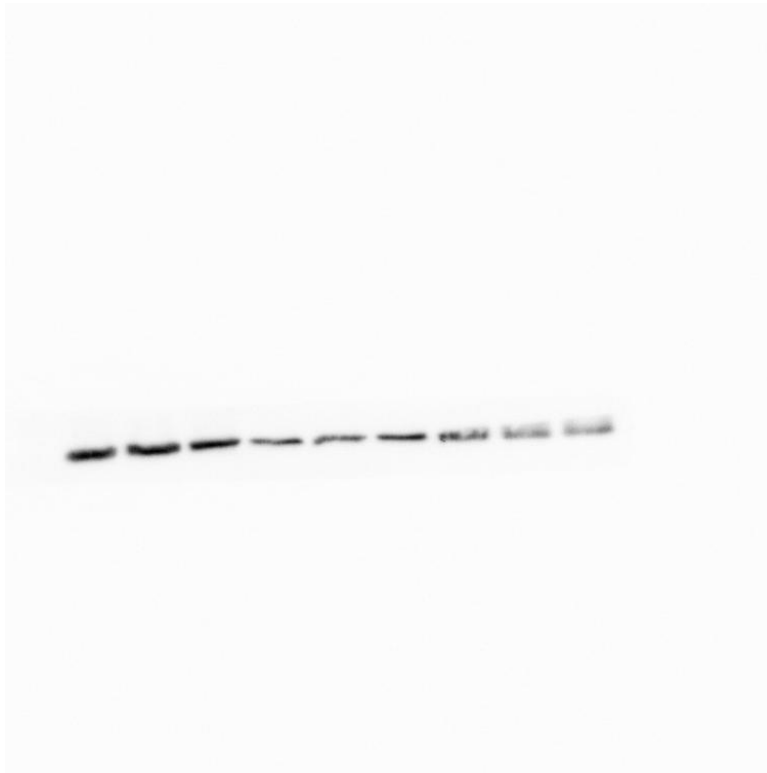

**GAPDH**

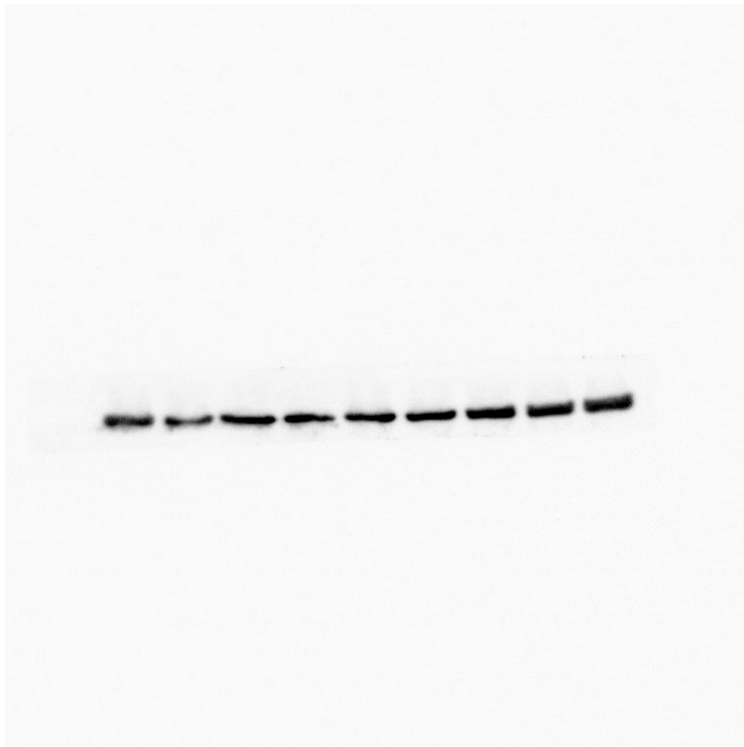

**p-TBK1**

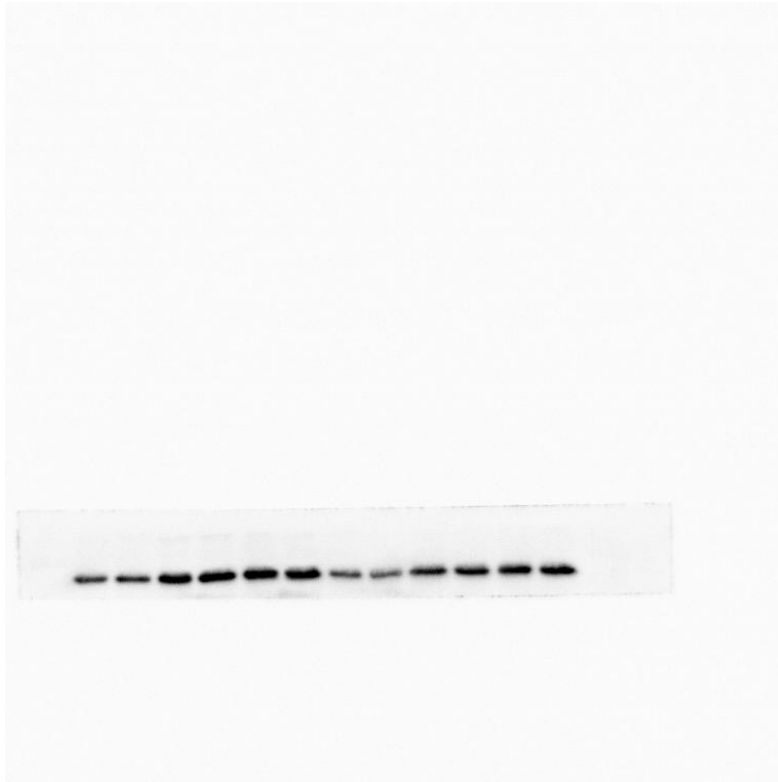

**TBK1**

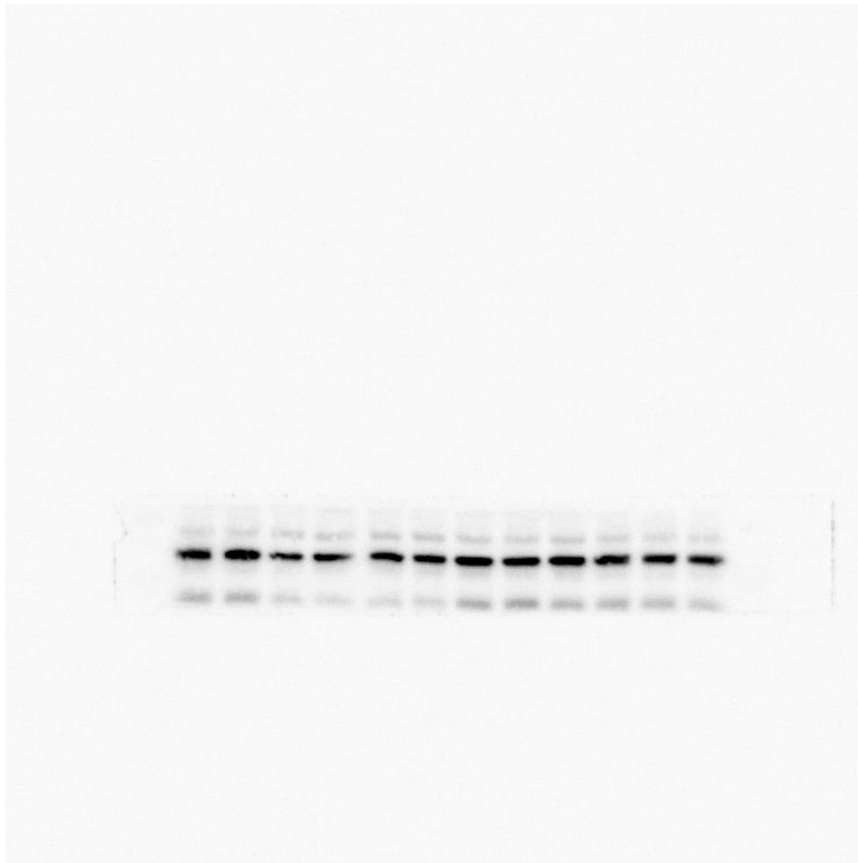

**p-IRF3**

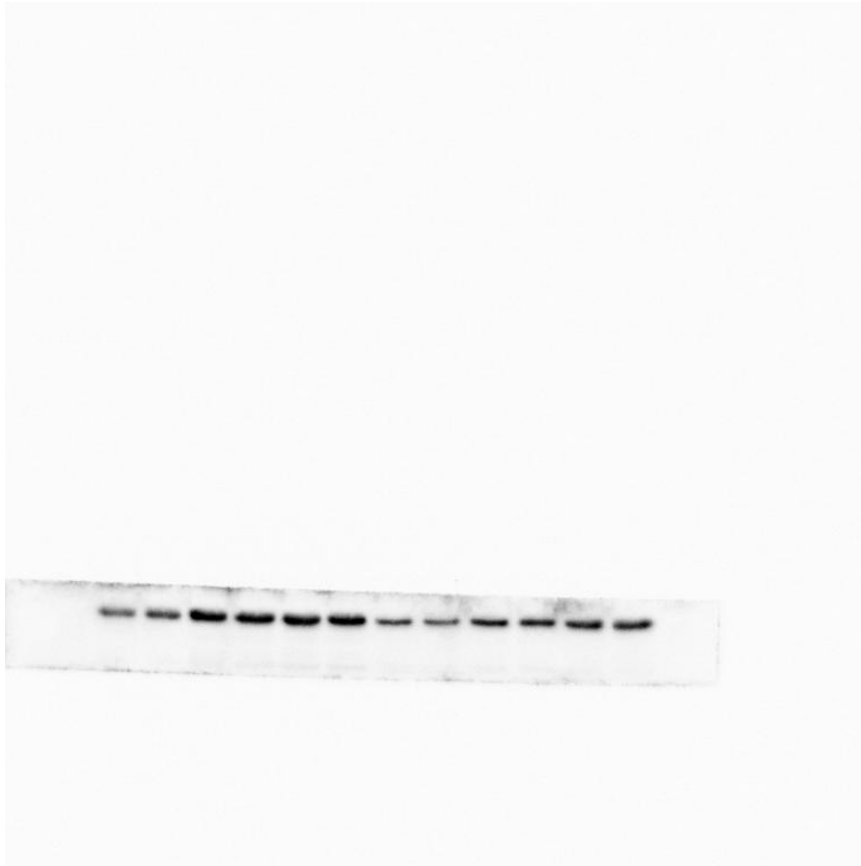

**IRF3**

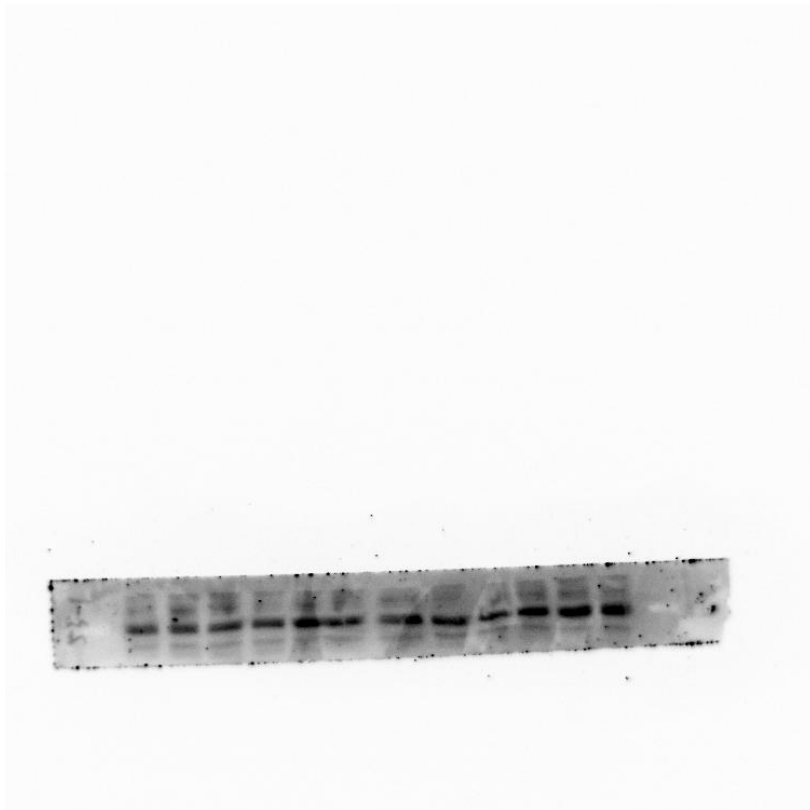

**STING**

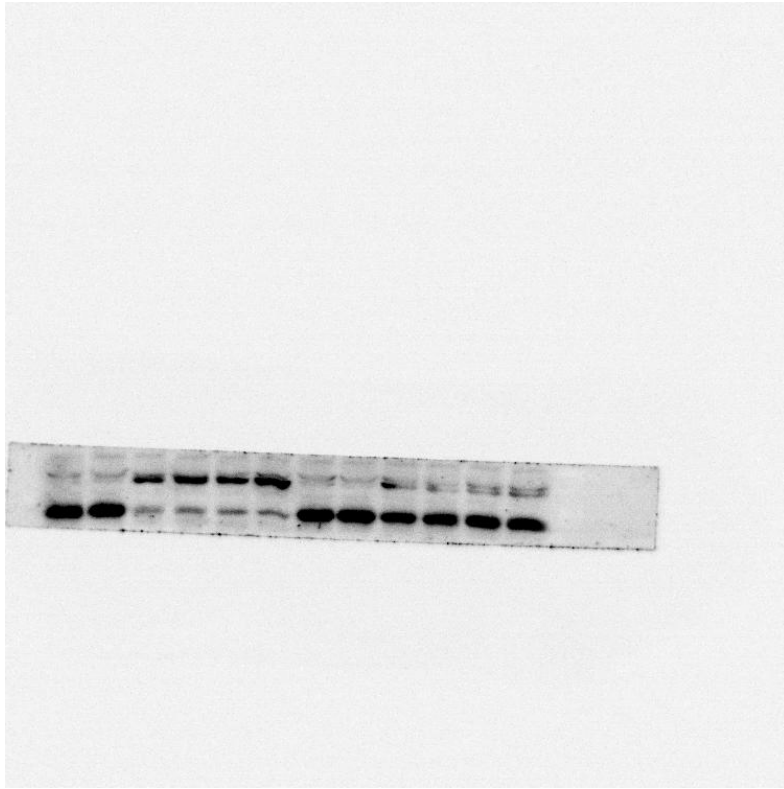

**GAPDH**

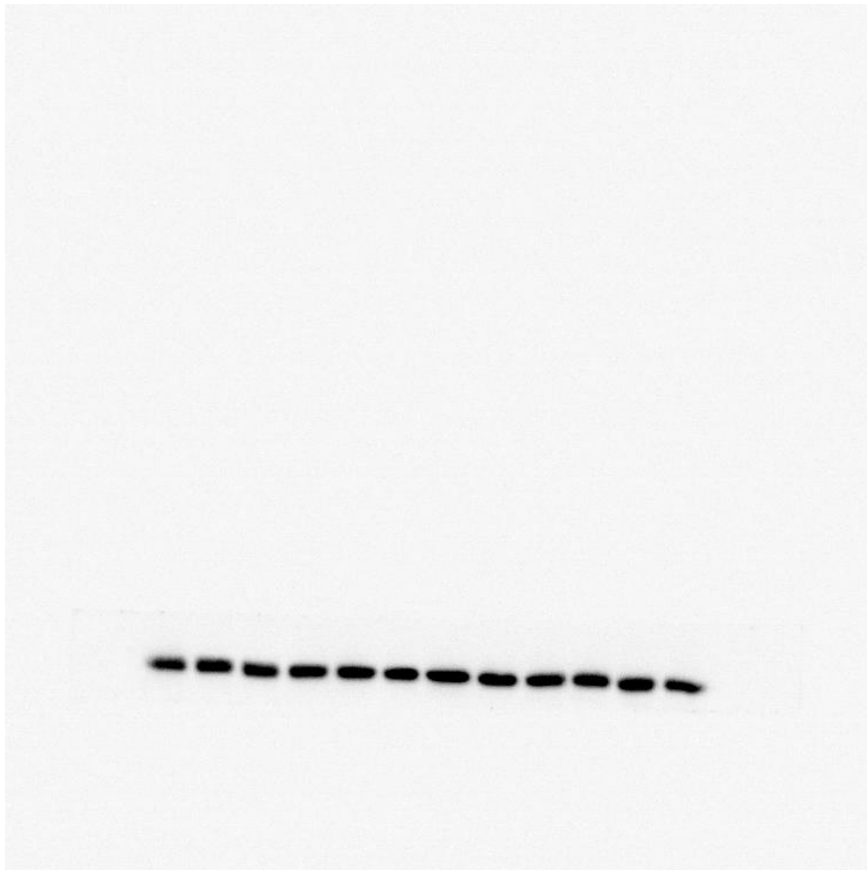

Supplement: sd1 [file 1]
